# Supplementary material for: Ependymal Dysfunction Links Ventricular Enlargement to Neuroinflammation: Implications for Hydrocephalus and Neurodegeneration
Source: Research Square preprint supplement (doi:10.21203/rs.3.rs-7569057/v1), 2025-09-23
Supplement: Supplementary file 1 [file 83cc9d1111149ef003467292.xlsx]

## Sheet: biological_process
GOID	Description	GeneRatio	BgRatio	RichFactor	FoldEnrichment	zScore	pvalue	p.adjust	qvalue	geneID
GO:0002274	myeloid leukocyte activation	37/222	277/23133	0.133574	13.9188	21.2923	1.95054e-31	5.81066e-28	4.02633e-28	ENSMUSG00000052336/ENSMUSG00000024300/ENSMUSG00000030786/ENSMUSG00000058818/ENSMUSG00000112148/ENSMUSG00000036887/ENSMUSG00000024621/ENSMUSG00000058715/ENSMUSG00000038147/ENSMUSG00000002111/ENSMUSG00000026177/ENSMUSG00000031264/ENSMUSG00000023992/ENSMUSG00000030798/ENSMUSG00000049130/ENSMUSG00000015355/ENSMUSG00000030579/ENSMUSG00000112023/ENSMUSG00000059498/ENSMUSG00000002699/ENSMUSG00000024397/…
GO:0006909	phagocytosis	31/222	237/23133	0.130802	13.6299	19.2378	3.88208e-26	5.78236e-23	4.00672e-23	ENSMUSG00000026390/ENSMUSG00000034116/ENSMUSG00000030786/ENSMUSG00000058715/ENSMUSG00000026177/ENSMUSG00000031264/ENSMUSG00000023992/ENSMUSG00000025044/ENSMUSG00000022488/ENSMUSG00000030579/ENSMUSG00000059498/ENSMUSG00000052160/ENSMUSG00000024397/ENSMUSG00000026656/ENSMUSG00000015947/ENSMUSG00000002603/ENSMUSG00000000290/ENSMUSG00000098112/ENSMUSG00000021457/ENSMUSG00000030047/ENSMUSG00000048779/…
GO:0070661	leukocyte proliferation	35/222	377/23133	0.0928382	9.67399	16.7149	2.66322e-24	2.64458e-21	1.83248e-21	ENSMUSG00000029816/ENSMUSG00000030786/ENSMUSG00000112148/ENSMUSG00000024621/ENSMUSG00000026177/ENSMUSG00000031264/ENSMUSG00000023992/ENSMUSG00000030798/ENSMUSG00000022488/ENSMUSG00000052142/ENSMUSG00000030579/ENSMUSG00000112023/ENSMUSG00000071713/ENSMUSG00000024397/ENSMUSG00000026656/ENSMUSG00000002603/ENSMUSG00000000290/ENSMUSG00000031101/ENSMUSG00000021457/ENSMUSG00000048583/ENSMUSG00000021624/…
GO:0046651	lymphocyte proliferation	32/222	335/23133	0.0955224	9.95369	16.2494	1.1893e-22	8.8573e-20	6.13741e-20	ENSMUSG00000029816/ENSMUSG00000030786/ENSMUSG00000112148/ENSMUSG00000024621/ENSMUSG00000026177/ENSMUSG00000031264/ENSMUSG00000030798/ENSMUSG00000022488/ENSMUSG00000052142/ENSMUSG00000030579/ENSMUSG00000112023/ENSMUSG00000024397/ENSMUSG00000026656/ENSMUSG00000002603/ENSMUSG00000000290/ENSMUSG00000031101/ENSMUSG00000021457/ENSMUSG00000048583/ENSMUSG00000021624/ENSMUSG00000033220/ENSMUSG00000026288/…
GO:0032943	mononuclear cell proliferation	32/222	342/23133	0.0935673	9.74996	16.0472	2.24974e-22	1.34039e-19	9.28786e-20	ENSMUSG00000029816/ENSMUSG00000030786/ENSMUSG00000112148/ENSMUSG00000024621/ENSMUSG00000026177/ENSMUSG00000031264/ENSMUSG00000030798/ENSMUSG00000022488/ENSMUSG00000052142/ENSMUSG00000030579/ENSMUSG00000112023/ENSMUSG00000024397/ENSMUSG00000026656/ENSMUSG00000002603/ENSMUSG00000000290/ENSMUSG00000031101/ENSMUSG00000021457/ENSMUSG00000048583/ENSMUSG00000021624/ENSMUSG00000033220/ENSMUSG00000026288/…
GO:0006935	chemotaxis	36/222	473/23133	0.0761099	7.93086	14.9916	4.9027e-22	2.40436e-19	1.66603e-19	ENSMUSG00000052336/ENSMUSG00000034116/ENSMUSG00000030786/ENSMUSG00000050370/ENSMUSG00000024621/ENSMUSG00000058715/ENSMUSG00000002111/ENSMUSG00000023992/ENSMUSG00000022488/ENSMUSG00000049130/ENSMUSG00000020573/ENSMUSG00000059498/ENSMUSG00000024397/ENSMUSG00000002603/ENSMUSG00000040552/ENSMUSG00000000290/ENSMUSG00000098112/ENSMUSG00000021457/ENSMUSG00000017737/ENSMUSG00000033220/ENSMUSG00000019122/…
GO:0042330	taxis	36/222	475/23133	0.0757895	7.89747	14.9516	5.64972e-22	2.40436e-19	1.66603e-19	ENSMUSG00000052336/ENSMUSG00000034116/ENSMUSG00000030786/ENSMUSG00000050370/ENSMUSG00000024621/ENSMUSG00000058715/ENSMUSG00000002111/ENSMUSG00000023992/ENSMUSG00000022488/ENSMUSG00000049130/ENSMUSG00000020573/ENSMUSG00000059498/ENSMUSG00000024397/ENSMUSG00000002603/ENSMUSG00000040552/ENSMUSG00000000290/ENSMUSG00000098112/ENSMUSG00000021457/ENSMUSG00000017737/ENSMUSG00000033220/ENSMUSG00000019122/…
GO:0002366	leukocyte activation involved in immune response	30/222	339/23133	0.0884956	9.22148	15.0107	2.50807e-20	9.33943e-18	6.47148e-18	ENSMUSG00000004707/ENSMUSG00000052336/ENSMUSG00000024300/ENSMUSG00000030786/ENSMUSG00000112148/ENSMUSG00000058715/ENSMUSG00000038147/ENSMUSG00000002111/ENSMUSG00000026177/ENSMUSG00000031264/ENSMUSG00000023992/ENSMUSG00000022488/ENSMUSG00000030579/ENSMUSG00000002603/ENSMUSG00000000290/ENSMUSG00000030144/ENSMUSG00000021457/ENSMUSG00000021624/ENSMUSG00000033220/ENSMUSG00000021998/ENSMUSG00000040528/…
GO:0050900	leukocyte migration	32/222	401/23133	0.0798005	8.31543	14.5464	2.84872e-20	9.42927e-18	6.53374e-18	ENSMUSG00000052336/ENSMUSG00000024300/ENSMUSG00000034116/ENSMUSG00000030786/ENSMUSG00000050370/ENSMUSG00000022548/ENSMUSG00000024621/ENSMUSG00000058715/ENSMUSG00000002111/ENSMUSG00000023992/ENSMUSG00000022488/ENSMUSG00000049130/ENSMUSG00000059498/ENSMUSG00000024397/ENSMUSG00000002603/ENSMUSG00000040552/ENSMUSG00000000290/ENSMUSG00000021457/ENSMUSG00000017737/ENSMUSG00000033220/ENSMUSG00000019122/…
GO:0002263	cell activation involved in immune response	30/222	343/23133	0.0874636	9.11394	14.9028	3.50671e-20	1.04465e-17	7.2386e-18	ENSMUSG00000004707/ENSMUSG00000052336/ENSMUSG00000024300/ENSMUSG00000030786/ENSMUSG00000112148/ENSMUSG00000058715/ENSMUSG00000038147/ENSMUSG00000002111/ENSMUSG00000026177/ENSMUSG00000031264/ENSMUSG00000023992/ENSMUSG00000022488/ENSMUSG00000030579/ENSMUSG00000002603/ENSMUSG00000000290/ENSMUSG00000030144/ENSMUSG00000021457/ENSMUSG00000021624/ENSMUSG00000033220/ENSMUSG00000021998/ENSMUSG00000040528/…
GO:0002697	regulation of immune effector process	34/222	475/23133	0.0715789	7.45872	14.0005	5.31156e-20	1.43847e-17	9.96744e-18	ENSMUSG00000052336/ENSMUSG00000034116/ENSMUSG00000030786/ENSMUSG00000112148/ENSMUSG00000058715/ENSMUSG00000038147/ENSMUSG00000002111/ENSMUSG00000031264/ENSMUSG00000023992/ENSMUSG00000030798/ENSMUSG00000022488/ENSMUSG00000044583/ENSMUSG00000030579/ENSMUSG00000112023/ENSMUSG00000059498/ENSMUSG00000015950/ENSMUSG00000026656/ENSMUSG00000015947/ENSMUSG00000002603/ENSMUSG00000000290/ENSMUSG00000031101/…
GO:0002275	myeloid cell activation involved in immune response	20/222	114/23133	0.175439	18.2812	18.2072	8.02204e-20	1.99147e-17	1.37993e-17	ENSMUSG00000052336/ENSMUSG00000024300/ENSMUSG00000030786/ENSMUSG00000112148/ENSMUSG00000058715/ENSMUSG00000038147/ENSMUSG00000002111/ENSMUSG00000031264/ENSMUSG00000023992/ENSMUSG00000030579/ENSMUSG00000000290/ENSMUSG00000021457/ENSMUSG00000033220/ENSMUSG00000040528/ENSMUSG00000053158/ENSMUSG00000020399/ENSMUSG00000040751/ENSMUSG00000004266/ENSMUSG00000020143/ENSMUSG00000034708
GO:0060326	cell chemotaxis	29/222	331/23133	0.0876133	9.12954	14.6641	1.4781e-19	3.38712e-17	2.347e-17	ENSMUSG00000052336/ENSMUSG00000034116/ENSMUSG00000030786/ENSMUSG00000050370/ENSMUSG00000024621/ENSMUSG00000058715/ENSMUSG00000002111/ENSMUSG00000022488/ENSMUSG00000049130/ENSMUSG00000059498/ENSMUSG00000024397/ENSMUSG00000040552/ENSMUSG00000000290/ENSMUSG00000098112/ENSMUSG00000021457/ENSMUSG00000017737/ENSMUSG00000033220/ENSMUSG00000019122/ENSMUSG00000029304/ENSMUSG00000042190/ENSMUSG00000030707/…
GO:0030595	leukocyte chemotaxis	25/222	237/23133	0.105485	10.9918	15.2195	6.26735e-19	1.3336e-16	9.24081e-17	ENSMUSG00000052336/ENSMUSG00000034116/ENSMUSG00000030786/ENSMUSG00000050370/ENSMUSG00000024621/ENSMUSG00000058715/ENSMUSG00000002111/ENSMUSG00000022488/ENSMUSG00000049130/ENSMUSG00000059498/ENSMUSG00000024397/ENSMUSG00000040552/ENSMUSG00000000290/ENSMUSG00000021457/ENSMUSG00000017737/ENSMUSG00000033220/ENSMUSG00000019122/ENSMUSG00000029304/ENSMUSG00000042190/ENSMUSG00000030707/ENSMUSG00000034786/…
GO:0042098	T cell proliferation	25/222	246/23133	0.101626	10.5897	14.8847	1.55227e-18	3.0828e-16	2.13614e-16	ENSMUSG00000029816/ENSMUSG00000030786/ENSMUSG00000112148/ENSMUSG00000026177/ENSMUSG00000030798/ENSMUSG00000022488/ENSMUSG00000052142/ENSMUSG00000112023/ENSMUSG00000024397/ENSMUSG00000002603/ENSMUSG00000000290/ENSMUSG00000031101/ENSMUSG00000021457/ENSMUSG00000048583/ENSMUSG00000033220/ENSMUSG00000003206/ENSMUSG00000020399/ENSMUSG00000030707/ENSMUSG00000052085/ENSMUSG00000030830/ENSMUSG00000004266/…
GO:0002757	immune response-activating signaling pathway	33/222	499/23133	0.0661323	6.89116	13.0958	2.16088e-18	4.02328e-16	2.78781e-16	ENSMUSG00000022126/ENSMUSG00000030786/ENSMUSG00000112148/ENSMUSG00000058715/ENSMUSG00000031264/ENSMUSG00000040522/ENSMUSG00000023992/ENSMUSG00000022488/ENSMUSG00000033777/ENSMUSG00000049130/ENSMUSG00000044583/ENSMUSG00000030579/ENSMUSG00000112023/ENSMUSG00000002699/ENSMUSG00000040552/ENSMUSG00000061132/ENSMUSG00000073490/ENSMUSG00000021457/ENSMUSG00000037860/ENSMUSG00000039997/ENSMUSG00000020437/…
GO:0070663	regulation of leukocyte proliferation	26/222	286/23133	0.0909091	9.47297	14.1927	5.02265e-18	8.80146e-16	6.09871e-16	ENSMUSG00000029816/ENSMUSG00000112148/ENSMUSG00000024621/ENSMUSG00000031264/ENSMUSG00000030798/ENSMUSG00000022488/ENSMUSG00000052142/ENSMUSG00000030579/ENSMUSG00000112023/ENSMUSG00000071713/ENSMUSG00000024397/ENSMUSG00000026656/ENSMUSG00000002603/ENSMUSG00000031101/ENSMUSG00000021457/ENSMUSG00000048583/ENSMUSG00000033220/ENSMUSG00000026288/ENSMUSG00000071714/ENSMUSG00000020399/ENSMUSG00000030707/…
GO:0002768	immune response-regulating cell surface receptor signaling pathway	27/222	318/23133	0.0849057	8.8474	13.8704	6.39883e-18	1.05901e-15	7.33807e-16	ENSMUSG00000022126/ENSMUSG00000034116/ENSMUSG00000030786/ENSMUSG00000112148/ENSMUSG00000058715/ENSMUSG00000031264/ENSMUSG00000023992/ENSMUSG00000022488/ENSMUSG00000049130/ENSMUSG00000030579/ENSMUSG00000112023/ENSMUSG00000059498/ENSMUSG00000002699/ENSMUSG00000015947/ENSMUSG00000040552/ENSMUSG00000030144/ENSMUSG00000061132/ENSMUSG00000021457/ENSMUSG00000020437/ENSMUSG00000040751/ENSMUSG00000042190/…
GO:0002444	myeloid leukocyte mediated immunity	19/222	125/23133	0.152	15.8388	16.3748	1.15765e-17	1.81508e-15	1.2577e-15	ENSMUSG00000052336/ENSMUSG00000024300/ENSMUSG00000030786/ENSMUSG00000058715/ENSMUSG00000038147/ENSMUSG00000002111/ENSMUSG00000031264/ENSMUSG00000030579/ENSMUSG00000059498/ENSMUSG00000015950/ENSMUSG00000026656/ENSMUSG00000015947/ENSMUSG00000000290/ENSMUSG00000021457/ENSMUSG00000033220/ENSMUSG00000040528/ENSMUSG00000053158/ENSMUSG00000040751/ENSMUSG00000020681
GO:0050727	regulation of inflammatory response	29/222	397/23133	0.0730479	7.61178	13.0803	2.08075e-17	3.09928e-15	2.14756e-15	ENSMUSG00000030653/ENSMUSG00000062515/ENSMUSG00000052336/ENSMUSG00000022126/ENSMUSG00000110195/ENSMUSG00000024621/ENSMUSG00000058715/ENSMUSG00000031264/ENSMUSG00000023992/ENSMUSG00000020573/ENSMUSG00000021322/ENSMUSG00000060063/ENSMUSG00000038642/ENSMUSG00000059498/ENSMUSG00000015950/ENSMUSG00000026656/ENSMUSG00000015947/ENSMUSG00000002603/ENSMUSG00000037860/ENSMUSG00000034786/ENSMUSG00000030474/…
GO:0002703	regulation of leukocyte mediated immunity	26/222	308/23133	0.0844156	8.79633	13.5588	3.1344e-17	4.44637e-15	3.08098e-15	ENSMUSG00000052336/ENSMUSG00000034116/ENSMUSG00000030786/ENSMUSG00000112148/ENSMUSG00000058715/ENSMUSG00000038147/ENSMUSG00000002111/ENSMUSG00000031264/ENSMUSG00000023992/ENSMUSG00000022488/ENSMUSG00000030579/ENSMUSG00000112023/ENSMUSG00000059498/ENSMUSG00000026656/ENSMUSG00000015947/ENSMUSG00000002603/ENSMUSG00000000290/ENSMUSG00000031101/ENSMUSG00000021457/ENSMUSG00000048583/ENSMUSG00000033220/…
GO:0050867	positive regulation of cell activation	29/222	405/23133	0.0716049	7.46143	12.9133	3.54974e-17	4.80667e-15	3.33064e-15	ENSMUSG00000034116/ENSMUSG00000112148/ENSMUSG00000024621/ENSMUSG00000002111/ENSMUSG00000031264/ENSMUSG00000023992/ENSMUSG00000022488/ENSMUSG00000052142/ENSMUSG00000030579/ENSMUSG00000112023/ENSMUSG00000024397/ENSMUSG00000002603/ENSMUSG00000030144/ENSMUSG00000031101/ENSMUSG00000021457/ENSMUSG00000048583/ENSMUSG00000026288/ENSMUSG00000020399/ENSMUSG00000030707/ENSMUSG00000076617/ENSMUSG00000020120/…
GO:1903555	regulation of tumor necrosis factor superfamily cytokine production	22/222	201/23133	0.109453	11.4053	14.5845	3.96065e-17	5.1299e-15	3.55462e-15	ENSMUSG00000029816/ENSMUSG00000052336/ENSMUSG00000112148/ENSMUSG00000024621/ENSMUSG00000058715/ENSMUSG00000038147/ENSMUSG00000031264/ENSMUSG00000023992/ENSMUSG00000030579/ENSMUSG00000112023/ENSMUSG00000059498/ENSMUSG00000026656/ENSMUSG00000002603/ENSMUSG00000015340/ENSMUSG00000031101/ENSMUSG00000021457/ENSMUSG00000020399/ENSMUSG00000020227/ENSMUSG00000004266/ENSMUSG00000025473/ENSMUSG00000044827/…
GO:0050670	regulation of lymphocyte proliferation	24/222	259/23133	0.0926641	9.65585	13.7895	6.59719e-17	8.18877e-15	5.67417e-15	ENSMUSG00000029816/ENSMUSG00000112148/ENSMUSG00000024621/ENSMUSG00000031264/ENSMUSG00000030798/ENSMUSG00000022488/ENSMUSG00000052142/ENSMUSG00000030579/ENSMUSG00000112023/ENSMUSG00000024397/ENSMUSG00000026656/ENSMUSG00000002603/ENSMUSG00000031101/ENSMUSG00000021457/ENSMUSG00000048583/ENSMUSG00000033220/ENSMUSG00000026288/ENSMUSG00000020399/ENSMUSG00000030707/ENSMUSG00000076617/ENSMUSG00000030830/…
GO:0071706	tumor necrosis factor superfamily cytokine production	22/222	207/23133	0.10628	11.0747	14.3322	7.45789e-17	8.88682e-15	6.15786e-15	ENSMUSG00000029816/ENSMUSG00000052336/ENSMUSG00000112148/ENSMUSG00000024621/ENSMUSG00000058715/ENSMUSG00000038147/ENSMUSG00000031264/ENSMUSG00000023992/ENSMUSG00000030579/ENSMUSG00000112023/ENSMUSG00000059498/ENSMUSG00000026656/ENSMUSG00000002603/ENSMUSG00000015340/ENSMUSG00000031101/ENSMUSG00000021457/ENSMUSG00000020399/ENSMUSG00000020227/ENSMUSG00000004266/ENSMUSG00000025473/ENSMUSG00000044827/…
GO:0032944	regulation of mononuclear cell proliferation	24/222	264/23133	0.0909091	9.47297	13.6294	1.02314e-16	1.17228e-14	8.123e-15	ENSMUSG00000029816/ENSMUSG00000112148/ENSMUSG00000024621/ENSMUSG00000031264/ENSMUSG00000030798/ENSMUSG00000022488/ENSMUSG00000052142/ENSMUSG00000030579/ENSMUSG00000112023/ENSMUSG00000024397/ENSMUSG00000026656/ENSMUSG00000002603/ENSMUSG00000031101/ENSMUSG00000021457/ENSMUSG00000048583/ENSMUSG00000033220/ENSMUSG00000026288/ENSMUSG00000020399/ENSMUSG00000030707/ENSMUSG00000076617/ENSMUSG00000030830/…
GO:0002449	lymphocyte mediated immunity	29/222	423/23133	0.0685579	7.14392	12.5536	1.13013e-16	1.24691e-14	8.64011e-15	ENSMUSG00000034116/ENSMUSG00000058818/ENSMUSG00000112148/ENSMUSG00000036887/ENSMUSG00000058715/ENSMUSG00000026177/ENSMUSG00000031264/ENSMUSG00000023992/ENSMUSG00000022488/ENSMUSG00000112023/ENSMUSG00000071713/ENSMUSG00000059498/ENSMUSG00000026656/ENSMUSG00000015947/ENSMUSG00000002603/ENSMUSG00000031101/ENSMUSG00000048583/ENSMUSG00000026288/ENSMUSG00000071714/ENSMUSG00000020437/ENSMUSG00000020399/…
GO:0032675	regulation of interleukin-6 production	20/222	173/23133	0.115607	12.0466	14.3557	3.84977e-16	3.95841e-14	2.74287e-14	ENSMUSG00000112148/ENSMUSG00000058715/ENSMUSG00000038147/ENSMUSG00000031264/ENSMUSG00000040522/ENSMUSG00000023992/ENSMUSG00000022488/ENSMUSG00000044583/ENSMUSG00000030579/ENSMUSG00000112023/ENSMUSG00000024397/ENSMUSG00000002603/ENSMUSG00000021457/ENSMUSG00000026288/ENSMUSG00000020399/ENSMUSG00000020227/ENSMUSG00000004266/ENSMUSG00000044827/ENSMUSG00000001741/ENSMUSG00000031103
GO:0050729	positive regulation of inflammatory response	19/222	150/23133	0.126667	13.199	14.7546	3.85344e-16	3.95841e-14	2.74287e-14	ENSMUSG00000030653/ENSMUSG00000062515/ENSMUSG00000110195/ENSMUSG00000024621/ENSMUSG00000058715/ENSMUSG00000031264/ENSMUSG00000023992/ENSMUSG00000020573/ENSMUSG00000060063/ENSMUSG00000038642/ENSMUSG00000059498/ENSMUSG00000015947/ENSMUSG00000002603/ENSMUSG00000037860/ENSMUSG00000034786/ENSMUSG00000030560/ENSMUSG00000025473/ENSMUSG00000001741/ENSMUSG00000034708
GO:0032680	regulation of tumor necrosis factor production	21/222	198/23133	0.106061	11.0518	13.9826	4.0413e-16	4.01301e-14	2.7807e-14	ENSMUSG00000029816/ENSMUSG00000052336/ENSMUSG00000112148/ENSMUSG00000024621/ENSMUSG00000058715/ENSMUSG00000038147/ENSMUSG00000031264/ENSMUSG00000023992/ENSMUSG00000030579/ENSMUSG00000112023/ENSMUSG00000059498/ENSMUSG00000026656/ENSMUSG00000002603/ENSMUSG00000015340/ENSMUSG00000031101/ENSMUSG00000021457/ENSMUSG00000020399/ENSMUSG00000020227/ENSMUSG00000004266/ENSMUSG00000044827/ENSMUSG00000031103
GO:0006911	phagocytosis, engulfment	14/222	61/23133	0.229508	23.9154	17.6405	5.62283e-16	5.40336e-14	3.7441e-14	ENSMUSG00000026390/ENSMUSG00000030786/ENSMUSG00000058715/ENSMUSG00000023992/ENSMUSG00000025044/ENSMUSG00000022488/ENSMUSG00000059498/ENSMUSG00000024397/ENSMUSG00000026656/ENSMUSG00000015947/ENSMUSG00000000290/ENSMUSG00000098112/ENSMUSG00000030047/ENSMUSG00000030474
GO:0002696	positive regulation of leukocyte activation	27/222	381/23133	0.0708661	7.38444	12.3691	6.0719e-16	5.65256e-14	3.91677e-14	ENSMUSG00000034116/ENSMUSG00000112148/ENSMUSG00000024621/ENSMUSG00000002111/ENSMUSG00000031264/ENSMUSG00000023992/ENSMUSG00000022488/ENSMUSG00000052142/ENSMUSG00000030579/ENSMUSG00000112023/ENSMUSG00000024397/ENSMUSG00000002603/ENSMUSG00000030144/ENSMUSG00000031101/ENSMUSG00000021457/ENSMUSG00000048583/ENSMUSG00000026288/ENSMUSG00000020399/ENSMUSG00000030707/ENSMUSG00000076617/ENSMUSG00000052085/…
GO:0032640	tumor necrosis factor production	21/222	204/23133	0.102941	10.7267	13.7357	7.43909e-16	6.71547e-14	4.65329e-14	ENSMUSG00000029816/ENSMUSG00000052336/ENSMUSG00000112148/ENSMUSG00000024621/ENSMUSG00000058715/ENSMUSG00000038147/ENSMUSG00000031264/ENSMUSG00000023992/ENSMUSG00000030579/ENSMUSG00000112023/ENSMUSG00000059498/ENSMUSG00000026656/ENSMUSG00000002603/ENSMUSG00000015340/ENSMUSG00000031101/ENSMUSG00000021457/ENSMUSG00000020399/ENSMUSG00000020227/ENSMUSG00000004266/ENSMUSG00000044827/ENSMUSG00000031103
GO:0032635	interleukin-6 production	20/222	182/23133	0.10989	11.4508	13.9331	1.04384e-15	9.14588e-14	6.33737e-14	ENSMUSG00000112148/ENSMUSG00000058715/ENSMUSG00000038147/ENSMUSG00000031264/ENSMUSG00000040522/ENSMUSG00000023992/ENSMUSG00000022488/ENSMUSG00000044583/ENSMUSG00000030579/ENSMUSG00000112023/ENSMUSG00000024397/ENSMUSG00000002603/ENSMUSG00000021457/ENSMUSG00000026288/ENSMUSG00000020399/ENSMUSG00000020227/ENSMUSG00000004266/ENSMUSG00000044827/ENSMUSG00000001741/ENSMUSG00000031103
GO:0002460	adaptive immune response based on somatic recombination of immune receptors built from immunoglobulin superfamily domains	28/222	435/23133	0.0643678	6.7073	11.8289	1.9695e-15	1.67633e-13	1.16156e-13	ENSMUSG00000004707/ENSMUSG00000058818/ENSMUSG00000112148/ENSMUSG00000036887/ENSMUSG00000058715/ENSMUSG00000026177/ENSMUSG00000031264/ENSMUSG00000023992/ENSMUSG00000022488/ENSMUSG00000112023/ENSMUSG00000071713/ENSMUSG00000059498/ENSMUSG00000026656/ENSMUSG00000015947/ENSMUSG00000002603/ENSMUSG00000040552/ENSMUSG00000031101/ENSMUSG00000026288/ENSMUSG00000071714/ENSMUSG00000020437/ENSMUSG00000020399/…
GO:0097529	myeloid leukocyte migration	22/222	248/23133	0.0887097	9.24379	12.8481	3.43607e-15	2.84334e-13	1.97021e-13	ENSMUSG00000052336/ENSMUSG00000024300/ENSMUSG00000034116/ENSMUSG00000030786/ENSMUSG00000024621/ENSMUSG00000058715/ENSMUSG00000002111/ENSMUSG00000023992/ENSMUSG00000022488/ENSMUSG00000049130/ENSMUSG00000059498/ENSMUSG00000024397/ENSMUSG00000040552/ENSMUSG00000000290/ENSMUSG00000021457/ENSMUSG00000017737/ENSMUSG00000033220/ENSMUSG00000019122/ENSMUSG00000029304/ENSMUSG00000042190/ENSMUSG00000018927/…
GO:0099024	plasma membrane invagination	14/222	70/23133	0.2	20.8405	16.3646	4.47395e-15	3.60213e-13	2.49599e-13	ENSMUSG00000026390/ENSMUSG00000030786/ENSMUSG00000058715/ENSMUSG00000023992/ENSMUSG00000025044/ENSMUSG00000022488/ENSMUSG00000059498/ENSMUSG00000024397/ENSMUSG00000026656/ENSMUSG00000015947/ENSMUSG00000000290/ENSMUSG00000098112/ENSMUSG00000030047/ENSMUSG00000030474
GO:0001818	negative regulation of cytokine production	24/222	316/23133	0.0759494	7.91413	12.1818	5.9581e-15	4.67083e-13	3.23652e-13	ENSMUSG00000027322/ENSMUSG00000029816/ENSMUSG00000052336/ENSMUSG00000022126/ENSMUSG00000112148/ENSMUSG00000022548/ENSMUSG00000038147/ENSMUSG00000026177/ENSMUSG00000031264/ENSMUSG00000040522/ENSMUSG00000023992/ENSMUSG00000022488/ENSMUSG00000030579/ENSMUSG00000112023/ENSMUSG00000026656/ENSMUSG00000002603/ENSMUSG00000026288/ENSMUSG00000020399/ENSMUSG00000020227/ENSMUSG00000042190/ENSMUSG00000031659/…
GO:0045088	regulation of innate immune response	29/222	494/23133	0.0587045	6.11716	11.3168	6.55275e-15	5.0053e-13	3.46827e-13	ENSMUSG00000044811/ENSMUSG00000022126/ENSMUSG00000024300/ENSMUSG00000034116/ENSMUSG00000002111/ENSMUSG00000031264/ENSMUSG00000040522/ENSMUSG00000023992/ENSMUSG00000033777/ENSMUSG00000044583/ENSMUSG00000030579/ENSMUSG00000015950/ENSMUSG00000002603/ENSMUSG00000073490/ENSMUSG00000021457/ENSMUSG00000048583/ENSMUSG00000037860/ENSMUSG00000039997/ENSMUSG00000020399/ENSMUSG00000020227/ENSMUSG00000025017/…
GO:0002429	immune response-activating cell surface receptor signaling pathway	23/222	300/23133	0.0766667	7.98887	11.9935	1.84513e-14	1.37416e-12	9.52185e-13	ENSMUSG00000022126/ENSMUSG00000030786/ENSMUSG00000112148/ENSMUSG00000058715/ENSMUSG00000031264/ENSMUSG00000023992/ENSMUSG00000022488/ENSMUSG00000049130/ENSMUSG00000030579/ENSMUSG00000112023/ENSMUSG00000002699/ENSMUSG00000040552/ENSMUSG00000061132/ENSMUSG00000021457/ENSMUSG00000020437/ENSMUSG00000040751/ENSMUSG00000042190/ENSMUSG00000076617/ENSMUSG00000025017/ENSMUSG00000004266/ENSMUSG00000022148/…
GO:0042116	macrophage activation	16/222	115/23133	0.13913	14.4978	14.2836	1.94528e-14	1.41341e-12	9.7938e-13	ENSMUSG00000052336/ENSMUSG00000030786/ENSMUSG00000036887/ENSMUSG00000024621/ENSMUSG00000038147/ENSMUSG00000026177/ENSMUSG00000023992/ENSMUSG00000049130/ENSMUSG00000030579/ENSMUSG00000024397/ENSMUSG00000021457/ENSMUSG00000020399/ENSMUSG00000030560/ENSMUSG00000079685/ENSMUSG00000044827/ENSMUSG00000034708
GO:0010324	membrane invagination	14/222	78/23133	0.179487	18.703	15.4161	2.21538e-14	1.57134e-12	1.08881e-12	ENSMUSG00000026390/ENSMUSG00000030786/ENSMUSG00000058715/ENSMUSG00000023992/ENSMUSG00000025044/ENSMUSG00000022488/ENSMUSG00000059498/ENSMUSG00000024397/ENSMUSG00000026656/ENSMUSG00000015947/ENSMUSG00000000290/ENSMUSG00000098112/ENSMUSG00000030047/ENSMUSG00000030474
GO:0007159	leukocyte cell-cell adhesion	26/222	432/23133	0.0601852	6.27146	10.8871	1.01949e-13	7.06292e-12	4.89405e-12	ENSMUSG00000029816/ENSMUSG00000052336/ENSMUSG00000034116/ENSMUSG00000030786/ENSMUSG00000112148/ENSMUSG00000030798/ENSMUSG00000022488/ENSMUSG00000052142/ENSMUSG00000112023/ENSMUSG00000024397/ENSMUSG00000002603/ENSMUSG00000000290/ENSMUSG00000024965/ENSMUSG00000031101/ENSMUSG00000021457/ENSMUSG00000048583/ENSMUSG00000033220/ENSMUSG00000020399/ENSMUSG00000030707/ENSMUSG00000052085/ENSMUSG00000030830/…
GO:0002886	regulation of myeloid leukocyte mediated immunity	13/222	70/23133	0.185714	19.3519	15.1368	1.20569e-13	8.16304e-12	5.65634e-12	ENSMUSG00000052336/ENSMUSG00000030786/ENSMUSG00000058715/ENSMUSG00000038147/ENSMUSG00000002111/ENSMUSG00000031264/ENSMUSG00000030579/ENSMUSG00000059498/ENSMUSG00000015947/ENSMUSG00000000290/ENSMUSG00000021457/ENSMUSG00000033220/ENSMUSG00000053158
GO:0045576	mast cell activation	14/222	90/23133	0.155556	16.2093	14.2306	1.76772e-13	1.17023e-11	8.10878e-12	ENSMUSG00000112148/ENSMUSG00000058715/ENSMUSG00000038147/ENSMUSG00000031264/ENSMUSG00000015355/ENSMUSG00000112023/ENSMUSG00000059498/ENSMUSG00000002699/ENSMUSG00000021457/ENSMUSG00000033220/ENSMUSG00000040528/ENSMUSG00000053158/ENSMUSG00000040751/ENSMUSG00000004266
GO:0043299	leukocyte degranulation	14/222	91/23133	0.153846	16.0312	14.1421	2.07158e-13	1.34158e-11	9.29605e-12	ENSMUSG00000024300/ENSMUSG00000030786/ENSMUSG00000058715/ENSMUSG00000038147/ENSMUSG00000002111/ENSMUSG00000031264/ENSMUSG00000022488/ENSMUSG00000000290/ENSMUSG00000021457/ENSMUSG00000033220/ENSMUSG00000040528/ENSMUSG00000053158/ENSMUSG00000040751/ENSMUSG00000030707
GO:0051251	positive regulation of lymphocyte activation	23/222	344/23133	0.0668605	6.96704	10.9758	3.33186e-13	2.11183e-11	1.46333e-11	ENSMUSG00000034116/ENSMUSG00000112148/ENSMUSG00000024621/ENSMUSG00000002111/ENSMUSG00000031264/ENSMUSG00000022488/ENSMUSG00000052142/ENSMUSG00000030579/ENSMUSG00000112023/ENSMUSG00000024397/ENSMUSG00000002603/ENSMUSG00000031101/ENSMUSG00000021457/ENSMUSG00000048583/ENSMUSG00000026288/ENSMUSG00000020399/ENSMUSG00000030707/ENSMUSG00000076617/ENSMUSG00000052085/ENSMUSG00000030830/ENSMUSG00000079685/…
GO:0097530	granulocyte migration	17/222	163/23133	0.104294	10.8678	12.445	3.73895e-13	2.32048e-11	1.60791e-11	ENSMUSG00000024300/ENSMUSG00000034116/ENSMUSG00000030786/ENSMUSG00000024621/ENSMUSG00000058715/ENSMUSG00000022488/ENSMUSG00000049130/ENSMUSG00000059498/ENSMUSG00000040552/ENSMUSG00000000290/ENSMUSG00000021457/ENSMUSG00000033220/ENSMUSG00000019122/ENSMUSG00000029304/ENSMUSG00000042190/ENSMUSG00000018927/ENSMUSG00000025473
GO:0002833	positive regulation of response to biotic stimulus	25/222	431/23133	0.0580046	6.04424	10.4055	7.11684e-13	4.32675e-11	2.99809e-11	ENSMUSG00000022126/ENSMUSG00000034116/ENSMUSG00000002111/ENSMUSG00000031264/ENSMUSG00000040522/ENSMUSG00000023992/ENSMUSG00000033777/ENSMUSG00000044583/ENSMUSG00000021423/ENSMUSG00000030579/ENSMUSG00000073490/ENSMUSG00000021457/ENSMUSG00000021624/ENSMUSG00000037860/ENSMUSG00000039997/ENSMUSG00000020399/ENSMUSG00000020227/ENSMUSG00000025017/ENSMUSG00000090272/ENSMUSG00000079685/ENSMUSG00000025473/…
GO:0042129	regulation of T cell proliferation	18/222	200/23133	0.09	9.37824	11.7138	9.52243e-13	5.67346e-11	3.93126e-11	ENSMUSG00000029816/ENSMUSG00000112148/ENSMUSG00000030798/ENSMUSG00000022488/ENSMUSG00000052142/ENSMUSG00000112023/ENSMUSG00000024397/ENSMUSG00000002603/ENSMUSG00000031101/ENSMUSG00000021457/ENSMUSG00000048583/ENSMUSG00000033220/ENSMUSG00000020399/ENSMUSG00000030707/ENSMUSG00000030830/ENSMUSG00000004266/ENSMUSG00000047810/ENSMUSG00000090958
GO:0002687	positive regulation of leukocyte migration	17/222	175/23133	0.0971429	10.1225	11.9242	1.20194e-12	7.02074e-11	4.86481e-11	ENSMUSG00000052336/ENSMUSG00000024300/ENSMUSG00000024621/ENSMUSG00000002111/ENSMUSG00000023992/ENSMUSG00000022488/ENSMUSG00000049130/ENSMUSG00000024397/ENSMUSG00000002603/ENSMUSG00000040552/ENSMUSG00000017737/ENSMUSG00000033220/ENSMUSG00000042190/ENSMUSG00000030707/ENSMUSG00000052085/ENSMUSG00000034786/ENSMUSG00000025473
GO:0001909	leukocyte mediated cytotoxicity	17/222	177/23133	0.0960452	10.0082	11.8423	1.44721e-12	8.29083e-11	5.74489e-11	ENSMUSG00000052336/ENSMUSG00000034116/ENSMUSG00000030786/ENSMUSG00000002111/ENSMUSG00000022488/ENSMUSG00000030579/ENSMUSG00000059498/ENSMUSG00000015950/ENSMUSG00000026656/ENSMUSG00000015947/ENSMUSG00000002603/ENSMUSG00000048583/ENSMUSG00000020399/ENSMUSG00000030707/ENSMUSG00000004266/ENSMUSG00000030560/ENSMUSG00000079685
GO:0001774	microglial cell activation	11/222	51/23133	0.215686	22.4751	15.1128	1.68657e-12	9.47982e-11	6.56876e-11	ENSMUSG00000052336/ENSMUSG00000030786/ENSMUSG00000036887/ENSMUSG00000024621/ENSMUSG00000023992/ENSMUSG00000049130/ENSMUSG00000030579/ENSMUSG00000024397/ENSMUSG00000030560/ENSMUSG00000044827/ENSMUSG00000034708
GO:0002532	production of molecular mediator involved in inflammatory response	14/222	107/23133	0.130841	13.634	12.8939	2.06095e-12	1.13696e-10	7.87821e-11	ENSMUSG00000112148/ENSMUSG00000022548/ENSMUSG00000058715/ENSMUSG00000031264/ENSMUSG00000023992/ENSMUSG00000060063/ENSMUSG00000112023/ENSMUSG00000052160/ENSMUSG00000015950/ENSMUSG00000021457/ENSMUSG00000031659/ENSMUSG00000034786/ENSMUSG00000025701/ENSMUSG00000034708
GO:0071621	granulocyte chemotaxis	15/222	132/23133	0.113636	11.8412	12.2957	2.68233e-12	1.45285e-10	1.00671e-10	ENSMUSG00000034116/ENSMUSG00000030786/ENSMUSG00000024621/ENSMUSG00000058715/ENSMUSG00000022488/ENSMUSG00000049130/ENSMUSG00000059498/ENSMUSG00000040552/ENSMUSG00000000290/ENSMUSG00000021457/ENSMUSG00000033220/ENSMUSG00000019122/ENSMUSG00000029304/ENSMUSG00000042190/ENSMUSG00000018927
GO:0002269	leukocyte activation involved in inflammatory response	11/222	55/23133	0.2	20.8405	14.501	4.09738e-12	2.17966e-10	1.51033e-10	ENSMUSG00000052336/ENSMUSG00000030786/ENSMUSG00000036887/ENSMUSG00000024621/ENSMUSG00000023992/ENSMUSG00000049130/ENSMUSG00000030579/ENSMUSG00000024397/ENSMUSG00000030560/ENSMUSG00000044827/ENSMUSG00000034708
GO:0071674	mononuclear cell migration	18/222	221/23133	0.081448	8.4871	11.0088	5.19884e-12	2.71708e-10	1.88272e-10	ENSMUSG00000052336/ENSMUSG00000050370/ENSMUSG00000022548/ENSMUSG00000024621/ENSMUSG00000002111/ENSMUSG00000023992/ENSMUSG00000049130/ENSMUSG00000024397/ENSMUSG00000002603/ENSMUSG00000040552/ENSMUSG00000017737/ENSMUSG00000020437/ENSMUSG00000042190/ENSMUSG00000030707/ENSMUSG00000052085/ENSMUSG00000030830/ENSMUSG00000025473/ENSMUSG00000025701
GO:0050777	negative regulation of immune response	18/222	222/23133	0.0810811	8.44887	10.9776	5.61011e-12	2.88147e-10	1.99663e-10	ENSMUSG00000022126/ENSMUSG00000112148/ENSMUSG00000002111/ENSMUSG00000023992/ENSMUSG00000022488/ENSMUSG00000112023/ENSMUSG00000026656/ENSMUSG00000002603/ENSMUSG00000073490/ENSMUSG00000048583/ENSMUSG00000026288/ENSMUSG00000039997/ENSMUSG00000020399/ENSMUSG00000020227/ENSMUSG00000090272/ENSMUSG00000004266/ENSMUSG00000028369/ENSMUSG00000034708
GO:0002573	myeloid leukocyte differentiation	20/222	289/23133	0.0692042	7.21126	10.4593	6.65844e-12	3.36195e-10	2.32956e-10	ENSMUSG00000030786/ENSMUSG00000058818/ENSMUSG00000112148/ENSMUSG00000024621/ENSMUSG00000058715/ENSMUSG00000002111/ENSMUSG00000093938/ENSMUSG00000023992/ENSMUSG00000030579/ENSMUSG00000112023/ENSMUSG00000002603/ENSMUSG00000022831/ENSMUSG00000073490/ENSMUSG00000019122/ENSMUSG00000026288/ENSMUSG00000053158/ENSMUSG00000039997/ENSMUSG00000052384/ENSMUSG00000090272/ENSMUSG00000025473
GO:0050764	regulation of phagocytosis	14/222	120/23133	0.116667	12.157	12.0618	1.01656e-11	5.0472e-10	3.49731e-10	ENSMUSG00000058715/ENSMUSG00000026177/ENSMUSG00000031264/ENSMUSG00000023992/ENSMUSG00000022488/ENSMUSG00000059498/ENSMUSG00000026656/ENSMUSG00000015947/ENSMUSG00000002603/ENSMUSG00000021457/ENSMUSG00000030474/ENSMUSG00000001128/ENSMUSG00000020143/ENSMUSG00000003283
GO:1903557	positive regulation of tumor necrosis factor superfamily cytokine production	14/222	122/23133	0.114754	11.9577	11.9452	1.27686e-11	6.2357e-10	4.32084e-10	ENSMUSG00000024621/ENSMUSG00000058715/ENSMUSG00000038147/ENSMUSG00000031264/ENSMUSG00000030579/ENSMUSG00000059498/ENSMUSG00000026656/ENSMUSG00000002603/ENSMUSG00000015340/ENSMUSG00000031101/ENSMUSG00000021457/ENSMUSG00000020399/ENSMUSG00000025473/ENSMUSG00000044827
GO:0061900	glial cell activation	11/222	61/23133	0.180328	18.7907	13.6954	1.36141e-11	6.54133e-10	4.53262e-10	ENSMUSG00000052336/ENSMUSG00000030786/ENSMUSG00000036887/ENSMUSG00000024621/ENSMUSG00000023992/ENSMUSG00000049130/ENSMUSG00000030579/ENSMUSG00000024397/ENSMUSG00000030560/ENSMUSG00000044827/ENSMUSG00000034708
GO:0070665	positive regulation of leukocyte proliferation	16/222	175/23133	0.0914286	9.5271	11.1459	1.42794e-11	6.75214e-10	4.6787e-10	ENSMUSG00000024621/ENSMUSG00000031264/ENSMUSG00000022488/ENSMUSG00000052142/ENSMUSG00000071713/ENSMUSG00000024397/ENSMUSG00000031101/ENSMUSG00000021457/ENSMUSG00000048583/ENSMUSG00000033220/ENSMUSG00000071714/ENSMUSG00000020399/ENSMUSG00000030707/ENSMUSG00000076617/ENSMUSG00000030830/ENSMUSG00000047810
GO:0002704	negative regulation of leukocyte mediated immunity	12/222	82/23133	0.146341	15.2492	12.7237	2.07837e-11	9.67416e-10	6.70342e-10	ENSMUSG00000052336/ENSMUSG00000112148/ENSMUSG00000038147/ENSMUSG00000002111/ENSMUSG00000022488/ENSMUSG00000112023/ENSMUSG00000026656/ENSMUSG00000002603/ENSMUSG00000048583/ENSMUSG00000020399/ENSMUSG00000004266/ENSMUSG00000028369
GO:0001906	cell killing	19/222	277/23133	0.0685921	7.14748	10.1321	2.66685e-11	1.22224e-09	8.46914e-10	ENSMUSG00000069516/ENSMUSG00000052336/ENSMUSG00000034116/ENSMUSG00000030786/ENSMUSG00000002111/ENSMUSG00000022488/ENSMUSG00000030579/ENSMUSG00000059498/ENSMUSG00000015950/ENSMUSG00000026656/ENSMUSG00000015947/ENSMUSG00000002603/ENSMUSG00000021457/ENSMUSG00000048583/ENSMUSG00000020399/ENSMUSG00000030707/ENSMUSG00000004266/ENSMUSG00000030560/ENSMUSG00000079685
GO:0002699	positive regulation of immune effector process	20/222	314/23133	0.0636943	6.63711	9.89998	2.99581e-11	1.3522e-09	9.36966e-10	ENSMUSG00000034116/ENSMUSG00000030786/ENSMUSG00000112148/ENSMUSG00000058715/ENSMUSG00000002111/ENSMUSG00000031264/ENSMUSG00000023992/ENSMUSG00000030798/ENSMUSG00000044583/ENSMUSG00000030579/ENSMUSG00000059498/ENSMUSG00000015947/ENSMUSG00000002603/ENSMUSG00000000290/ENSMUSG00000031101/ENSMUSG00000021457/ENSMUSG00000029771/ENSMUSG00000004266/ENSMUSG00000001128/ENSMUSG00000079685
GO:1903037	regulation of leukocyte cell-cell adhesion	22/222	392/23133	0.0561224	5.84811	9.52954	3.49065e-11	1.55204e-09	1.07544e-09	ENSMUSG00000029816/ENSMUSG00000034116/ENSMUSG00000112148/ENSMUSG00000030798/ENSMUSG00000022488/ENSMUSG00000052142/ENSMUSG00000112023/ENSMUSG00000024397/ENSMUSG00000002603/ENSMUSG00000000290/ENSMUSG00000031101/ENSMUSG00000021457/ENSMUSG00000048583/ENSMUSG00000020399/ENSMUSG00000030707/ENSMUSG00000052085/ENSMUSG00000030830/ENSMUSG00000004266/ENSMUSG00000025473/ENSMUSG00000047810/ENSMUSG00000090958/…
GO:0002685	regulation of leukocyte migration	18/222	252/23133	0.0714286	7.44305	10.1231	4.65122e-11	2.02695e-09	1.40452e-09	ENSMUSG00000052336/ENSMUSG00000024300/ENSMUSG00000022548/ENSMUSG00000024621/ENSMUSG00000002111/ENSMUSG00000023992/ENSMUSG00000022488/ENSMUSG00000049130/ENSMUSG00000024397/ENSMUSG00000002603/ENSMUSG00000040552/ENSMUSG00000017737/ENSMUSG00000033220/ENSMUSG00000042190/ENSMUSG00000030707/ENSMUSG00000052085/ENSMUSG00000034786/ENSMUSG00000025473
GO:1902107	positive regulation of leukocyte differentiation	17/222	220/23133	0.0772727	8.05203	10.3454	4.76289e-11	2.02695e-09	1.40452e-09	ENSMUSG00000030786/ENSMUSG00000112148/ENSMUSG00000024621/ENSMUSG00000002111/ENSMUSG00000093938/ENSMUSG00000023992/ENSMUSG00000022488/ENSMUSG00000030579/ENSMUSG00000112023/ENSMUSG00000002603/ENSMUSG00000022831/ENSMUSG00000031101/ENSMUSG00000021457/ENSMUSG00000019122/ENSMUSG00000026288/ENSMUSG00000053158/ENSMUSG00000025473
GO:1903708	positive regulation of hemopoiesis	17/222	220/23133	0.0772727	8.05203	10.3454	4.76289e-11	2.02695e-09	1.40452e-09	ENSMUSG00000030786/ENSMUSG00000112148/ENSMUSG00000024621/ENSMUSG00000002111/ENSMUSG00000093938/ENSMUSG00000023992/ENSMUSG00000022488/ENSMUSG00000030579/ENSMUSG00000112023/ENSMUSG00000002603/ENSMUSG00000022831/ENSMUSG00000031101/ENSMUSG00000021457/ENSMUSG00000019122/ENSMUSG00000026288/ENSMUSG00000053158/ENSMUSG00000025473
GO:0045089	positive regulation of innate immune response	22/222	401/23133	0.0548628	5.71686	9.37923	5.40724e-11	2.26876e-09	1.57207e-09	ENSMUSG00000022126/ENSMUSG00000034116/ENSMUSG00000002111/ENSMUSG00000031264/ENSMUSG00000040522/ENSMUSG00000023992/ENSMUSG00000033777/ENSMUSG00000044583/ENSMUSG00000030579/ENSMUSG00000073490/ENSMUSG00000021457/ENSMUSG00000037860/ENSMUSG00000039997/ENSMUSG00000020399/ENSMUSG00000020227/ENSMUSG00000025017/ENSMUSG00000090272/ENSMUSG00000079685/ENSMUSG00000025473/ENSMUSG00000039316/ENSMUSG00000044827/…
GO:0045637	regulation of myeloid cell differentiation	17/222	234/23133	0.0726496	7.57028	9.94362	1.25595e-10	5.19649e-09	3.60075e-09	ENSMUSG00000030786/ENSMUSG00000112148/ENSMUSG00000024621/ENSMUSG00000002111/ENSMUSG00000093938/ENSMUSG00000023992/ENSMUSG00000022488/ENSMUSG00000030579/ENSMUSG00000112023/ENSMUSG00000002603/ENSMUSG00000022831/ENSMUSG00000019122/ENSMUSG00000026288/ENSMUSG00000053158/ENSMUSG00000032698/ENSMUSG00000025473/ENSMUSG00000024529
GO:0032760	positive regulation of tumor necrosis factor production	13/222	120/23133	0.108333	11.2886	11.123	1.45991e-10	5.95762e-09	4.12815e-09	ENSMUSG00000024621/ENSMUSG00000058715/ENSMUSG00000038147/ENSMUSG00000031264/ENSMUSG00000030579/ENSMUSG00000059498/ENSMUSG00000026656/ENSMUSG00000002603/ENSMUSG00000015340/ENSMUSG00000031101/ENSMUSG00000021457/ENSMUSG00000020399/ENSMUSG00000044827
GO:0050672	negative regulation of lymphocyte proliferation	12/222	97/23133	0.123711	12.8911	11.5522	1.57633e-10	6.34579e-09	4.39713e-09	ENSMUSG00000029816/ENSMUSG00000112148/ENSMUSG00000031264/ENSMUSG00000030798/ENSMUSG00000030579/ENSMUSG00000112023/ENSMUSG00000026656/ENSMUSG00000002603/ENSMUSG00000026288/ENSMUSG00000020399/ENSMUSG00000004266/ENSMUSG00000090958
GO:1990266	neutrophil migration	13/222	121/23133	0.107438	11.1953	11.0682	1.62191e-10	6.41459e-09	4.4448e-09	ENSMUSG00000024300/ENSMUSG00000034116/ENSMUSG00000030786/ENSMUSG00000058715/ENSMUSG00000022488/ENSMUSG00000049130/ENSMUSG00000059498/ENSMUSG00000040552/ENSMUSG00000000290/ENSMUSG00000021457/ENSMUSG00000033220/ENSMUSG00000029304/ENSMUSG00000025473
GO:0002706	regulation of lymphocyte mediated immunity	17/222	238/23133	0.0714286	7.44305	9.83492	1.63648e-10	6.41459e-09	4.4448e-09	ENSMUSG00000034116/ENSMUSG00000112148/ENSMUSG00000058715/ENSMUSG00000031264/ENSMUSG00000023992/ENSMUSG00000022488/ENSMUSG00000112023/ENSMUSG00000059498/ENSMUSG00000026656/ENSMUSG00000015947/ENSMUSG00000002603/ENSMUSG00000031101/ENSMUSG00000048583/ENSMUSG00000020399/ENSMUSG00000004266/ENSMUSG00000079685/ENSMUSG00000028369
GO:0002888	positive regulation of myeloid leukocyte mediated immunity	8/222	28/23133	0.285714	29.7722	14.9955	1.67066e-10	6.46349e-09	4.47868e-09	ENSMUSG00000030786/ENSMUSG00000058715/ENSMUSG00000002111/ENSMUSG00000031264/ENSMUSG00000030579/ENSMUSG00000059498/ENSMUSG00000015947/ENSMUSG00000000290
GO:0042742	defense response to bacterium	21/222	386/23133	0.0544041	5.66906	9.10588	1.76603e-10	6.74488e-09	4.67366e-09	ENSMUSG00000042286/ENSMUSG00000069516/ENSMUSG00000024300/ENSMUSG00000058715/ENSMUSG00000026177/ENSMUSG00000023992/ENSMUSG00000049130/ENSMUSG00000015950/ENSMUSG00000015947/ENSMUSG00000030144/ENSMUSG00000021457/ENSMUSG00000069792/ENSMUSG00000020399/ENSMUSG00000041515/ENSMUSG00000046805/ENSMUSG00000076617/ENSMUSG00000003283/ENSMUSG00000006403/ENSMUSG00000078945/ENSMUSG00000036103/ENSMUSG00000034708
GO:0002698	negative regulation of immune effector process	14/222	149/23133	0.0939597	9.79086	10.5967	1.93106e-10	7.2818e-09	5.04571e-09	ENSMUSG00000052336/ENSMUSG00000112148/ENSMUSG00000038147/ENSMUSG00000002111/ENSMUSG00000022488/ENSMUSG00000112023/ENSMUSG00000026656/ENSMUSG00000002603/ENSMUSG00000048583/ENSMUSG00000020399/ENSMUSG00000020227/ENSMUSG00000004266/ENSMUSG00000028369/ENSMUSG00000034708
GO:0032652	regulation of interleukin-1 production	13/222	123/23133	0.105691	11.0133	10.9605	1.99598e-10	7.39215e-09	5.12218e-09	ENSMUSG00000052336/ENSMUSG00000112148/ENSMUSG00000040522/ENSMUSG00000023992/ENSMUSG00000030579/ENSMUSG00000112023/ENSMUSG00000073490/ENSMUSG00000037860/ENSMUSG00000039997/ENSMUSG00000020399/ENSMUSG00000090272/ENSMUSG00000001741/ENSMUSG00000031103
GO:0032945	negative regulation of mononuclear cell proliferation	12/222	99/23133	0.121212	12.6306	11.4156	2.00995e-10	7.39215e-09	5.12218e-09	ENSMUSG00000029816/ENSMUSG00000112148/ENSMUSG00000031264/ENSMUSG00000030798/ENSMUSG00000030579/ENSMUSG00000112023/ENSMUSG00000026656/ENSMUSG00000002603/ENSMUSG00000026288/ENSMUSG00000020399/ENSMUSG00000004266/ENSMUSG00000090958
GO:0002237	response to molecule of bacterial origin	23/222	476/23133	0.0483193	5.035	8.75603	2.39449e-10	8.69899e-09	6.02771e-09	ENSMUSG00000030653/ENSMUSG00000026712/ENSMUSG00000052336/ENSMUSG00000022126/ENSMUSG00000112148/ENSMUSG00000110195/ENSMUSG00000038147/ENSMUSG00000002111/ENSMUSG00000026177/ENSMUSG00000031264/ENSMUSG00000023992/ENSMUSG00000049130/ENSMUSG00000021423/ENSMUSG00000026656/ENSMUSG00000018774/ENSMUSG00000021624/ENSMUSG00000020399/ENSMUSG00000020227/ENSMUSG00000041515/ENSMUSG00000026480/ENSMUSG00000029771/…
GO:0042119	neutrophil activation	9/222	43/23133	0.209302	21.8099	13.4447	2.49353e-10	8.94967e-09	6.20141e-09	ENSMUSG00000024300/ENSMUSG00000030786/ENSMUSG00000058715/ENSMUSG00000002111/ENSMUSG00000030579/ENSMUSG00000000290/ENSMUSG00000021457/ENSMUSG00000001741/ENSMUSG00000034708
GO:0050863	regulation of T cell activation	21/222	395/23133	0.0531646	5.53989	8.95837	2.69118e-10	9.54407e-09	6.61328e-09	ENSMUSG00000029816/ENSMUSG00000034116/ENSMUSG00000112148/ENSMUSG00000030798/ENSMUSG00000022488/ENSMUSG00000052142/ENSMUSG00000112023/ENSMUSG00000024397/ENSMUSG00000002603/ENSMUSG00000031101/ENSMUSG00000021457/ENSMUSG00000048583/ENSMUSG00000033220/ENSMUSG00000020399/ENSMUSG00000030707/ENSMUSG00000052085/ENSMUSG00000030830/ENSMUSG00000004266/ENSMUSG00000025473/ENSMUSG00000047810/ENSMUSG00000090958
GO:1903039	positive regulation of leukocyte cell-cell adhesion	18/222	284/23133	0.0633803	6.6044	9.35439	3.28129e-10	1.14999e-08	7.96855e-09	ENSMUSG00000034116/ENSMUSG00000112148/ENSMUSG00000022488/ENSMUSG00000052142/ENSMUSG00000112023/ENSMUSG00000024397/ENSMUSG00000002603/ENSMUSG00000000290/ENSMUSG00000031101/ENSMUSG00000021457/ENSMUSG00000048583/ENSMUSG00000020399/ENSMUSG00000030707/ENSMUSG00000052085/ENSMUSG00000030830/ENSMUSG00000025473/ENSMUSG00000047810/ENSMUSG00000025701
GO:0032612	interleukin-1 production	13/222	129/23133	0.100775	10.501	10.6519	3.63774e-10	1.2601e-08	8.73146e-09	ENSMUSG00000052336/ENSMUSG00000112148/ENSMUSG00000040522/ENSMUSG00000023992/ENSMUSG00000030579/ENSMUSG00000112023/ENSMUSG00000073490/ENSMUSG00000037860/ENSMUSG00000039997/ENSMUSG00000020399/ENSMUSG00000090272/ENSMUSG00000001741/ENSMUSG00000031103
GO:0019724	B cell mediated immunity	16/222	218/23133	0.0733945	7.6479	9.70765	3.85426e-10	1.31975e-08	9.14484e-09	ENSMUSG00000058818/ENSMUSG00000036887/ENSMUSG00000058715/ENSMUSG00000031264/ENSMUSG00000023992/ENSMUSG00000071713/ENSMUSG00000059498/ENSMUSG00000026656/ENSMUSG00000015947/ENSMUSG00000002603/ENSMUSG00000026288/ENSMUSG00000071714/ENSMUSG00000076617/ENSMUSG00000030745/ENSMUSG00000004266/ENSMUSG00000028369
GO:0070664	negative regulation of leukocyte proliferation	12/222	105/23133	0.114286	11.9089	11.0283	4.03484e-10	1.36588e-08	9.4645e-09	ENSMUSG00000029816/ENSMUSG00000112148/ENSMUSG00000031264/ENSMUSG00000030798/ENSMUSG00000030579/ENSMUSG00000112023/ENSMUSG00000026656/ENSMUSG00000002603/ENSMUSG00000026288/ENSMUSG00000020399/ENSMUSG00000004266/ENSMUSG00000090958
GO:0019882	antigen processing and presentation	13/222	131/23133	0.0992366	10.3407	10.5535	4.41227e-10	1.47687e-08	1.02335e-08	ENSMUSG00000058715/ENSMUSG00000026177/ENSMUSG00000051506/ENSMUSG00000023992/ENSMUSG00000038642/ENSMUSG00000059498/ENSMUSG00000026656/ENSMUSG00000015947/ENSMUSG00000018774/ENSMUSG00000046805/ENSMUSG00000076617/ENSMUSG00000079685/ENSMUSG00000039316
GO:0002819	regulation of adaptive immune response	17/222	254/23133	0.0669291	6.9742	9.42408	4.4879e-10	1.477e-08	1.02345e-08	ENSMUSG00000112148/ENSMUSG00000058715/ENSMUSG00000026177/ENSMUSG00000031264/ENSMUSG00000023992/ENSMUSG00000022488/ENSMUSG00000112023/ENSMUSG00000059498/ENSMUSG00000026656/ENSMUSG00000015947/ENSMUSG00000002603/ENSMUSG00000031101/ENSMUSG00000020399/ENSMUSG00000031659/ENSMUSG00000004266/ENSMUSG00000079685/ENSMUSG00000028369
GO:0071677	positive regulation of mononuclear cell migration	12/222	106/23133	0.113208	11.7965	10.9668	4.51183e-10	1.477e-08	1.02345e-08	ENSMUSG00000052336/ENSMUSG00000024621/ENSMUSG00000002111/ENSMUSG00000023992/ENSMUSG00000049130/ENSMUSG00000024397/ENSMUSG00000002603/ENSMUSG00000040552/ENSMUSG00000042190/ENSMUSG00000030707/ENSMUSG00000052085/ENSMUSG00000025473
GO:0042554	superoxide anion generation	9/222	46/23133	0.195652	20.3875	12.9562	4.75157e-10	1.53858e-08	1.06611e-08	ENSMUSG00000030786/ENSMUSG00000030579/ENSMUSG00000015950/ENSMUSG00000002603/ENSMUSG00000015340/ENSMUSG00000000290/ENSMUSG00000021457/ENSMUSG00000064267/ENSMUSG00000026480
GO:0002758	innate immune response-activating signaling pathway	18/222	292/23133	0.0616438	6.42345	9.1806	5.13572e-10	1.64509e-08	1.13991e-08	ENSMUSG00000022126/ENSMUSG00000031264/ENSMUSG00000040522/ENSMUSG00000023992/ENSMUSG00000033777/ENSMUSG00000044583/ENSMUSG00000030579/ENSMUSG00000073490/ENSMUSG00000021457/ENSMUSG00000037860/ENSMUSG00000039997/ENSMUSG00000020399/ENSMUSG00000020227/ENSMUSG00000025017/ENSMUSG00000090272/ENSMUSG00000039316/ENSMUSG00000044827/ENSMUSG00000036103
GO:0050866	negative regulation of cell activation	16/222	223/23133	0.0717489	7.47643	9.56613	5.38047e-10	1.70515e-08	1.18154e-08	ENSMUSG00000029816/ENSMUSG00000112148/ENSMUSG00000038147/ENSMUSG00000031264/ENSMUSG00000023992/ENSMUSG00000030798/ENSMUSG00000030579/ENSMUSG00000112023/ENSMUSG00000026656/ENSMUSG00000002603/ENSMUSG00000026288/ENSMUSG00000040528/ENSMUSG00000020399/ENSMUSG00000004266/ENSMUSG00000090958/ENSMUSG00000034708
GO:0002279	mast cell activation involved in immune response	10/222	65/23133	0.153846	16.0312	11.9455	6.10769e-10	1.91524e-08	1.32711e-08	ENSMUSG00000112148/ENSMUSG00000058715/ENSMUSG00000038147/ENSMUSG00000031264/ENSMUSG00000021457/ENSMUSG00000033220/ENSMUSG00000040528/ENSMUSG00000053158/ENSMUSG00000040751/ENSMUSG00000004266
GO:0032653	regulation of interleukin-10 production	10/222	66/23133	0.151515	15.7883	11.8428	7.13846e-10	2.21515e-08	1.53493e-08	ENSMUSG00000112148/ENSMUSG00000058715/ENSMUSG00000038147/ENSMUSG00000031264/ENSMUSG00000023992/ENSMUSG00000030579/ENSMUSG00000112023/ENSMUSG00000026656/ENSMUSG00000031101/ENSMUSG00000021457
GO:0050921	positive regulation of chemotaxis	14/222	165/23133	0.0848485	8.84144	9.95033	7.49327e-10	2.30128e-08	1.59461e-08	ENSMUSG00000052336/ENSMUSG00000024621/ENSMUSG00000002111/ENSMUSG00000023992/ENSMUSG00000022488/ENSMUSG00000049130/ENSMUSG00000024397/ENSMUSG00000002603/ENSMUSG00000040552/ENSMUSG00000033220/ENSMUSG00000042190/ENSMUSG00000034786/ENSMUSG00000057967/ENSMUSG00000001741
GO:0002283	neutrophil activation involved in immune response	7/222	22/23133	0.318182	33.1554	14.8531	1.029e-09	3.12794e-08	2.16741e-08	ENSMUSG00000024300/ENSMUSG00000030786/ENSMUSG00000058715/ENSMUSG00000002111/ENSMUSG00000030579/ENSMUSG00000000290/ENSMUSG00000021457
GO:0150076	neuroinflammatory response	11/222	90/23133	0.122222	12.7359	10.9807	1.0622e-09	3.19625e-08	2.21475e-08	ENSMUSG00000052336/ENSMUSG00000030786/ENSMUSG00000036887/ENSMUSG00000024621/ENSMUSG00000023992/ENSMUSG00000049130/ENSMUSG00000030579/ENSMUSG00000024397/ENSMUSG00000030560/ENSMUSG00000044827/ENSMUSG00000034708
GO:0032613	interleukin-10 production	10/222	69/23133	0.144928	15.1018	11.5477	1.12201e-09	3.34248e-08	2.31607e-08	ENSMUSG00000112148/ENSMUSG00000058715/ENSMUSG00000038147/ENSMUSG00000031264/ENSMUSG00000023992/ENSMUSG00000030579/ENSMUSG00000112023/ENSMUSG00000026656/ENSMUSG00000031101/ENSMUSG00000021457
GO:0002695	negative regulation of leukocyte activation	15/222	204/23133	0.0735294	7.66196	9.40775	1.3502e-09	3.98243e-08	2.75951e-08	ENSMUSG00000029816/ENSMUSG00000112148/ENSMUSG00000038147/ENSMUSG00000031264/ENSMUSG00000030798/ENSMUSG00000030579/ENSMUSG00000112023/ENSMUSG00000026656/ENSMUSG00000002603/ENSMUSG00000026288/ENSMUSG00000040528/ENSMUSG00000020399/ENSMUSG00000004266/ENSMUSG00000090958/ENSMUSG00000034708
GO:0002822	regulation of adaptive immune response based on somatic recombination of immune receptors built from immunoglobulin superfamily domains	16/222	238/23133	0.0672269	7.00522	9.1666	1.39199e-09	4.06543e-08	2.81702e-08	ENSMUSG00000112148/ENSMUSG00000058715/ENSMUSG00000026177/ENSMUSG00000031264/ENSMUSG00000023992/ENSMUSG00000022488/ENSMUSG00000112023/ENSMUSG00000059498/ENSMUSG00000026656/ENSMUSG00000015947/ENSMUSG00000002603/ENSMUSG00000031101/ENSMUSG00000020399/ENSMUSG00000004266/ENSMUSG00000079685/ENSMUSG00000028369
GO:0032642	regulation of chemokine production	12/222	117/23133	0.102564	10.6875	10.3407	1.43241e-09	4.14287e-08	2.87068e-08	ENSMUSG00000112148/ENSMUSG00000022548/ENSMUSG00000024621/ENSMUSG00000038147/ENSMUSG00000023992/ENSMUSG00000044583/ENSMUSG00000112023/ENSMUSG00000024397/ENSMUSG00000002603/ENSMUSG00000021457/ENSMUSG00000020399/ENSMUSG00000001741
GO:0001776	leukocyte homeostasis	13/222	145/23133	0.0896552	9.34231	9.9193	1.56062e-09	4.45908e-08	3.08979e-08	ENSMUSG00000030786/ENSMUSG00000058818/ENSMUSG00000112148/ENSMUSG00000024621/ENSMUSG00000058715/ENSMUSG00000031264/ENSMUSG00000022488/ENSMUSG00000026656/ENSMUSG00000002603/ENSMUSG00000031101/ENSMUSG00000037860/ENSMUSG00000030707/ENSMUSG00000102037
GO:0002285	lymphocyte activation involved in immune response	16/222	240/23133	0.0666667	6.94685	9.11595	1.57168e-09	4.45908e-08	3.08979e-08	ENSMUSG00000004707/ENSMUSG00000112148/ENSMUSG00000058715/ENSMUSG00000002111/ENSMUSG00000026177/ENSMUSG00000023992/ENSMUSG00000022488/ENSMUSG00000030579/ENSMUSG00000002603/ENSMUSG00000030144/ENSMUSG00000021624/ENSMUSG00000021998/ENSMUSG00000020399/ENSMUSG00000041515/ENSMUSG00000030707/ENSMUSG00000030830
GO:0030593	neutrophil chemotaxis	11/222	94/23133	0.117021	12.1939	10.7047	1.70456e-09	4.79045e-08	3.3194e-08	ENSMUSG00000034116/ENSMUSG00000030786/ENSMUSG00000058715/ENSMUSG00000022488/ENSMUSG00000049130/ENSMUSG00000059498/ENSMUSG00000040552/ENSMUSG00000000290/ENSMUSG00000021457/ENSMUSG00000033220/ENSMUSG00000029304
GO:0036230	granulocyte activation	9/222	53/23133	0.169811	17.6948	11.9774	1.80331e-09	5.02061e-08	3.47889e-08	ENSMUSG00000024300/ENSMUSG00000030786/ENSMUSG00000058715/ENSMUSG00000002111/ENSMUSG00000030579/ENSMUSG00000000290/ENSMUSG00000021457/ENSMUSG00000001741/ENSMUSG00000034708
GO:0006801	superoxide metabolic process	10/222	73/23133	0.136986	14.2743	11.1816	1.98283e-09	5.46932e-08	3.7898e-08	ENSMUSG00000030786/ENSMUSG00000030579/ENSMUSG00000015950/ENSMUSG00000002603/ENSMUSG00000015340/ENSMUSG00000000290/ENSMUSG00000021457/ENSMUSG00000064267/ENSMUSG00000026480/ENSMUSG00000052384
GO:0002218	activation of innate immune response	18/222	322/23133	0.0559006	5.825	8.5825	2.43957e-09	6.63245e-08	4.59576e-08	ENSMUSG00000022126/ENSMUSG00000031264/ENSMUSG00000040522/ENSMUSG00000023992/ENSMUSG00000033777/ENSMUSG00000044583/ENSMUSG00000030579/ENSMUSG00000073490/ENSMUSG00000021457/ENSMUSG00000037860/ENSMUSG00000039997/ENSMUSG00000020399/ENSMUSG00000020227/ENSMUSG00000025017/ENSMUSG00000090272/ENSMUSG00000039316/ENSMUSG00000044827/ENSMUSG00000036103
GO:0071216	cellular response to biotic stimulus	19/222	362/23133	0.0524862	5.4692	8.43635	2.44904e-09	6.63245e-08	4.59576e-08	ENSMUSG00000030653/ENSMUSG00000026712/ENSMUSG00000052336/ENSMUSG00000022126/ENSMUSG00000112148/ENSMUSG00000110195/ENSMUSG00000038147/ENSMUSG00000002111/ENSMUSG00000031264/ENSMUSG00000023992/ENSMUSG00000021423/ENSMUSG00000026656/ENSMUSG00000018774/ENSMUSG00000021457/ENSMUSG00000021624/ENSMUSG00000020399/ENSMUSG00000020227/ENSMUSG00000041515/ENSMUSG00000044827
GO:0032715	negative regulation of interleukin-6 production	9/222	55/23133	0.163636	17.0514	11.7315	2.54473e-09	6.76852e-08	4.69004e-08	ENSMUSG00000112148/ENSMUSG00000038147/ENSMUSG00000022488/ENSMUSG00000112023/ENSMUSG00000026288/ENSMUSG00000020399/ENSMUSG00000020227/ENSMUSG00000004266/ENSMUSG00000031103
GO:0043300	regulation of leukocyte degranulation	9/222	55/23133	0.163636	17.0514	11.7315	2.54473e-09	6.76852e-08	4.69004e-08	ENSMUSG00000030786/ENSMUSG00000058715/ENSMUSG00000038147/ENSMUSG00000002111/ENSMUSG00000022488/ENSMUSG00000000290/ENSMUSG00000021457/ENSMUSG00000033220/ENSMUSG00000053158
GO:0016064	immunoglobulin mediated immune response	15/222	214/23133	0.0700935	7.30393	9.11972	2.60898e-09	6.878e-08	4.76591e-08	ENSMUSG00000036887/ENSMUSG00000058715/ENSMUSG00000031264/ENSMUSG00000023992/ENSMUSG00000071713/ENSMUSG00000059498/ENSMUSG00000026656/ENSMUSG00000015947/ENSMUSG00000002603/ENSMUSG00000026288/ENSMUSG00000071714/ENSMUSG00000076617/ENSMUSG00000030745/ENSMUSG00000004266/ENSMUSG00000028369
GO:0002761	regulation of myeloid leukocyte differentiation	13/222	153/23133	0.0849673	8.85382	9.59429	3.02124e-09	7.89497e-08	5.47059e-08	ENSMUSG00000030786/ENSMUSG00000112148/ENSMUSG00000024621/ENSMUSG00000093938/ENSMUSG00000023992/ENSMUSG00000030579/ENSMUSG00000112023/ENSMUSG00000002603/ENSMUSG00000022831/ENSMUSG00000019122/ENSMUSG00000026288/ENSMUSG00000053158/ENSMUSG00000025473
GO:0071675	regulation of mononuclear cell migration	13/222	154/23133	0.0844156	8.79633	9.55534	3.27212e-09	8.47621e-08	5.87334e-08	ENSMUSG00000052336/ENSMUSG00000022548/ENSMUSG00000024621/ENSMUSG00000002111/ENSMUSG00000023992/ENSMUSG00000049130/ENSMUSG00000024397/ENSMUSG00000002603/ENSMUSG00000040552/ENSMUSG00000042190/ENSMUSG00000030707/ENSMUSG00000052085/ENSMUSG00000025473
GO:0031348	negative regulation of defense response	17/222	291/23133	0.0584192	6.08744	8.59686	3.55896e-09	9.13979e-08	6.33315e-08	ENSMUSG00000052336/ENSMUSG00000022126/ENSMUSG00000023992/ENSMUSG00000021322/ENSMUSG00000026656/ENSMUSG00000002603/ENSMUSG00000073490/ENSMUSG00000048583/ENSMUSG00000039997/ENSMUSG00000020399/ENSMUSG00000020227/ENSMUSG00000030474/ENSMUSG00000090272/ENSMUSG00000004266/ENSMUSG00000031103/ENSMUSG00000025701/ENSMUSG00000034708
GO:0050671	positive regulation of lymphocyte proliferation	13/222	156/23133	0.0833333	8.68356	9.47849	3.8313e-09	9.75508e-08	6.7595e-08	ENSMUSG00000024621/ENSMUSG00000031264/ENSMUSG00000022488/ENSMUSG00000052142/ENSMUSG00000024397/ENSMUSG00000031101/ENSMUSG00000021457/ENSMUSG00000048583/ENSMUSG00000020399/ENSMUSG00000030707/ENSMUSG00000076617/ENSMUSG00000030830/ENSMUSG00000047810
GO:0032602	chemokine production	12/222	128/23133	0.09375	9.769	9.79276	4.0427e-09	1.02061e-07	7.07201e-08	ENSMUSG00000112148/ENSMUSG00000022548/ENSMUSG00000024621/ENSMUSG00000038147/ENSMUSG00000023992/ENSMUSG00000044583/ENSMUSG00000112023/ENSMUSG00000024397/ENSMUSG00000002603/ENSMUSG00000021457/ENSMUSG00000020399/ENSMUSG00000001741
GO:0050870	positive regulation of T cell activation	16/222	258/23133	0.0620155	6.46218	8.68474	4.45398e-09	1.11499e-07	7.72602e-08	ENSMUSG00000034116/ENSMUSG00000112148/ENSMUSG00000022488/ENSMUSG00000052142/ENSMUSG00000112023/ENSMUSG00000024397/ENSMUSG00000002603/ENSMUSG00000031101/ENSMUSG00000021457/ENSMUSG00000048583/ENSMUSG00000020399/ENSMUSG00000030707/ENSMUSG00000052085/ENSMUSG00000030830/ENSMUSG00000025473/ENSMUSG00000047810
GO:0032651	regulation of interleukin-1 beta production	11/222	103/23133	0.106796	11.1284	10.1409	4.56635e-09	1.1336e-07	7.85492e-08	ENSMUSG00000052336/ENSMUSG00000112148/ENSMUSG00000040522/ENSMUSG00000023992/ENSMUSG00000030579/ENSMUSG00000112023/ENSMUSG00000073490/ENSMUSG00000037860/ENSMUSG00000039997/ENSMUSG00000090272/ENSMUSG00000031103
GO:0032946	positive regulation of mononuclear cell proliferation	13/222	159/23133	0.081761	8.51972	9.36576	4.83331e-09	1.18995e-07	8.24544e-08	ENSMUSG00000024621/ENSMUSG00000031264/ENSMUSG00000022488/ENSMUSG00000052142/ENSMUSG00000024397/ENSMUSG00000031101/ENSMUSG00000021457/ENSMUSG00000048583/ENSMUSG00000020399/ENSMUSG00000030707/ENSMUSG00000076617/ENSMUSG00000030830/ENSMUSG00000047810
GO:0022409	positive regulation of cell-cell adhesion	18/222	339/23133	0.0530973	5.53289	8.2761	5.46977e-09	1.33561e-07	9.25472e-08	ENSMUSG00000034116/ENSMUSG00000112148/ENSMUSG00000022488/ENSMUSG00000052142/ENSMUSG00000112023/ENSMUSG00000024397/ENSMUSG00000002603/ENSMUSG00000000290/ENSMUSG00000031101/ENSMUSG00000021457/ENSMUSG00000048583/ENSMUSG00000020399/ENSMUSG00000030707/ENSMUSG00000052085/ENSMUSG00000030830/ENSMUSG00000025473/ENSMUSG00000047810/ENSMUSG00000025701
GO:0007229	integrin-mediated signaling pathway	11/222	105/23133	0.104762	10.9165	10.025	5.60919e-09	1.35852e-07	9.41345e-08	ENSMUSG00000034116/ENSMUSG00000030786/ENSMUSG00000058715/ENSMUSG00000030579/ENSMUSG00000000290/ENSMUSG00000024965/ENSMUSG00000021457/ENSMUSG00000020120/ENSMUSG00000030830/ENSMUSG00000022148/ENSMUSG00000005397
GO:0048872	homeostasis of number of cells	20/222	427/23133	0.0468384	4.88069	7.96734	6.39244e-09	1.53573e-07	1.06414e-07	ENSMUSG00000052336/ENSMUSG00000030786/ENSMUSG00000058818/ENSMUSG00000112148/ENSMUSG00000024621/ENSMUSG00000058715/ENSMUSG00000002111/ENSMUSG00000031264/ENSMUSG00000022488/ENSMUSG00000026656/ENSMUSG00000002603/ENSMUSG00000022831/ENSMUSG00000031101/ENSMUSG00000022371/ENSMUSG00000033220/ENSMUSG00000026288/ENSMUSG00000037860/ENSMUSG00000032698/ENSMUSG00000030707/ENSMUSG00000102037
GO:0045055	regulated exocytosis	16/222	265/23133	0.0603774	6.29148	8.528	6.52636e-09	1.55536e-07	1.07774e-07	ENSMUSG00000024300/ENSMUSG00000030786/ENSMUSG00000058715/ENSMUSG00000038147/ENSMUSG00000002111/ENSMUSG00000031264/ENSMUSG00000022488/ENSMUSG00000000290/ENSMUSG00000021457/ENSMUSG00000033220/ENSMUSG00000040528/ENSMUSG00000053158/ENSMUSG00000024261/ENSMUSG00000040751/ENSMUSG00000030707/ENSMUSG00000020120
GO:0032611	interleukin-1 beta production	11/222	109/23133	0.100917	10.5159	9.8024	8.35384e-09	1.97509e-07	1.36858e-07	ENSMUSG00000052336/ENSMUSG00000112148/ENSMUSG00000040522/ENSMUSG00000023992/ENSMUSG00000030579/ENSMUSG00000112023/ENSMUSG00000073490/ENSMUSG00000037860/ENSMUSG00000039997/ENSMUSG00000090272/ENSMUSG00000031103
GO:0050766	positive regulation of phagocytosis	10/222	88/23133	0.113636	11.8412	10.0298	1.27087e-08	2.98105e-07	2.06563e-07	ENSMUSG00000058715/ENSMUSG00000026177/ENSMUSG00000031264/ENSMUSG00000023992/ENSMUSG00000022488/ENSMUSG00000059498/ENSMUSG00000026656/ENSMUSG00000015947/ENSMUSG00000001128/ENSMUSG00000020143
GO:0002507	tolerance induction	7/222	31/23133	0.225806	23.5296	12.3558	1.47433e-08	3.37848e-07	2.34102e-07	ENSMUSG00000022126/ENSMUSG00000112148/ENSMUSG00000112023/ENSMUSG00000002603/ENSMUSG00000040552/ENSMUSG00000020399/ENSMUSG00000020227
GO:0002675	positive regulation of acute inflammatory response	7/222	31/23133	0.225806	23.5296	12.3558	1.47433e-08	3.37848e-07	2.34102e-07	ENSMUSG00000058715/ENSMUSG00000031264/ENSMUSG00000020573/ENSMUSG00000060063/ENSMUSG00000059498/ENSMUSG00000015947/ENSMUSG00000025473
GO:0045730	respiratory burst	7/222	31/23133	0.225806	23.5296	12.3558	1.47433e-08	3.37848e-07	2.34102e-07	ENSMUSG00000026177/ENSMUSG00000023992/ENSMUSG00000015950/ENSMUSG00000015340/ENSMUSG00000033220/ENSMUSG00000026480/ENSMUSG00000034708
GO:0002221	pattern recognition receptor signaling pathway	16/222	281/23133	0.0569395	5.93325	8.19003	1.49638e-08	3.40284e-07	2.3579e-07	ENSMUSG00000022126/ENSMUSG00000031264/ENSMUSG00000040522/ENSMUSG00000023992/ENSMUSG00000033777/ENSMUSG00000044583/ENSMUSG00000073490/ENSMUSG00000037860/ENSMUSG00000039997/ENSMUSG00000020399/ENSMUSG00000020227/ENSMUSG00000025017/ENSMUSG00000090272/ENSMUSG00000039316/ENSMUSG00000044827/ENSMUSG00000036103
GO:0042113	B cell activation	17/222	323/23133	0.0526316	5.48435	7.98913	1.67952e-08	3.79038e-07	2.62643e-07	ENSMUSG00000112148/ENSMUSG00000002111/ENSMUSG00000031264/ENSMUSG00000022488/ENSMUSG00000030579/ENSMUSG00000026656/ENSMUSG00000002603/ENSMUSG00000031101/ENSMUSG00000061132/ENSMUSG00000021457/ENSMUSG00000021624/ENSMUSG00000026288/ENSMUSG00000040751/ENSMUSG00000041515/ENSMUSG00000076617/ENSMUSG00000004266/ENSMUSG00000032436
GO:0045639	positive regulation of myeloid cell differentiation	11/222	117/23133	0.0940171	9.79684	9.39	1.76647e-08	3.95662e-07	2.74162e-07	ENSMUSG00000030786/ENSMUSG00000024621/ENSMUSG00000093938/ENSMUSG00000023992/ENSMUSG00000022488/ENSMUSG00000030579/ENSMUSG00000002603/ENSMUSG00000022831/ENSMUSG00000019122/ENSMUSG00000026288/ENSMUSG00000053158
GO:1903706	regulation of hemopoiesis	20/222	454/23133	0.0440529	4.59043	7.60542	1.78358e-08	3.96514e-07	2.74753e-07	ENSMUSG00000030786/ENSMUSG00000112148/ENSMUSG00000024621/ENSMUSG00000002111/ENSMUSG00000093938/ENSMUSG00000023992/ENSMUSG00000022488/ENSMUSG00000030579/ENSMUSG00000112023/ENSMUSG00000002603/ENSMUSG00000022831/ENSMUSG00000031101/ENSMUSG00000021457/ENSMUSG00000019122/ENSMUSG00000026288/ENSMUSG00000053158/ENSMUSG00000032698/ENSMUSG00000004266/ENSMUSG00000025473/ENSMUSG00000024529
GO:0002707	negative regulation of lymphocyte mediated immunity	9/222	69/23133	0.130435	13.5917	10.311	2.01919e-08	4.44595e-07	3.08069e-07	ENSMUSG00000112148/ENSMUSG00000022488/ENSMUSG00000112023/ENSMUSG00000026656/ENSMUSG00000002603/ENSMUSG00000048583/ENSMUSG00000020399/ENSMUSG00000004266/ENSMUSG00000028369
GO:1902105	regulation of leukocyte differentiation	18/222	369/23133	0.0487805	5.08306	7.78279	2.0297e-08	4.44595e-07	3.08069e-07	ENSMUSG00000030786/ENSMUSG00000112148/ENSMUSG00000024621/ENSMUSG00000002111/ENSMUSG00000093938/ENSMUSG00000023992/ENSMUSG00000022488/ENSMUSG00000030579/ENSMUSG00000112023/ENSMUSG00000002603/ENSMUSG00000022831/ENSMUSG00000031101/ENSMUSG00000021457/ENSMUSG00000019122/ENSMUSG00000026288/ENSMUSG00000053158/ENSMUSG00000004266/ENSMUSG00000025473
GO:0050864	regulation of B cell activation	12/222	149/23133	0.0805369	8.39216	8.91072	2.26556e-08	4.92635e-07	3.41357e-07	ENSMUSG00000112148/ENSMUSG00000002111/ENSMUSG00000031264/ENSMUSG00000022488/ENSMUSG00000030579/ENSMUSG00000026656/ENSMUSG00000002603/ENSMUSG00000031101/ENSMUSG00000021457/ENSMUSG00000026288/ENSMUSG00000076617/ENSMUSG00000004266
GO:0071219	cellular response to molecule of bacterial origin	17/222	333/23133	0.0510511	5.31966	7.81565	2.62621e-08	5.66919e-07	3.9283e-07	ENSMUSG00000030653/ENSMUSG00000026712/ENSMUSG00000052336/ENSMUSG00000022126/ENSMUSG00000112148/ENSMUSG00000110195/ENSMUSG00000038147/ENSMUSG00000002111/ENSMUSG00000023992/ENSMUSG00000021423/ENSMUSG00000026656/ENSMUSG00000018774/ENSMUSG00000021624/ENSMUSG00000020399/ENSMUSG00000020227/ENSMUSG00000041515/ENSMUSG00000044827
GO:0030098	lymphocyte differentiation	20/222	467/23133	0.0428266	4.46264	7.44114	2.84544e-08	6.09824e-07	4.2256e-07	ENSMUSG00000004707/ENSMUSG00000034116/ENSMUSG00000112148/ENSMUSG00000058715/ENSMUSG00000002111/ENSMUSG00000031264/ENSMUSG00000022488/ENSMUSG00000112023/ENSMUSG00000002603/ENSMUSG00000030144/ENSMUSG00000031101/ENSMUSG00000021457/ENSMUSG00000026288/ENSMUSG00000041515/ENSMUSG00000076617/ENSMUSG00000004266/ENSMUSG00000025473/ENSMUSG00000020143/ENSMUSG00000032092/ENSMUSG00000032436
GO:0032102	negative regulation of response to external stimulus	19/222	424/23133	0.0448113	4.66946	7.50667	3.144e-08	6.68998e-07	4.63562e-07	ENSMUSG00000052336/ENSMUSG00000022126/ENSMUSG00000023992/ENSMUSG00000021322/ENSMUSG00000024397/ENSMUSG00000026656/ENSMUSG00000002603/ENSMUSG00000073490/ENSMUSG00000048583/ENSMUSG00000039997/ENSMUSG00000020399/ENSMUSG00000020227/ENSMUSG00000030474/ENSMUSG00000090272/ENSMUSG00000021822/ENSMUSG00000004266/ENSMUSG00000031103/ENSMUSG00000025701/ENSMUSG00000034708
GO:0002712	regulation of B cell mediated immunity	9/222	73/23133	0.123288	12.8469	9.97925	3.34602e-08	7.01957e-07	4.864e-07	ENSMUSG00000058715/ENSMUSG00000031264/ENSMUSG00000023992/ENSMUSG00000059498/ENSMUSG00000026656/ENSMUSG00000015947/ENSMUSG00000002603/ENSMUSG00000004266/ENSMUSG00000028369
GO:0002889	regulation of immunoglobulin mediated immune response	9/222	73/23133	0.123288	12.8469	9.97925	3.34602e-08	7.01957e-07	4.864e-07	ENSMUSG00000058715/ENSMUSG00000031264/ENSMUSG00000023992/ENSMUSG00000059498/ENSMUSG00000026656/ENSMUSG00000015947/ENSMUSG00000002603/ENSMUSG00000004266/ENSMUSG00000028369
GO:0002281	macrophage activation involved in immune response	6/222	21/23133	0.285714	29.7722	12.9845	3.51251e-08	7.31732e-07	5.07032e-07	ENSMUSG00000052336/ENSMUSG00000023992/ENSMUSG00000030579/ENSMUSG00000021457/ENSMUSG00000020399/ENSMUSG00000034708
GO:0072593	reactive oxygen species metabolic process	15/222	261/23133	0.0574713	5.98866	7.97835	3.78181e-08	7.82362e-07	5.42115e-07	ENSMUSG00000022126/ENSMUSG00000034116/ENSMUSG00000030786/ENSMUSG00000030579/ENSMUSG00000015950/ENSMUSG00000002603/ENSMUSG00000015340/ENSMUSG00000000290/ENSMUSG00000021457/ENSMUSG00000024066/ENSMUSG00000064267/ENSMUSG00000026480/ENSMUSG00000052384/ENSMUSG00000021822/ENSMUSG00000025701
GO:0002673	regulation of acute inflammatory response	8/222	53/23133	0.150943	15.7287	10.5669	3.87701e-08	7.96526e-07	5.51929e-07	ENSMUSG00000058715/ENSMUSG00000031264/ENSMUSG00000020573/ENSMUSG00000060063/ENSMUSG00000059498/ENSMUSG00000026656/ENSMUSG00000015947/ENSMUSG00000025473
GO:0002705	positive regulation of leukocyte mediated immunity	13/222	190/23133	0.0684211	7.12966	8.3512	4.10257e-08	8.37094e-07	5.80039e-07	ENSMUSG00000034116/ENSMUSG00000030786/ENSMUSG00000058715/ENSMUSG00000002111/ENSMUSG00000031264/ENSMUSG00000023992/ENSMUSG00000030579/ENSMUSG00000059498/ENSMUSG00000015947/ENSMUSG00000002603/ENSMUSG00000000290/ENSMUSG00000031101/ENSMUSG00000079685
GO:0002763	positive regulation of myeloid leukocyte differentiation	9/222	77/23133	0.116883	12.1795	9.67249	5.37861e-08	1.08999e-06	7.55278e-07	ENSMUSG00000030786/ENSMUSG00000024621/ENSMUSG00000093938/ENSMUSG00000023992/ENSMUSG00000030579/ENSMUSG00000002603/ENSMUSG00000022831/ENSMUSG00000019122/ENSMUSG00000053158
GO:0050920	regulation of chemotaxis	14/222	231/23133	0.0606061	6.31532	7.99207	5.63159e-08	1.13355e-06	7.85459e-07	ENSMUSG00000052336/ENSMUSG00000024621/ENSMUSG00000002111/ENSMUSG00000023992/ENSMUSG00000022488/ENSMUSG00000049130/ENSMUSG00000024397/ENSMUSG00000002603/ENSMUSG00000040552/ENSMUSG00000033220/ENSMUSG00000042190/ENSMUSG00000034786/ENSMUSG00000057967/ENSMUSG00000001741
GO:0038094	Fc-gamma receptor signaling pathway	5/222	12/23133	0.416667	43.4178	14.4676	5.83408e-08	1.16642e-06	8.08239e-07	ENSMUSG00000058715/ENSMUSG00000059498/ENSMUSG00000015947/ENSMUSG00000030144/ENSMUSG00000020437
GO:0050853	B cell receptor signaling pathway	8/222	56/23133	0.142857	14.8861	10.2411	6.06202e-08	1.20392e-06	8.34219e-07	ENSMUSG00000031264/ENSMUSG00000022488/ENSMUSG00000061132/ENSMUSG00000021457/ENSMUSG00000040751/ENSMUSG00000076617/ENSMUSG00000004266/ENSMUSG00000039316
GO:0006887	exocytosis	18/222	398/23133	0.0452261	4.71269	7.35433	6.3992e-08	1.26026e-06	8.73258e-07	ENSMUSG00000024300/ENSMUSG00000030786/ENSMUSG00000058715/ENSMUSG00000038147/ENSMUSG00000002111/ENSMUSG00000031264/ENSMUSG00000022488/ENSMUSG00000000290/ENSMUSG00000021457/ENSMUSG00000033220/ENSMUSG00000040528/ENSMUSG00000053158/ENSMUSG00000024261/ENSMUSG00000020437/ENSMUSG00000040751/ENSMUSG00000030707/ENSMUSG00000020120/ENSMUSG00000003283
GO:0032693	negative regulation of interleukin-10 production	6/222	23/23133	0.26087	27.1833	12.3666	6.43031e-08	1.26026e-06	8.73258e-07	ENSMUSG00000112148/ENSMUSG00000038147/ENSMUSG00000031264/ENSMUSG00000030579/ENSMUSG00000112023/ENSMUSG00000026656
GO:0001773	myeloid dendritic cell activation	7/222	38/23133	0.184211	19.1952	11.0497	6.68357e-08	1.29288e-06	8.95864e-07	ENSMUSG00000058818/ENSMUSG00000002111/ENSMUSG00000030798/ENSMUSG00000002603/ENSMUSG00000030144/ENSMUSG00000020399/ENSMUSG00000020143
GO:0097242	amyloid-beta clearance	7/222	38/23133	0.184211	19.1952	11.0497	6.68357e-08	1.29288e-06	8.95864e-07	ENSMUSG00000026390/ENSMUSG00000030786/ENSMUSG00000023992/ENSMUSG00000025044/ENSMUSG00000049130/ENSMUSG00000000290/ENSMUSG00000021457
GO:0048002	antigen processing and presentation of peptide antigen	9/222	81/23133	0.111111	11.5781	9.38763	8.41428e-08	1.61717e-06	1.12057e-06	ENSMUSG00000058715/ENSMUSG00000026177/ENSMUSG00000023992/ENSMUSG00000038642/ENSMUSG00000059498/ENSMUSG00000026656/ENSMUSG00000015947/ENSMUSG00000046805/ENSMUSG00000079685
GO:0002437	inflammatory response to antigenic stimulus	9/222	82/23133	0.109756	11.4369	9.31953	9.37359e-08	1.78999e-06	1.24032e-06	ENSMUSG00000112148/ENSMUSG00000058715/ENSMUSG00000031264/ENSMUSG00000023992/ENSMUSG00000059498/ENSMUSG00000026656/ENSMUSG00000015947/ENSMUSG00000018774/ENSMUSG00000052821
GO:0032496	response to lipopolysaccharide	19/222	458/23133	0.0414847	4.32282	7.07012	1.05393e-07	1.99204e-06	1.38032e-06	ENSMUSG00000030653/ENSMUSG00000026712/ENSMUSG00000052336/ENSMUSG00000022126/ENSMUSG00000112148/ENSMUSG00000110195/ENSMUSG00000038147/ENSMUSG00000002111/ENSMUSG00000026177/ENSMUSG00000031264/ENSMUSG00000023992/ENSMUSG00000021423/ENSMUSG00000018774/ENSMUSG00000021624/ENSMUSG00000020399/ENSMUSG00000020227/ENSMUSG00000041515/ENSMUSG00000026480/ENSMUSG00000020681
GO:0043303	mast cell degranulation	8/222	60/23133	0.133333	13.8937	9.84378	1.05654e-07	1.99204e-06	1.38032e-06	ENSMUSG00000058715/ENSMUSG00000038147/ENSMUSG00000031264/ENSMUSG00000021457/ENSMUSG00000033220/ENSMUSG00000040528/ENSMUSG00000053158/ENSMUSG00000040751
GO:2000379	positive regulation of reactive oxygen species metabolic process	9/222	84/23133	0.107143	11.1646	9.18679	1.15815e-07	2.1699e-06	1.50357e-06	ENSMUSG00000022126/ENSMUSG00000030786/ENSMUSG00000030579/ENSMUSG00000002603/ENSMUSG00000000290/ENSMUSG00000021457/ENSMUSG00000024066/ENSMUSG00000064267/ENSMUSG00000021822
GO:1901342	regulation of vasculature development	16/222	326/23133	0.0490798	5.11424	7.3642	1.17168e-07	2.18153e-06	1.51162e-06	ENSMUSG00000042286/ENSMUSG00000052336/ENSMUSG00000049130/ENSMUSG00000020573/ENSMUSG00000002603/ENSMUSG00000015340/ENSMUSG00000040552/ENSMUSG00000000290/ENSMUSG00000048583/ENSMUSG00000017737/ENSMUSG00000052821/ENSMUSG00000000530/ENSMUSG00000057967/ENSMUSG00000004266/ENSMUSG00000025701/ENSMUSG00000034708
GO:0002690	positive regulation of leukocyte chemotaxis	10/222	111/23133	0.0900901	9.38763	8.71947	1.19779e-07	2.21629e-06	1.53571e-06	ENSMUSG00000052336/ENSMUSG00000024621/ENSMUSG00000002111/ENSMUSG00000022488/ENSMUSG00000049130/ENSMUSG00000024397/ENSMUSG00000040552/ENSMUSG00000033220/ENSMUSG00000042190/ENSMUSG00000034786
GO:0032755	positive regulation of interleukin-6 production	10/222	112/23133	0.0892857	9.30381	8.67133	1.3043e-07	2.39846e-06	1.66194e-06	ENSMUSG00000058715/ENSMUSG00000031264/ENSMUSG00000040522/ENSMUSG00000044583/ENSMUSG00000030579/ENSMUSG00000024397/ENSMUSG00000002603/ENSMUSG00000021457/ENSMUSG00000044827/ENSMUSG00000001741
GO:0002286	T cell activation involved in immune response	11/222	142/23133	0.0774648	8.07204	8.32091	1.31619e-07	2.40548e-06	1.6668e-06	ENSMUSG00000004707/ENSMUSG00000058715/ENSMUSG00000026177/ENSMUSG00000023992/ENSMUSG00000022488/ENSMUSG00000030579/ENSMUSG00000002603/ENSMUSG00000030144/ENSMUSG00000021998/ENSMUSG00000020399/ENSMUSG00000030830
GO:0002448	mast cell mediated immunity	8/222	62/23133	0.129032	13.4455	9.65909	1.37337e-07	2.49468e-06	1.72861e-06	ENSMUSG00000058715/ENSMUSG00000038147/ENSMUSG00000031264/ENSMUSG00000021457/ENSMUSG00000033220/ENSMUSG00000040528/ENSMUSG00000053158/ENSMUSG00000040751
GO:0002446	neutrophil mediated immunity	7/222	42/23133	0.166667	17.3671	10.4505	1.38296e-07	2.49687e-06	1.73014e-06	ENSMUSG00000024300/ENSMUSG00000030786/ENSMUSG00000002111/ENSMUSG00000015950/ENSMUSG00000000290/ENSMUSG00000021457/ENSMUSG00000020681
GO:0042102	positive regulation of T cell proliferation	10/222	113/23133	0.0884956	9.22148	8.62378	1.41905e-07	2.54659e-06	1.76458e-06	ENSMUSG00000022488/ENSMUSG00000052142/ENSMUSG00000024397/ENSMUSG00000031101/ENSMUSG00000021457/ENSMUSG00000048583/ENSMUSG00000020399/ENSMUSG00000030707/ENSMUSG00000030830/ENSMUSG00000047810
GO:0002883	regulation of hypersensitivity	5/222	14/23133	0.357143	37.2153	13.3423	1.45179e-07	2.58974e-06	1.79449e-06	ENSMUSG00000058715/ENSMUSG00000031264/ENSMUSG00000059498/ENSMUSG00000026656/ENSMUSG00000015947
GO:1900015	regulation of cytokine production involved in inflammatory response	8/222	63/23133	0.126984	13.2321	9.56992	1.56024e-07	2.76664e-06	1.91706e-06	ENSMUSG00000112148/ENSMUSG00000022548/ENSMUSG00000023992/ENSMUSG00000112023/ENSMUSG00000052160/ENSMUSG00000031659/ENSMUSG00000034786/ENSMUSG00000025701
GO:0051250	negative regulation of lymphocyte activation	12/222	179/23133	0.0670391	6.98566	7.91353	1.72021e-07	3.03225e-06	2.10111e-06	ENSMUSG00000029816/ENSMUSG00000112148/ENSMUSG00000031264/ENSMUSG00000030798/ENSMUSG00000030579/ENSMUSG00000112023/ENSMUSG00000026656/ENSMUSG00000002603/ENSMUSG00000026288/ENSMUSG00000020399/ENSMUSG00000004266/ENSMUSG00000090958
GO:0002700	regulation of production of molecular mediator of immune response	13/222	215/23133	0.0604651	6.30063	7.68633	1.74264e-07	3.05372e-06	2.11599e-06	ENSMUSG00000112148/ENSMUSG00000058715/ENSMUSG00000031264/ENSMUSG00000030798/ENSMUSG00000044583/ENSMUSG00000112023/ENSMUSG00000026656/ENSMUSG00000002603/ENSMUSG00000031101/ENSMUSG00000021457/ENSMUSG00000020227/ENSMUSG00000076617/ENSMUSG00000029771
GO:0045824	negative regulation of innate immune response	10/222	116/23133	0.0862069	8.98299	8.4846	1.81829e-07	3.1627e-06	2.1915e-06	ENSMUSG00000022126/ENSMUSG00000002603/ENSMUSG00000073490/ENSMUSG00000048583/ENSMUSG00000039997/ENSMUSG00000020399/ENSMUSG00000020227/ENSMUSG00000090272/ENSMUSG00000004266/ENSMUSG00000034708
GO:0032930	positive regulation of superoxide anion generation	6/222	27/23133	0.222222	23.1562	11.339	1.82607e-07	3.1627e-06	2.1915e-06	ENSMUSG00000030786/ENSMUSG00000030579/ENSMUSG00000002603/ENSMUSG00000000290/ENSMUSG00000021457/ENSMUSG00000064267
GO:0031341	regulation of cell killing	11/222	149/23133	0.0738255	7.69282	8.06771	2.14806e-07	3.69889e-06	2.56304e-06	ENSMUSG00000052336/ENSMUSG00000034116/ENSMUSG00000030786/ENSMUSG00000002111/ENSMUSG00000022488/ENSMUSG00000030579/ENSMUSG00000002603/ENSMUSG00000021457/ENSMUSG00000048583/ENSMUSG00000020399/ENSMUSG00000079685
GO:1904018	positive regulation of vasculature development	12/222	187/23133	0.0641711	6.6868	7.68593	2.76327e-07	4.7309e-06	3.27814e-06	ENSMUSG00000052336/ENSMUSG00000049130/ENSMUSG00000002603/ENSMUSG00000015340/ENSMUSG00000040552/ENSMUSG00000000290/ENSMUSG00000048583/ENSMUSG00000017737/ENSMUSG00000052821/ENSMUSG00000000530/ENSMUSG00000057967/ENSMUSG00000034708
GO:0050851	antigen receptor-mediated signaling pathway	12/222	188/23133	0.0638298	6.65124	7.65842	2.92699e-07	4.98258e-06	3.45253e-06	ENSMUSG00000112148/ENSMUSG00000031264/ENSMUSG00000022488/ENSMUSG00000112023/ENSMUSG00000002699/ENSMUSG00000061132/ENSMUSG00000021457/ENSMUSG00000040751/ENSMUSG00000076617/ENSMUSG00000004266/ENSMUSG00000022148/ENSMUSG00000039316
GO:0043312	neutrophil degranulation	5/222	16/23133	0.3125	32.5633	12.4319	3.11828e-07	5.27805e-06	3.65727e-06	ENSMUSG00000024300/ENSMUSG00000030786/ENSMUSG00000002111/ENSMUSG00000000290/ENSMUSG00000021457
GO:0002534	cytokine production involved in inflammatory response	8/222	69/23133	0.115942	12.0815	9.07436	3.20627e-07	5.39632e-06	3.73922e-06	ENSMUSG00000112148/ENSMUSG00000022548/ENSMUSG00000023992/ENSMUSG00000112023/ENSMUSG00000052160/ENSMUSG00000031659/ENSMUSG00000034786/ENSMUSG00000025701
GO:0030100	regulation of endocytosis	16/222	352/23133	0.0454545	4.73649	6.9536	3.30292e-07	5.52776e-06	3.8303e-06	ENSMUSG00000058715/ENSMUSG00000026177/ENSMUSG00000031264/ENSMUSG00000023992/ENSMUSG00000022488/ENSMUSG00000059498/ENSMUSG00000026656/ENSMUSG00000015947/ENSMUSG00000002603/ENSMUSG00000021457/ENSMUSG00000024261/ENSMUSG00000076617/ENSMUSG00000030474/ENSMUSG00000001128/ENSMUSG00000020143/ENSMUSG00000003283
GO:0002753	cytoplasmic pattern recognition receptor signaling pathway	12/222	191/23133	0.0628272	6.54677	7.57708	3.47125e-07	5.77701e-06	4.00301e-06	ENSMUSG00000031264/ENSMUSG00000040522/ENSMUSG00000023992/ENSMUSG00000033777/ENSMUSG00000044583/ENSMUSG00000073490/ENSMUSG00000039997/ENSMUSG00000020399/ENSMUSG00000025017/ENSMUSG00000090272/ENSMUSG00000039316/ENSMUSG00000036103
GO:0032928	regulation of superoxide anion generation	6/222	30/23133	0.2	20.8405	10.7039	3.57594e-07	5.91819e-06	4.10083e-06	ENSMUSG00000030786/ENSMUSG00000030579/ENSMUSG00000002603/ENSMUSG00000000290/ENSMUSG00000021457/ENSMUSG00000064267
GO:0032720	negative regulation of tumor necrosis factor production	8/222	71/23133	0.112676	11.7411	8.92262	4.01311e-07	6.60501e-06	4.57674e-06	ENSMUSG00000029816/ENSMUSG00000112148/ENSMUSG00000023992/ENSMUSG00000112023/ENSMUSG00000020399/ENSMUSG00000020227/ENSMUSG00000004266/ENSMUSG00000031103
GO:1905523	positive regulation of macrophage migration	6/222	31/23133	0.193548	20.1683	10.5124	4.39879e-07	7.19999e-06	4.98902e-06	ENSMUSG00000052336/ENSMUSG00000024621/ENSMUSG00000023992/ENSMUSG00000049130/ENSMUSG00000040552/ENSMUSG00000042190
GO:1903556	negative regulation of tumor necrosis factor superfamily cytokine production	8/222	73/23133	0.109589	11.4195	8.77685	4.98771e-07	8.11933e-06	5.62605e-06	ENSMUSG00000029816/ENSMUSG00000112148/ENSMUSG00000023992/ENSMUSG00000112023/ENSMUSG00000020399/ENSMUSG00000020227/ENSMUSG00000004266/ENSMUSG00000031103
GO:0045765	regulation of angiogenesis	15/222	319/23133	0.0470219	4.89981	6.90398	5.07411e-07	8.21509e-06	5.69241e-06	ENSMUSG00000042286/ENSMUSG00000052336/ENSMUSG00000049130/ENSMUSG00000020573/ENSMUSG00000015340/ENSMUSG00000040552/ENSMUSG00000000290/ENSMUSG00000048583/ENSMUSG00000017737/ENSMUSG00000052821/ENSMUSG00000000530/ENSMUSG00000057967/ENSMUSG00000004266/ENSMUSG00000025701/ENSMUSG00000034708
GO:0001910	regulation of leukocyte mediated cytotoxicity	10/222	130/23133	0.0769231	8.01559	7.89596	5.28414e-07	8.50889e-06	5.89599e-06	ENSMUSG00000052336/ENSMUSG00000034116/ENSMUSG00000030786/ENSMUSG00000002111/ENSMUSG00000022488/ENSMUSG00000030579/ENSMUSG00000002603/ENSMUSG00000048583/ENSMUSG00000020399/ENSMUSG00000079685
GO:0009620	response to fungus	8/222	74/23133	0.108108	11.2652	8.70607	5.54648e-07	8.88332e-06	6.15544e-06	ENSMUSG00000052336/ENSMUSG00000002111/ENSMUSG00000031264/ENSMUSG00000015950/ENSMUSG00000002603/ENSMUSG00000030144/ENSMUSG00000021457/ENSMUSG00000049037
GO:2000377	regulation of reactive oxygen species metabolic process	11/222	164/23133	0.0670732	6.98921	7.57672	5.63782e-07	8.98131e-06	6.22334e-06	ENSMUSG00000022126/ENSMUSG00000030786/ENSMUSG00000030579/ENSMUSG00000002603/ENSMUSG00000000290/ENSMUSG00000021457/ENSMUSG00000024066/ENSMUSG00000064267/ENSMUSG00000026480/ENSMUSG00000021822/ENSMUSG00000025701
GO:0045807	positive regulation of endocytosis	12/222	200/23133	0.06	6.25216	7.34317	5.68415e-07	9.00696e-06	6.24111e-06	ENSMUSG00000058715/ENSMUSG00000026177/ENSMUSG00000031264/ENSMUSG00000023992/ENSMUSG00000022488/ENSMUSG00000059498/ENSMUSG00000026656/ENSMUSG00000015947/ENSMUSG00000021457/ENSMUSG00000076617/ENSMUSG00000001128/ENSMUSG00000020143
GO:0002524	hypersensitivity	5/222	18/23133	0.277778	28.9452	11.675	6.02157e-07	9.49114e-06	6.5766e-06	ENSMUSG00000058715/ENSMUSG00000031264/ENSMUSG00000059498/ENSMUSG00000026656/ENSMUSG00000015947
GO:0071222	cellular response to lipopolysaccharide	15/222	324/23133	0.0462963	4.8242	6.82372	6.17498e-07	9.68172e-06	6.70866e-06	ENSMUSG00000030653/ENSMUSG00000026712/ENSMUSG00000052336/ENSMUSG00000022126/ENSMUSG00000112148/ENSMUSG00000110195/ENSMUSG00000038147/ENSMUSG00000002111/ENSMUSG00000023992/ENSMUSG00000021423/ENSMUSG00000018774/ENSMUSG00000021624/ENSMUSG00000020399/ENSMUSG00000020227/ENSMUSG00000041515
GO:0050798	activated T cell proliferation	7/222	52/23133	0.134615	14.0273	9.25741	6.32212e-07	9.86052e-06	6.83256e-06	ENSMUSG00000030786/ENSMUSG00000112148/ENSMUSG00000112023/ENSMUSG00000000290/ENSMUSG00000048583/ENSMUSG00000030830/ENSMUSG00000090958
GO:0032732	positive regulation of interleukin-1 production	8/222	77/23133	0.103896	10.8263	8.50164	7.55509e-07	1.17222e-05	8.12255e-06	ENSMUSG00000040522/ENSMUSG00000030579/ENSMUSG00000073490/ENSMUSG00000037860/ENSMUSG00000039997/ENSMUSG00000020399/ENSMUSG00000090272/ENSMUSG00000001741
GO:0002478	antigen processing and presentation of exogenous peptide antigen	6/222	34/23133	0.176471	18.3887	9.98783	7.84413e-07	1.21076e-05	8.38961e-06	ENSMUSG00000058715/ENSMUSG00000038642/ENSMUSG00000059498/ENSMUSG00000026656/ENSMUSG00000015947/ENSMUSG00000046805
GO:0061515	myeloid cell development	9/222	105/23133	0.0857143	8.93166	8.01847	7.94352e-07	1.21978e-05	8.45211e-06	ENSMUSG00000030786/ENSMUSG00000024621/ENSMUSG00000093938/ENSMUSG00000022488/ENSMUSG00000030579/ENSMUSG00000033220/ENSMUSG00000052384/ENSMUSG00000004266/ENSMUSG00000016087
GO:0038093	Fc receptor signaling pathway	5/222	19/23133	0.263158	27.4218	11.3413	8.10839e-07	1.23871e-05	8.58329e-06	ENSMUSG00000058715/ENSMUSG00000059498/ENSMUSG00000015947/ENSMUSG00000030144/ENSMUSG00000020437
GO:0030316	osteoclast differentiation	10/222	137/23133	0.0729927	7.60604	7.63372	8.57991e-07	1.30406e-05	9.0361e-06	ENSMUSG00000112148/ENSMUSG00000024621/ENSMUSG00000058715/ENSMUSG00000023992/ENSMUSG00000030579/ENSMUSG00000112023/ENSMUSG00000002603/ENSMUSG00000019122/ENSMUSG00000026288/ENSMUSG00000025473
GO:0002688	regulation of leukocyte chemotaxis	10/222	139/23133	0.0719424	7.4966	7.56218	9.8026e-07	1.48233e-05	1.02714e-05	ENSMUSG00000052336/ENSMUSG00000024621/ENSMUSG00000002111/ENSMUSG00000022488/ENSMUSG00000049130/ENSMUSG00000024397/ENSMUSG00000040552/ENSMUSG00000033220/ENSMUSG00000042190/ENSMUSG00000034786
GO:0002440	production of molecular mediator of immune response	14/222	294/23133	0.047619	4.96203	6.72999	1.0577e-06	1.58812e-05	1.10044e-05	ENSMUSG00000112148/ENSMUSG00000058715/ENSMUSG00000026177/ENSMUSG00000031264/ENSMUSG00000030798/ENSMUSG00000044583/ENSMUSG00000112023/ENSMUSG00000026656/ENSMUSG00000002603/ENSMUSG00000031101/ENSMUSG00000021457/ENSMUSG00000020227/ENSMUSG00000076617/ENSMUSG00000029771
GO:0140894	endolysosomal toll-like receptor signaling pathway	7/222	56/23133	0.125	13.0253	8.86876	1.06088e-06	1.58812e-05	1.10044e-05	ENSMUSG00000040522/ENSMUSG00000033777/ENSMUSG00000044583/ENSMUSG00000020399/ENSMUSG00000025017/ENSMUSG00000039316/ENSMUSG00000036103
GO:0051896	regulation of phosphatidylinositol 3-kinase/protein kinase B signal transduction	14/222	295/23133	0.0474576	4.94521	6.71295	1.10109e-06	1.64007e-05	1.13644e-05	ENSMUSG00000052336/ENSMUSG00000034116/ENSMUSG00000024621/ENSMUSG00000023992/ENSMUSG00000020573/ENSMUSG00000002603/ENSMUSG00000022831/ENSMUSG00000048583/ENSMUSG00000024066/ENSMUSG00000037860/ENSMUSG00000025017/ENSMUSG00000004266/ENSMUSG00000025473/ENSMUSG00000024529
GO:0045453	bone resorption	8/222	81/23133	0.0987654	10.2916	8.24595	1.1175e-06	1.64877e-05	1.14247e-05	ENSMUSG00000024621/ENSMUSG00000038642/ENSMUSG00000054675/ENSMUSG00000021457/ENSMUSG00000033220/ENSMUSG00000026288/ENSMUSG00000029304/ENSMUSG00000025473
GO:0090322	regulation of superoxide metabolic process	6/222	36/23133	0.166667	17.3671	9.67401	1.118e-06	1.64877e-05	1.14247e-05	ENSMUSG00000030786/ENSMUSG00000030579/ENSMUSG00000002603/ENSMUSG00000000290/ENSMUSG00000021457/ENSMUSG00000064267
GO:0042130	negative regulation of T cell proliferation	8/222	82/23133	0.097561	10.1661	8.18481	1.22818e-06	1.80233e-05	1.24887e-05	ENSMUSG00000029816/ENSMUSG00000112148/ENSMUSG00000030798/ENSMUSG00000112023/ENSMUSG00000002603/ENSMUSG00000020399/ENSMUSG00000004266/ENSMUSG00000090958
GO:0002864	regulation of acute inflammatory response to antigenic stimulus	5/222	21/23133	0.238095	24.8102	10.7452	1.39693e-06	2.02997e-05	1.40661e-05	ENSMUSG00000058715/ENSMUSG00000031264/ENSMUSG00000059498/ENSMUSG00000026656/ENSMUSG00000015947
GO:0048143	astrocyte activation	5/222	21/23133	0.238095	24.8102	10.7452	1.39693e-06	2.02997e-05	1.40661e-05	ENSMUSG00000036887/ENSMUSG00000024621/ENSMUSG00000023992/ENSMUSG00000049130/ENSMUSG00000034708
GO:0021782	glial cell development	10/222	146/23133	0.0684932	7.13717	7.32259	1.53624e-06	2.22158e-05	1.53938e-05	ENSMUSG00000030786/ENSMUSG00000036887/ENSMUSG00000024621/ENSMUSG00000023992/ENSMUSG00000049130/ENSMUSG00000002603/ENSMUSG00000052384/ENSMUSG00000023000/ENSMUSG00000034708/ENSMUSG00000031425
GO:0002861	regulation of inflammatory response to antigenic stimulus	6/222	38/23133	0.157895	16.4531	9.38444	1.55942e-06	2.22273e-05	1.54018e-05	ENSMUSG00000058715/ENSMUSG00000031264/ENSMUSG00000023992/ENSMUSG00000059498/ENSMUSG00000026656/ENSMUSG00000015947
GO:0014002	astrocyte development	6/222	38/23133	0.157895	16.4531	9.38444	1.55942e-06	2.22273e-05	1.54018e-05	ENSMUSG00000036887/ENSMUSG00000024621/ENSMUSG00000023992/ENSMUSG00000049130/ENSMUSG00000034708/ENSMUSG00000031425
GO:0071404	cellular response to low-density lipoprotein particle stimulus	6/222	38/23133	0.157895	16.4531	9.38444	1.55942e-06	2.22273e-05	1.54018e-05	ENSMUSG00000058715/ENSMUSG00000023992/ENSMUSG00000002603/ENSMUSG00000000290/ENSMUSG00000018774/ENSMUSG00000021457
GO:0002832	negative regulation of response to biotic stimulus	10/222	147/23133	0.0680272	7.08862	7.28965	1.6347e-06	2.31894e-05	1.60684e-05	ENSMUSG00000022126/ENSMUSG00000002603/ENSMUSG00000073490/ENSMUSG00000048583/ENSMUSG00000039997/ENSMUSG00000020399/ENSMUSG00000020227/ENSMUSG00000090272/ENSMUSG00000004266/ENSMUSG00000034708
GO:0002885	positive regulation of hypersensitivity	4/222	10/23133	0.4	41.6811	12.6658	1.65694e-06	2.33935e-05	1.62098e-05	ENSMUSG00000058715/ENSMUSG00000031264/ENSMUSG00000059498/ENSMUSG00000015947
GO:0045766	positive regulation of angiogenesis	11/222	184/23133	0.0597826	6.22951	7.0105	1.75658e-06	2.46832e-05	1.71035e-05	ENSMUSG00000052336/ENSMUSG00000049130/ENSMUSG00000015340/ENSMUSG00000040552/ENSMUSG00000000290/ENSMUSG00000048583/ENSMUSG00000017737/ENSMUSG00000052821/ENSMUSG00000000530/ENSMUSG00000057967/ENSMUSG00000034708
GO:0032722	positive regulation of chemokine production	8/222	86/23133	0.0930233	9.69327	7.95035	1.76931e-06	2.47454e-05	1.71466e-05	ENSMUSG00000024621/ENSMUSG00000038147/ENSMUSG00000044583/ENSMUSG00000024397/ENSMUSG00000002603/ENSMUSG00000021457/ENSMUSG00000020399/ENSMUSG00000001741
GO:0055094	response to lipoprotein particle	6/222	39/23133	0.153846	16.0312	9.24777	1.82826e-06	2.54504e-05	1.76351e-05	ENSMUSG00000058715/ENSMUSG00000023992/ENSMUSG00000002603/ENSMUSG00000000290/ENSMUSG00000018774/ENSMUSG00000021457
GO:0002526	acute inflammatory response	9/222	118/23133	0.0762712	7.94766	7.44793	2.12221e-06	2.92788e-05	2.02879e-05	ENSMUSG00000058715/ENSMUSG00000031264/ENSMUSG00000020573/ENSMUSG00000060063/ENSMUSG00000059498/ENSMUSG00000026656/ENSMUSG00000015947/ENSMUSG00000040026/ENSMUSG00000025473
GO:0045577	regulation of B cell differentiation	6/222	40/23133	0.15	15.6304	9.11606	2.13375e-06	2.92788e-05	2.02879e-05	ENSMUSG00000112148/ENSMUSG00000002111/ENSMUSG00000022488/ENSMUSG00000021457/ENSMUSG00000026288/ENSMUSG00000004266
GO:0002823	negative regulation of adaptive immune response based on somatic recombination of immune receptors built from immunoglobulin superfamily domains	7/222	62/23133	0.112903	11.7648	8.35469	2.14259e-06	2.92788e-05	2.02879e-05	ENSMUSG00000112148/ENSMUSG00000022488/ENSMUSG00000112023/ENSMUSG00000026656/ENSMUSG00000020399/ENSMUSG00000004266/ENSMUSG00000028369
GO:0031663	lipopolysaccharide-mediated signaling pathway	7/222	62/23133	0.112903	11.7648	8.35469	2.14259e-06	2.92788e-05	2.02879e-05	ENSMUSG00000022126/ENSMUSG00000038147/ENSMUSG00000002111/ENSMUSG00000023992/ENSMUSG00000021423/ENSMUSG00000021624/ENSMUSG00000020227
GO:0019884	antigen processing and presentation of exogenous antigen	6/222	41/23133	0.146341	15.2492	8.98901	2.47962e-06	3.37296e-05	2.33719e-05	ENSMUSG00000058715/ENSMUSG00000038642/ENSMUSG00000059498/ENSMUSG00000026656/ENSMUSG00000015947/ENSMUSG00000046805
GO:0042590	antigen processing and presentation of exogenous peptide antigen via MHC class I	4/222	11/23133	0.363636	37.8919	12.0469	2.58417e-06	3.48593e-05	2.41547e-05	ENSMUSG00000058715/ENSMUSG00000059498/ENSMUSG00000015947/ENSMUSG00000046805
GO:0002262	myeloid cell homeostasis	12/222	231/23133	0.0519481	5.41313	6.63555	2.58607e-06	3.48593e-05	2.41547e-05	ENSMUSG00000030786/ENSMUSG00000112148/ENSMUSG00000024621/ENSMUSG00000058715/ENSMUSG00000002111/ENSMUSG00000031264/ENSMUSG00000022488/ENSMUSG00000026656/ENSMUSG00000022831/ENSMUSG00000033220/ENSMUSG00000026288/ENSMUSG00000032698
GO:0002367	cytokine production involved in immune response	10/222	158/23133	0.0632911	6.59511	6.94657	3.13853e-06	4.21156e-05	2.91828e-05	ENSMUSG00000112148/ENSMUSG00000058715/ENSMUSG00000026177/ENSMUSG00000044583/ENSMUSG00000112023/ENSMUSG00000002603/ENSMUSG00000031101/ENSMUSG00000021457/ENSMUSG00000020227/ENSMUSG00000029771
GO:0032418	lysosome localization	8/222	93/23133	0.0860215	8.96367	7.57486	3.20622e-06	4.24503e-05	2.94147e-05	ENSMUSG00000058715/ENSMUSG00000038147/ENSMUSG00000031264/ENSMUSG00000021457/ENSMUSG00000033220/ENSMUSG00000040528/ENSMUSG00000053158/ENSMUSG00000040751
GO:0045670	regulation of osteoclast differentiation	8/222	93/23133	0.0860215	8.96367	7.57486	3.20622e-06	4.24503e-05	2.94147e-05	ENSMUSG00000112148/ENSMUSG00000024621/ENSMUSG00000023992/ENSMUSG00000030579/ENSMUSG00000112023/ENSMUSG00000019122/ENSMUSG00000026288/ENSMUSG00000025473
GO:1990849	vacuolar localization	8/222	93/23133	0.0860215	8.96367	7.57486	3.20622e-06	4.24503e-05	2.94147e-05	ENSMUSG00000058715/ENSMUSG00000038147/ENSMUSG00000031264/ENSMUSG00000021457/ENSMUSG00000033220/ENSMUSG00000040528/ENSMUSG00000053158/ENSMUSG00000040751
GO:0033627	cell adhesion mediated by integrin	8/222	94/23133	0.0851064	8.86832	7.52445	3.47582e-06	4.58162e-05	3.1747e-05	ENSMUSG00000030786/ENSMUSG00000022488/ENSMUSG00000000290/ENSMUSG00000024965/ENSMUSG00000021457/ENSMUSG00000030830/ENSMUSG00000021822/ENSMUSG00000004266
GO:1903305	regulation of regulated secretory pathway	10/222	160/23133	0.0625	6.51267	6.8877	3.51347e-06	4.61085e-05	3.19496e-05	ENSMUSG00000030786/ENSMUSG00000058715/ENSMUSG00000038147/ENSMUSG00000002111/ENSMUSG00000022488/ENSMUSG00000000290/ENSMUSG00000021457/ENSMUSG00000033220/ENSMUSG00000053158/ENSMUSG00000024261
GO:0002820	negative regulation of adaptive immune response	7/222	67/23133	0.104478	10.8868	7.97756	3.63798e-06	4.75331e-05	3.29367e-05	ENSMUSG00000112148/ENSMUSG00000022488/ENSMUSG00000112023/ENSMUSG00000026656/ENSMUSG00000020399/ENSMUSG00000004266/ENSMUSG00000028369
GO:0030183	B cell differentiation	10/222	161/23133	0.0621118	6.47222	6.85864	3.71511e-06	4.83288e-05	3.34881e-05	ENSMUSG00000112148/ENSMUSG00000002111/ENSMUSG00000031264/ENSMUSG00000022488/ENSMUSG00000021457/ENSMUSG00000026288/ENSMUSG00000041515/ENSMUSG00000076617/ENSMUSG00000004266/ENSMUSG00000032436
GO:0050871	positive regulation of B cell activation	8/222	95/23133	0.0842105	8.77496	7.47479	3.76441e-06	4.87573e-05	3.37849e-05	ENSMUSG00000002111/ENSMUSG00000031264/ENSMUSG00000022488/ENSMUSG00000002603/ENSMUSG00000031101/ENSMUSG00000021457/ENSMUSG00000026288/ENSMUSG00000076617
GO:0002866	positive regulation of acute inflammatory response to antigenic stimulus	4/222	12/23133	0.333333	34.7342	11.5059	3.84708e-06	4.91865e-05	3.40823e-05	ENSMUSG00000058715/ENSMUSG00000031264/ENSMUSG00000059498/ENSMUSG00000015947
GO:0033004	negative regulation of mast cell activation	4/222	12/23133	0.333333	34.7342	11.5059	3.84708e-06	4.91865e-05	3.40823e-05	ENSMUSG00000112148/ENSMUSG00000038147/ENSMUSG00000040528/ENSMUSG00000004266
GO:0043313	regulation of neutrophil degranulation	4/222	12/23133	0.333333	34.7342	11.5059	3.84708e-06	4.91865e-05	3.40823e-05	ENSMUSG00000030786/ENSMUSG00000002111/ENSMUSG00000000290/ENSMUSG00000021457
GO:0031589	cell-substrate adhesion	15/222	377/23133	0.0397878	4.146	6.06236	4.01643e-06	5.09936e-05	3.53345e-05	ENSMUSG00000030786/ENSMUSG00000022548/ENSMUSG00000000290/ENSMUSG00000024965/ENSMUSG00000033220/ENSMUSG00000020437/ENSMUSG00000029304/ENSMUSG00000030707/ENSMUSG00000030830/ENSMUSG00000000530/ENSMUSG00000021822/ENSMUSG00000025473/ENSMUSG00000005397/ENSMUSG00000028369/ENSMUSG00000064080
GO:1905517	macrophage migration	7/222	68/23133	0.102941	10.7267	7.9069	4.02266e-06	5.09936e-05	3.53345e-05	ENSMUSG00000052336/ENSMUSG00000024621/ENSMUSG00000023992/ENSMUSG00000049130/ENSMUSG00000040552/ENSMUSG00000017737/ENSMUSG00000042190
GO:1900016	negative regulation of cytokine production involved in inflammatory response	5/222	26/23133	0.192308	20.039	9.56136	4.34248e-06	5.48147e-05	3.79822e-05	ENSMUSG00000112148/ENSMUSG00000022548/ENSMUSG00000023992/ENSMUSG00000112023/ENSMUSG00000031659
GO:0072678	T cell migration	7/222	70/23133	0.1	10.4203	7.7699	4.89414e-06	6.15175e-05	4.26267e-05	ENSMUSG00000022548/ENSMUSG00000024397/ENSMUSG00000020437/ENSMUSG00000030707/ENSMUSG00000052085/ENSMUSG00000030830/ENSMUSG00000025473
GO:0071402	cellular response to lipoprotein particle stimulus	6/222	46/23133	0.130435	13.5917	8.41471	4.96304e-06	6.21214e-05	4.30452e-05	ENSMUSG00000058715/ENSMUSG00000023992/ENSMUSG00000002603/ENSMUSG00000000290/ENSMUSG00000018774/ENSMUSG00000021457
GO:0032649	regulation of type II interferon production	9/222	131/23133	0.0687023	7.15896	6.9586	5.03915e-06	6.28102e-05	4.35225e-05	ENSMUSG00000112148/ENSMUSG00000026177/ENSMUSG00000040522/ENSMUSG00000044583/ENSMUSG00000112023/ENSMUSG00000031101/ENSMUSG00000020399/ENSMUSG00000041515/ENSMUSG00000079685
GO:0046631	alpha-beta T cell activation	11/222	206/23133	0.0533981	5.56422	6.47721	5.23273e-06	6.49513e-05	4.50061e-05	ENSMUSG00000004707/ENSMUSG00000112148/ENSMUSG00000051506/ENSMUSG00000022488/ENSMUSG00000052142/ENSMUSG00000112023/ENSMUSG00000002603/ENSMUSG00000031101/ENSMUSG00000021457/ENSMUSG00000020143/ENSMUSG00000031103
GO:0051897	positive regulation of phosphatidylinositol 3-kinase/protein kinase B signal transduction	11/222	207/23133	0.0531401	5.53734	6.45481	5.48042e-06	6.76109e-05	4.6849e-05	ENSMUSG00000052336/ENSMUSG00000034116/ENSMUSG00000024621/ENSMUSG00000023992/ENSMUSG00000020573/ENSMUSG00000002603/ENSMUSG00000022831/ENSMUSG00000048583/ENSMUSG00000025017/ENSMUSG00000004266/ENSMUSG00000025473
GO:0002291	T cell activation via T cell receptor contact with antigen bound to MHC molecule on antigen presenting cell	4/222	13/23133	0.307692	32.0624	11.0274	5.51509e-06	6.76109e-05	4.6849e-05	ENSMUSG00000023992/ENSMUSG00000030579/ENSMUSG00000020399/ENSMUSG00000030830
GO:0140970	AIM2 inflammasome complex assembly	4/222	13/23133	0.307692	32.0624	11.0274	5.51509e-06	6.76109e-05	4.6849e-05	ENSMUSG00000073490/ENSMUSG00000037860/ENSMUSG00000039997/ENSMUSG00000090272
GO:1902624	positive regulation of neutrophil migration	6/222	47/23133	0.12766	13.3025	8.31052	5.64403e-06	6.89081e-05	4.77479e-05	ENSMUSG00000024300/ENSMUSG00000022488/ENSMUSG00000049130/ENSMUSG00000040552/ENSMUSG00000033220/ENSMUSG00000025473
GO:0043491	phosphatidylinositol 3-kinase/protein kinase B signal transduction	14/222	340/23133	0.0411765	4.2907	6.01711	5.73708e-06	6.97582e-05	4.83369e-05	ENSMUSG00000052336/ENSMUSG00000034116/ENSMUSG00000024621/ENSMUSG00000023992/ENSMUSG00000020573/ENSMUSG00000002603/ENSMUSG00000022831/ENSMUSG00000048583/ENSMUSG00000024066/ENSMUSG00000037860/ENSMUSG00000025017/ENSMUSG00000004266/ENSMUSG00000025473/ENSMUSG00000024529
GO:0072676	lymphocyte migration	8/222	101/23133	0.0792079	8.25368	7.19141	5.95814e-06	7.21517e-05	4.99954e-05	ENSMUSG00000050370/ENSMUSG00000022548/ENSMUSG00000024397/ENSMUSG00000020437/ENSMUSG00000030707/ENSMUSG00000052085/ENSMUSG00000030830/ENSMUSG00000025473
GO:0002718	regulation of cytokine production involved in immune response	9/222	134/23133	0.0671642	6.99869	6.85512	6.06563e-06	7.31559e-05	5.06913e-05	ENSMUSG00000112148/ENSMUSG00000058715/ENSMUSG00000044583/ENSMUSG00000112023/ENSMUSG00000002603/ENSMUSG00000031101/ENSMUSG00000021457/ENSMUSG00000020227/ENSMUSG00000029771
GO:0042100	B cell proliferation	8/222	102/23133	0.0784314	8.17276	7.14646	6.4124e-06	7.70263e-05	5.33731e-05	ENSMUSG00000031264/ENSMUSG00000022488/ENSMUSG00000030579/ENSMUSG00000026656/ENSMUSG00000031101/ENSMUSG00000021624/ENSMUSG00000026288/ENSMUSG00000076617
GO:0006959	humoral immune response	13/222	297/23133	0.043771	4.56106	6.08007	6.46963e-06	7.70504e-05	5.33898e-05	ENSMUSG00000022126/ENSMUSG00000036887/ENSMUSG00000023992/ENSMUSG00000030798/ENSMUSG00000026656/ENSMUSG00000069792/ENSMUSG00000019122/ENSMUSG00000076617/ENSMUSG00000004266/ENSMUSG00000001128/ENSMUSG00000018927/ENSMUSG00000025701/ENSMUSG00000028369
GO:0018108	peptidyl-tyrosine phosphorylation	13/222	297/23133	0.043771	4.56106	6.08007	6.46963e-06	7.70504e-05	5.33898e-05	ENSMUSG00000112148/ENSMUSG00000024621/ENSMUSG00000031264/ENSMUSG00000023992/ENSMUSG00000112023/ENSMUSG00000002603/ENSMUSG00000000290/ENSMUSG00000022831/ENSMUSG00000021457/ENSMUSG00000053158/ENSMUSG00000076617/ENSMUSG00000004266/ENSMUSG00000003283
GO:0030888	regulation of B cell proliferation	7/222	73/23133	0.0958904	9.99204	7.57445	6.49199e-06	7.70504e-05	5.33898e-05	ENSMUSG00000031264/ENSMUSG00000022488/ENSMUSG00000030579/ENSMUSG00000026656/ENSMUSG00000031101/ENSMUSG00000026288/ENSMUSG00000076617
GO:0030217	T cell differentiation	14/222	345/23133	0.0405797	4.22852	5.94731	6.7749e-06	8.0089e-05	5.54953e-05	ENSMUSG00000004707/ENSMUSG00000034116/ENSMUSG00000112148/ENSMUSG00000058715/ENSMUSG00000002111/ENSMUSG00000022488/ENSMUSG00000112023/ENSMUSG00000002603/ENSMUSG00000030144/ENSMUSG00000031101/ENSMUSG00000021457/ENSMUSG00000025473/ENSMUSG00000020143/ENSMUSG00000032092
GO:1905521	regulation of macrophage migration	6/222	49/23133	0.122449	12.7595	8.11135	7.23381e-06	8.5176e-05	5.90202e-05	ENSMUSG00000052336/ENSMUSG00000024621/ENSMUSG00000023992/ENSMUSG00000049130/ENSMUSG00000040552/ENSMUSG00000042190
GO:0050728	negative regulation of inflammatory response	10/222	174/23133	0.0574713	5.98866	6.50194	7.40738e-06	8.68763e-05	6.01984e-05	ENSMUSG00000052336/ENSMUSG00000022126/ENSMUSG00000023992/ENSMUSG00000021322/ENSMUSG00000026656/ENSMUSG00000030474/ENSMUSG00000004266/ENSMUSG00000031103/ENSMUSG00000025701/ENSMUSG00000034708
GO:0018212	peptidyl-tyrosine modification	13/222	301/23133	0.0431894	4.50045	6.01722	7.47089e-06	8.72776e-05	6.04765e-05	ENSMUSG00000112148/ENSMUSG00000024621/ENSMUSG00000031264/ENSMUSG00000023992/ENSMUSG00000112023/ENSMUSG00000002603/ENSMUSG00000000290/ENSMUSG00000022831/ENSMUSG00000021457/ENSMUSG00000053158/ENSMUSG00000076617/ENSMUSG00000004266/ENSMUSG00000003283
GO:0036006	cellular response to macrophage colony-stimulating factor stimulus	4/222	14/23133	0.285714	29.7722	10.6002	7.66305e-06	8.91727e-05	6.17896e-05	ENSMUSG00000030653/ENSMUSG00000110195/ENSMUSG00000024621/ENSMUSG00000023992
GO:0032479	regulation of type I interferon production	9/222	139/23133	0.0647482	6.74694	6.68956	8.17508e-06	9.47609e-05	6.56618e-05	ENSMUSG00000027322/ENSMUSG00000022126/ENSMUSG00000040522/ENSMUSG00000044583/ENSMUSG00000030579/ENSMUSG00000021457/ENSMUSG00000020399/ENSMUSG00000041515/ENSMUSG00000029771
GO:0009615	response to virus	15/222	403/23133	0.0372208	3.87851	5.73828	8.93539e-06	0.000103173	7.14904e-05	ENSMUSG00000022126/ENSMUSG00000051506/ENSMUSG00000040522/ENSMUSG00000030798/ENSMUSG00000033777/ENSMUSG00000044583/ENSMUSG00000002603/ENSMUSG00000073490/ENSMUSG00000066800/ENSMUSG00000037860/ENSMUSG00000039997/ENSMUSG00000020227/ENSMUSG00000029771/ENSMUSG00000090272/ENSMUSG00000033450
GO:0002920	regulation of humoral immune response	6/222	51/23133	0.117647	12.2591	7.92346	9.16859e-06	0.000105051	7.27919e-05	ENSMUSG00000022126/ENSMUSG00000023992/ENSMUSG00000030798/ENSMUSG00000026656/ENSMUSG00000004266/ENSMUSG00000028369
GO:0046456	icosanoid biosynthetic process	6/222	51/23133	0.117647	12.2591	7.92346	9.16859e-06	0.000105051	7.27919e-05	ENSMUSG00000060063/ENSMUSG00000029925/ENSMUSG00000021457/ENSMUSG00000047250/ENSMUSG00000029919/ENSMUSG00000025701
GO:0048771	tissue remodeling	11/222	220/23133	0.05	5.21014	6.17629	9.76514e-06	0.000111457	7.7231e-05	ENSMUSG00000029816/ENSMUSG00000024621/ENSMUSG00000038642/ENSMUSG00000054675/ENSMUSG00000021457/ENSMUSG00000017737/ENSMUSG00000033220/ENSMUSG00000026288/ENSMUSG00000029304/ENSMUSG00000000530/ENSMUSG00000025473
GO:0002714	positive regulation of B cell mediated immunity	6/222	52/23133	0.115385	12.0234	7.8334	1.0282e-05	0.000116083	8.04364e-05	ENSMUSG00000058715/ENSMUSG00000031264/ENSMUSG00000023992/ENSMUSG00000059498/ENSMUSG00000015947/ENSMUSG00000002603
GO:0002891	positive regulation of immunoglobulin mediated immune response	6/222	52/23133	0.115385	12.0234	7.8334	1.0282e-05	0.000116083	8.04364e-05	ENSMUSG00000058715/ENSMUSG00000031264/ENSMUSG00000023992/ENSMUSG00000059498/ENSMUSG00000015947/ENSMUSG00000002603
GO:0032606	type I interferon production	9/222	143/23133	0.0629371	6.55821	6.56288	1.02873e-05	0.000116083	8.04364e-05	ENSMUSG00000027322/ENSMUSG00000022126/ENSMUSG00000040522/ENSMUSG00000044583/ENSMUSG00000030579/ENSMUSG00000021457/ENSMUSG00000020399/ENSMUSG00000041515/ENSMUSG00000029771
GO:0032494	response to peptidoglycan	4/222	15/23133	0.266667	27.7874	10.2156	1.0371e-05	0.000116586	8.0785e-05	ENSMUSG00000023992/ENSMUSG00000049130/ENSMUSG00000020227/ENSMUSG00000029771
GO:0046849	bone remodeling	8/222	109/23133	0.0733945	7.6479	6.84808	1.04891e-05	0.00011747	8.13974e-05	ENSMUSG00000024621/ENSMUSG00000038642/ENSMUSG00000054675/ENSMUSG00000021457/ENSMUSG00000033220/ENSMUSG00000026288/ENSMUSG00000029304/ENSMUSG00000025473
GO:0006910	phagocytosis, recognition	5/222	31/23133	0.16129	16.8069	8.66889	1.07869e-05	0.000120353	8.33949e-05	ENSMUSG00000023992/ENSMUSG00000059498/ENSMUSG00000015947/ENSMUSG00000001128/ENSMUSG00000036103
GO:0032609	type II interferon production	9/222	144/23133	0.0625	6.51267	6.53197	1.08828e-05	0.00012097	8.38226e-05	ENSMUSG00000112148/ENSMUSG00000026177/ENSMUSG00000040522/ENSMUSG00000044583/ENSMUSG00000112023/ENSMUSG00000031101/ENSMUSG00000020399/ENSMUSG00000041515/ENSMUSG00000079685
GO:0045124	regulation of bone resorption	6/222	53/23133	0.113208	11.7965	7.74578	1.15024e-05	0.000127382	8.82653e-05	ENSMUSG00000024621/ENSMUSG00000054675/ENSMUSG00000021457/ENSMUSG00000026288/ENSMUSG00000029304/ENSMUSG00000025473
GO:0045621	positive regulation of lymphocyte differentiation	9/222	146/23133	0.0616438	6.42345	6.47101	1.21626e-05	0.000134194	9.29857e-05	ENSMUSG00000112148/ENSMUSG00000002111/ENSMUSG00000022488/ENSMUSG00000112023/ENSMUSG00000002603/ENSMUSG00000031101/ENSMUSG00000021457/ENSMUSG00000026288/ENSMUSG00000025473
GO:0051345	positive regulation of hydrolase activity	14/222	365/23133	0.0383562	3.99682	5.68074	1.27899e-05	0.000140595	9.74209e-05	ENSMUSG00000034116/ENSMUSG00000073490/ENSMUSG00000021457/ENSMUSG00000024066/ENSMUSG00000037860/ENSMUSG00000039997/ENSMUSG00000024451/ENSMUSG00000020120/ENSMUSG00000030844/ENSMUSG00000052085/ENSMUSG00000021886/ENSMUSG00000090272/ENSMUSG00000032356/ENSMUSG00000034708
GO:0002430	complement receptor mediated signaling pathway	4/222	16/23133	0.25	26.0507	9.86676	1.37241e-05	0.000149759	0.000103771	ENSMUSG00000030786/ENSMUSG00000049130/ENSMUSG00000040552/ENSMUSG00000042190
GO:0036005	response to macrophage colony-stimulating factor	4/222	16/23133	0.25	26.0507	9.86676	1.37241e-05	0.000149759	0.000103771	ENSMUSG00000030653/ENSMUSG00000110195/ENSMUSG00000024621/ENSMUSG00000023992
GO:0002455	humoral immune response mediated by circulating immunoglobulin	6/222	55/23133	0.109091	11.3676	7.5774	1.42946e-05	0.000155414	0.00010769	ENSMUSG00000036887/ENSMUSG00000023992/ENSMUSG00000026656/ENSMUSG00000076617/ENSMUSG00000004266/ENSMUSG00000028369
GO:0032691	negative regulation of interleukin-1 beta production	5/222	33/23133	0.151515	15.7883	8.36816	1.48339e-05	0.000160692	0.000111347	ENSMUSG00000052336/ENSMUSG00000112148/ENSMUSG00000023992/ENSMUSG00000112023/ENSMUSG00000031103
GO:0001780	neutrophil homeostasis	5/222	34/23133	0.147059	15.3239	8.22746	1.72562e-05	0.000184915	0.000128131	ENSMUSG00000030786/ENSMUSG00000112148/ENSMUSG00000024621/ENSMUSG00000031264/ENSMUSG00000026656
GO:0001911	negative regulation of leukocyte mediated cytotoxicity	5/222	34/23133	0.147059	15.3239	8.22746	1.72562e-05	0.000184915	0.000128131	ENSMUSG00000052336/ENSMUSG00000022488/ENSMUSG00000002603/ENSMUSG00000048583/ENSMUSG00000020399
GO:0002438	acute inflammatory response to antigenic stimulus	5/222	34/23133	0.147059	15.3239	8.22746	1.72562e-05	0.000184915	0.000128131	ENSMUSG00000058715/ENSMUSG00000031264/ENSMUSG00000059498/ENSMUSG00000026656/ENSMUSG00000015947
GO:0007162	negative regulation of cell adhesion	13/222	326/23133	0.0398773	4.15532	5.6478	1.74382e-05	0.000186195	0.000129018	ENSMUSG00000029816/ENSMUSG00000024300/ENSMUSG00000112148/ENSMUSG00000022548/ENSMUSG00000002111/ENSMUSG00000030798/ENSMUSG00000112023/ENSMUSG00000002603/ENSMUSG00000020399/ENSMUSG00000000530/ENSMUSG00000004266/ENSMUSG00000025473/ENSMUSG00000090958
GO:0034134	toll-like receptor 2 signaling pathway	4/222	17/23133	0.235294	24.5183	9.54849	1.78121e-05	0.000188488	0.000130607	ENSMUSG00000022126/ENSMUSG00000023992/ENSMUSG00000025017/ENSMUSG00000044827
GO:0098883	synapse pruning	4/222	17/23133	0.235294	24.5183	9.54849	1.78121e-05	0.000188488	0.000130607	ENSMUSG00000052336/ENSMUSG00000030786/ENSMUSG00000036887/ENSMUSG00000023992
GO:0034103	regulation of tissue remodeling	7/222	85/23133	0.0823529	8.5814	6.89292	1.78427e-05	0.000188488	0.000130607	ENSMUSG00000029816/ENSMUSG00000024621/ENSMUSG00000054675/ENSMUSG00000021457/ENSMUSG00000026288/ENSMUSG00000029304/ENSMUSG00000025473
GO:0032729	positive regulation of type II interferon production	7/222	86/23133	0.0813953	8.48162	6.84224	1.9267e-05	0.000202814	0.000140534	ENSMUSG00000026177/ENSMUSG00000040522/ENSMUSG00000044583/ENSMUSG00000031101/ENSMUSG00000020399/ENSMUSG00000041515/ENSMUSG00000079685
GO:1902622	regulation of neutrophil migration	6/222	58/23133	0.103448	10.7796	7.34049	1.94858e-05	0.000204395	0.00014163	ENSMUSG00000024300/ENSMUSG00000022488/ENSMUSG00000049130/ENSMUSG00000040552/ENSMUSG00000033220/ENSMUSG00000025473
GO:0043304	regulation of mast cell degranulation	5/222	35/23133	0.142857	14.8861	8.0926	1.99758e-05	0.000208799	0.000144681	ENSMUSG00000058715/ENSMUSG00000038147/ENSMUSG00000021457/ENSMUSG00000033220/ENSMUSG00000053158
GO:0002863	positive regulation of inflammatory response to antigenic stimulus	4/222	18/23133	0.222222	23.1562	9.25646	2.27292e-05	0.000235924	0.000163477	ENSMUSG00000058715/ENSMUSG00000031264/ENSMUSG00000059498/ENSMUSG00000015947
GO:0014004	microglia differentiation	4/222	18/23133	0.222222	23.1562	9.25646	2.27292e-05	0.000235924	0.000163477	ENSMUSG00000030786/ENSMUSG00000024621/ENSMUSG00000002603/ENSMUSG00000052384
GO:0006898	receptor-mediated endocytosis	12/222	287/23133	0.0418118	4.35691	5.63296	2.31752e-05	0.000239718	0.000166106	ENSMUSG00000026712/ENSMUSG00000027322/ENSMUSG00000026390/ENSMUSG00000030786/ENSMUSG00000112148/ENSMUSG00000058715/ENSMUSG00000025044/ENSMUSG00000112023/ENSMUSG00000026656/ENSMUSG00000015947/ENSMUSG00000000290/ENSMUSG00000021457
GO:0051056	regulation of small GTPase mediated signal transduction	11/222	243/23133	0.0452675	4.71699	5.73368	2.46555e-05	0.000254148	0.000176104	ENSMUSG00000035697/ENSMUSG00000030220/ENSMUSG00000052142/ENSMUSG00000020573/ENSMUSG00000026979/ENSMUSG00000030047/ENSMUSG00000018008/ENSMUSG00000052085/ENSMUSG00000033450/ENSMUSG00000020143/ENSMUSG00000032356
GO:1903038	negative regulation of leukocyte cell-cell adhesion	9/222	160/23133	0.05625	5.8614	6.07399	2.52607e-05	0.000259488	0.000179805	ENSMUSG00000029816/ENSMUSG00000112148/ENSMUSG00000030798/ENSMUSG00000112023/ENSMUSG00000002603/ENSMUSG00000020399/ENSMUSG00000004266/ENSMUSG00000025473/ENSMUSG00000090958
GO:0042267	natural killer cell mediated cytotoxicity	7/222	90/23133	0.0777778	8.10465	6.64746	2.59362e-05	0.000265512	0.000183979	ENSMUSG00000034116/ENSMUSG00000002603/ENSMUSG00000048583/ENSMUSG00000020399/ENSMUSG00000030707/ENSMUSG00000004266/ENSMUSG00000079685
GO:0050832	defense response to fungus	6/222	61/23133	0.0983607	10.2494	7.12031	2.6099e-05	0.000266264	0.0001845	ENSMUSG00000052336/ENSMUSG00000002111/ENSMUSG00000015950/ENSMUSG00000002603/ENSMUSG00000030144/ENSMUSG00000049037
GO:0050869	negative regulation of B cell activation	5/222	37/23133	0.135135	14.0814	7.83879	2.6407e-05	0.000268486	0.000186039	ENSMUSG00000112148/ENSMUSG00000031264/ENSMUSG00000030579/ENSMUSG00000026656/ENSMUSG00000026288
GO:0007264	small GTPase-mediated signal transduction	15/222	443/23133	0.03386	3.52831	5.28903	2.70184e-05	0.000273768	0.0001897	ENSMUSG00000034116/ENSMUSG00000035697/ENSMUSG00000048865/ENSMUSG00000030220/ENSMUSG00000052142/ENSMUSG00000020573/ENSMUSG00000024397/ENSMUSG00000026979/ENSMUSG00000030047/ENSMUSG00000033220/ENSMUSG00000018008/ENSMUSG00000052085/ENSMUSG00000033450/ENSMUSG00000020143/ENSMUSG00000032356
GO:0002824	positive regulation of adaptive immune response based on somatic recombination of immune receptors built from immunoglobulin superfamily domains	9/222	162/23133	0.0555556	5.78904	6.02112	2.78664e-05	0.000280498	0.000194363	ENSMUSG00000058715/ENSMUSG00000026177/ENSMUSG00000031264/ENSMUSG00000023992/ENSMUSG00000059498/ENSMUSG00000015947/ENSMUSG00000002603/ENSMUSG00000031101/ENSMUSG00000079685
GO:0002637	regulation of immunoglobulin production	7/222	91/23133	0.0769231	8.01559	6.60064	2.78709e-05	0.000280498	0.000194363	ENSMUSG00000112148/ENSMUSG00000031264/ENSMUSG00000030798/ENSMUSG00000026656/ENSMUSG00000002603/ENSMUSG00000031101/ENSMUSG00000076617
GO:0043030	regulation of macrophage activation	6/222	62/23133	0.0967742	10.0841	7.05029	2.86658e-05	0.000287527	0.000199233	ENSMUSG00000038147/ENSMUSG00000023992/ENSMUSG00000020399/ENSMUSG00000030560/ENSMUSG00000079685/ENSMUSG00000034708
GO:0002708	positive regulation of lymphocyte mediated immunity	9/222	164/23133	0.054878	5.71844	5.96912	3.06966e-05	0.000306863	0.000212632	ENSMUSG00000034116/ENSMUSG00000058715/ENSMUSG00000031264/ENSMUSG00000023992/ENSMUSG00000059498/ENSMUSG00000015947/ENSMUSG00000002603/ENSMUSG00000031101/ENSMUSG00000079685
GO:0046850	regulation of bone remodeling	6/222	63/23133	0.0952381	9.92407	6.98185	3.14316e-05	0.000313159	0.000216995	ENSMUSG00000024621/ENSMUSG00000054675/ENSMUSG00000021457/ENSMUSG00000026288/ENSMUSG00000029304/ENSMUSG00000025473
GO:0002456	T cell mediated immunity	9/222	166/23133	0.0542169	5.64954	5.91798	3.37668e-05	0.000335304	0.000232339	ENSMUSG00000112148/ENSMUSG00000026177/ENSMUSG00000022488/ENSMUSG00000112023/ENSMUSG00000031101/ENSMUSG00000020437/ENSMUSG00000030560/ENSMUSG00000079685/ENSMUSG00000039316
GO:0031342	negative regulation of cell killing	5/222	39/23133	0.128205	13.3593	7.60393	3.43399e-05	0.000338982	0.000234887	ENSMUSG00000052336/ENSMUSG00000022488/ENSMUSG00000002603/ENSMUSG00000048583/ENSMUSG00000020399
GO:0032655	regulation of interleukin-12 production	6/222	64/23133	0.09375	9.769	6.91492	3.44076e-05	0.000338982	0.000234887	ENSMUSG00000040522/ENSMUSG00000021457/ENSMUSG00000020227/ENSMUSG00000041515/ENSMUSG00000042190/ENSMUSG00000001741
GO:0001894	tissue homeostasis	12/222	299/23133	0.0401338	4.18205	5.45145	3.45923e-05	0.000338982	0.000234887	ENSMUSG00000024621/ENSMUSG00000038642/ENSMUSG00000054675/ENSMUSG00000031101/ENSMUSG00000021457/ENSMUSG00000022371/ENSMUSG00000033220/ENSMUSG00000026288/ENSMUSG00000029304/ENSMUSG00000030707/ENSMUSG00000047250/ENSMUSG00000025473
GO:0060249	anatomical structure homeostasis	12/222	299/23133	0.0401338	4.18205	5.45145	3.45923e-05	0.000338982	0.000234887	ENSMUSG00000024621/ENSMUSG00000038642/ENSMUSG00000054675/ENSMUSG00000031101/ENSMUSG00000021457/ENSMUSG00000022371/ENSMUSG00000033220/ENSMUSG00000026288/ENSMUSG00000029304/ENSMUSG00000030707/ENSMUSG00000047250/ENSMUSG00000025473
GO:0002923	regulation of humoral immune response mediated by circulating immunoglobulin	4/222	20/23133	0.2	20.8405	8.73779	3.54494e-05	0.000342869	0.000237581	ENSMUSG00000023992/ENSMUSG00000026656/ENSMUSG00000004266/ENSMUSG00000028369
GO:0030889	negative regulation of B cell proliferation	4/222	20/23133	0.2	20.8405	8.73779	3.54494e-05	0.000342869	0.000237581	ENSMUSG00000031264/ENSMUSG00000030579/ENSMUSG00000026656/ENSMUSG00000026288
GO:0045579	positive regulation of B cell differentiation	4/222	20/23133	0.2	20.8405	8.73779	3.54494e-05	0.000342869	0.000237581	ENSMUSG00000002111/ENSMUSG00000022488/ENSMUSG00000021457/ENSMUSG00000026288
GO:0060099	regulation of phagocytosis, engulfment	4/222	20/23133	0.2	20.8405	8.73779	3.54494e-05	0.000342869	0.000237581	ENSMUSG00000023992/ENSMUSG00000022488/ENSMUSG00000015947/ENSMUSG00000030474
GO:0002228	natural killer cell mediated immunity	7/222	95/23133	0.0736842	7.67809	6.42027	3.68373e-05	0.00035514	0.000246084	ENSMUSG00000034116/ENSMUSG00000002603/ENSMUSG00000048583/ENSMUSG00000020399/ENSMUSG00000030707/ENSMUSG00000004266/ENSMUSG00000079685
GO:0030225	macrophage differentiation	6/222	65/23133	0.0923077	9.61871	6.84944	3.76057e-05	0.000360217	0.000249602	ENSMUSG00000030786/ENSMUSG00000024621/ENSMUSG00000002111/ENSMUSG00000002603/ENSMUSG00000022831/ENSMUSG00000052384
GO:0071622	regulation of granulocyte chemotaxis	6/222	65/23133	0.0923077	9.61871	6.84944	3.76057e-05	0.000360217	0.000249602	ENSMUSG00000024621/ENSMUSG00000022488/ENSMUSG00000049130/ENSMUSG00000040552/ENSMUSG00000033220/ENSMUSG00000042190
GO:0002821	positive regulation of adaptive immune response	9/222	170/23133	0.0529412	5.51661	5.81814	4.06928e-05	0.000388538	0.000269226	ENSMUSG00000058715/ENSMUSG00000026177/ENSMUSG00000031264/ENSMUSG00000023992/ENSMUSG00000059498/ENSMUSG00000015947/ENSMUSG00000002603/ENSMUSG00000031101/ENSMUSG00000079685
GO:0032615	interleukin-12 production	6/222	66/23133	0.0909091	9.47297	6.78537	4.10378e-05	0.000389337	0.000269779	ENSMUSG00000040522/ENSMUSG00000021457/ENSMUSG00000020227/ENSMUSG00000041515/ENSMUSG00000042190/ENSMUSG00000001741
GO:0032731	positive regulation of interleukin-1 beta production	6/222	66/23133	0.0909091	9.47297	6.78537	4.10378e-05	0.000389337	0.000269779	ENSMUSG00000040522/ENSMUSG00000030579/ENSMUSG00000073490/ENSMUSG00000037860/ENSMUSG00000039997/ENSMUSG00000090272
GO:0002643	regulation of tolerance induction	4/222	21/23133	0.190476	19.8481	8.5059	4.34617e-05	0.000409723	0.000283906	ENSMUSG00000112148/ENSMUSG00000112023/ENSMUSG00000020399/ENSMUSG00000020227
GO:1905153	regulation of membrane invagination	4/222	21/23133	0.190476	19.8481	8.5059	4.34617e-05	0.000409723	0.000283906	ENSMUSG00000023992/ENSMUSG00000022488/ENSMUSG00000015947/ENSMUSG00000030474
GO:0032692	negative regulation of interleukin-1 production	5/222	41/23133	0.121951	12.7076	7.3857	4.40048e-05	0.000413534	0.000286546	ENSMUSG00000052336/ENSMUSG00000112148/ENSMUSG00000023992/ENSMUSG00000112023/ENSMUSG00000031103
GO:0002260	lymphocyte homeostasis	7/222	98/23133	0.0714286	7.44305	6.29175	4.50129e-05	0.000421678	0.000292189	ENSMUSG00000058818/ENSMUSG00000022488/ENSMUSG00000002603/ENSMUSG00000031101/ENSMUSG00000037860/ENSMUSG00000030707/ENSMUSG00000102037
GO:0030224	monocyte differentiation	5/222	42/23133	0.119048	12.4051	7.2822	4.95636e-05	0.000462852	0.00032072	ENSMUSG00000073490/ENSMUSG00000026288/ENSMUSG00000053158/ENSMUSG00000039997/ENSMUSG00000090272
GO:0061760	antifungal innate immune response	4/222	22/23133	0.181818	18.9459	8.28952	5.27213e-05	0.000490802	0.000340087	ENSMUSG00000052336/ENSMUSG00000002111/ENSMUSG00000030144/ENSMUSG00000049037
GO:0022408	negative regulation of cell-cell adhesion	10/222	219/23133	0.0456621	4.75811	5.50051	5.37187e-05	0.00049853	0.000345442	ENSMUSG00000029816/ENSMUSG00000112148/ENSMUSG00000002111/ENSMUSG00000030798/ENSMUSG00000112023/ENSMUSG00000002603/ENSMUSG00000020399/ENSMUSG00000004266/ENSMUSG00000025473/ENSMUSG00000090958
GO:0017157	regulation of exocytosis	10/222	223/23133	0.044843	4.67277	5.42493	6.25128e-05	0.00057834	0.000400744	ENSMUSG00000030786/ENSMUSG00000058715/ENSMUSG00000038147/ENSMUSG00000002111/ENSMUSG00000022488/ENSMUSG00000000290/ENSMUSG00000021457/ENSMUSG00000033220/ENSMUSG00000053158/ENSMUSG00000024261
GO:0062207	regulation of pattern recognition receptor signaling pathway	9/222	181/23133	0.0497238	5.18135	5.55913	6.6216e-05	0.000610704	0.00042317	ENSMUSG00000022126/ENSMUSG00000031264/ENSMUSG00000023992/ENSMUSG00000073490/ENSMUSG00000039997/ENSMUSG00000020227/ENSMUSG00000025017/ENSMUSG00000090272/ENSMUSG00000044827
GO:0032660	regulation of interleukin-17 production	5/222	45/23133	0.111111	11.5781	6.99167	6.95405e-05	0.000639386	0.000443044	ENSMUSG00000004707/ENSMUSG00000031264/ENSMUSG00000022488/ENSMUSG00000002603/ENSMUSG00000039316
GO:0030168	platelet activation	7/222	105/23133	0.0666667	6.94685	6.01194	6.99794e-05	0.000641442	0.000444468	ENSMUSG00000058715/ENSMUSG00000024965/ENSMUSG00000021457/ENSMUSG00000042644/ENSMUSG00000020120/ENSMUSG00000004266/ENSMUSG00000028369
GO:0050868	negative regulation of T cell activation	8/222	143/23133	0.0559441	5.82952	5.70248	7.42627e-05	0.000678616	0.000470227	ENSMUSG00000029816/ENSMUSG00000112148/ENSMUSG00000030798/ENSMUSG00000112023/ENSMUSG00000002603/ENSMUSG00000020399/ENSMUSG00000004266/ENSMUSG00000090958
GO:0097028	dendritic cell differentiation	5/222	46/23133	0.108696	11.3264	6.90088	7.74157e-05	0.000705265	0.000488692	ENSMUSG00000058818/ENSMUSG00000002111/ENSMUSG00000023992/ENSMUSG00000002603/ENSMUSG00000041515
GO:0045859	regulation of protein kinase activity	15/222	487/23133	0.0308008	3.20953	4.85098	7.89026e-05	0.000716618	0.00049656	ENSMUSG00000062515/ENSMUSG00000112148/ENSMUSG00000024621/ENSMUSG00000026177/ENSMUSG00000049130/ENSMUSG00000020573/ENSMUSG00000112023/ENSMUSG00000002699/ENSMUSG00000021457/ENSMUSG00000020227/ENSMUSG00000019876/ENSMUSG00000024013/ENSMUSG00000057967/ENSMUSG00000004266/ENSMUSG00000044827
GO:0002224	toll-like receptor signaling pathway	6/222	75/23133	0.08	8.33622	6.26402	8.46555e-05	0.000766531	0.000531145	ENSMUSG00000040522/ENSMUSG00000033777/ENSMUSG00000044583/ENSMUSG00000020227/ENSMUSG00000025017/ENSMUSG00000044827
GO:0002701	negative regulation of production of molecular mediator of immune response	5/222	47/23133	0.106383	11.0854	6.81284	8.596e-05	0.000775984	0.000537696	ENSMUSG00000112148/ENSMUSG00000112023/ENSMUSG00000026656/ENSMUSG00000002603/ENSMUSG00000020227
GO:0045619	regulation of lymphocyte differentiation	10/222	232/23133	0.0431034	4.4915	5.26125	8.68722e-05	0.00078185	0.00054176	ENSMUSG00000112148/ENSMUSG00000002111/ENSMUSG00000022488/ENSMUSG00000112023/ENSMUSG00000002603/ENSMUSG00000031101/ENSMUSG00000021457/ENSMUSG00000026288/ENSMUSG00000004266/ENSMUSG00000025473
GO:0010759	positive regulation of macrophage chemotaxis	4/222	25/23133	0.16	16.6724	7.71767	8.91363e-05	0.00079981	0.000554205	ENSMUSG00000024621/ENSMUSG00000049130/ENSMUSG00000040552/ENSMUSG00000042190
GO:0007596	blood coagulation	9/222	189/23133	0.047619	4.96203	5.38363	9.22891e-05	0.000825613	0.000572084	ENSMUSG00000112148/ENSMUSG00000058715/ENSMUSG00000024965/ENSMUSG00000021457/ENSMUSG00000042644/ENSMUSG00000020120/ENSMUSG00000021822/ENSMUSG00000004266/ENSMUSG00000028369
GO:0032620	interleukin-17 production	5/222	48/23133	0.104167	10.8544	6.72743	9.52113e-05	0.00084667	0.000586675	ENSMUSG00000004707/ENSMUSG00000031264/ENSMUSG00000022488/ENSMUSG00000002603/ENSMUSG00000039316
GO:0048246	macrophage chemotaxis	5/222	48/23133	0.104167	10.8544	6.72743	9.52113e-05	0.00084667	0.000586675	ENSMUSG00000024621/ENSMUSG00000049130/ENSMUSG00000040552/ENSMUSG00000017737/ENSMUSG00000042190
GO:0032088	negative regulation of NF-kappaB transcription factor activity	6/222	77/23133	0.0779221	8.11969	6.15993	9.81047e-05	0.00086974	0.000602661	ENSMUSG00000022126/ENSMUSG00000002111/ENSMUSG00000037860/ENSMUSG00000020399/ENSMUSG00000020227/ENSMUSG00000042190
GO:0002702	positive regulation of production of molecular mediator of immune response	8/222	149/23133	0.0536913	5.59478	5.53867	9.90427e-05	0.00086974	0.000602661	ENSMUSG00000058715/ENSMUSG00000031264/ENSMUSG00000030798/ENSMUSG00000044583/ENSMUSG00000002603/ENSMUSG00000031101/ENSMUSG00000021457/ENSMUSG00000029771
GO:0030101	natural killer cell activation	7/222	111/23133	0.0630631	6.57134	5.79176	9.94797e-05	0.00086974	0.000602661	ENSMUSG00000034116/ENSMUSG00000112148/ENSMUSG00000030579/ENSMUSG00000020399/ENSMUSG00000030707/ENSMUSG00000079685/ENSMUSG00000031103
GO:0002924	negative regulation of humoral immune response mediated by circulating immunoglobulin	3/222	10/23133	0.3	31.2608	9.42149	9.95574e-05	0.00086974	0.000602661	ENSMUSG00000026656/ENSMUSG00000004266/ENSMUSG00000028369
GO:0043376	regulation of CD8-positive, alpha-beta T cell differentiation	3/222	10/23133	0.3	31.2608	9.42149	9.95574e-05	0.00086974	0.000602661	ENSMUSG00000112148/ENSMUSG00000022488/ENSMUSG00000112023
GO:0070305	response to cGMP	3/222	10/23133	0.3	31.2608	9.42149	9.95574e-05	0.00086974	0.000602661	ENSMUSG00000030653/ENSMUSG00000110195/ENSMUSG00000044583
GO:0002495	antigen processing and presentation of peptide antigen via MHC class II	4/222	26/23133	0.153846	16.0312	7.54865	0.000104553	0.00090542	0.000627384	ENSMUSG00000058715/ENSMUSG00000023992/ENSMUSG00000038642/ENSMUSG00000026656
GO:0141086	negative regulation of inflammasome-mediated signaling pathway	4/222	26/23133	0.153846	16.0312	7.54865	0.000104553	0.00090542	0.000627384	ENSMUSG00000023992/ENSMUSG00000073490/ENSMUSG00000039997/ENSMUSG00000090272
GO:1903306	negative regulation of regulated secretory pathway	4/222	26/23133	0.153846	16.0312	7.54865	0.000104553	0.00090542	0.000627384	ENSMUSG00000038147/ENSMUSG00000002111/ENSMUSG00000022488/ENSMUSG00000024261
GO:0007249	canonical NF-kappaB signal transduction	11/222	286/23133	0.0384615	4.0078	5.03823	0.000107096	0.000924754	0.000640781	ENSMUSG00000052336/ENSMUSG00000112148/ENSMUSG00000040522/ENSMUSG00000023992/ENSMUSG00000044583/ENSMUSG00000112023/ENSMUSG00000002603/ENSMUSG00000030144/ENSMUSG00000020227/ENSMUSG00000040026/ENSMUSG00000025473
GO:0007599	hemostasis	9/222	193/23133	0.0466321	4.85919	5.29956	0.000108259	0.000932096	0.000645868	ENSMUSG00000112148/ENSMUSG00000058715/ENSMUSG00000024965/ENSMUSG00000021457/ENSMUSG00000042644/ENSMUSG00000020120/ENSMUSG00000021822/ENSMUSG00000004266/ENSMUSG00000028369
GO:0050817	coagulation	9/222	194/23133	0.0463918	4.83415	5.2789	0.000112595	0.000966629	0.000669797	ENSMUSG00000112148/ENSMUSG00000058715/ENSMUSG00000024965/ENSMUSG00000021457/ENSMUSG00000042644/ENSMUSG00000020120/ENSMUSG00000021822/ENSMUSG00000004266/ENSMUSG00000028369
GO:0032623	interleukin-2 production	6/222	79/23133	0.0759494	7.91413	6.05953	0.0001132	0.000969028	0.00067146	ENSMUSG00000112148/ENSMUSG00000058715/ENSMUSG00000026177/ENSMUSG00000112023/ENSMUSG00000031101/ENSMUSG00000020399
GO:0007160	cell-matrix adhesion	10/222	241/23133	0.0414938	4.32376	5.10573	0.000118851	0.00101449	0.000702963	ENSMUSG00000030786/ENSMUSG00000022548/ENSMUSG00000000290/ENSMUSG00000024965/ENSMUSG00000030830/ENSMUSG00000000530/ENSMUSG00000021822/ENSMUSG00000025473/ENSMUSG00000005397/ENSMUSG00000028369
GO:0032753	positive regulation of interleukin-4 production	4/222	27/23133	0.148148	15.4374	7.38874	0.000121817	0.00103684	0.000718445	ENSMUSG00000058715/ENSMUSG00000031101/ENSMUSG00000021457/ENSMUSG00000020399
GO:0050730	regulation of peptidyl-tyrosine phosphorylation	10/222	242/23133	0.0413223	4.3059	5.08892	0.000122951	0.00104351	0.000723068	ENSMUSG00000112148/ENSMUSG00000024621/ENSMUSG00000023992/ENSMUSG00000112023/ENSMUSG00000002603/ENSMUSG00000000290/ENSMUSG00000022831/ENSMUSG00000021457/ENSMUSG00000076617/ENSMUSG00000004266
GO:0141085	regulation of inflammasome-mediated signaling pathway	5/222	51/23133	0.0980392	10.216	6.48559	0.000127604	0.00107992	0.000748298	ENSMUSG00000031264/ENSMUSG00000023992/ENSMUSG00000073490/ENSMUSG00000039997/ENSMUSG00000090272
GO:0046635	positive regulation of alpha-beta T cell activation	6/222	81/23133	0.0740741	7.71872	5.9626	0.000130082	0.00109778	0.000760672	ENSMUSG00000112148/ENSMUSG00000022488/ENSMUSG00000052142/ENSMUSG00000112023/ENSMUSG00000031101/ENSMUSG00000021457
GO:0002887	negative regulation of myeloid leukocyte mediated immunity	3/222	11/23133	0.272727	28.4189	8.95355	0.000135922	0.00113421	0.000785917	ENSMUSG00000052336/ENSMUSG00000038147/ENSMUSG00000002111
GO:0140971	regulation of AIM2 inflammasome complex assembly	3/222	11/23133	0.272727	28.4189	8.95355	0.000135922	0.00113421	0.000785917	ENSMUSG00000073490/ENSMUSG00000039997/ENSMUSG00000090272
GO:0150078	positive regulation of neuroinflammatory response	3/222	11/23133	0.272727	28.4189	8.95355	0.000135922	0.00113421	0.000785917	ENSMUSG00000024621/ENSMUSG00000023992/ENSMUSG00000030560
GO:2001187	positive regulation of CD8-positive, alpha-beta T cell activation	3/222	11/23133	0.272727	28.4189	8.95355	0.000135922	0.00113421	0.000785917	ENSMUSG00000112148/ENSMUSG00000022488/ENSMUSG00000112023
GO:0046637	regulation of alpha-beta T cell differentiation	6/222	82/23133	0.0731707	7.62459	5.91537	0.00013924	0.00115759	0.000802115	ENSMUSG00000112148/ENSMUSG00000022488/ENSMUSG00000112023/ENSMUSG00000002603/ENSMUSG00000031101/ENSMUSG00000021457
GO:0033628	regulation of cell adhesion mediated by integrin	5/222	52/23133	0.0961538	10.0195	6.4094	0.000140085	0.00115759	0.000802115	ENSMUSG00000022488/ENSMUSG00000024965/ENSMUSG00000021457/ENSMUSG00000021822/ENSMUSG00000004266
GO:2000404	regulation of T cell migration	5/222	52/23133	0.0961538	10.0195	6.4094	0.000140085	0.00115759	0.000802115	ENSMUSG00000022548/ENSMUSG00000024397/ENSMUSG00000030707/ENSMUSG00000052085/ENSMUSG00000025473
GO:0002504	antigen processing and presentation of peptide or polysaccharide antigen via MHC class II	4/222	28/23133	0.142857	14.8861	7.23715	0.000141055	0.00115759	0.000802115	ENSMUSG00000058715/ENSMUSG00000023992/ENSMUSG00000038642/ENSMUSG00000026656
GO:0002523	leukocyte migration involved in inflammatory response	4/222	28/23133	0.142857	14.8861	7.23715	0.000141055	0.00115759	0.000802115	ENSMUSG00000030786/ENSMUSG00000000290/ENSMUSG00000025473/ENSMUSG00000025701
GO:0032740	positive regulation of interleukin-17 production	4/222	28/23133	0.142857	14.8861	7.23715	0.000141055	0.00115759	0.000802115	ENSMUSG00000004707/ENSMUSG00000031264/ENSMUSG00000002603/ENSMUSG00000039316
GO:0045907	positive regulation of vasoconstriction	5/222	53/23133	0.0943396	9.83044	6.33525	0.000153479	0.00125608	0.000870364	ENSMUSG00000029925/ENSMUSG00000052821/ENSMUSG00000047250/ENSMUSG00000020681/ENSMUSG00000025701
GO:0043254	regulation of protein-containing complex assembly	14/222	461/23133	0.0303688	3.16451	4.62089	0.000158151	0.00129077	0.000894404	ENSMUSG00000031264/ENSMUSG00000023992/ENSMUSG00000022488/ENSMUSG00000002603/ENSMUSG00000022831/ENSMUSG00000073490/ENSMUSG00000021457/ENSMUSG00000021998/ENSMUSG00000053158/ENSMUSG00000039997/ENSMUSG00000030707/ENSMUSG00000020120/ENSMUSG00000090272/ENSMUSG00000003283
GO:0071887	leukocyte apoptotic process	8/222	160/23133	0.05	5.21014	5.26027	0.00016221	0.00131464	0.000910938	ENSMUSG00000027322/ENSMUSG00000030786/ENSMUSG00000058715/ENSMUSG00000026656/ENSMUSG00000022831/ENSMUSG00000052085/ENSMUSG00000102037/ENSMUSG00000025473
GO:0006691	leukotriene metabolic process	4/222	29/23133	0.137931	14.3728	7.09314	0.000162399	0.00131464	0.000910938	ENSMUSG00000060063/ENSMUSG00000015950/ENSMUSG00000021457/ENSMUSG00000025701
GO:0033003	regulation of mast cell activation	4/222	29/23133	0.137931	14.3728	7.09314	0.000162399	0.00131464	0.000910938	ENSMUSG00000112148/ENSMUSG00000038147/ENSMUSG00000040528/ENSMUSG00000004266
GO:0002645	positive regulation of tolerance induction	3/222	12/23133	0.25	26.0507	8.54413	0.000179947	0.00144103	0.00099852	ENSMUSG00000112148/ENSMUSG00000112023/ENSMUSG00000020227
GO:0019370	leukotriene biosynthetic process	3/222	12/23133	0.25	26.0507	8.54413	0.000179947	0.00144103	0.00099852	ENSMUSG00000060063/ENSMUSG00000021457/ENSMUSG00000025701
GO:0034135	regulation of toll-like receptor 2 signaling pathway	3/222	12/23133	0.25	26.0507	8.54413	0.000179947	0.00144103	0.00099852	ENSMUSG00000022126/ENSMUSG00000023992/ENSMUSG00000044827
GO:0034154	toll-like receptor 7 signaling pathway	3/222	12/23133	0.25	26.0507	8.54413	0.000179947	0.00144103	0.00099852	ENSMUSG00000044583/ENSMUSG00000020399/ENSMUSG00000025017
GO:0046633	alpha-beta T cell proliferation	5/222	55/23133	0.0909091	9.47297	6.19269	0.000183184	0.00146301	0.00101375	ENSMUSG00000112148/ENSMUSG00000052142/ENSMUSG00000021457/ENSMUSG00000020143/ENSMUSG00000031103
GO:0031664	regulation of lipopolysaccharide-mediated signaling pathway	4/222	30/23133	0.133333	13.8937	6.95608	0.00018598	0.00147743	0.00102374	ENSMUSG00000022126/ENSMUSG00000038147/ENSMUSG00000021423/ENSMUSG00000021624
GO:0150146	cell junction disassembly	4/222	30/23133	0.133333	13.8937	6.95608	0.00018598	0.00147743	0.00102374	ENSMUSG00000052336/ENSMUSG00000030786/ENSMUSG00000036887/ENSMUSG00000023992
GO:0008037	cell recognition	8/222	164/23133	0.0487805	5.08306	5.16532	0.000192134	0.00152226	0.0010548	ENSMUSG00000023992/ENSMUSG00000059498/ENSMUSG00000015947/ENSMUSG00000020399/ENSMUSG00000052085/ENSMUSG00000001128/ENSMUSG00000020143/ENSMUSG00000036103
GO:0002474	antigen processing and presentation of peptide antigen via MHC class I	5/222	56/23133	0.0892857	9.30381	6.12411	0.000199586	0.0015771	0.0010928	ENSMUSG00000058715/ENSMUSG00000059498/ENSMUSG00000015947/ENSMUSG00000046805/ENSMUSG00000079685
GO:0003018	vascular process in circulatory system	10/222	257/23133	0.0389105	4.05458	4.84718	0.000200349	0.00157894	0.00109408	ENSMUSG00000030653/ENSMUSG00000110195/ENSMUSG00000029925/ENSMUSG00000002603/ENSMUSG00000052821/ENSMUSG00000029299/ENSMUSG00000047250/ENSMUSG00000020681/ENSMUSG00000025701/ENSMUSG00000028369
GO:2000106	regulation of leukocyte apoptotic process	7/222	125/23133	0.056	5.83535	5.33586	0.000208598	0.00163961	0.00113612	ENSMUSG00000027322/ENSMUSG00000058715/ENSMUSG00000026656/ENSMUSG00000022831/ENSMUSG00000052085/ENSMUSG00000102037/ENSMUSG00000025473
GO:0043032	positive regulation of macrophage activation	4/222	31/23133	0.129032	13.4455	6.82543	0.000211935	0.00166146	0.00115126	ENSMUSG00000023992/ENSMUSG00000020399/ENSMUSG00000030560/ENSMUSG00000079685
GO:0046638	positive regulation of alpha-beta T cell differentiation	5/222	57/23133	0.0877193	9.14059	6.05723	0.000217083	0.00169735	0.00117613	ENSMUSG00000112148/ENSMUSG00000022488/ENSMUSG00000112023/ENSMUSG00000031101/ENSMUSG00000021457
GO:0046634	regulation of alpha-beta T cell activation	7/222	127/23133	0.0551181	5.74346	5.27639	0.000230011	0.00179373	0.00124291	ENSMUSG00000112148/ENSMUSG00000022488/ENSMUSG00000052142/ENSMUSG00000112023/ENSMUSG00000002603/ENSMUSG00000031101/ENSMUSG00000021457
GO:0043301	negative regulation of leukocyte degranulation	3/222	13/23133	0.230769	24.0468	8.1818	0.000232277	0.00180196	0.00124862	ENSMUSG00000038147/ENSMUSG00000002111/ENSMUSG00000022488
GO:0106014	regulation of inflammatory response to wounding	3/222	13/23133	0.230769	24.0468	8.1818	0.000232277	0.00180196	0.00124862	ENSMUSG00000004266/ENSMUSG00000025701/ENSMUSG00000034708
GO:0141084	inflammasome-mediated signaling pathway	5/222	58/23133	0.0862069	8.98299	5.99197	0.000235724	0.00182396	0.00126386	ENSMUSG00000031264/ENSMUSG00000023992/ENSMUSG00000073490/ENSMUSG00000039997/ENSMUSG00000090272
GO:0002220	innate immune response activating cell surface receptor signaling pathway	6/222	91/23133	0.0659341	6.87051	5.52328	0.000246763	0.00190442	0.00131961	ENSMUSG00000022126/ENSMUSG00000023992/ENSMUSG00000030579/ENSMUSG00000021457/ENSMUSG00000025017/ENSMUSG00000044827
GO:0045582	positive regulation of T cell differentiation	7/222	129/23133	0.0542636	5.65441	5.21818	0.000253162	0.00194876	0.00135034	ENSMUSG00000112148/ENSMUSG00000022488/ENSMUSG00000112023/ENSMUSG00000002603/ENSMUSG00000031101/ENSMUSG00000021457/ENSMUSG00000025473
GO:0019229	regulation of vasoconstriction	6/222	92/23133	0.0652174	6.79583	5.48302	0.000261891	0.00201076	0.0013933	ENSMUSG00000029925/ENSMUSG00000052821/ENSMUSG00000047250/ENSMUSG00000020681/ENSMUSG00000025701/ENSMUSG00000028369
GO:0002713	negative regulation of B cell mediated immunity	3/222	14/23133	0.214286	22.3292	7.85804	0.000293536	0.00224216	0.00155364	ENSMUSG00000026656/ENSMUSG00000004266/ENSMUSG00000028369
GO:0002890	negative regulation of immunoglobulin mediated immune response	3/222	14/23133	0.214286	22.3292	7.85804	0.000293536	0.00224216	0.00155364	ENSMUSG00000026656/ENSMUSG00000004266/ENSMUSG00000028369
GO:0010758	regulation of macrophage chemotaxis	4/222	34/23133	0.117647	12.2591	6.46709	0.000305412	0.0023092	0.00160009	ENSMUSG00000024621/ENSMUSG00000049130/ENSMUSG00000040552/ENSMUSG00000042190
GO:0032673	regulation of interleukin-4 production	4/222	34/23133	0.117647	12.2591	6.46709	0.000305412	0.0023092	0.00160009	ENSMUSG00000058715/ENSMUSG00000031101/ENSMUSG00000021457/ENSMUSG00000020399
GO:0090023	positive regulation of neutrophil chemotaxis	4/222	34/23133	0.117647	12.2591	6.46709	0.000305412	0.0023092	0.00160009	ENSMUSG00000022488/ENSMUSG00000049130/ENSMUSG00000040552/ENSMUSG00000033220
GO:0150077	regulation of neuroinflammatory response	4/222	34/23133	0.117647	12.2591	6.46709	0.000305412	0.0023092	0.00160009	ENSMUSG00000024621/ENSMUSG00000023992/ENSMUSG00000030560/ENSMUSG00000034708
GO:1990868	response to chemokine	6/222	95/23133	0.0631579	6.58122	5.36574	0.000311689	0.00234475	0.00162473	ENSMUSG00000052336/ENSMUSG00000023992/ENSMUSG00000019122/ENSMUSG00000052085/ENSMUSG00000018927/ENSMUSG00000024529
GO:1990869	cellular response to chemokine	6/222	95/23133	0.0631579	6.58122	5.36574	0.000311689	0.00234475	0.00162473	ENSMUSG00000052336/ENSMUSG00000023992/ENSMUSG00000019122/ENSMUSG00000052085/ENSMUSG00000018927/ENSMUSG00000024529
GO:0070374	positive regulation of ERK1 and ERK2 cascade	9/222	223/23133	0.0403587	4.20549	4.73473	0.000318568	0.00239046	0.0016564	ENSMUSG00000029816/ENSMUSG00000026390/ENSMUSG00000024621/ENSMUSG00000023992/ENSMUSG00000049130/ENSMUSG00000002603/ENSMUSG00000048779/ENSMUSG00000020399/ENSMUSG00000057967
GO:0051607	defense response to virus	11/222	325/23133	0.0338462	3.52686	4.51586	0.000323434	0.00242088	0.00167748	ENSMUSG00000022126/ENSMUSG00000040522/ENSMUSG00000030798/ENSMUSG00000044583/ENSMUSG00000073490/ENSMUSG00000066800/ENSMUSG00000037860/ENSMUSG00000039997/ENSMUSG00000029771/ENSMUSG00000090272/ENSMUSG00000033450
GO:0048708	astrocyte differentiation	6/222	96/23133	0.0625	6.51267	5.32777	0.000329841	0.00246265	0.00170642	ENSMUSG00000036887/ENSMUSG00000024621/ENSMUSG00000023992/ENSMUSG00000049130/ENSMUSG00000034708/ENSMUSG00000031425
GO:0070372	regulation of ERK1 and ERK2 cascade	11/222	327/23133	0.0336391	3.50529	4.49126	0.000340669	0.00253713	0.00175803	ENSMUSG00000029816/ENSMUSG00000026390/ENSMUSG00000024621/ENSMUSG00000023992/ENSMUSG00000049130/ENSMUSG00000002603/ENSMUSG00000021457/ENSMUSG00000048779/ENSMUSG00000020399/ENSMUSG00000057967/ENSMUSG00000004266
GO:0043302	positive regulation of leukocyte degranulation	4/222	35/23133	0.114286	11.9089	6.35752	0.000342243	0.0025425	0.00176175	ENSMUSG00000030786/ENSMUSG00000058715/ENSMUSG00000000290/ENSMUSG00000021457
GO:0006956	complement activation	5/222	63/23133	0.0793651	8.27006	5.68781	0.000347828	0.00257756	0.00178605	ENSMUSG00000036887/ENSMUSG00000023992/ENSMUSG00000076617/ENSMUSG00000001128/ENSMUSG00000028369
GO:0002679	respiratory burst involved in defense response	3/222	15/23133	0.2	20.8405	7.56633	0.000364327	0.00269312	0.00186612	ENSMUSG00000023992/ENSMUSG00000015950/ENSMUSG00000034708
GO:0030522	intracellular receptor signaling pathway	12/222	386/23133	0.0310881	3.23946	4.36753	0.00037696	0.00277961	0.00192605	ENSMUSG00000031264/ENSMUSG00000040522/ENSMUSG00000023992/ENSMUSG00000033777/ENSMUSG00000044583/ENSMUSG00000073490/ENSMUSG00000039997/ENSMUSG00000020399/ENSMUSG00000025017/ENSMUSG00000090272/ENSMUSG00000039316/ENSMUSG00000036103
GO:0002719	negative regulation of cytokine production involved in immune response	4/222	36/23133	0.111111	11.5781	6.25232	0.000382146	0.0028109	0.00194773	ENSMUSG00000112148/ENSMUSG00000112023/ENSMUSG00000002603/ENSMUSG00000020227
GO:0042269	regulation of natural killer cell mediated cytotoxicity	5/222	65/23133	0.0769231	8.01559	5.57541	0.000402455	0.00295299	0.00204619	ENSMUSG00000034116/ENSMUSG00000002603/ENSMUSG00000048583/ENSMUSG00000020399/ENSMUSG00000079685
GO:0007200	phospholipase C-activating G protein-coupled receptor signaling pathway	7/222	140/23133	0.05	5.21014	4.91839	0.000416307	0.00304712	0.00211141	ENSMUSG00000052336/ENSMUSG00000049130/ENSMUSG00000020573/ENSMUSG00000040552/ENSMUSG00000042190/ENSMUSG00000020120/ENSMUSG00000034792
GO:0071624	positive regulation of granulocyte chemotaxis	4/222	37/23133	0.108108	11.2652	6.15119	0.000425266	0.00309748	0.00214631	ENSMUSG00000022488/ENSMUSG00000049130/ENSMUSG00000040552/ENSMUSG00000033220
GO:2000406	positive regulation of T cell migration	4/222	37/23133	0.108108	11.2652	6.15119	0.000425266	0.00309748	0.00214631	ENSMUSG00000024397/ENSMUSG00000030707/ENSMUSG00000052085/ENSMUSG00000025473
GO:0046007	negative regulation of activated T cell proliferation	3/222	16/23133	0.1875	19.538	7.30161	0.000445235	0.00323501	0.00224161	ENSMUSG00000112148/ENSMUSG00000112023/ENSMUSG00000090958
GO:0042060	wound healing	12/222	394/23133	0.0304569	3.17369	4.28371	0.000452642	0.00328083	0.00227335	ENSMUSG00000112148/ENSMUSG00000058715/ENSMUSG00000026177/ENSMUSG00000024965/ENSMUSG00000021457/ENSMUSG00000042644/ENSMUSG00000020120/ENSMUSG00000000530/ENSMUSG00000021822/ENSMUSG00000004266/ENSMUSG00000025701/ENSMUSG00000028369
GO:0035458	cellular response to interferon-beta	5/222	67/23133	0.0746269	7.77632	5.46772	0.000463318	0.00334195	0.0023157	ENSMUSG00000022126/ENSMUSG00000073490/ENSMUSG00000037860/ENSMUSG00000039997/ENSMUSG00000090272
GO:1903307	positive regulation of regulated secretory pathway	5/222	67/23133	0.0746269	7.77632	5.46772	0.000463318	0.00334195	0.0023157	ENSMUSG00000030786/ENSMUSG00000058715/ENSMUSG00000000290/ENSMUSG00000021457/ENSMUSG00000024261
GO:0036037	CD8-positive, alpha-beta T cell activation	4/222	38/23133	0.105263	10.9687	6.05386	0.000471748	0.00338635	0.00234647	ENSMUSG00000112148/ENSMUSG00000051506/ENSMUSG00000022488/ENSMUSG00000112023
GO:0045920	negative regulation of exocytosis	4/222	38/23133	0.105263	10.9687	6.05386	0.000471748	0.00338635	0.00234647	ENSMUSG00000038147/ENSMUSG00000002111/ENSMUSG00000022488/ENSMUSG00000024261
GO:0002377	immunoglobulin production	7/222	144/23133	0.0486111	5.06541	4.81711	0.000493102	0.00352642	0.00244353	ENSMUSG00000112148/ENSMUSG00000031264/ENSMUSG00000030798/ENSMUSG00000026656/ENSMUSG00000002603/ENSMUSG00000031101/ENSMUSG00000076617
GO:0051924	regulation of calcium ion transport	10/222	288/23133	0.0347222	3.61815	4.40105	0.000493627	0.00352642	0.00244353	ENSMUSG00000038147/ENSMUSG00000020573/ENSMUSG00000002603/ENSMUSG00000048779/ENSMUSG00000030707/ENSMUSG00000018507/ENSMUSG00000004266/ENSMUSG00000020681/ENSMUSG00000001741/ENSMUSG00000031425
GO:0061082	myeloid leukocyte cytokine production	5/222	68/23133	0.0735294	7.66196	5.41553	0.000496228	0.00352807	0.00244468	ENSMUSG00000058715/ENSMUSG00000044583/ENSMUSG00000002603/ENSMUSG00000021457/ENSMUSG00000020227
GO:1903409	reactive oxygen species biosynthetic process	5/222	68/23133	0.0735294	7.66196	5.41553	0.000496228	0.00352807	0.00244468	ENSMUSG00000015950/ENSMUSG00000015340/ENSMUSG00000064267/ENSMUSG00000026480/ENSMUSG00000025701
GO:0046632	alpha-beta T cell differentiation	7/222	145/23133	0.0482759	5.03048	4.79237	0.000513962	0.00364546	0.00252601	ENSMUSG00000004707/ENSMUSG00000112148/ENSMUSG00000022488/ENSMUSG00000112023/ENSMUSG00000002603/ENSMUSG00000031101/ENSMUSG00000021457
GO:0006958	complement activation, classical pathway	4/222	39/23133	0.102564	10.6875	5.9601	0.000521737	0.00369182	0.00255814	ENSMUSG00000036887/ENSMUSG00000023992/ENSMUSG00000076617/ENSMUSG00000028369
GO:0019722	calcium-mediated signaling	9/222	239/23133	0.0376569	3.92395	4.47269	0.000526961	0.00371994	0.00257763	ENSMUSG00000052336/ENSMUSG00000023992/ENSMUSG00000040552/ENSMUSG00000021457/ENSMUSG00000042644/ENSMUSG00000040751/ENSMUSG00000042190/ENSMUSG00000030830/ENSMUSG00000034792
GO:0050852	T cell receptor signaling pathway	7/222	146/23133	0.0479452	4.99602	4.76787	0.000535518	0.003754	0.00260122	ENSMUSG00000112148/ENSMUSG00000031264/ENSMUSG00000112023/ENSMUSG00000002699/ENSMUSG00000004266/ENSMUSG00000022148/ENSMUSG00000039316
GO:0002468	dendritic cell antigen processing and presentation	3/222	17/23133	0.176471	18.3887	7.05987	0.000536826	0.003754	0.00260122	ENSMUSG00000026177/ENSMUSG00000018774/ENSMUSG00000046805
GO:0060100	positive regulation of phagocytosis, engulfment	3/222	17/23133	0.176471	18.3887	7.05987	0.000536826	0.003754	0.00260122	ENSMUSG00000023992/ENSMUSG00000022488/ENSMUSG00000015947
GO:1905155	positive regulation of membrane invagination	3/222	17/23133	0.176471	18.3887	7.05987	0.000536826	0.003754	0.00260122	ENSMUSG00000023992/ENSMUSG00000022488/ENSMUSG00000015947
GO:0031343	positive regulation of cell killing	6/222	106/23133	0.0566038	5.89827	4.97551	0.000560696	0.00391174	0.00271053	ENSMUSG00000034116/ENSMUSG00000030786/ENSMUSG00000002111/ENSMUSG00000030579/ENSMUSG00000021457/ENSMUSG00000079685
GO:0000768	syncytium formation by plasma membrane fusion	5/222	70/23133	0.0714286	7.44305	5.31427	0.000567289	0.00392101	0.00271695	ENSMUSG00000040747/ENSMUSG00000023992/ENSMUSG00000030579/ENSMUSG00000025473/ENSMUSG00000020143
GO:0002715	regulation of natural killer cell mediated immunity	5/222	70/23133	0.0714286	7.44305	5.31427	0.000567289	0.00392101	0.00271695	ENSMUSG00000034116/ENSMUSG00000002603/ENSMUSG00000048583/ENSMUSG00000020399/ENSMUSG00000079685
GO:0140253	cell-cell fusion	5/222	70/23133	0.0714286	7.44305	5.31427	0.000567289	0.00392101	0.00271695	ENSMUSG00000040747/ENSMUSG00000023992/ENSMUSG00000030579/ENSMUSG00000025473/ENSMUSG00000020143
GO:2000401	regulation of lymphocyte migration	5/222	70/23133	0.0714286	7.44305	5.31427	0.000567289	0.00392101	0.00271695	ENSMUSG00000022548/ENSMUSG00000024397/ENSMUSG00000030707/ENSMUSG00000052085/ENSMUSG00000025473
GO:0045672	positive regulation of osteoclast differentiation	4/222	40/23133	0.1	10.4203	5.86968	0.000575381	0.00396773	0.00274932	ENSMUSG00000024621/ENSMUSG00000023992/ENSMUSG00000030579/ENSMUSG00000019122
GO:0006816	calcium ion transport	13/222	468/23133	0.0277778	2.89452	4.07573	0.000628336	0.00432289	0.00299542	ENSMUSG00000100254/ENSMUSG00000038147/ENSMUSG00000020573/ENSMUSG00000002603/ENSMUSG00000042644/ENSMUSG00000048779/ENSMUSG00000052821/ENSMUSG00000030707/ENSMUSG00000018507/ENSMUSG00000004266/ENSMUSG00000020681/ENSMUSG00000001741/ENSMUSG00000031425
GO:0001771	immunological synapse formation	3/222	18/23133	0.166667	17.3671	6.8379	0.000639645	0.00435046	0.00301452	ENSMUSG00000020399/ENSMUSG00000052085/ENSMUSG00000020143
GO:0001820	serotonin secretion	3/222	18/23133	0.166667	17.3671	6.8379	0.000639645	0.00435046	0.00301452	ENSMUSG00000058715/ENSMUSG00000059498/ENSMUSG00000021457
GO:0002921	negative regulation of humoral immune response	3/222	18/23133	0.166667	17.3671	6.8379	0.000639645	0.00435046	0.00301452	ENSMUSG00000026656/ENSMUSG00000004266/ENSMUSG00000028369
GO:0007252	I-kappaB phosphorylation	3/222	18/23133	0.166667	17.3671	6.8379	0.000639645	0.00435046	0.00301452	ENSMUSG00000052336/ENSMUSG00000044583/ENSMUSG00000040026
GO:0060263	regulation of respiratory burst	3/222	18/23133	0.166667	17.3671	6.8379	0.000639645	0.00435046	0.00301452	ENSMUSG00000015950/ENSMUSG00000033220/ENSMUSG00000034708
GO:0006949	syncytium formation	5/222	72/23133	0.0694444	7.2363	5.21693	0.000645727	0.00438182	0.00303625	ENSMUSG00000040747/ENSMUSG00000023992/ENSMUSG00000030579/ENSMUSG00000025473/ENSMUSG00000020143
GO:0070371	ERK1 and ERK2 cascade	11/222	356/23133	0.0308989	3.21975	4.15471	0.000691384	0.00466838	0.00323482	ENSMUSG00000029816/ENSMUSG00000026390/ENSMUSG00000024621/ENSMUSG00000023992/ENSMUSG00000049130/ENSMUSG00000002603/ENSMUSG00000021457/ENSMUSG00000048779/ENSMUSG00000020399/ENSMUSG00000057967/ENSMUSG00000004266
GO:0032633	interleukin-4 production	4/222	42/23133	0.0952381	9.92407	5.69806	0.000694224	0.00466838	0.00323482	ENSMUSG00000058715/ENSMUSG00000031101/ENSMUSG00000021457/ENSMUSG00000020399
GO:0042832	defense response to protozoan	4/222	42/23133	0.0952381	9.92407	5.69806	0.000694224	0.00466838	0.00323482	ENSMUSG00000026177/ENSMUSG00000030798/ENSMUSG00000041515/ENSMUSG00000047810
GO:0090022	regulation of neutrophil chemotaxis	4/222	42/23133	0.0952381	9.92407	5.69806	0.000694224	0.00466838	0.00323482	ENSMUSG00000022488/ENSMUSG00000049130/ENSMUSG00000040552/ENSMUSG00000033220
GO:0042063	gliogenesis	12/222	416/23133	0.0288462	3.00585	4.06378	0.000729764	0.00489632	0.00339276	ENSMUSG00000052336/ENSMUSG00000030786/ENSMUSG00000036887/ENSMUSG00000024621/ENSMUSG00000023992/ENSMUSG00000049130/ENSMUSG00000002603/ENSMUSG00000052821/ENSMUSG00000052384/ENSMUSG00000023000/ENSMUSG00000034708/ENSMUSG00000031425
GO:0006690	icosanoid metabolic process	7/222	154/23133	0.0454545	4.73649	4.57951	0.000735105	0.00492107	0.00340991	ENSMUSG00000060063/ENSMUSG00000029925/ENSMUSG00000015950/ENSMUSG00000021457/ENSMUSG00000047250/ENSMUSG00000029919/ENSMUSG00000025701
GO:0032695	negative regulation of interleukin-12 production	3/222	19/23133	0.157895	16.4531	6.63307	0.000754221	0.00502645	0.00348293	ENSMUSG00000040522/ENSMUSG00000020227/ENSMUSG00000042190
GO:1903978	regulation of microglial cell activation	3/222	19/23133	0.157895	16.4531	6.63307	0.000754221	0.00502645	0.00348293	ENSMUSG00000023992/ENSMUSG00000030560/ENSMUSG00000034708
GO:2000116	regulation of cysteine-type endopeptidase activity	8/222	202/23133	0.039604	4.12684	4.3937	0.000771973	0.00513328	0.00355695	ENSMUSG00000073490/ENSMUSG00000021457/ENSMUSG00000017737/ENSMUSG00000024066/ENSMUSG00000037860/ENSMUSG00000039997/ENSMUSG00000090272/ENSMUSG00000078945
GO:0048525	negative regulation of viral process	6/222	114/23133	0.0526316	5.48435	4.72465	0.000822774	0.00541878	0.00375478	ENSMUSG00000050370/ENSMUSG00000073490/ENSMUSG00000066800/ENSMUSG00000039997/ENSMUSG00000090272/ENSMUSG00000039853
GO:0010952	positive regulation of peptidase activity	7/222	157/23133	0.044586	4.64598	4.5122	0.00082356	0.00541878	0.00375478	ENSMUSG00000073490/ENSMUSG00000021457/ENSMUSG00000024066/ENSMUSG00000037860/ENSMUSG00000039997/ENSMUSG00000090272/ENSMUSG00000034708
GO:0035456	response to interferon-beta	5/222	76/23133	0.0657895	6.85544	5.03299	0.000826641	0.00541878	0.00375478	ENSMUSG00000022126/ENSMUSG00000073490/ENSMUSG00000037860/ENSMUSG00000039997/ENSMUSG00000090272
GO:0010001	glial cell differentiation	10/222	308/23133	0.0324675	3.3832	4.14469	0.000827472	0.00541878	0.00375478	ENSMUSG00000030786/ENSMUSG00000036887/ENSMUSG00000024621/ENSMUSG00000023992/ENSMUSG00000049130/ENSMUSG00000002603/ENSMUSG00000052384/ENSMUSG00000023000/ENSMUSG00000034708/ENSMUSG00000031425
GO:0032480	negative regulation of type I interferon production	4/222	44/23133	0.0909091	9.47297	5.53759	0.000829461	0.00541878	0.00375478	ENSMUSG00000027322/ENSMUSG00000022126/ENSMUSG00000030579/ENSMUSG00000020399
GO:0032733	positive regulation of interleukin-10 production	4/222	44/23133	0.0909091	9.47297	5.53759	0.000829461	0.00541878	0.00375478	ENSMUSG00000058715/ENSMUSG00000023992/ENSMUSG00000031101/ENSMUSG00000021457
GO:0046006	regulation of activated T cell proliferation	4/222	44/23133	0.0909091	9.47297	5.53759	0.000829461	0.00541878	0.00375478	ENSMUSG00000112148/ENSMUSG00000112023/ENSMUSG00000048583/ENSMUSG00000090958
GO:2000403	positive regulation of lymphocyte migration	4/222	44/23133	0.0909091	9.47297	5.53759	0.000829461	0.00541878	0.00375478	ENSMUSG00000024397/ENSMUSG00000030707/ENSMUSG00000052085/ENSMUSG00000025473
GO:0042310	vasoconstriction	6/222	115/23133	0.0521739	5.43666	4.69497	0.000861224	0.00561398	0.00389004	ENSMUSG00000029925/ENSMUSG00000052821/ENSMUSG00000047250/ENSMUSG00000020681/ENSMUSG00000025701/ENSMUSG00000028369
GO:0002577	regulation of antigen processing and presentation	3/222	20/23133	0.15	15.6304	6.44324	0.000881063	0.00573076	0.00397096	ENSMUSG00000026177/ENSMUSG00000023992/ENSMUSG00000018774
GO:0032956	regulation of actin cytoskeleton organization	11/222	367/23133	0.0299728	3.12324	4.03599	0.000886152	0.0057513	0.00398519	ENSMUSG00000024300/ENSMUSG00000024621/ENSMUSG00000022488/ENSMUSG00000002603/ENSMUSG00000022831/ENSMUSG00000030707/ENSMUSG00000024451/ENSMUSG00000020120/ENSMUSG00000021886/ENSMUSG00000003283/ENSMUSG00000081683
GO:0050830	defense response to Gram-positive bacterium	7/222	160/23133	0.04375	4.55887	4.44656	0.000920218	0.00595941	0.0041294	ENSMUSG00000069516/ENSMUSG00000024300/ENSMUSG00000049130/ENSMUSG00000015950/ENSMUSG00000020399/ENSMUSG00000046805/ENSMUSG00000003283
GO:0015850	organic hydroxy compound transport	10/222	314/23133	0.0318471	3.31856	4.07188	0.000957811	0.00618011	0.00428232	ENSMUSG00000020865/ENSMUSG00000058715/ENSMUSG00000023992/ENSMUSG00000025044/ENSMUSG00000059498/ENSMUSG00000021457/ENSMUSG00000025161/ENSMUSG00000024261/ENSMUSG00000029304/ENSMUSG00000047250
GO:0043122	regulation of canonical NF-kappaB signal transduction	9/222	260/23133	0.0346154	3.60702	4.16131	0.000958446	0.00618011	0.00428232	ENSMUSG00000052336/ENSMUSG00000112148/ENSMUSG00000040522/ENSMUSG00000023992/ENSMUSG00000044583/ENSMUSG00000112023/ENSMUSG00000002603/ENSMUSG00000030144/ENSMUSG00000020227
GO:0051090	regulation of DNA-binding transcription factor activity	11/222	371/23133	0.0296496	3.08957	3.99392	0.00096739	0.00622431	0.00431295	ENSMUSG00000022126/ENSMUSG00000038147/ENSMUSG00000002111/ENSMUSG00000026656/ENSMUSG00000021457/ENSMUSG00000037860/ENSMUSG00000020399/ENSMUSG00000020227/ENSMUSG00000042190/ENSMUSG00000039853/ENSMUSG00000003283
GO:0001562	response to protozoan	4/222	46/23133	0.0869565	9.0611	5.38705	0.000982283	0.00627945	0.00435116	ENSMUSG00000026177/ENSMUSG00000030798/ENSMUSG00000041515/ENSMUSG00000047810
GO:0001782	B cell homeostasis	4/222	46/23133	0.0869565	9.0611	5.38705	0.000982283	0.00627945	0.00435116	ENSMUSG00000058818/ENSMUSG00000022488/ENSMUSG00000031101/ENSMUSG00000102037
GO:0002335	mature B cell differentiation	4/222	46/23133	0.0869565	9.0611	5.38705	0.000982283	0.00627945	0.00435116	ENSMUSG00000112148/ENSMUSG00000002111/ENSMUSG00000041515/ENSMUSG00000032436
GO:2000117	negative regulation of cysteine-type endopeptidase activity	5/222	79/23133	0.0632911	6.59511	4.90354	0.000985292	0.00628519	0.00435514	ENSMUSG00000073490/ENSMUSG00000017737/ENSMUSG00000039997/ENSMUSG00000090272/ENSMUSG00000078945
GO:0030852	regulation of granulocyte differentiation	3/222	21/23133	0.142857	14.8861	6.2666	0.00102066	0.00648306	0.00449225	ENSMUSG00000093938/ENSMUSG00000022831/ENSMUSG00000026288
GO:0097202	activation of cysteine-type endopeptidase activity	3/222	21/23133	0.142857	14.8861	6.2666	0.00102066	0.00648306	0.00449225	ENSMUSG00000073490/ENSMUSG00000039997/ENSMUSG00000090272
GO:0006195	purine nucleotide catabolic process	7/222	163/23133	0.0429448	4.47496	4.38253	0.0010256	0.00650058	0.00450439	ENSMUSG00000030653/ENSMUSG00000110195/ENSMUSG00000025877/ENSMUSG00000015950/ENSMUSG00000024066/ENSMUSG00000026480/ENSMUSG00000036067
GO:0033028	myeloid cell apoptotic process	4/222	47/23133	0.0851064	8.86832	5.31517	0.00106566	0.00674014	0.00467038	ENSMUSG00000030786/ENSMUSG00000058715/ENSMUSG00000026656/ENSMUSG00000029915
GO:0045123	cellular extravasation	5/222	81/23133	0.0617284	6.43227	4.82092	0.00110294	0.00696112	0.00482351	ENSMUSG00000052336/ENSMUSG00000030786/ENSMUSG00000000290/ENSMUSG00000030830/ENSMUSG00000025473
GO:0032814	regulation of natural killer cell activation	4/222	48/23133	0.0833333	8.68356	5.24541	0.00115389	0.00726728	0.00503565	ENSMUSG00000112148/ENSMUSG00000030579/ENSMUSG00000020399/ENSMUSG00000079685
GO:0019886	antigen processing and presentation of exogenous peptide antigen via MHC class II	3/222	22/23133	0.136364	14.2095	6.10166	0.0011735	0.00734421	0.00508895	ENSMUSG00000058715/ENSMUSG00000038642/ENSMUSG00000026656
GO:0043117	positive regulation of vascular permeability	3/222	22/23133	0.136364	14.2095	6.10166	0.0011735	0.00734421	0.00508895	ENSMUSG00000030653/ENSMUSG00000110195/ENSMUSG00000002603
GO:2001185	regulation of CD8-positive, alpha-beta T cell activation	3/222	22/23133	0.136364	14.2095	6.10166	0.0011735	0.00734421	0.00508895	ENSMUSG00000112148/ENSMUSG00000022488/ENSMUSG00000112023
GO:0010543	regulation of platelet activation	4/222	49/23133	0.0816327	8.50634	5.17764	0.0012471	0.00775598	0.00537428	ENSMUSG00000058715/ENSMUSG00000021457/ENSMUSG00000020120/ENSMUSG00000028369
GO:0030890	positive regulation of B cell proliferation	4/222	49/23133	0.0816327	8.50634	5.17764	0.0012471	0.00775598	0.00537428	ENSMUSG00000031264/ENSMUSG00000022488/ENSMUSG00000031101/ENSMUSG00000076617
GO:1904645	response to amyloid-beta	4/222	49/23133	0.0816327	8.50634	5.17764	0.0012471	0.00775598	0.00537428	ENSMUSG00000023992/ENSMUSG00000026656/ENSMUSG00000021457/ENSMUSG00000017737
GO:2000107	negative regulation of leukocyte apoptotic process	5/222	84/23133	0.0595238	6.20254	4.70208	0.00129851	0.00805885	0.00558414	ENSMUSG00000058715/ENSMUSG00000026656/ENSMUSG00000022831/ENSMUSG00000052085/ENSMUSG00000102037
GO:0010959	regulation of metal ion transport	12/222	446/23133	0.0269058	2.80366	3.78612	0.00132525	0.00820775	0.00568732	ENSMUSG00000038147/ENSMUSG00000023992/ENSMUSG00000020573/ENSMUSG00000002603/ENSMUSG00000048779/ENSMUSG00000030707/ENSMUSG00000018507/ENSMUSG00000009687/ENSMUSG00000004266/ENSMUSG00000020681/ENSMUSG00000001741/ENSMUSG00000031425
GO:0043374	CD8-positive, alpha-beta T cell differentiation	3/222	23/23133	0.130435	13.5917	5.94714	0.00134002	0.00828124	0.00573824	ENSMUSG00000112148/ENSMUSG00000022488/ENSMUSG00000112023
GO:0002369	T cell cytokine production	4/222	50/23133	0.08	8.33622	5.11178	0.00134546	0.00828124	0.00573824	ENSMUSG00000112148/ENSMUSG00000026177/ENSMUSG00000112023/ENSMUSG00000031101
GO:0045646	regulation of erythrocyte differentiation	4/222	50/23133	0.08	8.33622	5.11178	0.00134546	0.00828124	0.00573824	ENSMUSG00000002111/ENSMUSG00000022488/ENSMUSG00000026288/ENSMUSG00000032698
GO:0030851	granulocyte differentiation	4/222	51/23133	0.0784314	8.17276	5.04773	0.00144911	0.00890079	0.00616754	ENSMUSG00000002111/ENSMUSG00000093938/ENSMUSG00000022831/ENSMUSG00000026288
GO:0033033	negative regulation of myeloid cell apoptotic process	3/222	24/23133	0.125	13.0253	5.80194	0.00152067	0.00930202	0.00644556	ENSMUSG00000058715/ENSMUSG00000026656/ENSMUSG00000029915
GO:0043011	myeloid dendritic cell differentiation	3/222	24/23133	0.125	13.0253	5.80194	0.00152067	0.00930202	0.00644556	ENSMUSG00000058818/ENSMUSG00000002111/ENSMUSG00000002603
GO:0002347	response to tumor cell	4/222	52/23133	0.0769231	8.01559	4.9854	0.00155819	0.00949587	0.00657988	ENSMUSG00000002111/ENSMUSG00000002603/ENSMUSG00000020399/ENSMUSG00000079685
GO:2001056	positive regulation of cysteine-type endopeptidase activity	6/222	129/23133	0.0465116	4.84664	4.31256	0.00155874	0.00949587	0.00657988	ENSMUSG00000073490/ENSMUSG00000021457/ENSMUSG00000024066/ENSMUSG00000037860/ENSMUSG00000039997/ENSMUSG00000090272
GO:0045862	positive regulation of proteolysis	10/222	336/23133	0.0297619	3.10127	3.81921	0.00158772	0.00965267	0.00668853	ENSMUSG00000023992/ENSMUSG00000073490/ENSMUSG00000021457/ENSMUSG00000024066/ENSMUSG00000037860/ENSMUSG00000039997/ENSMUSG00000090272/ENSMUSG00000030560/ENSMUSG00000025473/ENSMUSG00000034708
GO:1904062	regulation of monoatomic cation transmembrane transport	10/222	339/23133	0.0294985	3.07383	3.78637	0.00169501	0.010284	0.00712597	ENSMUSG00000023992/ENSMUSG00000020573/ENSMUSG00000038642/ENSMUSG00000002603/ENSMUSG00000017737/ENSMUSG00000048779/ENSMUSG00000030707/ENSMUSG00000009687/ENSMUSG00000004266/ENSMUSG00000031425
GO:0050765	negative regulation of phagocytosis	3/222	25/23133	0.12	12.5043	5.66514	0.00171588	0.0103684	0.00718447	ENSMUSG00000026656/ENSMUSG00000002603/ENSMUSG00000030474
GO:0071800	podosome assembly	3/222	25/23133	0.12	12.5043	5.66514	0.00171588	0.0103684	0.00718447	ENSMUSG00000098112/ENSMUSG00000021998/ENSMUSG00000003283
GO:0002720	positive regulation of cytokine production involved in immune response	5/222	90/23133	0.0555556	5.78904	4.48086	0.0017649	0.010643	0.00737473	ENSMUSG00000058715/ENSMUSG00000044583/ENSMUSG00000031101/ENSMUSG00000021457/ENSMUSG00000029771
GO:0098586	cellular response to virus	4/222	54/23133	0.0740741	7.71872	4.86559	0.00179326	0.0107922	0.00747813	ENSMUSG00000051506/ENSMUSG00000044583/ENSMUSG00000002603/ENSMUSG00000029771
GO:0009166	nucleotide catabolic process	7/222	181/23133	0.038674	4.02994	4.02832	0.00187256	0.0112467	0.00779308	ENSMUSG00000030653/ENSMUSG00000110195/ENSMUSG00000025877/ENSMUSG00000015950/ENSMUSG00000024066/ENSMUSG00000026480/ENSMUSG00000036067
GO:0007565	female pregnancy	8/222	233/23133	0.0343348	3.57778	3.89284	0.00191678	0.0114754	0.00795157	ENSMUSG00000022126/ENSMUSG00000030220/ENSMUSG00000002603/ENSMUSG00000017737/ENSMUSG00000020399/ENSMUSG00000031659/ENSMUSG00000020681/ENSMUSG00000034708
GO:0033630	positive regulation of cell adhesion mediated by integrin	3/222	26/23133	0.115385	12.0234	5.53594	0.00192606	0.0114754	0.00795157	ENSMUSG00000022488/ENSMUSG00000021457/ENSMUSG00000004266
GO:0045591	positive regulation of regulatory T cell differentiation	3/222	26/23133	0.115385	12.0234	5.53594	0.00192606	0.0114754	0.00795157	ENSMUSG00000112148/ENSMUSG00000112023/ENSMUSG00000002603
GO:0072677	eosinophil migration	3/222	26/23133	0.115385	12.0234	5.53594	0.00192606	0.0114754	0.00795157	ENSMUSG00000019122/ENSMUSG00000018927/ENSMUSG00000025473
GO:0072523	purine-containing compound catabolic process	7/222	182/23133	0.0384615	4.0078	4.01	0.00193193	0.0114875	0.00795991	ENSMUSG00000030653/ENSMUSG00000110195/ENSMUSG00000025877/ENSMUSG00000015950/ENSMUSG00000024066/ENSMUSG00000026480/ENSMUSG00000036067
GO:0043029	T cell homeostasis	4/222	56/23133	0.0714286	7.44305	4.75179	0.00205185	0.012152	0.00842037	ENSMUSG00000022488/ENSMUSG00000002603/ENSMUSG00000037860/ENSMUSG00000030707
GO:0061756	leukocyte adhesion to vascular endothelial cell	4/222	56/23133	0.0714286	7.44305	4.75179	0.00205185	0.012152	0.00842037	ENSMUSG00000052336/ENSMUSG00000030786/ENSMUSG00000000290/ENSMUSG00000025701
GO:0043542	endothelial cell migration	8/222	237/23133	0.0337553	3.51739	3.83448	0.00213078	0.0125944	0.00872695	ENSMUSG00000020573/ENSMUSG00000002603/ENSMUSG00000000290/ENSMUSG00000048583/ENSMUSG00000000530/ENSMUSG00000057967/ENSMUSG00000025473/ENSMUSG00000034708
GO:0045780	positive regulation of bone resorption	3/222	27/23133	0.111111	11.5781	5.41361	0.00215159	0.0126671	0.00877732	ENSMUSG00000021457/ENSMUSG00000029304/ENSMUSG00000025473
GO:0060143	positive regulation of syncytium formation by plasma membrane fusion	3/222	27/23133	0.111111	11.5781	5.41361	0.00215159	0.0126671	0.00877732	ENSMUSG00000040747/ENSMUSG00000023992/ENSMUSG00000030579
GO:0071320	cellular response to cAMP	4/222	57/23133	0.0701754	7.31247	4.69697	0.00219032	0.0128698	0.00891772	ENSMUSG00000030653/ENSMUSG00000110195/ENSMUSG00000020573/ENSMUSG00000042644
GO:0001912	positive regulation of leukocyte mediated cytotoxicity	5/222	95/23133	0.0526316	5.48435	4.31122	0.00223878	0.0131286	0.00909707	ENSMUSG00000034116/ENSMUSG00000030786/ENSMUSG00000002111/ENSMUSG00000030579/ENSMUSG00000079685
GO:0016601	Rac protein signal transduction	4/222	58/23133	0.0689655	7.18639	4.64346	0.00233511	0.0136666	0.00946984	ENSMUSG00000020573/ENSMUSG00000024397/ENSMUSG00000020143/ENSMUSG00000032356
GO:0031579	membrane raft organization	3/222	28/23133	0.107143	11.1646	5.29757	0.00239285	0.0138914	0.00962561	ENSMUSG00000020143/ENSMUSG00000039316/ENSMUSG00000036103
GO:0045953	negative regulation of natural killer cell mediated cytotoxicity	3/222	28/23133	0.107143	11.1646	5.29757	0.00239285	0.0138914	0.00962561	ENSMUSG00000002603/ENSMUSG00000048583/ENSMUSG00000020399
GO:0050860	negative regulation of T cell receptor signaling pathway	3/222	28/23133	0.107143	11.1646	5.29757	0.00239285	0.0138914	0.00962561	ENSMUSG00000112148/ENSMUSG00000112023/ENSMUSG00000004266
GO:0098581	detection of external biotic stimulus	3/222	28/23133	0.107143	11.1646	5.29757	0.00239285	0.0138914	0.00962561	ENSMUSG00000023992/ENSMUSG00000078945/ENSMUSG00000044827
GO:0007015	actin filament organization	12/222	479/23133	0.0250522	2.61051	3.50606	0.00239683	0.0138914	0.00962561	ENSMUSG00000024300/ENSMUSG00000022488/ENSMUSG00000024397/ENSMUSG00000022831/ENSMUSG00000030047/ENSMUSG00000033220/ENSMUSG00000021998/ENSMUSG00000020437/ENSMUSG00000030707/ENSMUSG00000020120/ENSMUSG00000021886/ENSMUSG00000031636
GO:0032970	regulation of actin filament-based process	11/222	417/23133	0.0263789	2.74875	3.54725	0.00243087	0.0140613	0.00974334	ENSMUSG00000024300/ENSMUSG00000024621/ENSMUSG00000022488/ENSMUSG00000002603/ENSMUSG00000022831/ENSMUSG00000030707/ENSMUSG00000024451/ENSMUSG00000020120/ENSMUSG00000021886/ENSMUSG00000003283/ENSMUSG00000081683
GO:0030857	negative regulation of epithelial cell differentiation	4/222	59/23133	0.0677966	7.06459	4.59121	0.00248635	0.0143543	0.0099464	ENSMUSG00000024621/ENSMUSG00000017737/ENSMUSG00000024066/ENSMUSG00000000530
GO:0031214	biomineral tissue development	7/222	191/23133	0.0366492	3.81895	3.85078	0.00253432	0.014603	0.0101187	ENSMUSG00000029816/ENSMUSG00000024621/ENSMUSG00000054675/ENSMUSG00000002603/ENSMUSG00000029304/ENSMUSG00000025701/ENSMUSG00000024529
GO:0045638	negative regulation of myeloid cell differentiation	5/222	98/23133	0.0510204	5.31646	4.2151	0.00256409	0.014746	0.0102178	ENSMUSG00000112148/ENSMUSG00000024621/ENSMUSG00000112023/ENSMUSG00000026288/ENSMUSG00000032698
GO:0030282	bone mineralization	6/222	143/23133	0.041958	4.37214	3.98167	0.00262068	0.0150135	0.0104031	ENSMUSG00000029816/ENSMUSG00000024621/ENSMUSG00000054675/ENSMUSG00000029304/ENSMUSG00000025701/ENSMUSG00000024529
GO:0046683	response to organophosphorus	6/222	143/23133	0.041958	4.37214	3.98167	0.00262068	0.0150135	0.0104031	ENSMUSG00000030653/ENSMUSG00000110195/ENSMUSG00000044583/ENSMUSG00000020573/ENSMUSG00000042644/ENSMUSG00000048779
GO:0002716	negative regulation of natural killer cell mediated immunity	3/222	29/23133	0.103448	10.7796	5.18725	0.00265021	0.0151245	0.0104801	ENSMUSG00000002603/ENSMUSG00000048583/ENSMUSG00000020399
GO:0032703	negative regulation of interleukin-2 production	3/222	29/23133	0.103448	10.7796	5.18725	0.00265021	0.0151245	0.0104801	ENSMUSG00000112148/ENSMUSG00000112023/ENSMUSG00000020399
GO:0033674	positive regulation of kinase activity	9/222	304/23133	0.0296053	3.08495	3.60205	0.00278784	0.0158795	0.0110032	ENSMUSG00000024621/ENSMUSG00000026177/ENSMUSG00000023992/ENSMUSG00000020573/ENSMUSG00000002699/ENSMUSG00000021457/ENSMUSG00000024013/ENSMUSG00000057967/ENSMUSG00000044827
GO:0002639	positive regulation of immunoglobulin production	4/222	61/23133	0.0655738	6.83296	4.49027	0.00280876	0.0159377	0.0110436	ENSMUSG00000031264/ENSMUSG00000030798/ENSMUSG00000002603/ENSMUSG00000031101
GO:0032757	positive regulation of interleukin-8 production	4/222	61/23133	0.0655738	6.83296	4.49027	0.00280876	0.0159377	0.0110436	ENSMUSG00000040522/ENSMUSG00000044583/ENSMUSG00000021457/ENSMUSG00000044827
GO:0002710	negative regulation of T cell mediated immunity	3/222	30/23133	0.1	10.4203	5.08219	0.00292401	0.0165287	0.0114531	ENSMUSG00000112148/ENSMUSG00000022488/ENSMUSG00000112023
GO:1902894	negative regulation of miRNA transcription	3/222	30/23133	0.1	10.4203	5.08219	0.00292401	0.0165287	0.0114531	ENSMUSG00000112148/ENSMUSG00000112023/ENSMUSG00000002603
GO:0010950	positive regulation of endopeptidase activity	6/222	147/23133	0.0408163	4.25317	3.89489	0.00300541	0.0169496	0.0117447	ENSMUSG00000073490/ENSMUSG00000021457/ENSMUSG00000024066/ENSMUSG00000037860/ENSMUSG00000039997/ENSMUSG00000090272
GO:0045580	regulation of T cell differentiation	7/222	197/23133	0.035533	3.70263	3.74993	0.00300985	0.0169496	0.0117447	ENSMUSG00000112148/ENSMUSG00000022488/ENSMUSG00000112023/ENSMUSG00000002603/ENSMUSG00000031101/ENSMUSG00000021457/ENSMUSG00000025473
GO:0050678	regulation of epithelial cell proliferation	11/222	429/23133	0.025641	2.67186	3.44064	0.00301882	0.0169681	0.0117575	ENSMUSG00000031264/ENSMUSG00000049130/ENSMUSG00000002603/ENSMUSG00000048583/ENSMUSG00000024066/ENSMUSG00000000530/ENSMUSG00000021822/ENSMUSG00000057967/ENSMUSG00000017724/ENSMUSG00000025701/ENSMUSG00000034708
GO:0001516	prostaglandin biosynthetic process	3/222	31/23133	0.0967742	10.0841	4.98196	0.00321459	0.0178329	0.0123568	ENSMUSG00000029925/ENSMUSG00000047250/ENSMUSG00000029919
GO:0006837	serotonin transport	3/222	31/23133	0.0967742	10.0841	4.98196	0.00321459	0.0178329	0.0123568	ENSMUSG00000058715/ENSMUSG00000059498/ENSMUSG00000021457
GO:0036336	dendritic cell migration	3/222	31/23133	0.0967742	10.0841	4.98196	0.00321459	0.0178329	0.0123568	ENSMUSG00000002111/ENSMUSG00000052085/ENSMUSG00000025701
GO:0046457	prostanoid biosynthetic process	3/222	31/23133	0.0967742	10.0841	4.98196	0.00321459	0.0178329	0.0123568	ENSMUSG00000029925/ENSMUSG00000047250/ENSMUSG00000029919
GO:0071605	monocyte chemotactic protein-1 production	3/222	31/23133	0.0967742	10.0841	4.98196	0.00321459	0.0178329	0.0123568	ENSMUSG00000022548/ENSMUSG00000038147/ENSMUSG00000021457
GO:0071637	regulation of monocyte chemotactic protein-1 production	3/222	31/23133	0.0967742	10.0841	4.98196	0.00321459	0.0178329	0.0123568	ENSMUSG00000022548/ENSMUSG00000038147/ENSMUSG00000021457
GO:0090594	inflammatory response to wounding	3/222	31/23133	0.0967742	10.0841	4.98196	0.00321459	0.0178329	0.0123568	ENSMUSG00000004266/ENSMUSG00000025701/ENSMUSG00000034708
GO:0039532	negative regulation of cytoplasmic pattern recognition receptor signaling pathway	4/222	64/23133	0.0625	6.51267	4.34709	0.00334429	0.0184152	0.0127603	ENSMUSG00000023992/ENSMUSG00000073490/ENSMUSG00000039997/ENSMUSG00000090272
GO:0045058	T cell selection	4/222	64/23133	0.0625	6.51267	4.34709	0.00334429	0.0184152	0.0127603	ENSMUSG00000004707/ENSMUSG00000002603/ENSMUSG00000021457/ENSMUSG00000020143
GO:0045071	negative regulation of viral genome replication	4/222	64/23133	0.0625	6.51267	4.34709	0.00334429	0.0184152	0.0127603	ENSMUSG00000073490/ENSMUSG00000066800/ENSMUSG00000039997/ENSMUSG00000090272
GO:0070527	platelet aggregation	4/222	64/23133	0.0625	6.51267	4.34709	0.00334429	0.0184152	0.0127603	ENSMUSG00000024965/ENSMUSG00000021457/ENSMUSG00000020120/ENSMUSG00000004266
GO:0007204	positive regulation of cytosolic calcium ion concentration	7/222	201/23133	0.0348259	3.62895	3.68486	0.00336292	0.0184836	0.0128077	ENSMUSG00000100254/ENSMUSG00000052336/ENSMUSG00000049130/ENSMUSG00000020573/ENSMUSG00000040552/ENSMUSG00000042644/ENSMUSG00000042190
GO:0034765	regulation of monoatomic ion transmembrane transport	10/222	374/23133	0.026738	2.78617	3.42801	0.00343851	0.0188212	0.0130416	ENSMUSG00000023992/ENSMUSG00000020573/ENSMUSG00000038642/ENSMUSG00000002603/ENSMUSG00000017737/ENSMUSG00000048779/ENSMUSG00000030707/ENSMUSG00000009687/ENSMUSG00000004266/ENSMUSG00000031425
GO:0050878	regulation of body fluid levels	10/222	374/23133	0.026738	2.78617	3.42801	0.00343851	0.0188212	0.0130416	ENSMUSG00000112148/ENSMUSG00000058715/ENSMUSG00000024965/ENSMUSG00000021457/ENSMUSG00000024066/ENSMUSG00000042644/ENSMUSG00000020120/ENSMUSG00000021822/ENSMUSG00000004266/ENSMUSG00000028369
GO:0071260	cellular response to mechanical stimulus	5/222	105/23133	0.047619	4.96203	4.0054	0.0034547	0.0188212	0.0130416	ENSMUSG00000030653/ENSMUSG00000110195/ENSMUSG00000040522/ENSMUSG00000044583/ENSMUSG00000002603
GO:0071248	cellular response to metal ion	7/222	202/23133	0.0346535	3.61098	3.66885	0.00345593	0.0188212	0.0130416	ENSMUSG00000062515/ENSMUSG00000026177/ENSMUSG00000060063/ENSMUSG00000015340/ENSMUSG00000017737/ENSMUSG00000064267/ENSMUSG00000031659
GO:1901292	nucleoside phosphate catabolic process	7/222	202/23133	0.0346535	3.61098	3.66885	0.00345593	0.0188212	0.0130416	ENSMUSG00000030653/ENSMUSG00000110195/ENSMUSG00000025877/ENSMUSG00000015950/ENSMUSG00000024066/ENSMUSG00000026480/ENSMUSG00000036067
GO:0001945	lymph vessel development	3/222	32/23133	0.09375	9.769	4.8862	0.00352227	0.0191126	0.0132435	ENSMUSG00000021457/ENSMUSG00000000530/ENSMUSG00000028369
GO:0071276	cellular response to cadmium ion	3/222	32/23133	0.09375	9.769	4.8862	0.00352227	0.0191126	0.0132435	ENSMUSG00000026177/ENSMUSG00000015340/ENSMUSG00000017737
GO:0015844	monoamine transport	5/222	106/23133	0.0471698	4.91522	3.97696	0.00359796	0.0194525	0.013479	ENSMUSG00000058715/ENSMUSG00000059498/ENSMUSG00000021457/ENSMUSG00000024261/ENSMUSG00000047250
GO:0045921	positive regulation of exocytosis	5/222	106/23133	0.0471698	4.91522	3.97696	0.00359796	0.0194525	0.013479	ENSMUSG00000030786/ENSMUSG00000058715/ENSMUSG00000000290/ENSMUSG00000021457/ENSMUSG00000024261
GO:0043433	negative regulation of DNA-binding transcription factor activity	6/222	153/23133	0.0392157	4.08638	3.77035	0.0036597	0.0197504	0.0136855	ENSMUSG00000022126/ENSMUSG00000002111/ENSMUSG00000037860/ENSMUSG00000020399/ENSMUSG00000020227/ENSMUSG00000042190
GO:0071496	cellular response to external stimulus	5/222	107/23133	0.046729	4.86929	3.94888	0.00374545	0.0201766	0.0139808	ENSMUSG00000030653/ENSMUSG00000110195/ENSMUSG00000040522/ENSMUSG00000044583/ENSMUSG00000002603
GO:0002837	regulation of immune response to tumor cell	3/222	33/23133	0.0909091	9.47297	4.79455	0.00384734	0.020492	0.0141993	ENSMUSG00000002603/ENSMUSG00000020399/ENSMUSG00000079685
GO:0032647	regulation of interferon-alpha production	3/222	33/23133	0.0909091	9.47297	4.79455	0.00384734	0.020492	0.0141993	ENSMUSG00000040522/ENSMUSG00000044583/ENSMUSG00000020399
GO:0034138	toll-like receptor 3 signaling pathway	3/222	33/23133	0.0909091	9.47297	4.79455	0.00384734	0.020492	0.0141993	ENSMUSG00000020399/ENSMUSG00000039316/ENSMUSG00000036103
GO:0034405	response to fluid shear stress	3/222	33/23133	0.0909091	9.47297	4.79455	0.00384734	0.020492	0.0141993	ENSMUSG00000002603/ENSMUSG00000029304/ENSMUSG00000020681
GO:2000629	negative regulation of miRNA metabolic process	3/222	33/23133	0.0909091	9.47297	4.79455	0.00384734	0.020492	0.0141993	ENSMUSG00000112148/ENSMUSG00000112023/ENSMUSG00000002603
GO:0001866	NK T cell proliferation	2/222	10/23133	0.2	20.8405	6.17721	0.00392168	0.020492	0.0141993	ENSMUSG00000052142/ENSMUSG00000031103
GO:0002249	lymphocyte anergy	2/222	10/23133	0.2	20.8405	6.17721	0.00392168	0.020492	0.0141993	ENSMUSG00000112148/ENSMUSG00000112023
GO:0002604	regulation of dendritic cell antigen processing and presentation	2/222	10/23133	0.2	20.8405	6.17721	0.00392168	0.020492	0.0141993	ENSMUSG00000026177/ENSMUSG00000018774
GO:0002666	positive regulation of T cell tolerance induction	2/222	10/23133	0.2	20.8405	6.17721	0.00392168	0.020492	0.0141993	ENSMUSG00000112148/ENSMUSG00000112023
GO:0002667	regulation of T cell anergy	2/222	10/23133	0.2	20.8405	6.17721	0.00392168	0.020492	0.0141993	ENSMUSG00000112148/ENSMUSG00000112023
GO:0002835	negative regulation of response to tumor cell	2/222	10/23133	0.2	20.8405	6.17721	0.00392168	0.020492	0.0141993	ENSMUSG00000002603/ENSMUSG00000020399
GO:0002838	negative regulation of immune response to tumor cell	2/222	10/23133	0.2	20.8405	6.17721	0.00392168	0.020492	0.0141993	ENSMUSG00000002603/ENSMUSG00000020399
GO:0002870	T cell anergy	2/222	10/23133	0.2	20.8405	6.17721	0.00392168	0.020492	0.0141993	ENSMUSG00000112148/ENSMUSG00000112023
GO:0002911	regulation of lymphocyte anergy	2/222	10/23133	0.2	20.8405	6.17721	0.00392168	0.020492	0.0141993	ENSMUSG00000112148/ENSMUSG00000112023
GO:0031666	positive regulation of lipopolysaccharide-mediated signaling pathway	2/222	10/23133	0.2	20.8405	6.17721	0.00392168	0.020492	0.0141993	ENSMUSG00000021423/ENSMUSG00000021624
GO:0042117	monocyte activation	2/222	10/23133	0.2	20.8405	6.17721	0.00392168	0.020492	0.0141993	ENSMUSG00000112148/ENSMUSG00000112023
GO:1901856	negative regulation of cellular respiration	2/222	10/23133	0.2	20.8405	6.17721	0.00392168	0.020492	0.0141993	ENSMUSG00000030653/ENSMUSG00000110195
GO:0044703	multi-organism reproductive process	8/222	262/23133	0.0305344	3.18176	3.49604	0.0039278	0.020492	0.0141993	ENSMUSG00000022126/ENSMUSG00000030220/ENSMUSG00000002603/ENSMUSG00000017737/ENSMUSG00000020399/ENSMUSG00000031659/ENSMUSG00000020681/ENSMUSG00000034708
GO:0002834	regulation of response to tumor cell	3/222	34/23133	0.0882353	9.19436	4.70672	0.00419011	0.0217084	0.0150422	ENSMUSG00000002603/ENSMUSG00000020399/ENSMUSG00000079685
GO:0031295	T cell costimulation	3/222	34/23133	0.0882353	9.19436	4.70672	0.00419011	0.0217084	0.0150422	ENSMUSG00000034116/ENSMUSG00000112148/ENSMUSG00000112023
GO:0035020	regulation of Rac protein signal transduction	3/222	34/23133	0.0882353	9.19436	4.70672	0.00419011	0.0217084	0.0150422	ENSMUSG00000020573/ENSMUSG00000020143/ENSMUSG00000032356
GO:0050858	negative regulation of antigen receptor-mediated signaling pathway	3/222	34/23133	0.0882353	9.19436	4.70672	0.00419011	0.0217084	0.0150422	ENSMUSG00000112148/ENSMUSG00000112023/ENSMUSG00000004266
GO:0043547	positive regulation of GTPase activity	6/222	158/23133	0.0379747	3.95706	3.67132	0.00428119	0.0221418	0.0153425	ENSMUSG00000034116/ENSMUSG00000024451/ENSMUSG00000030844/ENSMUSG00000052085/ENSMUSG00000021886/ENSMUSG00000032356
GO:0051101	regulation of DNA binding	5/222	111/23133	0.045045	4.69382	3.83996	0.00437889	0.0225687	0.0156383	ENSMUSG00000002603/ENSMUSG00000073490/ENSMUSG00000017737/ENSMUSG00000039997/ENSMUSG00000090272
GO:0140029	exocytic process	5/222	111/23133	0.045045	4.69382	3.83996	0.00437889	0.0225687	0.0156383	ENSMUSG00000058715/ENSMUSG00000031264/ENSMUSG00000021457/ENSMUSG00000024261/ENSMUSG00000020120
GO:0044706	multi-multicellular organism process	8/222	267/23133	0.0299625	3.12218	3.43323	0.00439727	0.0226243	0.0156768	ENSMUSG00000022126/ENSMUSG00000030220/ENSMUSG00000002603/ENSMUSG00000017737/ENSMUSG00000020399/ENSMUSG00000031659/ENSMUSG00000020681/ENSMUSG00000034708
GO:0043405	regulation of MAP kinase activity	6/222	159/23133	0.0377358	3.93218	3.65201	0.00441429	0.0226727	0.0157104	ENSMUSG00000020573/ENSMUSG00000021457/ENSMUSG00000020227/ENSMUSG00000024013/ENSMUSG00000057967/ENSMUSG00000004266
GO:0032682	negative regulation of chemokine production	3/222	35/23133	0.0857143	8.93166	4.62245	0.00455085	0.0232938	0.0161407	ENSMUSG00000112148/ENSMUSG00000022548/ENSMUSG00000112023
GO:0060142	regulation of syncytium formation by plasma membrane fusion	3/222	35/23133	0.0857143	8.93166	4.62245	0.00455085	0.0232938	0.0161407	ENSMUSG00000040747/ENSMUSG00000023992/ENSMUSG00000030579
GO:0051898	negative regulation of phosphatidylinositol 3-kinase/protein kinase B signal transduction	4/222	70/23133	0.0571429	5.95444	4.08646	0.00461572	0.0235853	0.0163427	ENSMUSG00000023992/ENSMUSG00000024066/ENSMUSG00000037860/ENSMUSG00000024529
GO:0002536	respiratory burst involved in inflammatory response	2/222	11/23133	0.181818	18.9459	5.86018	0.00476296	0.0240489	0.016664	ENSMUSG00000015950/ENSMUSG00000034708
GO:0002579	positive regulation of antigen processing and presentation	2/222	11/23133	0.181818	18.9459	5.86018	0.00476296	0.0240489	0.016664	ENSMUSG00000026177/ENSMUSG00000023992
GO:0002725	negative regulation of T cell cytokine production	2/222	11/23133	0.181818	18.9459	5.86018	0.00476296	0.0240489	0.016664	ENSMUSG00000112148/ENSMUSG00000112023
GO:0002858	regulation of natural killer cell mediated cytotoxicity directed against tumor cell target	2/222	11/23133	0.181818	18.9459	5.86018	0.00476296	0.0240489	0.016664	ENSMUSG00000002603/ENSMUSG00000020399
GO:0019372	lipoxygenase pathway	2/222	11/23133	0.181818	18.9459	5.86018	0.00476296	0.0240489	0.016664	ENSMUSG00000060063/ENSMUSG00000025701
GO:0034616	response to laminar fluid shear stress	2/222	11/23133	0.181818	18.9459	5.86018	0.00476296	0.0240489	0.016664	ENSMUSG00000002603/ENSMUSG00000020681
GO:0045602	negative regulation of endothelial cell differentiation	2/222	11/23133	0.181818	18.9459	5.86018	0.00476296	0.0240489	0.016664	ENSMUSG00000024066/ENSMUSG00000000530
GO:1901136	carbohydrate derivative catabolic process	8/222	271/23133	0.0295203	3.07609	3.38404	0.00480302	0.0242102	0.0167757	ENSMUSG00000030653/ENSMUSG00000110195/ENSMUSG00000031264/ENSMUSG00000025877/ENSMUSG00000021322/ENSMUSG00000002603/ENSMUSG00000024066/ENSMUSG00000036067
GO:0032663	regulation of interleukin-2 production	4/222	71/23133	0.056338	5.87057	4.04596	0.00485514	0.0244315	0.0169291	ENSMUSG00000112148/ENSMUSG00000112023/ENSMUSG00000031101/ENSMUSG00000020399
GO:0010595	positive regulation of endothelial cell migration	5/222	114/23133	0.0438596	4.57029	3.76161	0.00490157	0.0246236	0.0170622	ENSMUSG00000020573/ENSMUSG00000002603/ENSMUSG00000048583/ENSMUSG00000057967/ENSMUSG00000034708
GO:0031294	lymphocyte costimulation	3/222	36/23133	0.0833333	8.68356	4.54147	0.00492982	0.0246408	0.0170741	ENSMUSG00000034116/ENSMUSG00000112148/ENSMUSG00000112023
GO:0032607	interferon-alpha production	3/222	36/23133	0.0833333	8.68356	4.54147	0.00492982	0.0246408	0.0170741	ENSMUSG00000040522/ENSMUSG00000044583/ENSMUSG00000020399
GO:0033280	response to vitamin D	3/222	36/23133	0.0833333	8.68356	4.54147	0.00492982	0.0246408	0.0170741	ENSMUSG00000002603/ENSMUSG00000053158/ENSMUSG00000029304
GO:0014074	response to purine-containing compound	6/222	163/23133	0.0368098	3.83568	3.57628	0.00497741	0.024837	0.0172101	ENSMUSG00000030653/ENSMUSG00000110195/ENSMUSG00000044583/ENSMUSG00000020573/ENSMUSG00000042644/ENSMUSG00000048779
GO:0030198	extracellular matrix organization	9/222	333/23133	0.027027	2.81629	3.28625	0.00505011	0.0251577	0.0174323	ENSMUSG00000038642/ENSMUSG00000002603/ENSMUSG00000022371/ENSMUSG00000017737/ENSMUSG00000021998/ENSMUSG00000035493/ENSMUSG00000006403/ENSMUSG00000005397/ENSMUSG00000024529
GO:0045229	external encapsulating structure organization	9/222	334/23133	0.0269461	2.80786	3.27597	0.00514789	0.0256019	0.0177401	ENSMUSG00000038642/ENSMUSG00000002603/ENSMUSG00000022371/ENSMUSG00000017737/ENSMUSG00000021998/ENSMUSG00000035493/ENSMUSG00000006403/ENSMUSG00000005397/ENSMUSG00000024529
GO:0031334	positive regulation of protein-containing complex assembly	7/222	218/23133	0.0321101	3.34596	3.4257	0.00522703	0.0259522	0.0179828	ENSMUSG00000031264/ENSMUSG00000022488/ENSMUSG00000002603/ENSMUSG00000021457/ENSMUSG00000021998/ENSMUSG00000053158/ENSMUSG00000020120
GO:0043062	extracellular structure organization	9/222	335/23133	0.0268657	2.79948	3.26574	0.00524713	0.0260087	0.0180219	ENSMUSG00000038642/ENSMUSG00000002603/ENSMUSG00000022371/ENSMUSG00000017737/ENSMUSG00000021998/ENSMUSG00000035493/ENSMUSG00000006403/ENSMUSG00000005397/ENSMUSG00000024529
GO:0071214	cellular response to abiotic stimulus	10/222	398/23133	0.0251256	2.61816	3.20535	0.0052986	0.0261767	0.0181383	ENSMUSG00000030653/ENSMUSG00000110195/ENSMUSG00000040522/ENSMUSG00000044583/ENSMUSG00000002603/ENSMUSG00000073490/ENSMUSG00000017737/ENSMUSG00000039997/ENSMUSG00000064267/ENSMUSG00000090272
GO:0104004	cellular response to environmental stimulus	10/222	398/23133	0.0251256	2.61816	3.20535	0.0052986	0.0261767	0.0181383	ENSMUSG00000030653/ENSMUSG00000110195/ENSMUSG00000040522/ENSMUSG00000044583/ENSMUSG00000002603/ENSMUSG00000073490/ENSMUSG00000017737/ENSMUSG00000039997/ENSMUSG00000064267/ENSMUSG00000090272
GO:0002313	mature B cell differentiation involved in immune response	3/222	37/23133	0.0810811	8.44887	4.46358	0.00532728	0.0262314	0.0181762	ENSMUSG00000112148/ENSMUSG00000002111/ENSMUSG00000041515
GO:0002418	immune response to tumor cell	3/222	37/23133	0.0810811	8.44887	4.46358	0.00532728	0.0262314	0.0181762	ENSMUSG00000002603/ENSMUSG00000020399/ENSMUSG00000079685
GO:0140895	cell surface toll-like receptor signaling pathway	4/222	74/23133	0.0540541	5.63258	3.92898	0.00562306	0.0274221	0.0190013	ENSMUSG00000022126/ENSMUSG00000023992/ENSMUSG00000025017/ENSMUSG00000044827
GO:0002420	natural killer cell mediated cytotoxicity directed against tumor cell target	2/222	12/23133	0.166667	17.3671	5.58239	0.00567956	0.0274221	0.0190013	ENSMUSG00000002603/ENSMUSG00000020399
GO:0002855	regulation of natural killer cell mediated immune response to tumor cell	2/222	12/23133	0.166667	17.3671	5.58239	0.00567956	0.0274221	0.0190013	ENSMUSG00000002603/ENSMUSG00000020399
GO:0010749	regulation of nitric oxide mediated signal transduction	2/222	12/23133	0.166667	17.3671	5.58239	0.00567956	0.0274221	0.0190013	ENSMUSG00000030653/ENSMUSG00000110195
GO:0030854	positive regulation of granulocyte differentiation	2/222	12/23133	0.166667	17.3671	5.58239	0.00567956	0.0274221	0.0190013	ENSMUSG00000093938/ENSMUSG00000022831
GO:0034144	negative regulation of toll-like receptor 4 signaling pathway	2/222	12/23133	0.166667	17.3671	5.58239	0.00567956	0.0274221	0.0190013	ENSMUSG00000022126/ENSMUSG00000023992
GO:0045588	positive regulation of gamma-delta T cell differentiation	2/222	12/23133	0.166667	17.3671	5.58239	0.00567956	0.0274221	0.0190013	ENSMUSG00000022488/ENSMUSG00000021457
GO:0046645	positive regulation of gamma-delta T cell activation	2/222	12/23133	0.166667	17.3671	5.58239	0.00567956	0.0274221	0.0190013	ENSMUSG00000022488/ENSMUSG00000021457
GO:0061517	macrophage proliferation	2/222	12/23133	0.166667	17.3671	5.58239	0.00567956	0.0274221	0.0190013	ENSMUSG00000024621/ENSMUSG00000023992
GO:0071659	negative regulation of IP-10 production	2/222	12/23133	0.166667	17.3671	5.58239	0.00567956	0.0274221	0.0190013	ENSMUSG00000112148/ENSMUSG00000112023
GO:0140052	cellular response to oxidised low-density lipoprotein particle stimulus	2/222	12/23133	0.166667	17.3671	5.58239	0.00567956	0.0274221	0.0190013	ENSMUSG00000023992/ENSMUSG00000018774
GO:1903010	regulation of bone development	2/222	12/23133	0.166667	17.3671	5.58239	0.00567956	0.0274221	0.0190013	ENSMUSG00000054675/ENSMUSG00000024529
GO:0002724	regulation of T cell cytokine production	3/222	38/23133	0.0789474	8.22653	4.38858	0.00574347	0.0275964	0.0191221	ENSMUSG00000112148/ENSMUSG00000112023/ENSMUSG00000031101
GO:0009595	detection of biotic stimulus	3/222	38/23133	0.0789474	8.22653	4.38858	0.00574347	0.0275964	0.0191221	ENSMUSG00000023992/ENSMUSG00000078945/ENSMUSG00000044827
GO:1901889	negative regulation of cell junction assembly	3/222	38/23133	0.0789474	8.22653	4.38858	0.00574347	0.0275964	0.0191221	ENSMUSG00000022548/ENSMUSG00000000530/ENSMUSG00000020681
GO:0030218	erythrocyte differentiation	6/222	168/23133	0.0357143	3.72153	3.48494	0.00575343	0.0275998	0.0191245	ENSMUSG00000002111/ENSMUSG00000022488/ENSMUSG00000022831/ENSMUSG00000033220/ENSMUSG00000026288/ENSMUSG00000032698
GO:0016485	protein processing	8/222	282/23133	0.0283688	2.95611	3.25331	0.00606765	0.0290593	0.0201358	ENSMUSG00000039062/ENSMUSG00000038642/ENSMUSG00000073490/ENSMUSG00000039997/ENSMUSG00000090272/ENSMUSG00000021822/ENSMUSG00000020681/ENSMUSG00000023000
GO:0050829	defense response to Gram-negative bacterium	5/222	120/23133	0.0416667	4.34178	3.61279	0.00607718	0.0290593	0.0201358	ENSMUSG00000069516/ENSMUSG00000026177/ENSMUSG00000023992/ENSMUSG00000046805/ENSMUSG00000076617
GO:0050731	positive regulation of peptidyl-tyrosine phosphorylation	6/222	170/23133	0.0352941	3.67774	3.44937	0.00608732	0.0290611	0.020137	ENSMUSG00000024621/ENSMUSG00000023992/ENSMUSG00000002603/ENSMUSG00000022831/ENSMUSG00000021457/ENSMUSG00000076617
GO:0045428	regulation of nitric oxide biosynthetic process	4/222	76/23133	0.0526316	5.48435	3.85448	0.00617764	0.0294027	0.0203737	ENSMUSG00000052336/ENSMUSG00000024397/ENSMUSG00000000290/ENSMUSG00000079685
GO:0033032	regulation of myeloid cell apoptotic process	3/222	39/23133	0.0769231	8.01559	4.31627	0.00617861	0.0294027	0.0203737	ENSMUSG00000058715/ENSMUSG00000026656/ENSMUSG00000029915
GO:0038061	non-canonical NF-kappaB signal transduction	5/222	121/23133	0.0413223	4.3059	3.58894	0.00629077	0.0298887	0.0207105	ENSMUSG00000002111/ENSMUSG00000023992/ENSMUSG00000044583/ENSMUSG00000020399/ENSMUSG00000044827
GO:0048661	positive regulation of smooth muscle cell proliferation	5/222	122/23133	0.0409836	4.2706	3.56534	0.00650958	0.030879	0.0213967	ENSMUSG00000024397/ENSMUSG00000002603/ENSMUSG00000040552/ENSMUSG00000017737/ENSMUSG00000048779
GO:0001781	neutrophil apoptotic process	2/222	13/23133	0.153846	16.0312	5.3362	0.00666998	0.0312419	0.0216482	ENSMUSG00000030786/ENSMUSG00000026656
GO:0002223	stimulatory C-type lectin receptor signaling pathway	2/222	13/23133	0.153846	16.0312	5.3362	0.00666998	0.0312419	0.0216482	ENSMUSG00000030579/ENSMUSG00000021457
GO:0002423	natural killer cell mediated immune response to tumor cell	2/222	13/23133	0.153846	16.0312	5.3362	0.00666998	0.0312419	0.0216482	ENSMUSG00000002603/ENSMUSG00000020399
GO:0030223	neutrophil differentiation	2/222	13/23133	0.153846	16.0312	5.3362	0.00666998	0.0312419	0.0216482	ENSMUSG00000093938/ENSMUSG00000026288
GO:0071612	IP-10 production	2/222	13/23133	0.153846	16.0312	5.3362	0.00666998	0.0312419	0.0216482	ENSMUSG00000112148/ENSMUSG00000112023
GO:0071658	regulation of IP-10 production	2/222	13/23133	0.153846	16.0312	5.3362	0.00666998	0.0312419	0.0216482	ENSMUSG00000112148/ENSMUSG00000112023
GO:1990840	response to lectin	2/222	13/23133	0.153846	16.0312	5.3362	0.00666998	0.0312419	0.0216482	ENSMUSG00000030579/ENSMUSG00000021457
GO:1990858	cellular response to lectin	2/222	13/23133	0.153846	16.0312	5.3362	0.00666998	0.0312419	0.0216482	ENSMUSG00000030579/ENSMUSG00000021457
GO:0002709	regulation of T cell mediated immunity	5/222	123/23133	0.0406504	4.23588	3.542	0.00673368	0.0314908	0.0218206	ENSMUSG00000112148/ENSMUSG00000022488/ENSMUSG00000112023/ENSMUSG00000031101/ENSMUSG00000079685
GO:0032677	regulation of interleukin-8 production	4/222	78/23133	0.0512821	5.34373	3.78258	0.00676743	0.0315495	0.0218613	ENSMUSG00000040522/ENSMUSG00000044583/ENSMUSG00000021457/ENSMUSG00000044827
GO:0035904	aorta development	4/222	78/23133	0.0512821	5.34373	3.78258	0.00676743	0.0315495	0.0218613	ENSMUSG00000030653/ENSMUSG00000110195/ENSMUSG00000000530/ENSMUSG00000024529
GO:0002752	cell surface pattern recognition receptor signaling pathway	4/222	79/23133	0.0506329	5.27609	3.74755	0.00707581	0.032782	0.0227153	ENSMUSG00000022126/ENSMUSG00000023992/ENSMUSG00000025017/ENSMUSG00000044827
GO:0032637	interleukin-8 production	4/222	79/23133	0.0506329	5.27609	3.74755	0.00707581	0.032782	0.0227153	ENSMUSG00000040522/ENSMUSG00000044583/ENSMUSG00000021457/ENSMUSG00000044827
GO:0080164	regulation of nitric oxide metabolic process	4/222	79/23133	0.0506329	5.27609	3.74755	0.00707581	0.032782	0.0227153	ENSMUSG00000052336/ENSMUSG00000024397/ENSMUSG00000000290/ENSMUSG00000079685
GO:1902893	regulation of miRNA transcription	4/222	79/23133	0.0506329	5.27609	3.74755	0.00707581	0.032782	0.0227153	ENSMUSG00000112148/ENSMUSG00000002111/ENSMUSG00000112023/ENSMUSG00000002603
GO:0045860	positive regulation of protein kinase activity	8/222	290/23133	0.0275862	2.87456	3.16215	0.00713582	0.0330087	0.0228724	ENSMUSG00000024621/ENSMUSG00000026177/ENSMUSG00000020573/ENSMUSG00000002699/ENSMUSG00000021457/ENSMUSG00000024013/ENSMUSG00000057967/ENSMUSG00000044827
GO:0007613	memory	6/222	176/23133	0.0340909	3.55236	3.34582	0.00717372	0.0331326	0.0229583	ENSMUSG00000052336/ENSMUSG00000023992/ENSMUSG00000048583/ENSMUSG00000024261/ENSMUSG00000042644/ENSMUSG00000047250
GO:0002312	B cell activation involved in immune response	5/222	125/23133	0.04	4.16811	3.49604	0.00719797	0.0331931	0.0230002	ENSMUSG00000112148/ENSMUSG00000002111/ENSMUSG00000002603/ENSMUSG00000021624/ENSMUSG00000041515
GO:0006469	negative regulation of protein kinase activity	6/222	177/23133	0.0338983	3.5323	3.329	0.00736757	0.0339227	0.0235057	ENSMUSG00000062515/ENSMUSG00000112148/ENSMUSG00000112023/ENSMUSG00000020227/ENSMUSG00000019876/ENSMUSG00000004266
GO:0031638	zymogen activation	4/222	80/23133	0.05	5.21014	3.71311	0.00739333	0.0339888	0.0235515	ENSMUSG00000073490/ENSMUSG00000039997/ENSMUSG00000090272/ENSMUSG00000021822
GO:0043277	apoptotic cell clearance	3/222	42/23133	0.0714286	7.44305	4.11392	0.00759988	0.0345882	0.0239669	ENSMUSG00000026390/ENSMUSG00000023992/ENSMUSG00000030579
GO:0045671	negative regulation of osteoclast differentiation	3/222	42/23133	0.0714286	7.44305	4.11392	0.00759988	0.0345882	0.0239669	ENSMUSG00000112148/ENSMUSG00000112023/ENSMUSG00000026288
GO:0052652	cyclic purine nucleotide metabolic process	3/222	42/23133	0.0714286	7.44305	4.11392	0.00759988	0.0345882	0.0239669	ENSMUSG00000030653/ENSMUSG00000110195/ENSMUSG00000031659
GO:0061081	positive regulation of myeloid leukocyte cytokine production involved in immune response	3/222	42/23133	0.0714286	7.44305	4.11392	0.00759988	0.0345882	0.0239669	ENSMUSG00000058715/ENSMUSG00000044583/ENSMUSG00000021457
GO:0039531	regulation of cytoplasmic pattern recognition receptor signaling pathway	5/222	127/23133	0.0393701	4.10247	3.45104	0.00768417	0.0345882	0.0239669	ENSMUSG00000031264/ENSMUSG00000023992/ENSMUSG00000073490/ENSMUSG00000039997/ENSMUSG00000090272
GO:0070588	calcium ion transmembrane transport	9/222	356/23133	0.0252809	2.63434	3.059	0.00769523	0.0345882	0.0239669	ENSMUSG00000100254/ENSMUSG00000020573/ENSMUSG00000002603/ENSMUSG00000042644/ENSMUSG00000048779/ENSMUSG00000030707/ENSMUSG00000018507/ENSMUSG00000004266/ENSMUSG00000031425
GO:0061614	miRNA transcription	4/222	81/23133	0.0493827	5.14581	3.67925	0.0077201	0.0345882	0.0239669	ENSMUSG00000112148/ENSMUSG00000002111/ENSMUSG00000112023/ENSMUSG00000002603
GO:0002664	regulation of T cell tolerance induction	2/222	14/23133	0.142857	14.8861	5.11589	0.00773272	0.0345882	0.0239669	ENSMUSG00000112148/ENSMUSG00000112023
GO:0009214	cyclic nucleotide catabolic process	2/222	14/23133	0.142857	14.8861	5.11589	0.00773272	0.0345882	0.0239669	ENSMUSG00000030653/ENSMUSG00000110195
GO:0010572	positive regulation of platelet activation	2/222	14/23133	0.142857	14.8861	5.11589	0.00773272	0.0345882	0.0239669	ENSMUSG00000020120/ENSMUSG00000028369
GO:0010936	negative regulation of macrophage cytokine production	2/222	14/23133	0.142857	14.8861	5.11589	0.00773272	0.0345882	0.0239669	ENSMUSG00000002603/ENSMUSG00000020227
GO:0032490	detection of molecule of bacterial origin	2/222	14/23133	0.142857	14.8861	5.11589	0.00773272	0.0345882	0.0239669	ENSMUSG00000023992/ENSMUSG00000044827
GO:0032815	negative regulation of natural killer cell activation	2/222	14/23133	0.142857	14.8861	5.11589	0.00773272	0.0345882	0.0239669	ENSMUSG00000112148/ENSMUSG00000020399
GO:0042447	hormone catabolic process	2/222	14/23133	0.142857	14.8861	5.11589	0.00773272	0.0345882	0.0239669	ENSMUSG00000029304/ENSMUSG00000020681
GO:0060179	male mating behavior	2/222	14/23133	0.142857	14.8861	5.11589	0.00773272	0.0345882	0.0239669	ENSMUSG00000100254/ENSMUSG00000034708
GO:0097011	cellular response to granulocyte macrophage colony-stimulating factor stimulus	2/222	14/23133	0.142857	14.8861	5.11589	0.00773272	0.0345882	0.0239669	ENSMUSG00000030653/ENSMUSG00000110195
GO:1900272	negative regulation of long-term synaptic potentiation	2/222	14/23133	0.142857	14.8861	5.11589	0.00773272	0.0345882	0.0239669	ENSMUSG00000052336/ENSMUSG00000030579
GO:1903977	positive regulation of glial cell migration	2/222	14/23133	0.142857	14.8861	5.11589	0.00773272	0.0345882	0.0239669	ENSMUSG00000052336/ENSMUSG00000023992
GO:0010810	regulation of cell-substrate adhesion	7/222	235/23133	0.0297872	3.10391	3.19098	0.00777804	0.0347388	0.0240712	ENSMUSG00000022548/ENSMUSG00000033220/ENSMUSG00000029304/ENSMUSG00000000530/ENSMUSG00000021822/ENSMUSG00000005397/ENSMUSG00000064080
GO:0016032	viral process	9/222	357/23133	0.0252101	2.62696	3.04953	0.0078304	0.0348681	0.0241608	ENSMUSG00000027322/ENSMUSG00000050370/ENSMUSG00000024621/ENSMUSG00000073490/ENSMUSG00000066800/ENSMUSG00000039997/ENSMUSG00000029915/ENSMUSG00000090272/ENSMUSG00000039853
GO:0051347	positive regulation of transferase activity	9/222	357/23133	0.0252101	2.62696	3.04953	0.0078304	0.0348681	0.0241608	ENSMUSG00000024621/ENSMUSG00000026177/ENSMUSG00000023992/ENSMUSG00000020573/ENSMUSG00000002699/ENSMUSG00000021457/ENSMUSG00000024013/ENSMUSG00000057967/ENSMUSG00000044827
GO:0009187	cyclic nucleotide metabolic process	3/222	43/23133	0.0697674	7.26996	4.05087	0.0081129	0.0358049	0.02481	ENSMUSG00000030653/ENSMUSG00000110195/ENSMUSG00000031659
GO:0030866	cortical actin cytoskeleton organization	3/222	43/23133	0.0697674	7.26996	4.05087	0.0081129	0.0358049	0.02481	ENSMUSG00000022488/ENSMUSG00000055805/ENSMUSG00000020120
GO:0032689	negative regulation of type II interferon production	3/222	43/23133	0.0697674	7.26996	4.05087	0.0081129	0.0358049	0.02481	ENSMUSG00000112148/ENSMUSG00000112023/ENSMUSG00000020399
GO:0045589	regulation of regulatory T cell differentiation	3/222	43/23133	0.0697674	7.26996	4.05087	0.0081129	0.0358049	0.02481	ENSMUSG00000112148/ENSMUSG00000112023/ENSMUSG00000002603
GO:1900744	regulation of p38MAPK cascade	3/222	43/23133	0.0697674	7.26996	4.05087	0.0081129	0.0358049	0.02481	ENSMUSG00000002111/ENSMUSG00000023992/ENSMUSG00000024066
GO:1904646	cellular response to amyloid-beta	3/222	43/23133	0.0697674	7.26996	4.05087	0.0081129	0.0358049	0.02481	ENSMUSG00000023992/ENSMUSG00000026656/ENSMUSG00000021457
GO:0010594	regulation of endothelial cell migration	6/222	181/23133	0.0331492	3.45423	3.26292	0.00818093	0.0360506	0.0249802	ENSMUSG00000020573/ENSMUSG00000002603/ENSMUSG00000048583/ENSMUSG00000000530/ENSMUSG00000057967/ENSMUSG00000034708
GO:0043534	blood vessel endothelial cell migration	5/222	129/23133	0.0387597	4.03886	3.40695	0.00819277	0.0360506	0.0249802	ENSMUSG00000002603/ENSMUSG00000048583/ENSMUSG00000000530/ENSMUSG00000057967/ENSMUSG00000025473
GO:0034101	erythrocyte homeostasis	6/222	182/23133	0.032967	3.43525	3.24669	0.00839397	0.0368074	0.0255046	ENSMUSG00000002111/ENSMUSG00000022488/ENSMUSG00000022831/ENSMUSG00000033220/ENSMUSG00000026288/ENSMUSG00000032698
GO:0043123	positive regulation of canonical NF-kappaB signal transduction	6/222	182/23133	0.032967	3.43525	3.24669	0.00839397	0.0368074	0.0255046	ENSMUSG00000052336/ENSMUSG00000040522/ENSMUSG00000044583/ENSMUSG00000002603/ENSMUSG00000030144/ENSMUSG00000020227
GO:0071479	cellular response to ionizing radiation	4/222	83/23133	0.0481928	5.02182	3.61316	0.00840183	0.0368074	0.0255046	ENSMUSG00000002603/ENSMUSG00000073490/ENSMUSG00000039997/ENSMUSG00000090272
GO:0002520	immune system development	7/222	239/23133	0.0292887	3.05196	3.13883	0.0084926	0.037096	0.0257046	ENSMUSG00000022126/ENSMUSG00000112148/ENSMUSG00000112023/ENSMUSG00000002603/ENSMUSG00000040552/ENSMUSG00000020399/ENSMUSG00000020227
GO:0050679	positive regulation of epithelial cell proliferation	7/222	239/23133	0.0292887	3.05196	3.13883	0.0084926	0.037096	0.0257046	ENSMUSG00000031264/ENSMUSG00000049130/ENSMUSG00000002603/ENSMUSG00000048583/ENSMUSG00000000530/ENSMUSG00000057967/ENSMUSG00000034708
GO:0007566	embryo implantation	4/222	84/23133	0.047619	4.96203	3.5809	0.008757	0.0380834	0.0263887	ENSMUSG00000022126/ENSMUSG00000030220/ENSMUSG00000017737/ENSMUSG00000034708
GO:0051279	regulation of release of sequestered calcium ion into cytosol	4/222	84/23133	0.047619	4.96203	3.5809	0.008757	0.0380834	0.0263887	ENSMUSG00000002603/ENSMUSG00000048779/ENSMUSG00000030707/ENSMUSG00000004266
GO:0070098	chemokine-mediated signaling pathway	4/222	84/23133	0.047619	4.96203	3.5809	0.008757	0.0380834	0.0263887	ENSMUSG00000052336/ENSMUSG00000023992/ENSMUSG00000019122/ENSMUSG00000018927
GO:0009624	response to nematode	2/222	15/23133	0.133333	13.8937	4.9171	0.00886632	0.0381687	0.0264479	ENSMUSG00000112148/ENSMUSG00000029919
GO:0032645	regulation of granulocyte macrophage colony-stimulating factor production	2/222	15/23133	0.133333	13.8937	4.9171	0.00886632	0.0381687	0.0264479	ENSMUSG00000038147/ENSMUSG00000021457
GO:0045586	regulation of gamma-delta T cell differentiation	2/222	15/23133	0.133333	13.8937	4.9171	0.00886632	0.0381687	0.0264479	ENSMUSG00000022488/ENSMUSG00000021457
GO:0045651	positive regulation of macrophage differentiation	2/222	15/23133	0.133333	13.8937	4.9171	0.00886632	0.0381687	0.0264479	ENSMUSG00000002603/ENSMUSG00000022831
GO:0046643	regulation of gamma-delta T cell activation	2/222	15/23133	0.133333	13.8937	4.9171	0.00886632	0.0381687	0.0264479	ENSMUSG00000022488/ENSMUSG00000021457
GO:0097012	response to granulocyte macrophage colony-stimulating factor	2/222	15/23133	0.133333	13.8937	4.9171	0.00886632	0.0381687	0.0264479	ENSMUSG00000030653/ENSMUSG00000110195
GO:1900426	positive regulation of defense response to bacterium	2/222	15/23133	0.133333	13.8937	4.9171	0.00886632	0.0381687	0.0264479	ENSMUSG00000020399/ENSMUSG00000034708
GO:0001649	osteoblast differentiation	7/222	242/23133	0.0289256	3.01413	3.10044	0.00905939	0.0389436	0.0269848	ENSMUSG00000029816/ENSMUSG00000054675/ENSMUSG00000048583/ENSMUSG00000029304/ENSMUSG00000029915/ENSMUSG00000023000/ENSMUSG00000024529
GO:0032735	positive regulation of interleukin-12 production	3/222	45/23133	0.0666667	6.94685	3.93062	0.00919885	0.0394861	0.0273607	ENSMUSG00000021457/ENSMUSG00000041515/ENSMUSG00000001741
GO:0052548	regulation of endopeptidase activity	8/222	306/23133	0.0261438	2.72425	2.98881	0.00969143	0.0415407	0.0287844	ENSMUSG00000073490/ENSMUSG00000021457/ENSMUSG00000017737/ENSMUSG00000024066/ENSMUSG00000037860/ENSMUSG00000039997/ENSMUSG00000090272/ENSMUSG00000078945
GO:0010935	regulation of macrophage cytokine production	3/222	46/23133	0.0652174	6.79583	3.87322	0.0097721	0.0417662	0.0289407	ENSMUSG00000044583/ENSMUSG00000002603/ENSMUSG00000020227
GO:0070269	pyroptotic inflammatory response	3/222	46/23133	0.0652174	6.79583	3.87322	0.0097721	0.0417662	0.0289407	ENSMUSG00000023992/ENSMUSG00000037860/ENSMUSG00000078945
GO:0051209	release of sequestered calcium ion into cytosol	5/222	135/23133	0.037037	3.85936	3.27983	0.00985793	0.0420504	0.0291376	ENSMUSG00000002603/ENSMUSG00000042644/ENSMUSG00000048779/ENSMUSG00000030707/ENSMUSG00000004266
GO:0007193	adenylate cyclase-inhibiting G protein-coupled receptor signaling pathway	4/222	87/23133	0.045977	4.79093	3.48713	0.00988092	0.0420504	0.0291376	ENSMUSG00000030653/ENSMUSG00000026390/ENSMUSG00000110195/ENSMUSG00000031659
GO:0070228	regulation of lymphocyte apoptotic process	4/222	87/23133	0.045977	4.79093	3.48713	0.00988092	0.0420504	0.0291376	ENSMUSG00000027322/ENSMUSG00000052085/ENSMUSG00000102037/ENSMUSG00000025473
GO:0002517	T cell tolerance induction	2/222	16/23133	0.125	13.0253	4.73645	0.0100693	0.0421892	0.0292338	ENSMUSG00000112148/ENSMUSG00000112023
GO:0002638	negative regulation of immunoglobulin production	2/222	16/23133	0.125	13.0253	4.73645	0.0100693	0.0421892	0.0292338	ENSMUSG00000112148/ENSMUSG00000026656
GO:0010752	regulation of cGMP-mediated signaling	2/222	16/23133	0.125	13.0253	4.73645	0.0100693	0.0421892	0.0292338	ENSMUSG00000030653/ENSMUSG00000110195
GO:0030644	intracellular chloride ion homeostasis	2/222	16/23133	0.125	13.0253	4.73645	0.0100693	0.0421892	0.0292338	ENSMUSG00000029925/ENSMUSG00000029304
GO:0043951	negative regulation of cAMP-mediated signaling	2/222	16/23133	0.125	13.0253	4.73645	0.0100693	0.0421892	0.0292338	ENSMUSG00000030653/ENSMUSG00000110195
GO:0046415	urate metabolic process	2/222	16/23133	0.125	13.0253	4.73645	0.0100693	0.0421892	0.0292338	ENSMUSG00000029304/ENSMUSG00000029299
GO:0051895	negative regulation of focal adhesion assembly	2/222	16/23133	0.125	13.0253	4.73645	0.0100693	0.0421892	0.0292338	ENSMUSG00000022548/ENSMUSG00000000530
GO:0071801	regulation of podosome assembly	2/222	16/23133	0.125	13.0253	4.73645	0.0100693	0.0421892	0.0292338	ENSMUSG00000021998/ENSMUSG00000003283
GO:0150079	negative regulation of neuroinflammatory response	2/222	16/23133	0.125	13.0253	4.73645	0.0100693	0.0421892	0.0292338	ENSMUSG00000023992/ENSMUSG00000034708
GO:0150118	negative regulation of cell-substrate junction organization	2/222	16/23133	0.125	13.0253	4.73645	0.0100693	0.0421892	0.0292338	ENSMUSG00000022548/ENSMUSG00000000530
GO:1904044	response to aldosterone	2/222	16/23133	0.125	13.0253	4.73645	0.0100693	0.0421892	0.0292338	ENSMUSG00000015340/ENSMUSG00000020681
GO:0051283	negative regulation of sequestering of calcium ion	5/222	136/23133	0.0367647	3.83098	3.25936	0.0101564	0.0424943	0.0294452	ENSMUSG00000002603/ENSMUSG00000042644/ENSMUSG00000048779/ENSMUSG00000030707/ENSMUSG00000004266
GO:0033673	negative regulation of kinase activity	6/222	190/23133	0.0315789	3.29061	3.12079	0.0102439	0.0428004	0.0296573	ENSMUSG00000062515/ENSMUSG00000112148/ENSMUSG00000112023/ENSMUSG00000020227/ENSMUSG00000019876/ENSMUSG00000004266
GO:1900181	negative regulation of protein localization to nucleus	3/222	47/23133	0.0638298	6.65124	3.8175	0.0103657	0.0432486	0.0299678	ENSMUSG00000112148/ENSMUSG00000022548/ENSMUSG00000112023
GO:0032481	positive regulation of type I interferon production	4/222	89/23133	0.0449438	4.68327	3.42697	0.0106799	0.0444969	0.0308328	ENSMUSG00000040522/ENSMUSG00000044583/ENSMUSG00000021457/ENSMUSG00000029771
GO:0035296	regulation of tube diameter	6/222	192/23133	0.03125	3.25633	3.09036	0.0107483	0.0445331	0.0308579	ENSMUSG00000029925/ENSMUSG00000052821/ENSMUSG00000047250/ENSMUSG00000020681/ENSMUSG00000025701/ENSMUSG00000028369
GO:0050792	regulation of viral process	6/222	192/23133	0.03125	3.25633	3.09036	0.0107483	0.0445331	0.0308579	ENSMUSG00000050370/ENSMUSG00000073490/ENSMUSG00000066800/ENSMUSG00000039997/ENSMUSG00000090272/ENSMUSG00000039853
GO:0097746	blood vessel diameter maintenance	6/222	192/23133	0.03125	3.25633	3.09036	0.0107483	0.0445331	0.0308579	ENSMUSG00000029925/ENSMUSG00000052821/ENSMUSG00000047250/ENSMUSG00000020681/ENSMUSG00000025701/ENSMUSG00000028369
GO:1903169	regulation of calcium ion transmembrane transport	6/222	192/23133	0.03125	3.25633	3.09036	0.0107483	0.0445331	0.0308579	ENSMUSG00000020573/ENSMUSG00000002603/ENSMUSG00000048779/ENSMUSG00000030707/ENSMUSG00000004266/ENSMUSG00000031425
GO:0051282	regulation of sequestering of calcium ion	5/222	138/23133	0.0362319	3.77546	3.21898	0.0107718	0.0445685	0.0308824	ENSMUSG00000002603/ENSMUSG00000042644/ENSMUSG00000048779/ENSMUSG00000030707/ENSMUSG00000004266
GO:0001937	negative regulation of endothelial cell proliferation	3/222	48/23133	0.0625	6.51267	3.76338	0.0109798	0.0451158	0.0312617	ENSMUSG00000024066/ENSMUSG00000000530/ENSMUSG00000025701
GO:0009268	response to pH	3/222	48/23133	0.0625	6.51267	3.76338	0.0109798	0.0451158	0.0312617	ENSMUSG00000038642/ENSMUSG00000064267/ENSMUSG00000021886
GO:0043368	positive T cell selection	3/222	48/23133	0.0625	6.51267	3.76338	0.0109798	0.0451158	0.0312617	ENSMUSG00000004707/ENSMUSG00000002603/ENSMUSG00000020143
GO:0045066	regulatory T cell differentiation	3/222	48/23133	0.0625	6.51267	3.76338	0.0109798	0.0451158	0.0312617	ENSMUSG00000112148/ENSMUSG00000112023/ENSMUSG00000002603
GO:2001259	positive regulation of cation channel activity	3/222	48/23133	0.0625	6.51267	3.76338	0.0109798	0.0451158	0.0312617	ENSMUSG00000023992/ENSMUSG00000038642/ENSMUSG00000048779
GO:0035150	regulation of tube size	6/222	193/23133	0.0310881	3.23946	3.07529	0.011007	0.0451652	0.0312959	ENSMUSG00000029925/ENSMUSG00000052821/ENSMUSG00000047250/ENSMUSG00000020681/ENSMUSG00000025701/ENSMUSG00000028369
GO:0002292	T cell differentiation involved in immune response	4/222	90/23133	0.0444444	4.63123	3.39756	0.0110945	0.0453991	0.031458	ENSMUSG00000004707/ENSMUSG00000058715/ENSMUSG00000002603/ENSMUSG00000030144
GO:0006809	nitric oxide biosynthetic process	4/222	90/23133	0.0444444	4.63123	3.39756	0.0110945	0.0453991	0.031458	ENSMUSG00000052336/ENSMUSG00000024397/ENSMUSG00000000290/ENSMUSG00000079685
GO:0002431	Fc receptor mediated stimulatory signaling pathway	2/222	17/23133	0.117647	12.2591	4.57124	0.0113403	0.0459006	0.0318055	ENSMUSG00000058715/ENSMUSG00000020437
GO:0010832	negative regulation of myotube differentiation	2/222	17/23133	0.117647	12.2591	4.57124	0.0113403	0.0459006	0.0318055	ENSMUSG00000024621/ENSMUSG00000054675
GO:0016045	detection of bacterium	2/222	17/23133	0.117647	12.2591	4.57124	0.0113403	0.0459006	0.0318055	ENSMUSG00000078945/ENSMUSG00000044827
GO:0030002	intracellular monoatomic anion homeostasis	2/222	17/23133	0.117647	12.2591	4.57124	0.0113403	0.0459006	0.0318055	ENSMUSG00000029925/ENSMUSG00000029304
GO:0032604	granulocyte macrophage colony-stimulating factor production	2/222	17/23133	0.117647	12.2591	4.57124	0.0113403	0.0459006	0.0318055	ENSMUSG00000038147/ENSMUSG00000021457
GO:0045342	MHC class II biosynthetic process	2/222	17/23133	0.117647	12.2591	4.57124	0.0113403	0.0459006	0.0318055	ENSMUSG00000002111/ENSMUSG00000026177
GO:0051132	NK T cell activation	2/222	17/23133	0.117647	12.2591	4.57124	0.0113403	0.0459006	0.0318055	ENSMUSG00000052142/ENSMUSG00000031103
GO:0071285	cellular response to lithium ion	2/222	17/23133	0.117647	12.2591	4.57124	0.0113403	0.0459006	0.0318055	ENSMUSG00000062515/ENSMUSG00000031659
GO:0035710	CD4-positive, alpha-beta T cell activation	5/222	140/23133	0.0357143	3.72153	3.17936	0.0114123	0.0460668	0.0319206	ENSMUSG00000004707/ENSMUSG00000112148/ENSMUSG00000022488/ENSMUSG00000002603/ENSMUSG00000031101
GO:0051208	sequestering of calcium ion	5/222	140/23133	0.0357143	3.72153	3.17936	0.0114123	0.0460668	0.0319206	ENSMUSG00000002603/ENSMUSG00000042644/ENSMUSG00000048779/ENSMUSG00000030707/ENSMUSG00000004266
GO:0001933	negative regulation of protein phosphorylation	8/222	316/23133	0.0253165	2.63804	2.88603	0.0116019	0.0466934	0.0323548	ENSMUSG00000062515/ENSMUSG00000112148/ENSMUSG00000112023/ENSMUSG00000002603/ENSMUSG00000024066/ENSMUSG00000020227/ENSMUSG00000019876/ENSMUSG00000004266
GO:0030501	positive regulation of bone mineralization	3/222	49/23133	0.0612245	6.37976	3.71079	0.0116146	0.0466934	0.0323548	ENSMUSG00000024621/ENSMUSG00000054675/ENSMUSG00000025701
GO:0043392	negative regulation of DNA binding	3/222	49/23133	0.0612245	6.37976	3.71079	0.0116146	0.0466934	0.0323548	ENSMUSG00000073490/ENSMUSG00000039997/ENSMUSG00000090272
GO:0034341	response to type II interferon	5/222	141/23133	0.035461	3.69513	3.15982	0.0117421	0.0471424	0.0326659	ENSMUSG00000026712/ENSMUSG00000022126/ENSMUSG00000026177/ENSMUSG00000024397/ENSMUSG00000041515
GO:0010038	response to metal ion	9/222	382/23133	0.0235602	2.45504	2.82271	0.0118359	0.0474551	0.0328826	ENSMUSG00000062515/ENSMUSG00000026177/ENSMUSG00000060063/ENSMUSG00000015340/ENSMUSG00000017737/ENSMUSG00000024066/ENSMUSG00000042644/ENSMUSG00000064267/ENSMUSG00000031659
GO:0034109	homotypic cell-cell adhesion	4/222	92/23133	0.0434783	4.53055	3.34	0.0119546	0.0478667	0.0331678	ENSMUSG00000024965/ENSMUSG00000021457/ENSMUSG00000020120/ENSMUSG00000004266
GO:0097553	calcium ion transmembrane import into cytosol	6/222	197/23133	0.0304569	3.17369	3.01601	0.0120859	0.0483275	0.0334872	ENSMUSG00000002603/ENSMUSG00000042644/ENSMUSG00000048779/ENSMUSG00000030707/ENSMUSG00000018507/ENSMUSG00000004266
GO:0043114	regulation of vascular permeability	3/222	50/23133	0.06	6.25216	3.65964	0.0122701	0.048998	0.0339517	ENSMUSG00000030653/ENSMUSG00000110195/ENSMUSG00000002603

## Sheet: molecular_function
GOID	Description	GeneRatio	BgRatio	RichFactor	FoldEnrichment	zScore	pvalue	p.adjust	qvalue	geneID
GO:0140375	immune receptor activity	15/216	142/22627	0.105634	11.0656	11.8124	7.19127e-12	3.26484e-09	2.72511e-09	ENSMUSG00000052336/ENSMUSG00000058818/ENSMUSG00000112148/ENSMUSG00000058715/ENSMUSG00000049130/ENSMUSG00000112023/ENSMUSG00000071713/ENSMUSG00000059498/ENSMUSG00000026656/ENSMUSG00000015947/ENSMUSG00000040552/ENSMUSG00000003206/ENSMUSG00000071714/ENSMUSG00000042190/ENSMUSG00000030745
GO:0005178	integrin binding	12/216	156/22627	0.0769231	8.05805	8.68432	3.55081e-08	8.06034e-06	6.72785e-06	ENSMUSG00000029816/ENSMUSG00000030786/ENSMUSG00000112148/ENSMUSG00000000290/ENSMUSG00000024965/ENSMUSG00000021457/ENSMUSG00000048583/ENSMUSG00000021998/ENSMUSG00000029304/ENSMUSG00000030830/ENSMUSG00000025473/ENSMUSG00000028369
GO:0050839	cell adhesion molecule binding	16/216	311/22627	0.0514469	5.38931	7.65188	5.66029e-08	8.56591e-06	7.14985e-06	ENSMUSG00000029816/ENSMUSG00000030786/ENSMUSG00000058818/ENSMUSG00000112148/ENSMUSG00000000290/ENSMUSG00000024965/ENSMUSG00000021457/ENSMUSG00000048583/ENSMUSG00000021998/ENSMUSG00000035493/ENSMUSG00000029304/ENSMUSG00000009687/ENSMUSG00000030830/ENSMUSG00000004266/ENSMUSG00000025473/ENSMUSG00000028369
GO:0030695	GTPase regulator activity	18/216	432/22627	0.0416667	4.36478	6.93219	1.98226e-07	1.79989e-05	1.50235e-05	ENSMUSG00000034116/ENSMUSG00000035697/ENSMUSG00000048865/ENSMUSG00000030220/ENSMUSG00000022488/ENSMUSG00000052142/ENSMUSG00000026979/ENSMUSG00000030047/ENSMUSG00000018008/ENSMUSG00000024451/ENSMUSG00000002668/ENSMUSG00000030844/ENSMUSG00000052085/ENSMUSG00000034786/ENSMUSG00000024013/ENSMUSG00000033450/ENSMUSG00000020143/ENSMUSG00000032356
GO:0060589	nucleoside-triphosphatase regulator activity	18/216	432/22627	0.0416667	4.36478	6.93219	1.98226e-07	1.79989e-05	1.50235e-05	ENSMUSG00000034116/ENSMUSG00000035697/ENSMUSG00000048865/ENSMUSG00000030220/ENSMUSG00000022488/ENSMUSG00000052142/ENSMUSG00000026979/ENSMUSG00000030047/ENSMUSG00000018008/ENSMUSG00000024451/ENSMUSG00000002668/ENSMUSG00000030844/ENSMUSG00000052085/ENSMUSG00000034786/ENSMUSG00000024013/ENSMUSG00000033450/ENSMUSG00000020143/ENSMUSG00000032356
GO:0034987	immunoglobulin receptor binding	5/216	18/22627	0.277778	29.0985	11.7079	5.86075e-07	4.43463e-05	3.70153e-05	ENSMUSG00000059498/ENSMUSG00000030144/ENSMUSG00000053158/ENSMUSG00000076617/ENSMUSG00000025473
GO:0019763	immunoglobulin receptor activity	4/216	10/22627	0.4	41.9019	12.7006	1.6215e-06	0.000105166	8.77805e-05	ENSMUSG00000058715/ENSMUSG00000059498/ENSMUSG00000026656/ENSMUSG00000015947
GO:0038024	cargo receptor activity	7/216	67/22627	0.104478	10.9445	8.00298	3.5071e-06	0.000199028	0.000166126	ENSMUSG00000026712/ENSMUSG00000042286/ENSMUSG00000026390/ENSMUSG00000030786/ENSMUSG00000025044/ENSMUSG00000000290/ENSMUSG00000036103
GO:0001784	phosphotyrosine residue binding	6/216	49/22627	0.122449	12.8271	8.13643	7.00938e-06	0.000338557	0.000282589	ENSMUSG00000034116/ENSMUSG00000022372/ENSMUSG00000021457/ENSMUSG00000004837/ENSMUSG00000004266/ENSMUSG00000003283
GO:0001848	complement binding	5/216	29/22627	0.172414	18.0611	9.02552	7.45721e-06	0.000338557	0.000282589	ENSMUSG00000027435/ENSMUSG00000030786/ENSMUSG00000049130/ENSMUSG00000040552/ENSMUSG00000000290
GO:0030169	low-density lipoprotein particle binding	4/216	18/22627	0.222222	23.2788	9.28298	2.22508e-05	0.000918349	0.000766533	ENSMUSG00000042286/ENSMUSG00000023992/ENSMUSG00000025044/ENSMUSG00000036103
GO:0038187	pattern recognition receptor activity	6/216	63/22627	0.0952381	9.97663	7.00448	3.04767e-05	0.00115303	0.000962421	ENSMUSG00000040522/ENSMUSG00000044583/ENSMUSG00000030144/ENSMUSG00000037860/ENSMUSG00000049037/ENSMUSG00000036103
GO:0045309	protein phosphorylated amino acid binding	6/216	65/22627	0.0923077	9.66966	6.87179	3.64667e-05	0.00127353	0.001063	ENSMUSG00000034116/ENSMUSG00000022372/ENSMUSG00000021457/ENSMUSG00000004837/ENSMUSG00000004266/ENSMUSG00000003283
GO:0001540	amyloid-beta binding	6/216	70/22627	0.0857143	8.97897	6.5638	5.56385e-05	0.00180428	0.001506	ENSMUSG00000026390/ENSMUSG00000058818/ENSMUSG00000023992/ENSMUSG00000025044/ENSMUSG00000026656/ENSMUSG00000000290
GO:0042169	SH2 domain binding	5/216	45/22627	0.111111	11.6394	7.01362	6.7767e-05	0.00205108	0.00171201	ENSMUSG00000058818/ENSMUSG00000061132/ENSMUSG00000021457/ENSMUSG00000040751/ENSMUSG00000004266
GO:0005096	GTPase activator activity	10/216	238/22627	0.0420168	4.40146	5.17888	0.000102379	0.00290502	0.00242478	ENSMUSG00000035697/ENSMUSG00000048865/ENSMUSG00000030220/ENSMUSG00000022488/ENSMUSG00000052142/ENSMUSG00000030047/ENSMUSG00000024451/ENSMUSG00000030844/ENSMUSG00000033450/ENSMUSG00000020143
GO:0019865	immunoglobulin binding	4/216	28/22627	0.142857	14.9649	7.25895	0.000138146	0.00368931	0.00307941	ENSMUSG00000058715/ENSMUSG00000059498/ENSMUSG00000026656/ENSMUSG00000015947
GO:0005085	guanyl-nucleotide exchange factor activity	9/216	205/22627	0.0439024	4.59898	5.08183	0.000163686	0.00393813	0.0032871	ENSMUSG00000034116/ENSMUSG00000026979/ENSMUSG00000018008/ENSMUSG00000002668/ENSMUSG00000052085/ENSMUSG00000024013/ENSMUSG00000033450/ENSMUSG00000020143/ENSMUSG00000032356
GO:0032393	MHC class I receptor activity	3/216	12/22627	0.25	26.1887	8.56836	0.000177116	0.00393813	0.0032871	ENSMUSG00000058818/ENSMUSG00000112148/ENSMUSG00000112023
GO:0035325	Toll-like receptor binding	3/216	12/22627	0.25	26.1887	8.56836	0.000177116	0.00393813	0.0032871	ENSMUSG00000021457/ENSMUSG00000040026/ENSMUSG00000044827
GO:0043325	phosphatidylinositol-3,4-bisphosphate binding	4/216	30/22627	0.133333	13.9673	6.97725	0.00018216	0.00393813	0.0032871	ENSMUSG00000015950/ENSMUSG00000020437/ENSMUSG00000024451/ENSMUSG00000020120
GO:0071813	lipoprotein particle binding	4/216	31/22627	0.129032	13.5167	6.8463	0.000207591	0.00409766	0.00342026	ENSMUSG00000042286/ENSMUSG00000023992/ENSMUSG00000025044/ENSMUSG00000036103
GO:0071814	protein-lipid complex binding	4/216	31/22627	0.129032	13.5167	6.8463	0.000207591	0.00409766	0.00342026	ENSMUSG00000042286/ENSMUSG00000023992/ENSMUSG00000025044/ENSMUSG00000036103
GO:0004875	complement receptor activity	3/216	14/22627	0.214286	22.4474	7.88062	0.000288939	0.00546577	0.0045622	ENSMUSG00000049130/ENSMUSG00000040552/ENSMUSG00000042190
GO:0001968	fibronectin binding	4/216	37/22627	0.108108	11.3248	6.17057	0.000416656	0.00756647	0.00631563	ENSMUSG00000112148/ENSMUSG00000038642/ENSMUSG00000112023/ENSMUSG00000017737
GO:0050664	oxidoreductase activity, acting on NAD(P)H, oxygen as acceptor	3/216	16/22627	0.1875	19.6415	7.32286	0.000438299	0.00765337	0.00638816	ENSMUSG00000015950/ENSMUSG00000015340/ENSMUSG00000026480
GO:0050840	extracellular matrix binding	5/216	68/22627	0.0735294	7.70255	5.43419	0.000484075	0.00813963	0.00679404	ENSMUSG00000038642/ENSMUSG00000035493/ENSMUSG00000029304/ENSMUSG00000005397/ENSMUSG00000064080
GO:0030246	carbohydrate binding	10/216	291/22627	0.0343643	3.59982	4.38214	0.00051215	0.00830415	0.00693135	ENSMUSG00000026712/ENSMUSG00000027322/ENSMUSG00000004609/ENSMUSG00000027435/ENSMUSG00000025877/ENSMUSG00000030144/ENSMUSG00000029915/ENSMUSG00000049037/ENSMUSG00000030474/ENSMUSG00000036103
GO:0051219	phosphoprotein binding	6/216	112/22627	0.0535714	5.61186	4.8034	0.000728743	0.0114086	0.0095226	ENSMUSG00000034116/ENSMUSG00000022372/ENSMUSG00000021457/ENSMUSG00000004837/ENSMUSG00000004266/ENSMUSG00000003283
GO:0004715	non-membrane spanning protein tyrosine kinase activity	4/216	44/22627	0.0909091	9.52315	5.55566	0.00081291	0.0119052	0.0099371	ENSMUSG00000031264/ENSMUSG00000021457/ENSMUSG00000053158/ENSMUSG00000003283
GO:0043394	proteoglycan binding	4/216	44/22627	0.0909091	9.52315	5.55566	0.00081291	0.0119052	0.0099371	ENSMUSG00000029816/ENSMUSG00000030786/ENSMUSG00000038642/ENSMUSG00000005397
GO:0034185	apolipoprotein binding	3/216	21/22627	0.142857	14.9649	6.28546	0.00100496	0.0142579	0.0119009	ENSMUSG00000112148/ENSMUSG00000023992/ENSMUSG00000112023
GO:0001846	opsonin binding	3/216	23/22627	0.130435	13.6636	5.96527	0.00131951	0.0177174	0.0147885	ENSMUSG00000027435/ENSMUSG00000030786/ENSMUSG00000000290
GO:0003779	actin binding	12/216	450/22627	0.0266667	2.79346	3.77264	0.00136208	0.0177174	0.0147885	ENSMUSG00000024300/ENSMUSG00000024397/ENSMUSG00000022831/ENSMUSG00000055805/ENSMUSG00000021998/ENSMUSG00000020437/ENSMUSG00000030707/ENSMUSG00000009687/ENSMUSG00000028337/ENSMUSG00000020681/ENSMUSG00000032643/ENSMUSG00000031636
GO:0051015	actin filament binding	8/216	222/22627	0.036036	3.77494	4.07904	0.00136588	0.0177174	0.0147885	ENSMUSG00000024300/ENSMUSG00000024397/ENSMUSG00000022831/ENSMUSG00000055805/ENSMUSG00000021998/ENSMUSG00000020437/ENSMUSG00000030707/ENSMUSG00000028337
GO:0005044	scavenger receptor activity	3/216	25/22627	0.12	12.5706	5.68265	0.00168975	0.0201881	0.0168507	ENSMUSG00000042286/ENSMUSG00000025044/ENSMUSG00000036103
GO:0016702	oxidoreductase activity, acting on single donors with incorporation of molecular oxygen, incorporation of two atoms of oxygen	3/216	25/22627	0.12	12.5706	5.68265	0.00168975	0.0201881	0.0168507	ENSMUSG00000060063/ENSMUSG00000047250/ENSMUSG00000025701
GO:0050431	transforming growth factor beta binding	3/216	25/22627	0.12	12.5706	5.68265	0.00168975	0.0201881	0.0168507	ENSMUSG00000052384/ENSMUSG00000000530/ENSMUSG00000090958
GO:0048029	monosaccharide binding	5/216	91/22627	0.0549451	5.75575	4.46274	0.00180962	0.0210659	0.0175834	ENSMUSG00000026712/ENSMUSG00000025877/ENSMUSG00000030144/ENSMUSG00000049037/ENSMUSG00000030474
GO:0016701	oxidoreductase activity, acting on single donors with incorporation of molecular oxygen	3/216	26/22627	0.115385	12.0871	5.55316	0.0018968	0.0215287	0.0179697	ENSMUSG00000060063/ENSMUSG00000047250/ENSMUSG00000025701
GO:0005125	cytokine activity	8/216	235/22627	0.0340426	3.56612	3.88207	0.00195314	0.0216275	0.0180522	ENSMUSG00000002603/ENSMUSG00000019122/ENSMUSG00000003206/ENSMUSG00000029304/ENSMUSG00000018927/ENSMUSG00000001741/ENSMUSG00000032436/ENSMUSG00000034708
GO:0033218	amide binding	8/216	236/22627	0.0338983	3.551	3.8675	0.00200546	0.0216781	0.0180944	ENSMUSG00000026390/ENSMUSG00000058818/ENSMUSG00000023992/ENSMUSG00000025044/ENSMUSG00000026656/ENSMUSG00000000290/ENSMUSG00000042190/ENSMUSG00000044827
GO:0004896	cytokine receptor activity	5/216	98/22627	0.0510204	5.34462	4.2315	0.00250463	0.0264442	0.0220726	ENSMUSG00000052336/ENSMUSG00000071713/ENSMUSG00000003206/ENSMUSG00000071714/ENSMUSG00000030745
GO:0035091	phosphatidylinositol binding	9/216	302/22627	0.0298013	3.12183	3.64433	0.00257104	0.0265284	0.0221429	ENSMUSG00000031264/ENSMUSG00000015950/ENSMUSG00000053158/ENSMUSG00000042644/ENSMUSG00000020437/ENSMUSG00000024451/ENSMUSG00000002668/ENSMUSG00000024013/ENSMUSG00000031662
GO:0019955	cytokine binding	6/216	146/22627	0.0410959	4.30498	3.93313	0.00282811	0.0284249	0.0237258	ENSMUSG00000052336/ENSMUSG00000024621/ENSMUSG00000003206/ENSMUSG00000052384/ENSMUSG00000000530/ENSMUSG00000090958
GO:0043274	phospholipase binding	3/216	30/22627	0.1	10.4755	5.09842	0.00288005	0.0284249	0.0237258	ENSMUSG00000031264/ENSMUSG00000061132/ENSMUSG00000021457
GO:0005537	D-mannose binding	3/216	33/22627	0.0909091	9.52315	4.81017	0.00378994	0.0359593	0.0300147	ENSMUSG00000026712/ENSMUSG00000030144/ENSMUSG00000049037
GO:0004726	non-membrane spanning protein tyrosine phosphatase activity	2/216	10/22627	0.2	20.9509	6.19506	0.00388107	0.0359593	0.0300147	ENSMUSG00000026126/ENSMUSG00000004266
GO:0030292	protein tyrosine kinase inhibitor activity	2/216	10/22627	0.2	20.9509	6.19506	0.00388107	0.0359593	0.0300147	ENSMUSG00000112148/ENSMUSG00000112023
GO:0016504	peptidase activator activity	4/216	71/22627	0.056338	5.90167	4.06109	0.00476366	0.043254	0.0361035	ENSMUSG00000038642/ENSMUSG00000002603/ENSMUSG00000037860/ENSMUSG00000030560
GO:0005518	collagen binding	4/216	73/22627	0.0547945	5.73998	3.98223	0.00525816	0.0468079	0.0390699	ENSMUSG00000038642/ENSMUSG00000035493/ENSMUSG00000005397/ENSMUSG00000024529
GO:0019207	kinase regulator activity	8/216	279/22627	0.0286738	3.00372	3.30613	0.00551881	0.0481509	0.0401908	ENSMUSG00000112148/ENSMUSG00000023992/ENSMUSG00000022488/ENSMUSG00000112023/ENSMUSG00000002603/ENSMUSG00000048583/ENSMUSG00000033220/ENSMUSG00000019876
GO:0140031	phosphorylation-dependent protein binding	2/216	12/22627	0.166667	17.4591	5.59885	0.00562113	0.0481509	0.0401908	ENSMUSG00000034116/ENSMUSG00000004266

## Sheet: cellular_component
GOID	Description	GeneRatio	BgRatio	RichFactor	FoldEnrichment	zScore	pvalue	p.adjust	qvalue	geneID
GO:0045335	phagocytic vesicle	13/223	128/23095	0.101562	10.5183	10.6626	3.55641e-10	7.75298e-08	6.2518e-08	ENSMUSG00000026177/ENSMUSG00000044583/ENSMUSG00000038642/ENSMUSG00000052160/ENSMUSG00000015340/ENSMUSG00000055805/ENSMUSG00000021457/ENSMUSG00000064267/ENSMUSG00000030707/ENSMUSG00000046805/ENSMUSG00000039853/ENSMUSG00000025473/ENSMUSG00000044827
GO:0001891	phagocytic cup	6/223	30/23095	0.2	20.713	10.6681	3.70675e-07	2.8044e-05	2.26139e-05	ENSMUSG00000024397/ENSMUSG00000098112/ENSMUSG00000030047/ENSMUSG00000021998/ENSMUSG00000020437/ENSMUSG00000030707
GO:0030139	endocytic vesicle	13/223	229/23095	0.0567686	5.87924	7.32697	3.85926e-07	2.8044e-05	2.26139e-05	ENSMUSG00000026177/ENSMUSG00000044583/ENSMUSG00000038642/ENSMUSG00000052160/ENSMUSG00000015340/ENSMUSG00000055805/ENSMUSG00000021457/ENSMUSG00000064267/ENSMUSG00000030707/ENSMUSG00000046805/ENSMUSG00000039853/ENSMUSG00000025473/ENSMUSG00000044827
GO:0098802	plasma membrane signaling receptor complex	11/223	192/23095	0.0572917	5.93341	6.778	2.8195e-06	0.000126512	0.000102016	ENSMUSG00000030786/ENSMUSG00000071713/ENSMUSG00000000290/ENSMUSG00000021457/ENSMUSG00000071714/ENSMUSG00000076617/ENSMUSG00000030830/ENSMUSG00000000530/ENSMUSG00000004266/ENSMUSG00000044827/ENSMUSG00000031425
GO:0043235	receptor complex	16/223	413/23095	0.0387409	4.0122	6.09914	2.90165e-06	0.000126512	0.000102016	ENSMUSG00000030786/ENSMUSG00000063234/ENSMUSG00000024621/ENSMUSG00000044583/ENSMUSG00000071713/ENSMUSG00000000290/ENSMUSG00000021457/ENSMUSG00000003206/ENSMUSG00000071714/ENSMUSG00000042644/ENSMUSG00000076617/ENSMUSG00000030830/ENSMUSG00000000530/ENSMUSG00000004266/ENSMUSG00000044827/ENSMUSG00000031425
GO:0005884	actin filament	9/223	134/23095	0.0671642	6.95586	6.82734	6.37291e-06	0.000231549	0.000186715	ENSMUSG00000024300/ENSMUSG00000024397/ENSMUSG00000022831/ENSMUSG00000033220/ENSMUSG00000021998/ENSMUSG00000026288/ENSMUSG00000030707/ENSMUSG00000003283/ENSMUSG00000031636
GO:0098636	protein complex involved in cell adhesion	6/223	59/23095	0.101695	10.532	7.23866	2.22742e-05	0.000693681	0.000559366	ENSMUSG00000030786/ENSMUSG00000000290/ENSMUSG00000030830/ENSMUSG00000021822/ENSMUSG00000005397/ENSMUSG00000031425
GO:0045121	membrane raft	13/223	344/23095	0.0377907	3.91379	5.37635	3.25448e-05	0.000836897	0.000674851	ENSMUSG00000030786/ENSMUSG00000058715/ENSMUSG00000031264/ENSMUSG00000023992/ENSMUSG00000015355/ENSMUSG00000002699/ENSMUSG00000000290/ENSMUSG00000026288/ENSMUSG00000040751/ENSMUSG00000029299/ENSMUSG00000003283/ENSMUSG00000039316/ENSMUSG00000044827
GO:0098857	membrane microdomain	13/223	346/23095	0.0375723	3.89117	5.35033	3.45508e-05	0.000836897	0.000674851	ENSMUSG00000030786/ENSMUSG00000058715/ENSMUSG00000031264/ENSMUSG00000023992/ENSMUSG00000015355/ENSMUSG00000002699/ENSMUSG00000000290/ENSMUSG00000026288/ENSMUSG00000040751/ENSMUSG00000029299/ENSMUSG00000003283/ENSMUSG00000039316/ENSMUSG00000044827
GO:0001772	immunological synapse	5/223	49/23095	0.102041	10.5679	6.62011	0.000108277	0.00236044	0.00190339	ENSMUSG00000040747/ENSMUSG00000030798/ENSMUSG00000020399/ENSMUSG00000030707/ENSMUSG00000030830
GO:0005581	collagen trimer	6/223	83/23095	0.0722892	7.48663	5.84562	0.000153941	0.00305082	0.0024601	ENSMUSG00000026390/ENSMUSG00000036887/ENSMUSG00000025044/ENSMUSG00000022371/ENSMUSG00000036103/ENSMUSG00000024529
GO:0031256	leading edge membrane	9/223	205/23095	0.0439024	4.54676	5.03658	0.000178679	0.00307263	0.00247769	ENSMUSG00000100254/ENSMUSG00000035697/ENSMUSG00000024397/ENSMUSG00000026979/ENSMUSG00000021998/ENSMUSG00000020437/ENSMUSG00000020120/ENSMUSG00000052085/ENSMUSG00000024013
GO:0043020	NADPH oxidase complex	3/223	12/23095	0.25	25.8913	8.51611	0.00018323	0.00307263	0.00247769	ENSMUSG00000015950/ENSMUSG00000015340/ENSMUSG00000026480
GO:0098562	cytoplasmic side of membrane	9/223	215/23095	0.0418605	4.33528	4.85147	0.000254642	0.0037866	0.00305342	ENSMUSG00000052142/ENSMUSG00000015950/ENSMUSG00000053158/ENSMUSG00000042644/ENSMUSG00000031506/ENSMUSG00000056069/ENSMUSG00000034792/ENSMUSG00000001128/ENSMUSG00000003283
GO:0030670	phagocytic vesicle membrane	5/223	59/23095	0.0847458	8.7767	5.90565	0.000262884	0.0037866	0.00305342	ENSMUSG00000026177/ENSMUSG00000064267/ENSMUSG00000030707/ENSMUSG00000046805/ENSMUSG00000044827
GO:0008305	integrin complex	4/223	33/23095	0.121212	12.5533	6.55792	0.000277916	0.0037866	0.00305342	ENSMUSG00000030786/ENSMUSG00000000290/ENSMUSG00000030830/ENSMUSG00000031425
GO:0062023	collagen-containing extracellular matrix	12/223	389/23095	0.0308483	3.19481	4.31073	0.000426774	0.00547274	0.00441308	ENSMUSG00000002603/ENSMUSG00000048583/ENSMUSG00000022371/ENSMUSG00000017737/ENSMUSG00000035493/ENSMUSG00000030560/ENSMUSG00000006403/ENSMUSG00000005397/ENSMUSG00000036103/ENSMUSG00000001741/ENSMUSG00000024529/ENSMUSG00000064080
GO:0032587	ruffle membrane	6/223	102/23095	0.0588235	6.09206	5.08916	0.000471854	0.00571467	0.00460816	ENSMUSG00000035697/ENSMUSG00000024397/ENSMUSG00000026979/ENSMUSG00000021998/ENSMUSG00000020120/ENSMUSG00000024013
GO:0031252	cell leading edge	13/223	482/23095	0.026971	2.79325	3.92857	0.00087166	0.0100012	0.00806467	ENSMUSG00000100254/ENSMUSG00000035697/ENSMUSG00000024397/ENSMUSG00000026979/ENSMUSG00000033220/ENSMUSG00000021998/ENSMUSG00000020437/ENSMUSG00000030707/ENSMUSG00000018507/ENSMUSG00000024451/ENSMUSG00000020120/ENSMUSG00000052085/ENSMUSG00000024013
GO:0002102	podosome	4/223	48/23095	0.0833333	8.63042	5.22531	0.00118028	0.0124323	0.0100251	ENSMUSG00000024965/ENSMUSG00000098112/ENSMUSG00000021998/ENSMUSG00000025473
GO:0030666	endocytic vesicle membrane	5/223	82/23095	0.0609756	6.31494	4.76068	0.00119761	0.0124323	0.0100251	ENSMUSG00000026177/ENSMUSG00000064267/ENSMUSG00000030707/ENSMUSG00000046805/ENSMUSG00000044827
GO:0031253	cell projection membrane	11/223	396/23095	0.0277778	2.87681	3.71975	0.0017072	0.0169168	0.0136413	ENSMUSG00000100254/ENSMUSG00000035697/ENSMUSG00000039062/ENSMUSG00000024397/ENSMUSG00000026979/ENSMUSG00000021998/ENSMUSG00000020120/ENSMUSG00000052085/ENSMUSG00000024013/ENSMUSG00000029299/ENSMUSG00000020681
GO:0001726	ruffle	7/223	195/23095	0.0358974	3.71772	3.76317	0.00294245	0.0278893	0.0224892	ENSMUSG00000035697/ENSMUSG00000024397/ENSMUSG00000026979/ENSMUSG00000021998/ENSMUSG00000024451/ENSMUSG00000020120/ENSMUSG00000024013
GO:0032127	dense core granule membrane	2/223	10/23095	0.2	20.713	6.15656	0.00396895	0.0360513	0.0290709	ENSMUSG00000024261/ENSMUSG00000025473
GO:0098858	actin-based cell projection	8/223	273/23095	0.029304	3.03487	3.33958	0.0052011	0.0453536	0.0365719	ENSMUSG00000100254/ENSMUSG00000069516/ENSMUSG00000024300/ENSMUSG00000002603/ENSMUSG00000021998/ENSMUSG00000020437/ENSMUSG00000030707/ENSMUSG00000002257
GO:0030027	lamellipodium	7/223	219/23095	0.0319635	3.3103	3.39195	0.00553508	0.0464095	0.0374234	ENSMUSG00000024397/ENSMUSG00000033220/ENSMUSG00000020437/ENSMUSG00000030707/ENSMUSG00000018507/ENSMUSG00000024451/ENSMUSG00000052085
