# Supplementary material for: Ependymal Dysfunction Links Ventricular Enlargement to Neuroinflammation: Implications for Hydrocephalus and Neurodegeneration
Source: Research Square preprint supplement (doi:10.21203/rs.3.rs-7569057/v1), 2025-09-23
Supplement: Supplementary file 2 [file b58a8bec18315213da41df54.xlsx]

## Sheet: Ependyma-wt_vs_Ependyma-null
gene_id	logFC	logCPM	LR	PValue	FDR	Ependyma-wt-rep1_RAW	Ependyma-wt-rep2_RAW	Ependyma-null-rep1_RAW	Ependyma-null-rep2_RAW	Ependyma-wt-rep1_CPM	Ependyma-wt-rep2_CPM	Ependyma-null-rep1_CPM	Ependyma-null-rep2_CPM	Ependyma-wt_CPM	Ependyma-null_CPM	Gene name	Gene description	GO	GO biological process	GO molecular function	GO cellular component
ENSMUSG00000030653	9.29307	0.804469	49.9344	1.58977e-12	2.88114e-08	0	0	91.59	63	0	0	3.51523	3.13934	0	3.33239	Gm45837	predicted gene 45837 [Source:MGI Symbol;Acc:MGI:5804952]	GO:0005515(protein binding); GO:0007165(signal transduction); GO:0004114(3',5'-cyclic-nucleotide phosphodiesterase activity); GO:0008081(phosphoric diester hydrolase activity); GO:0046872(metal ion binding); GO:0016787(hydrolase activity)	signal transduction	protein binding; 3',5'-cyclic-nucleotide phosphodiesterase activity; phosphoric diester hydrolase activity; metal ion binding; hydrolase activity
ENSMUSG00000026712	8.40541	4.38578	13.8291	0.000200209	0.403154	5	1	2147	10	0.179736	0.0496664	82.402	0.498308	0.123806	41.5606	Mrc1	mannose receptor, C type 1 [Source:MGI Symbol;Acc:MGI:97142]	GO:0071222(cellular response to lipopolysaccharide); GO:0071346(cellular response to type II interferon); GO:0071353(cellular response to interleukin-4); GO:0005886(plasma membrane); GO:0005768(endosome); GO:0005515(protein binding); GO:0006898(receptor-mediated endocytosis); GO:0030246(carbohydrate binding); GO:0009986(cell surface); GO:0006897(endocytosis); GO:0010008(endosome membrane); GO:003…	cellular response to lipopolysaccharide; cellular response to type II interferon; cellular response to interleukin-4; receptor-mediated endocytosis; endocytosis	protein binding; carbohydrate binding; signaling receptor activity; mannose binding; transmembrane signaling receptor activity; cargo receptor activity	plasma membrane; endosome; cell surface; endosome membrane
ENSMUSG00000142830	-7.69467	-0.649193	31.0731	2.48488e-08	0.000225168	33.83	19.5	0	0	1.21609	0.968494	0	0	1.10097	0		novel transcript
ENSMUSG00000042286	7.37031	6.58691	12.7577	0.000354545	0.584129	54	7	9845	78	1.94115	0.347665	377.852	3.8868	1.19763	190.981	Stab1	stabilin 1 [Source:MGI Symbol;Acc:MGI:2178742]	GO:0005509(calcium ion binding); GO:0005540(hyaluronic acid binding); GO:0007155(cell adhesion); GO:0016020(membrane); GO:0016192(vesicle-mediated transport); GO:0005041(low-density lipoprotein particle receptor activity); GO:0005044(scavenger receptor activity); GO:0030169(low-density lipoprotein particle binding); GO:0007267(cell-cell signaling); GO:0016525(negative regulation of angiogenesis);…	cell adhesion; vesicle-mediated transport; cell-cell signaling; negative regulation of angiogenesis; defense response to bacterium	calcium ion binding; hyaluronic acid binding; low-density lipoprotein particle receptor activity; scavenger receptor activity; low-density lipoprotein particle binding	membrane; plasma membrane
ENSMUSG00000116988	-7.05341	-1.19381	24.1912	8.7229e-07	0.0052695	18.11	15.19	0	0	0.651003	0.754432	0	0	0.698153	0	Gm49673	predicted gene, 49673 [Source:MGI Symbol;Acc:MGI:6215117]	GO:0016020(membrane); GO:0005783(endoplasmic reticulum); GO:0003723(RNA binding); GO:0005739(mitochondrion); GO:0005576(extracellular region); GO:0005764(lysosome); GO:0045087(innate immune response); GO:0016829(lyase activity); GO:0004519(endonuclease activity); GO:0005788(endoplasmic reticulum lumen); GO:0005758(mitochondrial intermembrane space); GO:0043202(lysosomal lumen); GO:0033897(ribonuc…	innate immune response; RNA catabolic process	RNA binding; lyase activity; endonuclease activity; ribonuclease T2 activity; RNA endonuclease activity	membrane; endoplasmic reticulum; mitochondrion; extracellular region; lysosome; endoplasmic reticulum lumen; mitochondrial intermembrane space; lysosomal lumen
ENSMUSG00000100254	-6.8432	-1.3668	21.1872	4.16547e-06	0.0188727	13.38	14.89	0	0	0.480973	0.739532	0	0	0.598056	0	Trpc2	transient receptor potential cation channel, subfamily C, member 2 [Source:MGI Symbol;Acc:MGI:109527]	GO:0016020(membrane); GO:0055085(transmembrane transport); GO:0006811(monoatomic ion transport); GO:0005262(calcium channel activity); GO:0070588(calcium ion transmembrane transport); GO:0005216(monoatomic ion channel activity); GO:0005515(protein binding); GO:0010468(regulation of gene expression); GO:0005634(nucleus); GO:0005886(plasma membrane); GO:0019236(response to pheromone); GO:0007204(po…	transmembrane transport; monoatomic ion transport; calcium ion transmembrane transport; regulation of gene expression; response to pheromone; positive regulation of cytosolic calcium ion concentration; calcium ion transport; regulation of cytosolic calcium ion concentration; negative regulation of male mating behavior; single strand break repair; single fertilization; inter-male aggressive behavi…	calcium channel activity; monoatomic ion channel activity; protein binding; damaged DNA binding; inositol 1,4,5 trisphosphate binding; store-operated calcium channel activity; diacylglycerol binding	membrane; nucleus; plasma membrane; dendrite membrane; endomembrane system; cation channel complex
ENSMUSG00000027322	6.70217	5.05007	10.9013	0.000960978	0.87079	33	1	3321	67	1.18626	0.0496664	127.46	3.33866	0.669079	65.5065	Siglec1	sialic acid binding Ig-like lectin 1, sialoadhesin [Source:MGI Symbol;Acc:MGI:99668]	GO:0016020(membrane); GO:0032480(negative regulation of type I interferon production); GO:0005886(plasma membrane)	negative regulation of type I interferon production		membrane; plasma membrane
ENSMUSG00000029816	6.14015	7.11367	14.2387	0.000161025	0.364782	176	28	13697	403	6.3267	1.39066	525.692	20.0818	3.92943	272.992	Gpnmb	glycoprotein (transmembrane) nmb [Source:MGI Symbol;Acc:MGI:1934765]	GO:0005886(plasma membrane); GO:0005768(endosome); GO:0007155(cell adhesion); GO:0031901(early endosome membrane); GO:0033162(melanosome membrane); GO:0008201(heparin binding); GO:0031410(cytoplasmic vesicle); GO:0005178(integrin binding); GO:0001934(positive regulation of protein phosphorylation); GO:0032720(negative regulation of tumor necrosis factor production); GO:0070374(positive regulation…	cell adhesion; positive regulation of protein phosphorylation; negative regulation of tumor necrosis factor production; positive regulation of ERK1 and ERK2 cascade; osteoblast differentiation; negative regulation of cytokine production; signal transduction; cell-cell signaling; bone mineralization; positive regulation of cell migration; positive regulation of protein autophosphorylation; regulat…	heparin binding; integrin binding; syndecan binding; receptor ligand activity	plasma membrane; endosome; early endosome membrane; melanosome membrane; cytoplasmic vesicle; membrane
ENSMUSG00000062515	5.78849	-0.306379	17.2685	3.2452e-05	0.0980211	1	0	60	10	0.0359472	0	2.3028	0.498308	0.0207855	1.44495	Fabp4	fatty acid binding protein 4, adipocyte [Source:MGI Symbol;Acc:MGI:88038]	GO:0008289(lipid binding); GO:0009617(response to bacterium); GO:0008284(positive regulation of cell population proliferation); GO:0042632(cholesterol homeostasis); GO:0071356(cellular response to tumor necrosis factor); GO:0050873(brown fat cell differentiation); GO:0005634(nucleus); GO:0005737(cytoplasm); GO:0005829(cytosol); GO:0045892(negative regulation of DNA-templated transcription); GO:00…	response to bacterium; positive regulation of cell population proliferation; cholesterol homeostasis; cellular response to tumor necrosis factor; brown fat cell differentiation; negative regulation of DNA-templated transcription; fatty acid metabolic process; positive regulation of cold-induced thermogenesis; white fat cell differentiation; positive regulation of inflammatory response; cellular r…	lipid binding; long-chain fatty acid transmembrane transporter activity; fatty acid binding; long-chain fatty acid binding; hormone receptor binding	nucleus; cytoplasm; cytosol; nucleoplasm
ENSMUSG00000004609	5.72761	3.25981	6.50344	0.0107666	0.999996	19	0	951	13	0.682996	0	36.4994	0.6478	0.379417	18.6786	Cd33	CD33 molecule [Source:MGI Symbol;Acc:MGI:99440]	GO:0005886(plasma membrane); GO:0009897(external side of plasma membrane); GO:0007155(cell adhesion); GO:0030246(carbohydrate binding); GO:0033691(sialic acid binding); GO:0016020(membrane)	cell adhesion	carbohydrate binding; sialic acid binding	plasma membrane; external side of plasma membrane; membrane
ENSMUSG00000020865	5.72072	2.62598	8.64266	0.00328381	0.999996	12	0	590	23	0.431366	0	22.6442	1.14611	0.242614	11.9908	Abcc3	ATP-binding cassette, sub-family C member 3 [Source:MGI Symbol;Acc:MGI:1923658]	GO:0005524(ATP binding); GO:0016020(membrane); GO:0022857(transmembrane transporter activity); GO:0055085(transmembrane transport); GO:0016887(ATP hydrolysis activity); GO:0140359(ABC-type transporter activity); GO:0005886(plasma membrane); GO:0016323(basolateral plasma membrane); GO:0006869(lipid transport); GO:0015431(ABC-type glutathione S-conjugate transporter activity); GO:0008559(ABC-type x…	transmembrane transport; lipid transport; canalicular bile acid transport; xenobiotic transmembrane transport; bile acid and bile salt transport; glucuronoside transport; xenobiotic transport; leukotriene transport; monoatomic anion transmembrane transport	ATP binding; transmembrane transporter activity; ATP hydrolysis activity; ABC-type transporter activity; ABC-type glutathione S-conjugate transporter activity; ABC-type xenobiotic transporter activity; ATPase-coupled transmembrane transporter activity; glucuronoside transmembrane transporter activity; ABC-type bile acid transporter activity; xenobiotic transmembrane transporter activity; icosanoi…	membrane; plasma membrane; basolateral plasma membrane; basal plasma membrane
ENSMUSG00000004707	5.71875	1.90289	8.56583	0.00342531	0.999996	7	0	358	10	0.25163	0	13.7401	0.498308	0.143089	7.21284	Ly9	lymphocyte antigen 9 [Source:MGI Symbol;Acc:MGI:96885]	GO:0002250(adaptive immune response); GO:0009897(external side of plasma membrane); GO:0005886(plasma membrane); GO:0007155(cell adhesion); GO:0045087(innate immune response); GO:0009986(cell surface); GO:0042110(T cell activation); GO:0032740(positive regulation of interleukin-17 production); GO:0072540(T-helper 17 cell lineage commitment); GO:0016020(membrane)	adaptive immune response; cell adhesion; innate immune response; T cell activation; positive regulation of interleukin-17 production; T-helper 17 cell lineage commitment		external side of plasma membrane; plasma membrane; cell surface; membrane
ENSMUSG00000069516	5.71075	9.59974	10.3705	0.00128045	0.966897	1439.99	127.99	77199	1648	51.7636	6.3568	2962.9	82.1211	29.1639	1522.62	Lyz2	lysozyme 2 [Source:MGI Symbol;Acc:MGI:96897]	GO:0003796(lysozyme activity); GO:0016798(hydrolase activity, acting on glycosyl bonds); GO:0031640(killing of cells of another organism); GO:0042742(defense response to bacterium); GO:0005576(extracellular region); GO:0030141(secretory granule); GO:0005902(microvillus); GO:0050829(defense response to Gram-negative bacterium); GO:0050830(defense response to Gram-positive bacterium); GO:0005795(Go…	killing of cells of another organism; defense response to bacterium; defense response to Gram-negative bacterium; defense response to Gram-positive bacterium	lysozyme activity; hydrolase activity, acting on glycosyl bonds	extracellular region; secretory granule; microvillus; Golgi stack; Golgi cis cisterna; endoplasmic reticulum lumen; trans-Golgi network transport vesicle; rough endoplasmic reticulum lumen
ENSMUSG00000027435	5.61219	3.57786	10.6408	0.00110618	0.954635	19	5	1183	19	0.682996	0.248332	45.4036	0.946785	0.487849	23.2805	Cd93	CD93 antigen [Source:MGI Symbol;Acc:MGI:106664]	GO:0005509(calcium ion binding); GO:0016020(membrane); GO:0007155(cell adhesion); GO:0005886(plasma membrane); GO:0030246(carbohydrate binding); GO:0009986(cell surface); GO:0031410(cytoplasmic vesicle); GO:0098609(cell-cell adhesion); GO:0001849(complement component C1q complex binding); GO:0038023(signaling receptor activity); GO:0001525(angiogenesis)	cell adhesion; cell-cell adhesion; angiogenesis	calcium ion binding; carbohydrate binding; complement component C1q complex binding; signaling receptor activity	membrane; plasma membrane; cell surface; cytoplasmic vesicle
ENSMUSG00000044811	5.55635	2.22118	8.10367	0.00441758	0.999996	10	0	444.88	15	0.359472	0	17.0745	0.747462	0.203017	9.00553	Cd300c2	CD300C molecule 2 [Source:MGI Symbol;Acc:MGI:2153249]	GO:0005515(protein binding); GO:0005886(plasma membrane); GO:0002376(immune system process); GO:0001819(positive regulation of cytokine production)	immune system process; positive regulation of cytokine production	protein binding	plasma membrane
ENSMUSG00000052336	5.53908	4.54733	5.93866	0.0148122	0.999996	54	0	2301	56	1.94115	0	88.3125	2.79052	1.04077	45.6567	Cx3cr1	C-X3-C motif chemokine receptor 1 [Source:MGI Symbol;Acc:MGI:1333815]	GO:0004930(G protein-coupled receptor activity); GO:0007186(G protein-coupled receptor signaling pathway); GO:0016020(membrane); GO:0007155(cell adhesion); GO:0006935(chemotaxis); GO:0016495(C-X3-C chemokine receptor activity); GO:0045766(positive regulation of angiogenesis); GO:0071356(cellular response to tumor necrosis factor); GO:0002931(response to ischemia); GO:0051897(positive regulation o…	G protein-coupled receptor signaling pathway; cell adhesion; chemotaxis; positive regulation of angiogenesis; cellular response to tumor necrosis factor; response to ischemia; positive regulation of phosphatidylinositol 3-kinase/protein kinase B signal transduction; microglial cell activation; immune response; adaptive immune response; cell-cell adhesion; inflammatory response; innate immune resp…	G protein-coupled receptor activity; C-X3-C chemokine receptor activity; C-C chemokine receptor activity; C-C chemokine binding; chemokine receptor activity; cytokine receptor activity; C-X3-C chemokine binding; CX3C chemokine receptor binding	membrane; external side of plasma membrane; plasma membrane; cell surface; perinuclear region of cytoplasm; neuronal cell body membrane; dendritic tree
ENSMUSG00000022126	5.48421	2.32319	9.5015	0.00205304	0.999996	10	1	483	12	0.359472	0.0496664	18.5376	0.59797	0.224239	9.66515	Acod1	aconitate decarboxylase 1 [Source:MGI Symbol;Acc:MGI:103206]	GO:0016829(lyase activity); GO:0042803(protein homodimerization activity); GO:0047613(aconitate decarboxylase activity); GO:0002760(positive regulation of antimicrobial humoral response); GO:0006952(defense response); GO:0071222(cellular response to lipopolysaccharide); GO:0072573(tolerance induction to lipopolysaccharide)	positive regulation of antimicrobial humoral response; defense response; cellular response to lipopolysaccharide; tolerance induction to lipopolysaccharide	lyase activity; protein homodimerization activity; aconitate decarboxylase activity
ENSMUSG00000026390	5.36314	5.26948	5.49875	0.01903	0.999996	101	0	3735	137	3.63067	0	143.35	6.82682	1.90551	75.1909	Marco	macrophage receptor with collagenous structure [Source:MGI Symbol;Acc:MGI:1309998]	GO:0016020(membrane); GO:0005737(cytoplasm); GO:0005615(extracellular space); GO:0005886(plasma membrane); GO:0005581(collagen trimer); GO:0045087(innate immune response); GO:0031012(extracellular matrix); GO:0006898(receptor-mediated endocytosis); GO:0001540(amyloid-beta binding); GO:0006897(endocytosis); GO:0097242(amyloid-beta clearance); GO:0001664(G protein-coupled receptor binding); GO:0038…	innate immune response; receptor-mediated endocytosis; endocytosis; amyloid-beta clearance; phagocytosis, engulfment; adenylate cyclase-inhibiting G protein-coupled receptor signaling pathway; positive regulation of ERK1 and ERK2 cascade; apoptotic cell clearance	amyloid-beta binding; G protein-coupled receptor binding; cargo receptor activity	membrane; cytoplasm; extracellular space; plasma membrane; collagen trimer; extracellular matrix
ENSMUSG00000024300	5.32991	3.80829	5.63638	0.0175915	0.999996	37	0	1379	26	1.33005	0	52.9261	1.2956	0.722806	27.2161	Myo1f	myosin IF [Source:MGI Symbol;Acc:MGI:107711]	GO:0005524(ATP binding); GO:0005515(protein binding); GO:0003774(cytoskeletal motor activity); GO:0016459(myosin complex); GO:0003779(actin binding); GO:0005829(cytosol)		ATP binding; protein binding; cytoskeletal motor activity; actin binding	myosin complex; cytosol
ENSMUSG00000024677	5.29906	2.10373	7.56358	0.00595597	0.999996	11	0	406	15	0.395419	0	15.5823	0.747462	0.222848	8.25781	Ms4a6b	membrane-spanning 4-domains, subfamily A, member 6B [Source:MGI Symbol;Acc:MGI:1917024]	GO:0016020(membrane); GO:0007166(cell surface receptor signaling pathway); GO:0005886(plasma membrane); GO:0005802(trans-Golgi network)	cell surface receptor signaling pathway		membrane; plasma membrane; trans-Golgi network
ENSMUSG00000034116	5.22315	2.84634	6.73362	0.00946123	0.999996	20	0	686	25	0.718944	0	26.3287	1.24577	0.398771	13.8845	Vav1	vav 1 oncogene [Source:MGI Symbol;Acc:MGI:98923]	GO:0005515(protein binding); GO:0005085(guanyl-nucleotide exchange factor activity); GO:0035556(intracellular signal transduction); GO:0046872(metal ion binding); GO:0007165(signal transduction); GO:0072593(reactive oxygen species metabolic process); GO:0005737(cytoplasm); GO:0005911(cell-cell junction); GO:0007186(G protein-coupled receptor signaling pathway); GO:0006909(phagocytosis); GO:000716…	intracellular signal transduction; signal transduction; reactive oxygen species metabolic process; G protein-coupled receptor signaling pathway; phagocytosis; cell surface receptor signaling pathway; cell migration; neutrophil chemotaxis; T cell differentiation; integrin-mediated signaling pathway; positive regulation of cell adhesion; positive regulation of natural killer cell mediated cytotoxic…	protein binding; guanyl-nucleotide exchange factor activity; metal ion binding; phosphorylation-dependent protein binding; phosphotyrosine residue binding	cytoplasm; cell-cell junction; cytosol
ENSMUSG00000035697	5.17576	3.27497	8.1327	0.00434739	0.999996	24	3	953	13	0.862732	0.148999	36.5762	0.6478	0.540911	18.717	Arhgap45	Rho GTPase activating protein 45 [Source:MGI Symbol;Acc:MGI:1917969]	GO:0007165(signal transduction); GO:0046872(metal ion binding); GO:0005829(cytosol); GO:0005886(plasma membrane); GO:0042995(cell projection); GO:0005737(cytoplasm); GO:0005096(GTPase activator activity); GO:0016020(membrane); GO:0032587(ruffle membrane)	signal transduction	metal ion binding; GTPase activator activity	cytosol; plasma membrane; cell projection; cytoplasm; membrane; ruffle membrane
ENSMUSG00000030786	5.14933	4.65537	4.99786	0.0253787	0.999996	76	0	2468.56	57	2.73199	0	94.7435	2.84036	1.44735	48.8976	Itgam	integrin alpha M [Source:MGI Symbol;Acc:MGI:96607]	GO:0007155(cell adhesion); GO:0008305(integrin complex); GO:0016020(membrane); GO:0046872(metal ion binding); GO:0007229(integrin-mediated signaling pathway); GO:0031072(heat shock protein binding); GO:0044877(protein-containing complex binding); GO:0002931(response to ischemia); GO:0007160(cell-matrix adhesion); GO:0009612(response to mechanical stimulus); GO:0010668(ectodermal cell differentiat…	cell adhesion; integrin-mediated signaling pathway; response to ischemia; cell-matrix adhesion; response to mechanical stimulus; ectodermal cell differentiation; response to estradiol; positive regulation of superoxide anion generation; heterotypic cell-cell adhesion; positive regulation of neutrophil degranulation; response to Gram-positive bacterium; response to curcumin	metal ion binding; heat shock protein binding; protein-containing complex binding	integrin complex; membrane; extracellular space; plasma membrane; cell surface; plasma membrane raft; integrin alphaM-beta2 complex
ENSMUSG00000048865	5.10866	2.8016	5.16304	0.0230724	0.999996	21	0	684	8	0.754891	0	26.252	0.398646	0.418084	13.4287	Arhgap30	Rho GTPase activating protein 30 [Source:MGI Symbol;Acc:MGI:2684948]	GO:0007165(signal transduction); GO:0043231(intracellular membrane-bounded organelle)	signal transduction		intracellular membrane-bounded organelle
ENSMUSG00000050370	5.1034	1.79533	8.70953	0.00316551	0.999996	10	0	312	22	0.359472	0	11.9746	1.09628	0.203017	6.61847	Ch25h	cholesterol 25-hydroxylase [Source:MGI Symbol;Acc:MGI:1333869]	GO:0016491(oxidoreductase activity); GO:0005506(iron ion binding); GO:0008610(lipid biosynthetic process); GO:0016020(membrane); GO:0046872(metal ion binding); GO:0005783(endoplasmic reticulum); GO:0005789(endoplasmic reticulum membrane); GO:0004497(monooxygenase activity); GO:0016126(sterol biosynthetic process); GO:0000254(C-4 methylsterol oxidase activity); GO:0008395(steroid hydroxylase activ…	lipid biosynthetic process; sterol biosynthetic process; response to type I interferon; cholesterol metabolic process; B cell chemotaxis; negative regulation of cholesterol metabolic process; negative regulation of fusion of virus membrane with host plasma membrane	oxidoreductase activity; iron ion binding; metal ion binding; monooxygenase activity; C-4 methylsterol oxidase activity; steroid hydroxylase activity; cholesterol 25-hydroxylase activity	membrane; endoplasmic reticulum; endoplasmic reticulum membrane
ENSMUSG00000058818	5.07092	2.6494	6.91053	0.00856897	0.999996	19.26	0	585.78	29.18	0.692343	0	22.4823	1.45406	0.384453	12.0612	Pirb	paired Ig-like receptor B [Source:MGI Symbol;Acc:MGI:894311]	GO:0005886(plasma membrane); GO:0002250(adaptive immune response); GO:0005515(protein binding); GO:0019221(cytokine-mediated signaling pathway); GO:0032396(inhibitory MHC class I receptor activity); GO:0002764(immune response-regulating signaling pathway); GO:0007166(cell surface receptor signaling pathway); GO:0007611(learning or memory); GO:0001782(B cell homeostasis); GO:0042803(protein homodi…	adaptive immune response; cytokine-mediated signaling pathway; immune response-regulating signaling pathway; cell surface receptor signaling pathway; learning or memory; B cell homeostasis; myeloid dendritic cell differentiation; B cell mediated immunity; negative regulation of protein metabolic process; positive regulation of protein dephosphorylation; regulation of long-term synaptic potentiati…	protein binding; inhibitory MHC class I receptor activity; protein homodimerization activity; amyloid-beta binding; protein-containing complex binding	plasma membrane
ENSMUSG00000112148	5.06036	3.68383	5.9964	0.0143351	0.999996	40.71	0	1218.07	54.53	1.46341	0	46.7496	2.71727	0.792591	24.8315	Lilrb4a	leukocyte immunoglobulin-like receptor, subfamily B, member 4A [Source:MGI Symbol;Acc:MGI:102701]	GO:0016020(membrane); GO:0071222(cellular response to lipopolysaccharide); GO:0009611(response to wounding); GO:0006954(inflammatory response); GO:0002437(inflammatory response to antigenic stimulus); GO:0032496(response to lipopolysaccharide); GO:0005886(plasma membrane); GO:0002250(adaptive immune response); GO:0009897(external side of plasma membrane); GO:0019221(cytokine-mediated signaling pa…	cellular response to lipopolysaccharide; response to wounding; inflammatory response; inflammatory response to antigenic stimulus; response to lipopolysaccharide; adaptive immune response; cytokine-mediated signaling pathway; immune response-regulating signaling pathway; neutrophil homeostasis; blood coagulation; negative regulation of natural killer cell activation; response to other organism; r…	inhibitory MHC class I receptor activity; protein phosphatase binding; phosphatase binding; fibronectin binding; integrin binding	membrane; plasma membrane; external side of plasma membrane; cell surface
ENSMUSG00000022548	-5.05009	4.00993	7.64629	0.00568891	0.999996	1713	9	20	22	61.5775	0.446997	0.767601	1.09628	31.1433	0.921506	Apod	apolipoprotein D [Source:MGI Symbol;Acc:MGI:88056]	GO:0008289(lipid binding); GO:0006869(lipid transport); GO:0042246(tissue regeneration); GO:0007420(brain development); GO:0005737(cytoplasm); GO:0006629(lipid metabolic process); GO:0005783(endoplasmic reticulum); GO:0005576(extracellular region); GO:0005615(extracellular space); GO:0030425(dendrite); GO:0043025(neuronal cell body); GO:0048471(perinuclear region of cytoplasm); GO:0006950(respons…	lipid transport; tissue regeneration; brain development; lipid metabolic process; response to stress; glucose metabolic process; negative regulation of focal adhesion assembly; response to reactive oxygen species; negative regulation of smooth muscle cell proliferation; negative regulation of monocyte chemotactic protein-1 production; negative regulation of cytokine production involved in inflamm…	lipid binding; cholesterol binding	cytoplasm; endoplasmic reticulum; extracellular region; extracellular space; dendrite; neuronal cell body; perinuclear region of cytoplasm; cytosolic ribosome
ENSMUSG00000110195	-5.0479	1.62019	15.8053	7.02066e-05	0.181765	231	65	8.46	0	8.3038	3.22831	0.324695	0	5.81822	0.179853	Pde2a	phosphodiesterase 2A, cGMP-stimulated [Source:MGI Symbol;Acc:MGI:2446107]	GO:0005515(protein binding); GO:0007165(signal transduction); GO:0004114(3',5'-cyclic-nucleotide phosphodiesterase activity); GO:0008081(phosphoric diester hydrolase activity); GO:0005739(mitochondrion); GO:0007507(heart development); GO:0005829(cytosol); GO:0005737(cytoplasm); GO:0030424(axon); GO:0005634(nucleus); GO:0005794(Golgi apparatus); GO:0046872(metal ion binding); GO:0005886(plasma mem…	signal transduction; heart development; intracellular signal transduction; negative regulation of transcription by RNA polymerase II; positive regulation of gene expression; cardiac septum development; aorta development; coronary vasculature development; ventricular septum development; cAMP-mediated signaling; regulation of cAMP-mediated signaling; regulation of mitochondrion organization; cGMP-m…	protein binding; 3',5'-cyclic-nucleotide phosphodiesterase activity; phosphoric diester hydrolase activity; metal ion binding; hydrolase activity; cAMP binding; 3',5'-cyclic-GMP phosphodiesterase activity; 3',5'-cyclic-AMP phosphodiesterase activity; identical protein binding; cGMP binding; protein homodimerization activity; cGMP-stimulated cyclic-nucleotide phosphodiesterase activity; GAF domain…	mitochondrion; cytosol; cytoplasm; axon; nucleus; Golgi apparatus; plasma membrane; endoplasmic reticulum; mitochondrial inner membrane; mitochondrial outer membrane; mitochondrial matrix; synaptic membrane; dendrite; perinuclear region of cytoplasm; hippocampal mossy fiber
ENSMUSG00000036887	5.04384	6.34339	4.06254	0.0438445	0.999996	265	0	7981	170	9.526	0	306.311	8.47123	4.87698	157.499	C1qa	complement component 1, q subcomponent, alpha polypeptide [Source:MGI Symbol;Acc:MGI:88223]	GO:0005515(protein binding); GO:0045202(synapse); GO:0005576(extracellular region); GO:0098978(glutamatergic synapse); GO:0005581(collagen trimer); GO:0045087(innate immune response); GO:0006958(complement activation, classical pathway); GO:0062167(complement component C1q complex); GO:0005615(extracellular space); GO:0098888(extrinsic component of presynaptic membrane); GO:0016322(neuron remodel…	innate immune response; complement activation, classical pathway; neuron remodeling; complement-mediated synapse pruning; vertebrate eye-specific patterning; microglial cell activation; astrocyte activation; synapse pruning; synapse organization	protein binding	synapse; extracellular region; glutamatergic synapse; collagen trimer; complement component C1q complex; extracellular space; extrinsic component of presynaptic membrane; extrinsic component of postsynaptic membrane; postsynapse; complement component C1 complex
ENSMUSG00000063234	5.03921	1.18383	11.1239	0.000852206	0.87079	4	2	207	9	0.143789	0.0993328	7.94467	0.448477	0.12467	4.27972	Gpr84	G protein-coupled receptor 84 [Source:MGI Symbol;Acc:MGI:1934129]	GO:0004930(G protein-coupled receptor activity); GO:0007186(G protein-coupled receptor signaling pathway); GO:0016020(membrane)	G protein-coupled receptor signaling pathway	G protein-coupled receptor activity	membrane
ENSMUSG00000040747	5.02999	4.48243	4.65091	0.031037	0.999996	73	0	2198	39	2.62414	0	84.3594	1.9434	1.39214	43.2583	Cd53	CD53 antigen [Source:MGI Symbol;Acc:MGI:88341]	GO:0016020(membrane); GO:0005886(plasma membrane); GO:0070161(anchoring junction); GO:0009986(cell surface); GO:0005911(cell-cell junction); GO:1901741(positive regulation of myoblast fusion); GO:0042802(identical protein binding); GO:0043495(protein-membrane adaptor activity); GO:0043113(receptor clustering); GO:0001772(immunological synapse)	positive regulation of myoblast fusion; receptor clustering	identical protein binding; protein-membrane adaptor activity	membrane; plasma membrane; anchoring junction; cell surface; cell-cell junction; immunological synapse
ENSMUSG00000024621	5.01288	5.76556	4.00675	0.0453184	0.999996	181	0	5390	75	6.50644	0	206.869	3.73731	3.3591	105.412	Csf1r	colony stimulating factor 1 receptor [Source:MGI Symbol;Acc:MGI:1339758]	GO:0005524(ATP binding); GO:0004672(protein kinase activity); GO:0006468(protein phosphorylation); GO:0007169(cell surface receptor protein tyrosine kinase signaling pathway); GO:0004714(transmembrane receptor protein tyrosine kinase activity); GO:0004713(protein tyrosine kinase activity); GO:0019955(cytokine binding); GO:0019221(cytokine-mediated signaling pathway); GO:0010628(positive regulatio…	protein phosphorylation; cell surface receptor protein tyrosine kinase signaling pathway; cytokine-mediated signaling pathway; positive regulation of gene expression; negative regulation of epithelial cell differentiation; microglial cell activation; regulation of cell shape; inflammatory response; innate immune response; animal organ development; positive regulation of tumor necrosis factor prod…	ATP binding; protein kinase activity; transmembrane receptor protein tyrosine kinase activity; protein tyrosine kinase activity; cytokine binding; protein binding; metal ion binding; protein phosphatase binding; organic cyclic compound binding; protein homodimerization activity; growth factor binding; macrophage colony-stimulating factor receptor activity	plasma membrane; membrane; cell surface; cell body; perikaryon; receptor complex; CSF1-CSF1R complex; nucleoplasm; intracellular membrane-bounded organelle
ENSMUSG00000024672	5.0075	3.86527	5.22498	0.0222647	0.999996	48	0	1412	38	1.72546	0	54.1927	1.89357	0.929034	28.1463	Ms4a7	membrane-spanning 4-domains, subfamily A, member 7 [Source:MGI Symbol;Acc:MGI:1918846]	GO:0016020(membrane); GO:0007166(cell surface receptor signaling pathway); GO:0005886(plasma membrane); GO:0005802(trans-Golgi network)	cell surface receptor signaling pathway		membrane; plasma membrane; trans-Golgi network
ENSMUSG00000058715	5.00748	4.64398	4.83141	0.0279457	0.999996	83	0	2431	65	2.98362	0	93.3019	3.239	1.57596	48.3752	Fcer1g	Fc receptor, IgE, high affinity I, gamma polypeptide [Source:MGI Symbol;Acc:MGI:95496]	GO:0016020(membrane); GO:0007166(cell surface receptor signaling pathway); GO:0004888(transmembrane signaling receptor activity); GO:0019767(IgE receptor activity); GO:0032998(Fc-epsilon receptor I complex); GO:0005515(protein binding); GO:0046872(metal ion binding); GO:0016064(immunoglobulin mediated immune response); GO:0009897(external side of plasma membrane); GO:0005886(plasma membrane); GO:…	cell surface receptor signaling pathway; immunoglobulin mediated immune response; innate immune response; regulation of immune response; positive regulation of phagocytosis; defense response to bacterium; integrin-mediated signaling pathway; Fc-epsilon receptor signaling pathway; antigen processing and presentation of exogenous peptide antigen via MHC class II; positive regulation of tumor necros…	transmembrane signaling receptor activity; IgE receptor activity; protein binding; metal ion binding; IgE binding; identical protein binding; protein heterodimerization activity; protein homodimerization activity; IgG binding	membrane; Fc-epsilon receptor I complex; external side of plasma membrane; plasma membrane; plasma membrane protein complex; cell surface; membrane raft; Fc-gamma receptor III complex
ENSMUSG00000038147	5.00632	4.3584	4.49082	0.0340772	0.999996	68	0	2025	28	2.44441	0	77.7196	1.39526	1.29997	39.6652	Cd84	CD84 antigen [Source:MGI Symbol;Acc:MGI:1336885]	GO:0016020(membrane); GO:0042802(identical protein binding); GO:0032685(negative regulation of granulocyte macrophage colony-stimulating factor production); GO:0032701(negative regulation of interleukin-18 production); GO:0033004(negative regulation of mast cell activation); GO:0043305(negative regulation of mast cell degranulation); GO:2001256(regulation of store-operated calcium entry); GO:0005…	negative regulation of granulocyte macrophage colony-stimulating factor production; negative regulation of interleukin-18 production; negative regulation of mast cell activation; negative regulation of mast cell degranulation; regulation of store-operated calcium entry	identical protein binding	membrane; plasma membrane; intracellular membrane-bounded organelle
ENSMUSG00000056966	-4.99848	2.57412	4.41443	0.0356361	0.999996	624	3	18	0	22.431	0.148999	0.690841	0	11.4146	0.376838	Gjc3	gap junction protein, gamma 3 [Source:MGI Symbol;Acc:MGI:2153041]	GO:0007154(cell communication); GO:0005922(connexin complex); GO:0007605(sensory perception of sound); GO:0042552(myelination); GO:0005886(plasma membrane); GO:0055085(transmembrane transport); GO:0005921(gap junction); GO:0042802(identical protein binding); GO:0043209(myelin sheath); GO:0007267(cell-cell signaling); GO:0005243(gap junction channel activity)	cell communication; sensory perception of sound; myelination; transmembrane transport; cell-cell signaling	identical protein binding; gap junction channel activity	connexin complex; plasma membrane; gap junction; myelin sheath
ENSMUSG00000002111	4.99678	3.19244	5.20085	0.0225758	0.999996	30	0	890	17	1.07842	0	34.1583	0.847123	0.590349	17.6058	Spi1	Spi-1 proto-oncogene [Source:MGI Symbol;Acc:MGI:98282]	GO:0006355(regulation of DNA-templated transcription); GO:0003700(DNA-binding transcription factor activity); GO:0043565(sequence-specific DNA binding); GO:0006357(regulation of transcription by RNA polymerase II); GO:0045892(negative regulation of DNA-templated transcription); GO:0045944(positive regulation of transcription by RNA polymerase II); GO:0005634(nucleus); GO:0000122(negative regulati…	regulation of DNA-templated transcription; regulation of transcription by RNA polymerase II; negative regulation of DNA-templated transcription; positive regulation of transcription by RNA polymerase II; negative regulation of transcription by RNA polymerase II; transcription initiation-coupled chromatin remodeling; positive regulation of miRNA transcription; positive regulation of B cell differe…	DNA-binding transcription factor activity; sequence-specific DNA binding; transcription cis-regulatory region binding; RNA polymerase II cis-regulatory region sequence-specific DNA binding; RNA polymerase II-specific DNA-binding transcription factor binding; DNA-binding transcription activator activity; cis-regulatory region sequence-specific DNA binding; DNA-binding transcription factor binding;…	nucleus; chromatin; nucleoplasm; transcription regulator complex
ENSMUSG00000028581	4.96334	5.87525	3.82201	0.0505835	0.999996	202	0	5826	69	7.26133	0	223.602	3.43832	3.73906	113.63	Laptm5	lysosomal-associated protein transmembrane 5 [Source:MGI Symbol;Acc:MGI:108046]	GO:0016020(membrane); GO:1990830(cellular response to leukemia inhibitory factor); GO:0005765(lysosomal membrane); GO:0005829(cytosol); GO:0005764(lysosome); GO:0005515(protein binding); GO:0032755(positive regulation of interleukin-6 production); GO:1903265(positive regulation of tumor necrosis factor-mediated signaling pathway); GO:0032703(negative regulation of interleukin-2 production); GO:00…	cellular response to leukemia inhibitory factor; positive regulation of interleukin-6 production; positive regulation of tumor necrosis factor-mediated signaling pathway; negative regulation of interleukin-2 production; positive regulation of MAPK cascade; positive regulation of proteolysis involved in protein catabolic process; positive regulation of cytokine production involved in immune respon…	protein binding; enzyme binding; protein sequestering activity; ubiquitin protein ligase binding	membrane; lysosomal membrane; cytosol; lysosome; plasma membrane; transport vesicle; cytoplasmic vesicle; perinuclear region of cytoplasm; protein-containing complex
ENSMUSG00000026177	4.93939	2.99149	6.00671	0.0142516	0.999996	27	0	751	31	0.970574	0	28.8234	1.54475	0.533207	15.2807	Slc11a1	solute carrier family 11 (proton-coupled divalent metal ion transporters), member 1 [Source:MGI Symbol;Acc:MGI:1345275]	GO:0016020(membrane); GO:0046873(metal ion transmembrane transporter activity); GO:0030001(metal ion transport); GO:0046915(transition metal ion transmembrane transporter activity); GO:0006826(iron ion transport); GO:0005765(lysosomal membrane); GO:0005768(endosome); GO:0031902(late endosome membrane); GO:0009617(response to bacterium); GO:0010628(positive regulation of gene expression); GO:00459…	metal ion transport; iron ion transport; response to bacterium; positive regulation of gene expression; positive regulation of transcription by RNA polymerase II; inflammatory response; positive regulation of type II interferon production; multicellular organismal-level iron ion homeostasis; macrophage activation; response to lipopolysaccharide; proton transmembrane transport; phagocytosis; estab…	metal ion transmembrane transporter activity; transition metal ion transmembrane transporter activity; iron ion transmembrane transporter activity; manganese ion transmembrane transporter activity; cadmium ion transmembrane transporter activity; protein homodimerization activity; metal cation:proton antiporter activity	membrane; lysosomal membrane; endosome; late endosome membrane; plasma membrane; lysosome; endosome membrane; late endosome; phagocytic vesicle membrane; tertiary granule membrane
ENSMUSG00000039062	4.93814	3.75493	7.24487	0.00711039	0.999996	41	4	1330	16	1.47383	0.198666	51.0455	0.797293	0.886446	26.0283	Anpep	alanyl aminopeptidase, membrane [Source:MGI Symbol;Acc:MGI:5000466]	GO:0008270(zinc ion binding); GO:0006508(proteolysis); GO:0008237(metallopeptidase activity); GO:0046872(metal ion binding); GO:0005886(plasma membrane); GO:0005615(extracellular space); GO:0009897(external side of plasma membrane); GO:0030154(cell differentiation); GO:0005737(cytoplasm); GO:0004177(aminopeptidase activity); GO:0001525(angiogenesis); GO:0016485(protein processing); GO:0042277(pep…	proteolysis; cell differentiation; angiogenesis; protein processing; peptide catabolic process	zinc ion binding; metallopeptidase activity; metal ion binding; aminopeptidase activity; peptide binding; metalloaminopeptidase activity	plasma membrane; extracellular space; external side of plasma membrane; cytoplasm; brush border membrane; endoplasmic reticulum-Golgi intermediate compartment; extracellular exosome
ENSMUSG00000030220	4.91611	3.93311	7.9424	0.00482897	0.999996	48	4	1489	31	1.72546	0.198666	57.1479	1.54475	1.01795	29.4513	Arhgdib	Rho, GDP dissociation inhibitor beta [Source:MGI Symbol;Acc:MGI:101940]	GO:0005515(protein binding); GO:0005094(Rho GDP-dissociation inhibitor activity); GO:0007266(Rho protein signal transduction); GO:0005737(cytoplasm); GO:0005829(cytosol); GO:0005096(GTPase activator activity); GO:0016020(membrane); GO:0031267(small GTPase binding); GO:0035023(regulation of Rho protein signal transduction); GO:0003924(GTPase activity); GO:1901164(negative regulation of trophoblast…	Rho protein signal transduction; regulation of Rho protein signal transduction; negative regulation of trophoblast cell migration	protein binding; Rho GDP-dissociation inhibitor activity; GTPase activator activity; small GTPase binding; GTPase activity	cytoplasm; cytosol; membrane
ENSMUSG00000036896	4.90213	6.58155	3.76927	0.0522024	0.999996	344	0	9387	200	12.3658	0	360.274	9.96616	6.30143	185.228	C1qc	complement component 1, q subcomponent, C chain [Source:MGI Symbol;Acc:MGI:88225]	GO:0005515(protein binding); GO:0045202(synapse); GO:0005576(extracellular region); GO:0098978(glutamatergic synapse); GO:0005581(collagen trimer); GO:0045087(innate immune response); GO:0006958(complement activation, classical pathway); GO:0005615(extracellular space); GO:0098888(extrinsic component of presynaptic membrane); GO:0098883(synapse pruning); GO:0098890(extrinsic component of postsyna…	innate immune response; complement activation, classical pathway; synapse pruning; negative regulation of granulocyte differentiation; negative regulation of macrophage differentiation	protein binding	synapse; extracellular region; glutamatergic synapse; collagen trimer; extracellular space; extrinsic component of presynaptic membrane; extrinsic component of postsynaptic membrane; postsynapse; complement component C1 complex; complement component C1q complex
ENSMUSG00000031264	4.87589	1.57945	7.36467	0.0066518	0.999996	10	0	272	14	0.359472	0	10.4394	0.697631	0.203017	5.65384	Btk	Bruton agammaglobulinemia tyrosine kinase [Source:MGI Symbol;Acc:MGI:88216]	GO:0005524(ATP binding); GO:0005515(protein binding); GO:0035556(intracellular signal transduction); GO:0004672(protein kinase activity); GO:0006468(protein phosphorylation); GO:0004713(protein tyrosine kinase activity); GO:0005634(nucleus); GO:0032693(negative regulation of interleukin-10 production); GO:0005737(cytoplasm); GO:0032496(response to lipopolysaccharide); GO:0046872(metal ion binding…	intracellular signal transduction; protein phosphorylation; negative regulation of interleukin-10 production; response to lipopolysaccharide; adaptive immune response; apoptotic process; innate immune response; positive regulation of B cell proliferation; positive regulation of phagocytosis; T cell receptor signaling pathway; positive regulation of tumor necrosis factor production; neutrophil hom…	ATP binding; protein binding; protein kinase activity; protein tyrosine kinase activity; metal ion binding; lipid binding; non-membrane spanning protein tyrosine kinase activity; phosphatidylinositol-3,4,5-trisphosphate binding; phospholipase activator activity; identical protein binding; phospholipase binding	nucleus; cytoplasm; plasma membrane; cytosol; membrane raft; perinuclear region of cytoplasm; cytoplasmic vesicle
ENSMUSG00000051506	4.85962	2.77747	7.30494	0.00687652	0.999996	19	4	670	7	0.682996	0.198666	25.7146	0.348816	0.46596	13.1353	Wdfy4	WD repeat and FYVE domain containing 4 [Source:MGI Symbol;Acc:MGI:3584510]	GO:0005515(protein binding); GO:0098586(cellular response to virus); GO:0005783(endoplasmic reticulum); GO:0005768(endosome); GO:0006914(autophagy); GO:0005769(early endosome); GO:0019882(antigen processing and presentation); GO:0036037(CD8-positive, alpha-beta T cell activation)	cellular response to virus; autophagy; antigen processing and presentation; CD8-positive, alpha-beta T cell activation	protein binding	endoplasmic reticulum; endosome; early endosome
ENSMUSG00000040522	4.84725	2.00012	6.06758	0.0137685	0.999996	14	0	376	12	0.503261	0	14.4309	0.59797	0.281963	7.60772	Tlr8	toll-like receptor 8 [Source:MGI Symbol;Acc:MGI:2176887]	GO:0005515(protein binding); GO:0007165(signal transduction); GO:0016020(membrane); GO:0005886(plasma membrane); GO:0003677(DNA binding); GO:0005768(endosome); GO:0051607(defense response to virus); GO:0006954(inflammatory response); GO:0045087(innate immune response); GO:0010008(endosome membrane); GO:0003725(double-stranded RNA binding); GO:0060255(regulation of macromolecule metabolic process)…	signal transduction; defense response to virus; inflammatory response; innate immune response; regulation of macromolecule metabolic process; regulation of protein phosphorylation; positive regulation of innate immune response; positive regulation of interferon-alpha production; positive regulation of interleukin-8 production; positive regulation of type II interferon production; positive regulat…	protein binding; DNA binding; double-stranded RNA binding; single-stranded RNA binding; pattern recognition receptor activity	membrane; plasma membrane; endosome; endosome membrane; external side of plasma membrane
ENSMUSG00000093938	4.82715	2.32274	5.50354	0.018978	0.999996	18	0	476.59	12	0.647049	0	18.2916	0.59797	0.360021	9.54194	Evi2b	ecotropic viral integration site 2b [Source:MGI Symbol;Acc:MGI:1890682]	GO:0016020(membrane); GO:0051726(regulation of cell cycle); GO:2000035(regulation of stem cell division); GO:0043066(negative regulation of apoptotic process); GO:0030854(positive regulation of granulocyte differentiation); GO:0045660(positive regulation of neutrophil differentiation); GO:0061515(myeloid cell development)	regulation of cell cycle; regulation of stem cell division; negative regulation of apoptotic process; positive regulation of granulocyte differentiation; positive regulation of neutrophil differentiation; myeloid cell development		membrane
ENSMUSG00000023992	4.80527	4.08859	6.09372	0.0135663	0.999996	63	1	1647	41	2.26467	0.0496664	63.212	2.04306	1.23	32.7317	Trem2	triggering receptor expressed on myeloid cells 2 [Source:MGI Symbol;Acc:MGI:1913150]	GO:0071456(cellular response to hypoxia); GO:0005515(protein binding); GO:0071333(cellular response to glucose stimulus); GO:0005886(plasma membrane); GO:0042742(defense response to bacterium); GO:0005576(extracellular region); GO:0010468(regulation of gene expression); GO:0008289(lipid binding); GO:0045088(regulation of innate immune response); GO:0030316(osteoclast differentiation); GO:0071526(…	cellular response to hypoxia; cellular response to glucose stimulus; defense response to bacterium; regulation of gene expression; regulation of innate immune response; osteoclast differentiation; semaphorin-plexin signaling pathway; positive regulation of ERK1 and ERK2 cascade; negative regulation of apoptotic process; positive regulation of gene expression; positive regulation of osteoclast dif…	protein binding; lipid binding; semaphorin receptor activity; phosphatidylserine binding; phospholipid binding; signaling receptor activity; transmembrane signaling receptor activity; lipopolysaccharide binding; semaphorin receptor binding; protein tyrosine kinase binding; kinase activator activity; peptidoglycan binding; lipoteichoic acid binding; sulfatide binding; amyloid-beta binding; beta-ca…	plasma membrane; extracellular region; membrane; plasma membrane raft
ENSMUSG00000035004	4.8001	1.50649	6.44883	0.0111025	0.999996	10	0	263	9	0.359472	0	10.094	0.448477	0.203017	5.35969	Igsf6	immunoglobulin superfamily, member 6 [Source:MGI Symbol;Acc:MGI:1891393]	GO:0016020(membrane)			membrane
ENSMUSG00000025877	4.7909	2.98626	7.14846	0.00750282	0.999996	27	2	766	15	0.970574	0.0993328	29.3991	0.747462	0.576664	15.1755	Hk3	hexokinase 3 [Source:MGI Symbol;Acc:MGI:2670962]	GO:0006096(glycolytic process); GO:0005524(ATP binding); GO:0005975(carbohydrate metabolic process); GO:0004396(hexokinase activity); GO:0005536(glucose binding); GO:0001678(intracellular glucose homeostasis); GO:0016773(phosphotransferase activity, alcohol group as acceptor); GO:0005739(mitochondrion); GO:0005829(cytosol); GO:0016301(kinase activity); GO:0032991(protein-containing complex); GO:0…	glycolytic process; carbohydrate metabolic process; intracellular glucose homeostasis; carbohydrate phosphorylation; hexose metabolic process; fructose 6-phosphate metabolic process; glucose metabolic process; glucose 6-phosphate metabolic process; negative regulation of hydrogen peroxide-mediated programmed cell death	ATP binding; hexokinase activity; glucose binding; phosphotransferase activity, alcohol group as acceptor; kinase activity; enzyme binding; hormone binding; glucokinase activity; fructokinase activity	mitochondrion; cytosol; protein-containing complex
ENSMUSG00000025044	4.78872	2.94731	5.54924	0.0184887	0.999996	29	0	728	28	1.04247	0	27.9407	1.39526	0.571329	14.7651	Msr1	macrophage scavenger receptor 1 [Source:MGI Symbol;Acc:MGI:98257]	GO:0016020(membrane); GO:0005044(scavenger receptor activity); GO:0006898(receptor-mediated endocytosis); GO:0005581(collagen trimer); GO:0051649(establishment of localization in cell); GO:0006897(endocytosis); GO:0005886(plasma membrane); GO:0034362(low-density lipoprotein particle); GO:0001540(amyloid-beta binding); GO:0042953(lipoprotein transport); GO:0038024(cargo receptor activity); GO:0010…	receptor-mediated endocytosis; establishment of localization in cell; endocytosis; lipoprotein transport; negative regulation of gene expression; amyloid-beta clearance; positive regulation of macrophage derived foam cell differentiation; phagocytosis, engulfment; positive regulation of cholesterol storage; cholesterol transport; plasma lipoprotein particle clearance	scavenger receptor activity; amyloid-beta binding; cargo receptor activity; low-density lipoprotein particle binding	membrane; collagen trimer; plasma membrane; low-density lipoprotein particle
ENSMUSG00000030798	4.77311	1.96813	8.19843	0.00419266	0.999996	13	1	364	14	0.467313	0.0496664	13.9703	0.697631	0.283626	7.42546	Cd37	CD37 antigen [Source:MGI Symbol;Acc:MGI:88330]	GO:0016020(membrane); GO:0005886(plasma membrane); GO:0050688(regulation of defense response to virus); GO:0042098(T cell proliferation); GO:0042130(negative regulation of T cell proliferation); GO:0042832(defense response to protozoan); GO:0002639(positive regulation of immunoglobulin production); GO:0030886(negative regulation of myeloid dendritic cell activation); GO:0002920(regulation of humo…	regulation of defense response to virus; T cell proliferation; negative regulation of T cell proliferation; defense response to protozoan; positive regulation of immunoglobulin production; negative regulation of myeloid dendritic cell activation; regulation of humoral immune response		membrane; plasma membrane; immunological synapse
ENSMUSG00000022488	4.76515	4.51716	5.70278	0.0169381	0.999996	88	1	2220	54	3.16335	0.0496664	85.2037	2.69086	1.69038	44.0524	Nckap1l	NCK associated protein 1 like [Source:MGI Symbol;Acc:MGI:1926063]	GO:0005737(cytoplasm); GO:0016020(membrane); GO:0005829(cytosol); GO:0005096(GTPase activator activity); GO:0006935(chemotaxis); GO:0016477(cell migration); GO:0000902(cell morphogenesis); GO:0001782(B cell homeostasis); GO:0030866(cortical actin cytoskeleton organization); GO:0043066(negative regulation of apoptotic process); GO:0031209(SCAR complex); GO:0044877(protein-containing complex bindin…	chemotaxis; cell migration; cell morphogenesis; B cell homeostasis; cortical actin cytoskeleton organization; negative regulation of apoptotic process; maintenance of cell polarity; positive regulation of erythrocyte differentiation; negative regulation of interleukin-17 production; response to xenobiotic stimulus; positive regulation of B cell differentiation; positive regulation of CD4-positive…	GTPase activator activity; protein-containing complex binding; protein kinase activator activity; TORC2 complex binding	cytoplasm; membrane; cytosol; SCAR complex; plasma membrane
ENSMUSG00000033777	4.75644	3.66585	6.20052	0.0127713	0.999996	48	1	1225	30	1.72546	0.0496664	47.0156	1.49492	0.95117	24.3585	Tlr13	toll-like receptor 13 [Source:MGI Symbol;Acc:MGI:3045213]	GO:0005515(protein binding); GO:0007165(signal transduction); GO:0016020(membrane); GO:0006955(immune response); GO:0004888(transmembrane signaling receptor activity); GO:0002224(toll-like receptor signaling pathway); GO:0005737(cytoplasm); GO:0009615(response to virus); GO:0005886(plasma membrane); GO:0003723(RNA binding); GO:0005768(endosome); GO:0006954(inflammatory response); GO:0045087(innat…	signal transduction; immune response; toll-like receptor signaling pathway; response to virus; inflammatory response; innate immune response; regulation of MAPK cascade; MyD88-dependent toll-like receptor signaling pathway; toll-like receptor 13 signaling pathway	protein binding; transmembrane signaling receptor activity; RNA binding; rRNA binding; NAD+ nucleotidase, cyclic ADP-ribose generating; signaling receptor activity; identical protein binding	membrane; cytoplasm; plasma membrane; endosome; endosome membrane
ENSMUSG00000049130	4.74668	3.6151	4.785	0.0287087	0.999996	48	0	1178	32	1.72546	0	45.2117	1.59459	0.929034	23.5055	C5ar1	complement component 5a receptor 1 [Source:MGI Symbol;Acc:MGI:88232]	GO:0004930(G protein-coupled receptor activity); GO:0007186(G protein-coupled receptor signaling pathway); GO:0016020(membrane); GO:0006935(chemotaxis); GO:0004875(complement receptor activity); GO:0043524(negative regulation of neuron apoptotic process); GO:0005886(plasma membrane); GO:0031410(cytoplasmic vesicle); GO:0016323(basolateral plasma membrane); GO:0009986(cell surface); GO:0007204(pos…	G protein-coupled receptor signaling pathway; chemotaxis; negative regulation of neuron apoptotic process; positive regulation of cytosolic calcium ion concentration; positive regulation of immune system process; neutrophil chemotaxis; response to peptidoglycan; defense response to Gram-positive bacterium; positive regulation of ERK1 and ERK2 cascade; phospholipase C-activating G protein-coupled …	G protein-coupled receptor activity; complement receptor activity; complement component C5a receptor activity; complement component C5a binding	membrane; plasma membrane; cytoplasmic vesicle; basolateral plasma membrane; cell surface; apical part of cell; vesicle
ENSMUSG00000052142	4.73317	1.89189	5.43053	0.0197876	0.999996	14	0	351	8	0.503261	0	13.4714	0.398646	0.281963	7.02963	Rasal3	RAS protein activator like 3 [Source:MGI Symbol;Acc:MGI:2444128]	GO:0043087(regulation of GTPase activity); GO:0005737(cytoplasm); GO:0005515(protein binding); GO:0005096(GTPase activator activity); GO:0005938(cell cortex); GO:0046580(negative regulation of Ras protein signal transduction); GO:0051142(positive regulation of NK T cell proliferation); GO:0042802(identical protein binding); GO:0098562(cytoplasmic side of membrane)	regulation of GTPase activity; negative regulation of Ras protein signal transduction; positive regulation of NK T cell proliferation	protein binding; GTPase activator activity; identical protein binding	cytoplasm; cell cortex; cytoplasmic side of membrane
ENSMUSG00000044583	4.71931	3.31029	5.47979	0.0192375	0.999996	38	1	970	11	1.36599	0.0496664	37.2287	0.548139	0.763577	18.9941	Tlr7	toll-like receptor 7 [Source:MGI Symbol;Acc:MGI:2176882]	GO:0005515(protein binding); GO:0007165(signal transduction); GO:0045944(positive regulation of transcription by RNA polymerase II); GO:0060907(positive regulation of macrophage cytokine production); GO:0098586(cellular response to virus); GO:0016020(membrane); GO:0005886(plasma membrane); GO:0005783(endoplasmic reticulum); GO:0005789(endoplasmic reticulum membrane); GO:0005768(endosome); GO:0051…	signal transduction; positive regulation of transcription by RNA polymerase II; positive regulation of macrophage cytokine production; cellular response to virus; defense response to virus; positive regulation of cytokine production; inflammatory response; innate immune response; regulation of primary metabolic process; JNK cascade; positive regulation of interleukin-6 production; positive regula…	protein binding; double-stranded RNA binding; siRNA binding; single-stranded RNA binding; pattern recognition receptor activity	membrane; plasma membrane; endoplasmic reticulum; endoplasmic reticulum membrane; endosome; lysosome; endosome membrane; receptor complex; phagocytic vesicle; early phagosome; cytoplasm
ENSMUSG00000074874	4.70987	2.43111	5.53059	0.0186868	0.999996	21.1	0	506.9	17.8	0.758486	0	19.4549	0.886988	0.420013	10.2663	Ctla2b	cytotoxic T lymphocyte-associated protein 2 beta [Source:MGI Symbol;Acc:MGI:88555]	GO:0005515(protein binding); GO:0004869(cysteine-type endopeptidase inhibitor activity)		protein binding; cysteine-type endopeptidase inhibitor activity
ENSMUSG00000020573	4.70825	2.68571	6.21591	0.0126607	0.999996	24	1	620	11	0.862732	0.0496664	23.7956	0.548139	0.497405	12.2731	Pik3cg	phosphatidylinositol-4,5-bisphosphate 3-kinase catalytic subunit gamma [Source:MGI Symbol;Acc:MGI:1353576]	GO:0071320(cellular response to cAMP); GO:0006629(lipid metabolic process); GO:0005737(cytoplasm); GO:0005886(plasma membrane); GO:0005524(ATP binding); GO:0005829(cytosol); GO:0004674(protein serine/threonine kinase activity); GO:0005515(protein binding); GO:0002376(immune system process); GO:0016301(kinase activity); GO:0006954(inflammatory response); GO:0046854(phosphatidylinositol phosphate b…	cellular response to cAMP; lipid metabolic process; immune system process; inflammatory response; phosphatidylinositol phosphate biosynthetic process; angiogenesis; chemotaxis; endocytosis; positive regulation of cytosolic calcium ion concentration; phosphatidylinositol-3-phosphate biosynthetic process; phosphatidylinositol 3-kinase/protein kinase B signal transduction; phosphatidylinositol-media…	ATP binding; protein serine/threonine kinase activity; protein binding; kinase activity; protein serine kinase activity; 1-phosphatidylinositol-4,5-bisphosphate 3-kinase activity; 1-phosphatidylinositol-3-kinase activity; 1-phosphatidylinositol-4-phosphate 3-kinase activity; identical protein binding; ephrin receptor binding	cytoplasm; plasma membrane; cytosol; phosphatidylinositol 3-kinase complex; phosphatidylinositol 3-kinase complex, class IA; phosphatidylinositol 3-kinase complex, class IB; membrane
ENSMUSG00000026126	4.68838	1.31539	8.59607	0.00336889	0.999996	8	1	227	9	0.287577	0.0496664	8.71227	0.448477	0.184307	4.66566	Ptpn18	protein tyrosine phosphatase, non-receptor type 18 [Source:MGI Symbol;Acc:MGI:108410]	GO:0004725(protein tyrosine phosphatase activity); GO:0006470(protein dephosphorylation); GO:0016311(dephosphorylation); GO:0004726(non-membrane spanning protein tyrosine phosphatase activity); GO:0005634(nucleus); GO:0005515(protein binding); GO:0005737(cytoplasm); GO:0043229(intracellular organelle); GO:0004721(phosphoprotein phosphatase activity); GO:0001825(blastocyst formation); GO:0016787(h…	protein dephosphorylation; dephosphorylation; blastocyst formation	protein tyrosine phosphatase activity; non-membrane spanning protein tyrosine phosphatase activity; protein binding; phosphoprotein phosphatase activity; hydrolase activity	nucleus; cytoplasm; intracellular organelle
ENSMUSG00000036905	4.68798	6.56675	3.49693	0.0614827	0.999996	393	0	9221	214	14.1272	0	353.903	10.6638	7.18415	182.39	C1qb	complement component 1, q subcomponent, beta polypeptide [Source:MGI Symbol;Acc:MGI:88224]	GO:0005515(protein binding); GO:0045202(synapse); GO:0005576(extracellular region); GO:0098978(glutamatergic synapse); GO:0005581(collagen trimer); GO:0045087(innate immune response); GO:0006958(complement activation, classical pathway); GO:0042802(identical protein binding); GO:0048839(inner ear development); GO:0005615(extracellular space); GO:0098888(extrinsic component of presynaptic membrane…	innate immune response; complement activation, classical pathway; inner ear development; synapse pruning	protein binding; identical protein binding	synapse; extracellular region; glutamatergic synapse; collagen trimer; extracellular space; extrinsic component of presynaptic membrane; extrinsic component of postsynaptic membrane; postsynapse; complement component C1 complex; complement component C1q complex
ENSMUSG00000015355	4.68203	2.02532	5.36487	0.0205463	0.999996	16	0	384	10	0.575155	0	14.7379	0.498308	0.321091	7.71298	Cd48	CD48 antigen [Source:MGI Symbol;Acc:MGI:88339]	GO:0005515(protein binding); GO:0009897(external side of plasma membrane); GO:0005886(plasma membrane); GO:0098552(side of membrane); GO:0005576(extracellular region); GO:0032991(protein-containing complex); GO:0007165(signal transduction); GO:0042110(T cell activation); GO:0045576(mast cell activation)	signal transduction; T cell activation; mast cell activation	protein binding	external side of plasma membrane; plasma membrane; side of membrane; extracellular region; protein-containing complex
ENSMUSG00000085295	4.67423	1.77568	6.96804	0.00829784	0.999996	12	1	323	7	0.431366	0.0496664	12.3968	0.348816	0.263893	6.46665	4930430E12Rik	RIKEN cDNA 4930430E12 gene [Source:MGI Symbol;Acc:MGI:1918889]
ENSMUSG00000021423	4.66603	2.78153	5.0938	0.0240115	0.999996	28	0	652	20	1.00652	0	25.0238	0.996616	0.552282	13.1085	Ly86	lymphocyte antigen 86 [Source:MGI Symbol;Acc:MGI:1321404]	GO:0006955(immune response); GO:0005576(extracellular region); GO:0005515(protein binding); GO:0006954(inflammatory response); GO:0045087(innate immune response); GO:0031663(lipopolysaccharide-mediated signaling pathway); GO:0031666(positive regulation of lipopolysaccharide-mediated signaling pathway)	immune response; inflammatory response; innate immune response; lipopolysaccharide-mediated signaling pathway; positive regulation of lipopolysaccharide-mediated signaling pathway	protein binding	extracellular region
ENSMUSG00000021322	4.62751	3.15888	9.08966	0.00257059	0.999996	28	7	852	24	1.00652	0.347665	32.6998	1.19594	0.706024	17.0485	Aoah	acyloxyacyl hydrolase [Source:MGI Symbol;Acc:MGI:1350928]	GO:0016788(hydrolase activity, acting on ester bonds); GO:0050528(acyloxyacyl hydrolase activity); GO:0050728(negative regulation of inflammatory response); GO:0006629(lipid metabolic process); GO:0046872(metal ion binding); GO:0005509(calcium ion binding); GO:0016787(hydrolase activity); GO:0031410(cytoplasmic vesicle); GO:0005576(extracellular region); GO:0006631(fatty acid metabolic process); …	negative regulation of inflammatory response; lipid metabolic process; fatty acid metabolic process; lipopolysaccharide metabolic process; lipopolysaccharide catabolic process	hydrolase activity, acting on ester bonds; acyloxyacyl hydrolase activity; metal ion binding; calcium ion binding; hydrolase activity	cytoplasmic vesicle; extracellular region
ENSMUSG00000030579	4.62094	4.60819	4.08279	0.0433221	0.999996	105	0	2353	60	3.77445	0	90.3083	2.98985	1.97856	46.754	Tyrobp	TYRO protein tyrosine kinase binding protein [Source:MGI Symbol;Acc:MGI:1277211]	GO:0016020(membrane); GO:0005102(signaling receptor binding); GO:0030674(protein-macromolecule adaptor activity); GO:0042802(identical protein binding); GO:0042803(protein homodimerization activity); GO:0060090(molecular adaptor activity); GO:0002222(stimulatory killer cell immunoglobulin-like receptor signaling pathway); GO:0002223(stimulatory C-type lectin receptor signaling pathway); GO:000227…	stimulatory killer cell immunoglobulin-like receptor signaling pathway; stimulatory C-type lectin receptor signaling pathway; myeloid leukocyte activation; osteoclast differentiation; negative regulation of B cell proliferation; negative regulation of type I interferon production; positive regulation of macrophage fusion; protein stabilization; amyloid-beta clearance; cellular response to amyloid…	signaling receptor binding; protein-macromolecule adaptor activity; identical protein binding; protein homodimerization activity; molecular adaptor activity; protein binding; metal ion binding	membrane; plasma membrane; cell surface
ENSMUSG00000099398	4.61235	1.56878	4.30004	0.0381115	0.999996	12	0	283	2	0.431366	0	10.8616	0.0996616	0.242614	5.57602	Ms4a14	membrane-spanning 4-domains, subfamily A, member 14 [Source:MGI Symbol;Acc:MGI:2686122]	GO:0016020(membrane); GO:0007166(cell surface receptor signaling pathway); GO:0005886(plasma membrane)	cell surface receptor signaling pathway		membrane; plasma membrane
ENSMUSG00000060063	4.60563	2.9766	8.25621	0.00406127	0.999996	28	4	748	22	1.00652	0.198666	28.7083	1.09628	0.639641	15.0018	Alox5ap	arachidonate 5-lipoxygenase activating protein [Source:MGI Symbol;Acc:MGI:107505]	GO:0016020(membrane); GO:0008047(enzyme activator activity); GO:0006691(leukotriene metabolic process); GO:0005634(nucleus); GO:0005515(protein binding); GO:0044877(protein-containing complex binding); GO:0005783(endoplasmic reticulum); GO:0005789(endoplasmic reticulum membrane); GO:0031965(nuclear membrane); GO:0098869(cellular oxidant detoxification); GO:0019370(leukotriene biosynthetic process…	leukotriene metabolic process; cellular oxidant detoxification; leukotriene biosynthetic process; lipoxygenase pathway; positive regulation of acute inflammatory response; leukotriene production involved in inflammatory response; protein homotrimerization; cellular response to calcium ion	enzyme activator activity; protein binding; protein-containing complex binding; identical protein binding; enzyme binding; glutathione transferase activity; leukotriene-C4 synthase activity; glutathione peroxidase activity; arachidonate 5-lipoxygenase activity; arachidonic acid binding	membrane; nucleus; endoplasmic reticulum; endoplasmic reticulum membrane; nuclear membrane; nuclear envelope
ENSMUSG00000038642	4.59286	5.53285	3.85066	0.0497263	0.999996	204	0	4428	149	7.33323	0	169.947	7.42479	3.77523	88.7896	Ctss	cathepsin S [Source:MGI Symbol;Acc:MGI:107341]	GO:0006508(proteolysis); GO:0008234(cysteine-type peptidase activity); GO:0031410(cytoplasmic vesicle); GO:0005576(extracellular region); GO:0004197(cysteine-type endopeptidase activity); GO:0005764(lysosome); GO:0001968(fibronectin binding); GO:0005518(collagen binding); GO:0043236(laminin binding); GO:0043394(proteoglycan binding); GO:0002250(adaptive immune response); GO:0010447(response to ac…	proteolysis; adaptive immune response; response to acidic pH; protein processing; antigen processing and presentation of exogenous peptide antigen via MHC class II; collagen catabolic process; basement membrane disassembly; antigen processing and presentation of peptide antigen; proteolysis involved in protein catabolic process; cellular response to thyroid hormone stimulus; immune response; apop…	cysteine-type peptidase activity; cysteine-type endopeptidase activity; fibronectin binding; collagen binding; laminin binding; proteoglycan binding; cysteine-type endopeptidase activator activity involved in apoptotic process; peptidase activity	cytoplasmic vesicle; extracellular region; lysosome; extracellular space; late endosome; intracellular membrane-bounded organelle; phagocytic vesicle; membrane; cell surface; early endosome lumen
ENSMUSG00000112023	4.58051	3.25562	4.60513	0.0318764	0.999996	41.62	0	910.83	25.47	1.49612	0	34.9577	1.26919	0.809669	18.2145	Lilrb4b	leukocyte immunoglobulin-like receptor, subfamily B, member 4B [Source:MGI Symbol;Acc:MGI:102702]	GO:0005886(plasma membrane); GO:0019221(cytokine-mediated signaling pathway); GO:0002376(immune system process); GO:0032396(inhibitory MHC class I receptor activity); GO:0002764(immune response-regulating signaling pathway); GO:0009986(cell surface); GO:0045576(mast cell activation); GO:0016020(membrane)	cytokine-mediated signaling pathway; immune system process; immune response-regulating signaling pathway; mast cell activation	inhibitory MHC class I receptor activity	plasma membrane; cell surface; membrane
ENSMUSG00000029925	4.56829	3.29073	8.73552	0.00312071	0.999996	32	8	936	24	1.15031	0.397331	35.9237	1.19594	0.804916	18.6616	Tbxas1	thromboxane A synthase 1, platelet [Source:MGI Symbol;Acc:MGI:98497]	GO:0004497(monooxygenase activity); GO:0020037(heme binding); GO:0005506(iron ion binding); GO:0016705(oxidoreductase activity, acting on paired donors, with incorporation or reduction of molecular oxygen); GO:0016020(membrane); GO:0046872(metal ion binding); GO:0005783(endoplasmic reticulum); GO:0005789(endoplasmic reticulum membrane); GO:0016829(lyase activity); GO:0006690(icosanoid metabolic p…	icosanoid metabolic process; prostaglandin biosynthetic process; positive regulation of vasoconstriction; intracellular chloride ion homeostasis; response to ethanol; response to fatty acid	monooxygenase activity; heme binding; iron ion binding; oxidoreductase activity, acting on paired donors, with incorporation or reduction of molecular oxygen; metal ion binding; lyase activity; isomerase activity; hydroperoxy icosatetraenoate dehydratase activity; thromboxane-A synthase activity; 12-hydroxyheptadecatrienoic acid synthase activity	membrane; endoplasmic reticulum; endoplasmic reticulum membrane; cytosol
ENSMUSG00000071713	4.56806	1.58397	5.33256	0.0209306	0.999996	12.48	0	279.49	7	0.448621	0	10.7268	0.348816	0.252079	5.62909	Csf2rb	colony stimulating factor 2 receptor, beta, low-affinity (granulocyte-macrophage) [Source:MGI Symbol;Acc:MGI:1339759]	GO:0005515(protein binding); GO:0016020(membrane); GO:0004896(cytokine receptor activity); GO:0019221(cytokine-mediated signaling pathway); GO:0016064(immunoglobulin mediated immune response); GO:0009897(external side of plasma membrane); GO:0001558(regulation of cell growth)	cytokine-mediated signaling pathway; immunoglobulin mediated immune response; regulation of cell growth	protein binding; cytokine receptor activity	membrane; external side of plasma membrane
ENSMUSG00000054675	4.56388	2.17753	6.43687	0.0111775	0.999996	18	1	428	10	0.647049	0.0496664	16.4267	0.498308	0.381469	8.55908	Tmem119	transmembrane protein 119 [Source:MGI Symbol;Acc:MGI:2385228]	GO:0001503(ossification); GO:0005515(protein binding); GO:0001649(osteoblast differentiation); GO:0005737(cytoplasm); GO:0005886(plasma membrane); GO:0005783(endoplasmic reticulum); GO:0005789(endoplasmic reticulum membrane); GO:0030154(cell differentiation); GO:0005576(extracellular region); GO:0007283(spermatogenesis); GO:0031214(biomineral tissue development); GO:0045669(positive regulation of…	ossification; osteoblast differentiation; cell differentiation; spermatogenesis; biomineral tissue development; positive regulation of osteoblast differentiation; positive regulation of bone mineralization; positive regulation of gene expression; positive regulation of osteoblast proliferation; spermatid differentiation; positive regulation of protein phosphorylation; positive regulation of bone …	protein binding	cytoplasm; plasma membrane; endoplasmic reticulum; endoplasmic reticulum membrane; extracellular region
ENSMUSG00000059498	4.54792	3.89833	4.40344	0.0358664	0.999996	67	0	1417.76	47	2.40846	0	54.4137	2.34205	1.28152	28.4794	Fcgr3	Fc receptor, IgG, low affinity III [Source:MGI Symbol;Acc:MGI:95500]	GO:0016020(membrane)			membrane
ENSMUSG00000002699	4.54225	2.08424	6.22657	0.0125847	0.999996	17	1	402	8	0.611102	0.0496664	15.4288	0.398646	0.362	8.01049	Lcp2	lymphocyte cytosolic protein 2 [Source:MGI Symbol;Acc:MGI:1321402]	GO:0005515(protein binding); GO:0005737(cytoplasm); GO:0005911(cell-cell junction); GO:0035556(intracellular signal transduction); GO:0005829(cytosol); GO:0007169(cell surface receptor protein tyrosine kinase signaling pathway); GO:0045576(mast cell activation); GO:0050852(T cell receptor signaling pathway); GO:0044853(plasma membrane raft); GO:0036398(TCR signalosome)	intracellular signal transduction; cell surface receptor protein tyrosine kinase signaling pathway; mast cell activation; T cell receptor signaling pathway	protein binding	cytoplasm; cell-cell junction; cytosol; plasma membrane raft; TCR signalosome
ENSMUSG00000079419	4.53894	2.93234	4.68263	0.030469	0.999996	34	0	724	21	1.2222	0	27.7872	1.04645	0.666175	14.5162	Ms4a6c	membrane-spanning 4-domains, subfamily A, member 6C [Source:MGI Symbol;Acc:MGI:2385644]	GO:0016020(membrane); GO:0007166(cell surface receptor signaling pathway); GO:0005886(plasma membrane); GO:0005802(trans-Golgi network)	cell surface receptor signaling pathway		membrane; plasma membrane; trans-Golgi network
ENSMUSG00000052160	4.52542	4.48695	5.35126	0.0207073	0.999996	100	2	2180	37	3.59472	0.0993328	83.6685	1.84374	1.93299	42.8632	Pld4	phospholipase D family member 4 [Source:MGI Symbol;Acc:MGI:2144765]	GO:0003824(catalytic activity); GO:0005634(nucleus); GO:0005515(protein binding); GO:0016020(membrane); GO:0005794(Golgi apparatus); GO:0005783(endoplasmic reticulum); GO:0005789(endoplasmic reticulum membrane); GO:0005768(endosome); GO:0004527(exonuclease activity); GO:0006259(DNA metabolic process); GO:0006954(inflammatory response); GO:0045087(innate immune response); GO:0006909(phagocytosis);…	DNA metabolic process; inflammatory response; innate immune response; phagocytosis; establishment of localization in cell; hematopoietic progenitor cell differentiation; regulation of cytokine production involved in inflammatory response	catalytic activity; protein binding; exonuclease activity; phospholipase D activity; single-stranded DNA 5'-3' DNA exonuclease activity	nucleus; membrane; Golgi apparatus; endoplasmic reticulum; endoplasmic reticulum membrane; endosome; early endosome; phagocytic vesicle; trans-Golgi network membrane
ENSMUSG00000015950	4.51424	4.49021	5.50569	0.0189547	0.999996	101	2	2174	45	3.63067	0.0993328	83.4383	2.24239	1.95128	42.9464	Ncf1	neutrophil cytosolic factor 1 [Source:MGI Symbol;Acc:MGI:97283]	GO:0009617(response to bacterium); GO:0005515(protein binding); GO:0006954(inflammatory response); GO:0005829(cytosol); GO:0005737(cytoplasm); GO:0050673(epithelial cell proliferation); GO:0016020(membrane); GO:0005886(plasma membrane); GO:0035091(phosphatidylinositol binding); GO:0008289(lipid binding); GO:0043025(neuronal cell body); GO:0042742(defense response to bacterium); GO:0030425(dendrit…	response to bacterium; inflammatory response; epithelial cell proliferation; defense response to bacterium; respiratory burst; leukotriene metabolic process; superoxide anion generation; defense response to Gram-positive bacterium; defense response to fungus; cellular defense response; NADP catabolic process; protein targeting to membrane; hydrogen peroxide biosynthetic process; response to yeast…	protein binding; phosphatidylinositol binding; lipid binding; phosphatidylinositol-3,4-bisphosphate binding; superoxide-generating NADPH oxidase activator activity; superoxide-generating NAD(P)H oxidase activity; SH3 domain binding	cytosol; cytoplasm; membrane; plasma membrane; neuronal cell body; dendrite; NADPH oxidase complex; cytoplasmic side of plasma membrane
ENSMUSG00000024397	4.46348	1.82317	5.74398	0.0165452	0.999996	16	0	321	16	0.575155	0	12.32	0.797293	0.321091	6.64628	Aif1	allograft inflammatory factor 1 [Source:MGI Symbol;Acc:MGI:1343098]	GO:0005509(calcium ion binding); GO:0043066(negative regulation of apoptotic process); GO:0010629(negative regulation of gene expression); GO:0005515(protein binding); GO:0005737(cytoplasm); GO:0005634(nucleus); GO:0042995(cell projection); GO:0046872(metal ion binding); GO:0005886(plasma membrane); GO:0005829(cytosol); GO:0005856(cytoskeleton); GO:0030027(lamellipodium); GO:0003779(actin binding…	negative regulation of apoptotic process; negative regulation of gene expression; inflammatory response; positive regulation of protein phosphorylation; positive regulation of nitric oxide biosynthetic process; cellular response to type II interferon; positive regulation of cell migration; actin filament bundle assembly; positive regulation of smooth muscle cell proliferation; positive regulation…	calcium ion binding; protein binding; metal ion binding; actin binding; actin filament binding	cytoplasm; nucleus; cell projection; plasma membrane; cytosol; cytoskeleton; lamellipodium; ruffle membrane; perikaryon; ruffle; phagocytic cup; glial cell projection; actin filament; perinuclear region of cytoplasm
ENSMUSG00000026656	4.44092	2.87188	5.97714	0.0144925	0.999996	32	2	702.24	12	1.15031	0.0993328	26.952	0.59797	0.671998	13.8772	Fcgr2b	Fc receptor, IgG, low affinity IIb [Source:MGI Symbol;Acc:MGI:95499]	GO:0005886(plasma membrane)			plasma membrane
ENSMUSG00000015947	4.43381	1.61213	4.43787	0.0351501	0.999996	14	0	288	4	0.503261	0	11.0535	0.199323	0.281963	5.72051	Fcgr1	Fc receptor, IgG, high affinity I [Source:MGI Symbol;Acc:MGI:95498]	GO:0009617(response to bacterium); GO:0007166(cell surface receptor signaling pathway); GO:0009897(external side of plasma membrane); GO:0005886(plasma membrane); GO:0045087(innate immune response); GO:0050776(regulation of immune response); GO:0050766(positive regulation of phagocytosis); GO:0042742(defense response to bacterium); GO:0019770(IgG receptor activity); GO:0019864(IgG binding); GO:00…	response to bacterium; cell surface receptor signaling pathway; innate immune response; regulation of immune response; positive regulation of phagocytosis; defense response to bacterium; antibody-dependent cellular cytotoxicity; Fc-gamma receptor signaling pathway; receptor-mediated endocytosis; positive regulation of phagocytosis, engulfment; positive regulation of type IIa hypersensitivity; ant…	IgG receptor activity; IgG binding; high-affinity IgG receptor activity; leukotriene receptor binding	external side of plasma membrane; plasma membrane
ENSMUSG00000002603	4.43073	3.25808	8.02458	0.00461466	0.999996	31	11	918	18	1.11436	0.54633	35.2329	0.896954	0.853142	18.1681	Tgfb1	transforming growth factor, beta 1 [Source:MGI Symbol;Acc:MGI:98725]	GO:0005576(extracellular region); GO:0008083(growth factor activity); GO:0005615(extracellular space); GO:0005160(transforming growth factor beta receptor binding); GO:0010467(gene expression); GO:0010629(negative regulation of gene expression); GO:0051726(regulation of cell cycle); GO:0010628(positive regulation of gene expression); GO:0045944(positive regulation of transcription by RNA polymera…	gene expression; negative regulation of gene expression; regulation of cell cycle; positive regulation of gene expression; positive regulation of transcription by RNA polymerase II; positive regulation of fibroblast proliferation; myelination; retina vasculature development in camera-type eye; canonical Wnt signaling pathway; regulation of gene expression; inflammatory response; positive regulati…	growth factor activity; transforming growth factor beta receptor binding; protein binding; protein-containing complex binding; cytokine activity; identical protein binding; protein serine/threonine kinase activator activity; type II transforming growth factor beta receptor binding; enzyme binding; type I transforming growth factor beta receptor binding; type III transforming growth factor beta re…	extracellular region; extracellular space; cytoplasm; axon; nucleus; extracellular matrix; neuronal cell body; cell surface; secretory granule; microvillus; collagen-containing extracellular matrix; blood microparticle
ENSMUSG00000015340	4.42651	4.16847	6.59349	0.0102352	0.999996	85	2	1664	89	3.05551	0.0993328	63.8644	4.43494	1.65808	34.2465	Cybb	cytochrome b-245, beta polypeptide [Source:MGI Symbol;Acc:MGI:88574]	GO:0016020(membrane); GO:0016491(oxidoreductase activity); GO:0005739(mitochondrion); GO:0045766(positive regulation of angiogenesis); GO:0005737(cytoplasm); GO:0046872(metal ion binding); GO:0005886(plasma membrane); GO:0034220(monoatomic ion transmembrane transport); GO:0005515(protein binding); GO:0034702(monoatomic ion channel complex); GO:0043025(neuronal cell body); GO:0006954(inflammatory …	positive regulation of angiogenesis; monoatomic ion transmembrane transport; inflammatory response; innate immune response; response to xenobiotic stimulus; positive regulation of tumor necrosis factor production; defense response; superoxide anion generation; superoxide metabolic process; hydrogen peroxide biosynthetic process; hypoxia-inducible factor-1alpha signaling pathway; response to nutri…	oxidoreductase activity; metal ion binding; protein binding; superoxide-generating NAD(P)H oxidase activity; electron transfer activity; heme binding; protein heterodimerization activity; flavin adenine dinucleotide binding	membrane; mitochondrion; cytoplasm; plasma membrane; monoatomic ion channel complex; neuronal cell body; dendrite; NADPH oxidase complex; nuclear envelope; perinuclear endoplasmic reticulum; phagocytic vesicle
ENSMUSG00000078771	4.42649	2.28244	4.28048	0.0385525	0.999996	23	0	462.65	8	0.826785	0	17.7565	0.398646	0.456596	9.17639	Evi2a	ecotropic viral integration site 2a [Source:MGI Symbol;Acc:MGI:95458]	GO:0016020(membrane)			membrane
ENSMUSG00000089929	4.40933	2.93976	4.34084	0.0372086	0.999996	37.3	0	726.84	19.57	1.34083	0	27.8962	0.975189	0.728459	14.5356	Bcl2a1b	B cell leukemia/lymphoma 2 related protein A1b [Source:MGI Symbol;Acc:MGI:1278326]	GO:0042981(regulation of apoptotic process); GO:0043066(negative regulation of apoptotic process); GO:0044877(protein-containing complex binding); GO:0006915(apoptotic process); GO:0055085(transmembrane transport); GO:0051400(BH domain binding); GO:0001836(release of cytochrome c from mitochondria); GO:0008630(intrinsic apoptotic signaling pathway in response to DNA damage); GO:0097192(extrinsic …	regulation of apoptotic process; negative regulation of apoptotic process; apoptotic process; transmembrane transport; release of cytochrome c from mitochondria; intrinsic apoptotic signaling pathway in response to DNA damage; extrinsic apoptotic signaling pathway in absence of ligand; mitochondrial fusion	protein-containing complex binding; BH domain binding; channel activity	mitochondrial outer membrane
ENSMUSG00000040552	4.40339	4.57975	4.10909	0.0426534	0.999996	119	0	2223	112	4.27771	0	85.3189	5.58105	2.23382	45.5483	C3ar1	complement component 3a receptor 1 [Source:MGI Symbol;Acc:MGI:1097680]	GO:0004930(G protein-coupled receptor activity); GO:0007186(G protein-coupled receptor signaling pathway); GO:0016020(membrane); GO:0006935(chemotaxis); GO:0004875(complement receptor activity); GO:0004876(complement component C3a receptor activity); GO:0008217(regulation of blood pressure); GO:0005886(plasma membrane); GO:0007204(positive regulation of cytosolic calcium ion concentration); GO:00…	G protein-coupled receptor signaling pathway; chemotaxis; regulation of blood pressure; positive regulation of cytosolic calcium ion concentration; positive regulation of immune system process; phospholipase C-activating G protein-coupled receptor signaling pathway; complement receptor mediated signaling pathway; inflammatory response; positive regulation of cell migration; positive regulation of…	G protein-coupled receptor activity; complement receptor activity; complement component C3a receptor activity; complement component C3a binding; complement component C5a receptor activity	membrane; plasma membrane
ENSMUSG00000000290	4.37949	4.01987	10.9526	0.000934701	0.87079	50	23	1520	63	1.79736	1.14233	58.3377	3.13934	1.489	30.8381	Itgb2	integrin beta 2 [Source:MGI Symbol;Acc:MGI:96611]	GO:0005886(plasma membrane); GO:0007155(cell adhesion); GO:0045121(membrane raft); GO:0007229(integrin-mediated signaling pathway); GO:0006909(phagocytosis); GO:0044877(protein-containing complex binding); GO:0050839(cell adhesion molecule binding); GO:0002523(leukocyte migration involved in inflammatory response); GO:0007159(leukocyte cell-cell adhesion); GO:0043542(endothelial cell migration); …	cell adhesion; integrin-mediated signaling pathway; phagocytosis; leukocyte migration involved in inflammatory response; leukocyte cell-cell adhesion; endothelial cell migration; cellular extravasation; positive regulation of nitric oxide biosynthetic process; positive regulation of angiogenesis; cell-cell adhesion	protein-containing complex binding; cell adhesion molecule binding	plasma membrane; membrane raft; cell surface; membrane
ENSMUSG00000046410	4.35243	1.47735	6.05908	0.0138349	0.999996	12	1	259	5	0.431366	0.0496664	9.94044	0.249154	0.263893	5.18623	Kcnk6	potassium inwardly-rectifying channel, subfamily K, member 6 [Source:MGI Symbol;Acc:MGI:1891291]	GO:0016020(membrane); GO:0006813(potassium ion transport); GO:0005267(potassium channel activity); GO:0071805(potassium ion transmembrane transport); GO:0005886(plasma membrane); GO:0015271(outward rectifier potassium channel activity); GO:0022841(potassium ion leak channel activity); GO:0030322(stabilization of membrane potential); GO:0003085(negative regulation of systemic arterial blood pressu…	potassium ion transport; potassium ion transmembrane transport; stabilization of membrane potential; negative regulation of systemic arterial blood pressure; regulation of systemic arterial blood pressure; regulation of resting membrane potential	potassium channel activity; outward rectifier potassium channel activity; potassium ion leak channel activity	membrane; plasma membrane
ENSMUSG00000030144	4.34749	2.62367	4.84393	0.0277437	0.999996	31	0	566	27	1.11436	0	21.7231	1.34543	0.609342	11.6275	Clec4d	C-type lectin domain family 4, member d [Source:MGI Symbol;Acc:MGI:1298389]	GO:0016020(membrane); GO:0046872(metal ion binding); GO:0002250(adaptive immune response); GO:0009897(external side of plasma membrane); GO:0005886(plasma membrane); GO:0030246(carbohydrate binding); GO:0045087(innate immune response); GO:0042742(defense response to bacterium); GO:0061760(antifungal innate immune response); GO:0043123(positive regulation of canonical NF-kappaB signal transduction…	adaptive immune response; innate immune response; defense response to bacterium; antifungal innate immune response; positive regulation of canonical NF-kappaB signal transduction; T cell differentiation involved in immune response; Fc-gamma receptor signaling pathway; positive regulation of myeloid dendritic cell activation	metal ion binding; carbohydrate binding; mannose binding; pattern recognition receptor activity; immunoglobulin receptor binding	membrane; external side of plasma membrane; plasma membrane
ENSMUSG00000026979	4.34132	2.086	6.75718	0.00933713	0.999996	17	3	400	8	0.611102	0.148999	15.352	0.398646	0.405182	7.97203	Psd4	pleckstrin and Sec7 domain containing 4 [Source:MGI Symbol;Acc:MGI:2674093]	GO:0005085(guanyl-nucleotide exchange factor activity); GO:0032012(regulation of ARF protein signal transduction); GO:0042995(cell projection); GO:0005886(plasma membrane); GO:0008289(lipid binding); GO:0032587(ruffle membrane)	regulation of ARF protein signal transduction	guanyl-nucleotide exchange factor activity; lipid binding	cell projection; plasma membrane; ruffle membrane
ENSMUSG00000018774	4.32363	5.26297	11.8813	0.000567007	0.685057	107	69	3595	158	3.84635	3.42698	137.976	7.87327	3.64306	73.0256	Cd68	CD68 antigen [Source:MGI Symbol;Acc:MGI:88342]	GO:0016020(membrane); GO:0005886(plasma membrane); GO:0005765(lysosomal membrane); GO:0005768(endosome); GO:0005764(lysosome); GO:0031902(late endosome membrane); GO:0010008(endosome membrane); GO:0035425(autocrine signaling); GO:0071222(cellular response to lipopolysaccharide); GO:0072594(establishment of protein localization to organelle); GO:0140052(cellular response to oxidised low-density li…	autocrine signaling; cellular response to lipopolysaccharide; establishment of protein localization to organelle; cellular response to oxidised low-density lipoprotein particle stimulus; inflammatory response to antigenic stimulus; negative regulation of dendritic cell antigen processing and presentation; cellular response to nutrient levels		membrane; plasma membrane; lysosomal membrane; endosome; lysosome; late endosome membrane; endosome membrane
ENSMUSG00000062593	4.2957	2.84366	2.08418	0.148832	0.999996	37.67	0	700.1	0	1.35413	0	26.8699	0	0.735428	13.5416	Gm49339	predicted gene, 49339 [Source:MGI Symbol;Acc:MGI:6121530]	GO:0016020(membrane); GO:0071222(cellular response to lipopolysaccharide); GO:0009611(response to wounding); GO:0006954(inflammatory response); GO:0002437(inflammatory response to antigenic stimulus); GO:0032496(response to lipopolysaccharide); GO:0005886(plasma membrane); GO:0002250(adaptive immune response); GO:0009897(external side of plasma membrane); GO:0019221(cytokine-mediated signaling pa…	cellular response to lipopolysaccharide; response to wounding; inflammatory response; inflammatory response to antigenic stimulus; response to lipopolysaccharide; adaptive immune response; cytokine-mediated signaling pathway; immune response-regulating signaling pathway; neutrophil homeostasis; blood coagulation; negative regulation of natural killer cell activation; response to other organism; r…	inhibitory MHC class I receptor activity; protein phosphatase binding; phosphatase binding; fibronectin binding; integrin binding	membrane; plasma membrane; external side of plasma membrane; cell surface
ENSMUSG00000022831	4.2892	3.31666	6.15586	0.0130977	0.999996	50	2	935	32	1.79736	0.0993328	35.8854	1.59459	1.01074	18.8395	Hcls1	hematopoietic cell specific Lyn substrate 1 [Source:MGI Symbol;Acc:MGI:104568]	GO:0005515(protein binding); GO:0044877(protein-containing complex binding); GO:0005634(nucleus); GO:0005737(cytoplasm); GO:0005886(plasma membrane); GO:0005739(mitochondrion); GO:0051015(actin filament binding); GO:0016477(cell migration); GO:0030427(site of polarized growth); GO:0030833(regulation of actin filament polymerization); GO:0008284(positive regulation of cell population proliferation…	cell migration; regulation of actin filament polymerization; positive regulation of cell population proliferation; positive regulation of transcription by RNA polymerase II; erythrocyte differentiation; negative regulation of transcription by RNA polymerase II; response to hormone; actin filament organization; positive regulation of granulocyte differentiation; granulocyte colony-stimulating fact…	protein binding; protein-containing complex binding; actin filament binding; SH3 domain binding; protein kinase binding; signaling adaptor activity; RNA polymerase II-specific DNA-binding transcription factor binding	nucleus; cytoplasm; plasma membrane; mitochondrion; site of polarized growth; cortical actin cytoskeleton; actin filament; cytosol; transcription regulator complex
ENSMUSG00000024965	4.25228	3.44255	8.30643	0.0039505	0.999996	44	11	1025	31	1.58168	0.54633	39.3396	1.54475	1.1003	20.5432	Fermt3	fermitin family member 3 [Source:MGI Symbol;Acc:MGI:2147790]	GO:0007229(integrin-mediated signaling pathway); GO:0042995(cell projection); GO:0007155(cell adhesion); GO:0070161(anchoring junction); GO:0005515(protein binding); GO:0007159(leukocyte cell-cell adhesion); GO:0002102(podosome); GO:0005178(integrin binding); GO:0007160(cell-matrix adhesion); GO:0070527(platelet aggregation); GO:0030335(positive regulation of cell migration); GO:0033622(integrin …	integrin-mediated signaling pathway; cell adhesion; leukocyte cell-cell adhesion; cell-matrix adhesion; platelet aggregation; positive regulation of cell migration; integrin activation; substrate adhesion-dependent cell spreading; regulation of cell-cell adhesion mediated by integrin	protein binding; integrin binding	cell projection; anchoring junction; podosome; cell-substrate junction
ENSMUSG00000031101	4.202	1.86771	6.44758	0.0111104	0.999996	13	5	343	5	0.467313	0.248332	13.1644	0.249154	0.370073	6.80298	Sash3	SAM and SH3 domain containing 3 [Source:MGI Symbol;Acc:MGI:1921381]	GO:0005515(protein binding); GO:0005634(nucleus); GO:0032729(positive regulation of type II interferon production); GO:0005737(cytoplasm); GO:0048873(homeostasis of number of cells within a tissue); GO:0042100(B cell proliferation); GO:0030890(positive regulation of B cell proliferation); GO:0032760(positive regulation of tumor necrosis factor production); GO:0042098(T cell proliferation); GO:003…	positive regulation of type II interferon production; homeostasis of number of cells within a tissue; B cell proliferation; positive regulation of B cell proliferation; positive regulation of tumor necrosis factor production; T cell proliferation; positive regulation of interleukin-10 production; positive regulation of interleukin-4 production; B cell homeostasis; positive regulation of organ gro…	protein binding	nucleus; cytoplasm
ENSMUSG00000043008	4.20038	1.65807	3.50597	0.0611481	0.999996	17	0	298	2	0.611102	0	11.4373	0.0996616	0.34058	5.86467	Klhl6	kelch-like 6 [Source:MGI Symbol;Acc:MGI:2686922]	GO:0005515(protein binding); GO:0050853(B cell receptor signaling pathway); GO:0002467(germinal center formation); GO:0009617(response to bacterium)	B cell receptor signaling pathway; germinal center formation; response to bacterium	protein binding
ENSMUSG00000098112	4.2	1.49138	4.43535	0.035202	0.999996	15	0	259	6	0.539208	0	9.94044	0.298985	0.301553	5.21032	Bin2	bridging integrator 2 [Source:MGI Symbol;Acc:MGI:3611448]	GO:0005515(protein binding); GO:0005737(cytoplasm); GO:0043229(intracellular organelle); GO:0005543(phospholipid binding); GO:0006911(phagocytosis, engulfment); GO:0060326(cell chemotaxis); GO:0071800(podosome assembly); GO:0097320(plasma membrane tubulation); GO:0001891(phagocytic cup); GO:0002102(podosome); GO:0005886(plasma membrane)	phagocytosis, engulfment; cell chemotaxis; podosome assembly; plasma membrane tubulation	protein binding; phospholipid binding	cytoplasm; intracellular organelle; phagocytic cup; podosome; plasma membrane
ENSMUSG00000070034	4.19034	1.29135	4.48848	0.034124	0.999996	13	0	224.3	5	0.467313	0	8.60865	0.249154	0.262318	4.51754	Sp110	Sp110 nuclear body protein [Source:MGI Symbol;Acc:MGI:1923364]	GO:0003677(DNA binding); GO:0005634(nucleus); GO:0009617(response to bacterium); GO:0000981(DNA-binding transcription factor activity, RNA polymerase II-specific); GO:0006357(regulation of transcription by RNA polymerase II); GO:0006915(apoptotic process); GO:0045087(innate immune response); GO:0043065(positive regulation of apoptotic process)	response to bacterium; regulation of transcription by RNA polymerase II; apoptotic process; innate immune response; positive regulation of apoptotic process	DNA binding; DNA-binding transcription factor activity, RNA polymerase II-specific	nucleus
ENSMUSG00000061132	4.17307	2.17028	6.5894	0.0102588	0.999996	21	3	419	11	0.754891	0.148999	16.0812	0.548139	0.482982	8.4104	Blnk	B cell linker [Source:MGI Symbol;Acc:MGI:96878]	GO:0005515(protein binding); GO:0005737(cytoplasm); GO:0005886(plasma membrane); GO:0035556(intracellular signal transduction); GO:0042113(B cell activation); GO:0010628(positive regulation of gene expression); GO:0007169(cell surface receptor protein tyrosine kinase signaling pathway); GO:0008289(lipid binding); GO:0019899(enzyme binding); GO:0019901(protein kinase binding); GO:0035591(signaling…	intracellular signal transduction; B cell activation; positive regulation of gene expression; cell surface receptor protein tyrosine kinase signaling pathway; B cell receptor signaling pathway	protein binding; lipid binding; enzyme binding; protein kinase binding; signaling adaptor activity; SH2 domain binding; phospholipase binding; molecular condensate scaffold activity; protein tyrosine kinase binding	cytoplasm; plasma membrane; cytosol; membrane; intracellular membrane-bounded organelle
ENSMUSG00000022372	4.15419	1.86806	6.72815	0.00949032	0.999996	19	1	326	18	0.682996	0.0496664	12.5119	0.896954	0.400892	6.79109	Sla	src-like adaptor [Source:MGI Symbol;Acc:MGI:104295]	GO:0005515(protein binding); GO:0005737(cytoplasm); GO:0005886(plasma membrane); GO:0005654(nucleoplasm); GO:0005768(endosome); GO:0007165(signal transduction); GO:0008180(COP9 signalosome); GO:0001784(phosphotyrosine residue binding); GO:0043408(regulation of MAPK cascade); GO:0005154(epidermal growth factor receptor binding)	signal transduction; regulation of MAPK cascade	protein binding; phosphotyrosine residue binding; epidermal growth factor receptor binding	cytoplasm; plasma membrane; nucleoplasm; endosome; COP9 signalosome
ENSMUSG00000055805	4.14028	3.03504	8.02877	0.00460402	0.999996	34	10	766	24	1.2222	0.496664	29.3991	1.19594	0.88797	15.3967	Fmnl1	formin-like 1 [Source:MGI Symbol;Acc:MGI:1888994]	GO:0031267(small GTPase binding); GO:0003779(actin binding); GO:0007010(cytoskeleton organization); GO:0016043(cellular component organization); GO:0030036(actin cytoskeleton organization); GO:0022604(regulation of cell morphogenesis); GO:0005829(cytosol); GO:0005737(cytoplasm); GO:0005886(plasma membrane); GO:0031410(cytoplasmic vesicle); GO:0005515(protein binding); GO:0008360(regulation of cel…	cytoskeleton organization; cellular component organization; actin cytoskeleton organization; regulation of cell morphogenesis; regulation of cell shape; cell migration; actin filament severing; cortical actin cytoskeleton organization; substrate-dependent cell migration	small GTPase binding; actin binding; protein binding; actin filament binding; profilin binding; GTPase activating protein binding	cytosol; cytoplasm; plasma membrane; cytoplasmic vesicle; phagocytic vesicle
ENSMUSG00000073490	4.12168	2.14309	7.93627	0.00484535	0.999996	20	4	401	18	0.718944	0.198666	15.3904	0.896954	0.485408	8.2347	Ifi207	interferon activated gene 207 [Source:MGI Symbol;Acc:MGI:2138302]	GO:0002218(activation of innate immune response); GO:0035458(cellular response to interferon-beta); GO:0005654(nucleoplasm); GO:0005829(cytosol); GO:0003690(double-stranded DNA binding)	activation of innate immune response; cellular response to interferon-beta	double-stranded DNA binding	nucleoplasm; cytosol
ENSMUSG00000021457	4.09676	3.31605	8.28109	0.00400601	0.999996	38	16	933	28	1.36599	0.794662	35.8086	1.39526	1.10036	18.7025	Syk	spleen tyrosine kinase [Source:MGI Symbol;Acc:MGI:99515]	GO:0005524(ATP binding); GO:0005737(cytoplasm); GO:0035556(intracellular signal transduction); GO:0004672(protein kinase activity); GO:0006468(protein phosphorylation); GO:0004713(protein tyrosine kinase activity); GO:0004715(non-membrane spanning protein tyrosine kinase activity); GO:0005634(nucleus); GO:0005515(protein binding); GO:0016020(membrane); GO:0005886(plasma membrane); GO:0002250(adap…	intracellular signal transduction; protein phosphorylation; adaptive immune response; defense response to bacterium; immune system process; G protein-coupled receptor signaling pathway; innate immune response; regulation of immune response; establishment of localization in cell; positive regulation of MAPK cascade; angiogenesis; integrin-mediated signaling pathway; positive regulation of bone res…	ATP binding; protein kinase activity; protein tyrosine kinase activity; non-membrane spanning protein tyrosine kinase activity; protein binding; signaling receptor binding; protein kinase binding; protein domain specific binding; phosphatase binding; protein serine/threonine kinase activity; ubiquitin protein ligase binding; SH2 domain binding; Toll-like receptor binding; phosphotyrosine residue …	cytoplasm; nucleus; membrane; plasma membrane; cytosol; cytoplasmic vesicle; B cell receptor complex; protein-containing complex; phagocytic vesicle; T cell receptor complex; early phagosome
ENSMUSG00000066800	4.09486	2.36076	4.71489	0.0299025	0.999996	29	1	484	8	1.04247	0.0496664	18.576	0.398646	0.59306	9.58671	Rnasel	ribonuclease L (2', 5'-oligoisoadenylate synthetase-dependent) [Source:MGI Symbol;Acc:MGI:1098272]	GO:0005524(ATP binding); GO:0005515(protein binding); GO:0004672(protein kinase activity); GO:0006468(protein phosphorylation); GO:0004540(RNA nuclease activity); GO:0006397(mRNA processing); GO:0043021(ribonucleoprotein complex binding); GO:0005737(cytoplasm); GO:0046872(metal ion binding); GO:0003723(RNA binding); GO:0005739(mitochondrion); GO:0051607(defense response to virus); GO:0004519(endo…	protein phosphorylation; mRNA processing; defense response to virus; negative regulation of viral genome replication; positive regulation of glucose import; fat cell differentiation; regulation of mRNA stability; positive regulation of transcription by RNA polymerase II; rRNA processing; RNA processing; endoplasmic reticulum unfolded protein response	ATP binding; protein binding; protein kinase activity; RNA nuclease activity; ribonucleoprotein complex binding; metal ion binding; RNA binding; endonuclease activity; rRNA binding; protein serine/threonine kinase activity; RNA endonuclease activity	cytoplasm; mitochondrion; nuclear matrix
ENSMUSG00000030047	4.08159	2.10518	6.77345	0.00925238	0.999996	20	4	398	11	0.718944	0.198666	15.2753	0.548139	0.485408	8.00656	Arhgap25	Rho GTPase activating protein 25 [Source:MGI Symbol;Acc:MGI:2443687]	GO:0007165(signal transduction); GO:0005096(GTPase activator activity); GO:0006911(phagocytosis, engulfment); GO:0007015(actin filament organization); GO:0001891(phagocytic cup); GO:0051058(negative regulation of small GTPase mediated signal transduction)	signal transduction; phagocytosis, engulfment; actin filament organization; negative regulation of small GTPase mediated signal transduction	GTPase activator activity	phagocytic cup
ENSMUSG00000048583	-4.07366	2.37946	6.45385	0.0110712	0.999996	521	8.59	20	7.16	18.7285	0.426634	0.767601	0.356788	9.69653	0.5783	Igf2	insulin-like growth factor 2 [Source:MGI Symbol;Acc:MGI:96434]	GO:0005576(extracellular region); GO:0005179(hormone activity); GO:0008083(growth factor activity); GO:0005615(extracellular space); GO:0045944(positive regulation of transcription by RNA polymerase II); GO:0005515(protein binding); GO:0045766(positive regulation of angiogenesis); GO:0051146(striated muscle cell differentiation); GO:0051781(positive regulation of cell division); GO:0048018(recept…	positive regulation of transcription by RNA polymerase II; positive regulation of angiogenesis; striated muscle cell differentiation; positive regulation of cell division; response to xenobiotic stimulus; ossification; negative regulation of transcription by RNA polymerase II; memory; response to organic cyclic compound; positive regulation of cell population proliferation; glucose metabolic proc…	hormone activity; growth factor activity; protein binding; receptor ligand activity; integrin binding; insulin-like growth factor receptor binding; transmembrane receptor protein tyrosine kinase activator activity; protein serine/threonine kinase activator activity; insulin receptor binding	extracellular region; extracellular space; collagen-containing extracellular matrix
ENSMUSG00000022371	4.07319	2.80184	7.38207	0.00658773	0.999996	34	6	645	23	1.2222	0.297998	24.7551	1.14611	0.798418	13.0477	Col14a1	collagen, type XIV, alpha 1 [Source:MGI Symbol;Acc:MGI:1341272]	GO:0005515(protein binding); GO:0048873(homeostasis of number of cells within a tissue); GO:0007155(cell adhesion); GO:0005576(extracellular region); GO:0005581(collagen trimer); GO:0031012(extracellular matrix); GO:0005614(interstitial matrix); GO:0030199(collagen fibril organization); GO:0030020(extracellular matrix structural constituent conferring tensile strength); GO:0062023(collagen-contai…	homeostasis of number of cells within a tissue; cell adhesion; collagen fibril organization; ventricular cardiac muscle tissue development; regulation of cell growth involved in cardiac muscle cell development	protein binding; extracellular matrix structural constituent conferring tensile strength	extracellular region; collagen trimer; extracellular matrix; interstitial matrix; collagen-containing extracellular matrix; extracellular space
ENSMUSG00000017737	4.06946	2.41284	3.86768	0.0492245	0.999996	28	3	511	1	1.00652	0.148999	19.6122	0.0498308	0.617672	9.93457	Mmp9	matrix metallopeptidase 9 [Source:MGI Symbol;Acc:MGI:97011]	GO:0008270(zinc ion binding); GO:0006508(proteolysis); GO:0008237(metallopeptidase activity); GO:0004222(metalloendopeptidase activity); GO:0031012(extracellular matrix); GO:0048771(tissue remodeling); GO:0045766(positive regulation of angiogenesis); GO:0006915(apoptotic process); GO:0007566(embryo implantation); GO:0044877(protein-containing complex binding); GO:0007507(heart development); GO:00…	proteolysis; tissue remodeling; positive regulation of angiogenesis; apoptotic process; embryo implantation; heart development; skeletal system development; response to xenobiotic stimulus; extracellular matrix organization; protein catabolic process; positive regulation of apoptotic process; collagen catabolic process; negative regulation of fibroblast proliferation; response to oxidative stress…	zinc ion binding; metallopeptidase activity; metalloendopeptidase activity; protein-containing complex binding; metal ion binding; peptidase activity; fibronectin binding; endopeptidase activity; identical protein binding	extracellular matrix; extracellular space; extracellular region; protein-containing complex; collagen-containing extracellular matrix
ENSMUSG00000021624	4.05608	3.05461	6.20075	0.0127696	0.999996	47	3	768	29	1.68952	0.148999	29.4759	1.44509	0.976907	15.5581	Cd180	CD180 antigen [Source:MGI Symbol;Acc:MGI:1194924]	GO:0005515(protein binding); GO:0071222(cellular response to lipopolysaccharide); GO:0005615(extracellular space); GO:0005886(plasma membrane); GO:0006954(inflammatory response); GO:0045087(innate immune response); GO:0031012(extracellular matrix); GO:0031663(lipopolysaccharide-mediated signaling pathway); GO:0031666(positive regulation of lipopolysaccharide-mediated signaling pathway); GO:000232…	cellular response to lipopolysaccharide; inflammatory response; innate immune response; lipopolysaccharide-mediated signaling pathway; positive regulation of lipopolysaccharide-mediated signaling pathway; B cell proliferation involved in immune response	protein binding	extracellular space; plasma membrane; extracellular matrix; nucleoplasm; nucleolus; mitotic spindle
ENSMUSG00000024679	4.04969	2.73652	4.31649	0.0377447	0.999996	41	0	596	37	1.47383	0	22.8745	1.84374	0.798035	12.4494	Ms4a6d	membrane-spanning 4-domains, subfamily A, member 6D [Source:MGI Symbol;Acc:MGI:1916024]	GO:0016020(membrane)			membrane
ENSMUSG00000033220	4.04854	4.06381	5.09801	0.0239533	0.999996	102	2	1557	58	3.66661	0.0993328	59.7578	2.89019	1.96957	31.4248	Rac2	Rac family small GTPase 2 [Source:MGI Symbol;Acc:MGI:97846]	GO:0003924(GTPase activity); GO:0005525(GTP binding); GO:0007264(small GTPase-mediated signal transduction); GO:0005515(protein binding); GO:0005737(cytoplasm); GO:0008283(cell population proliferation); GO:0016020(membrane); GO:0005886(plasma membrane); GO:0010592(positive regulation of lamellipodium assembly); GO:0007186(G protein-coupled receptor signaling pathway); GO:0007165(signal transduct…	small GTPase-mediated signal transduction; cell population proliferation; positive regulation of lamellipodium assembly; G protein-coupled receptor signaling pathway; signal transduction; actin filament organization; actin cytoskeleton organization; bone resorption; chemotaxis; mast cell proliferation; positive regulation of mast cell proliferation; positive regulation of neutrophil chemotaxis; c…	GTPase activity; GTP binding; protein binding; protein kinase regulator activity	cytoplasm; membrane; plasma membrane; nuclear envelope; cytosol; actin filament; lamellipodium
ENSMUSG00000021998	4.0465	5.68991	8.77697	0.00305058	0.999996	234	67	4854	160	8.41164	3.32765	186.297	7.97293	5.9211	97.2389	Lcp1	lymphocyte cytosolic protein 1 [Source:MGI Symbol;Acc:MGI:104808]	GO:0005509(calcium ion binding); GO:0046872(metal ion binding); GO:0005515(protein binding); GO:0051015(actin filament binding); GO:0051017(actin filament bundle assembly); GO:0009611(response to wounding); GO:0005737(cytoplasm); GO:0042995(cell projection); GO:0005886(plasma membrane); GO:0005829(cytosol); GO:0070161(anchoring junction); GO:0005856(cytoskeleton); GO:0003779(actin binding); GO:00…	actin filament bundle assembly; response to wounding; T cell activation involved in immune response; actin filament network formation; regulation of intracellular protein transport; protein kinase A signaling; cell migration; extracellular matrix disassembly; animal organ regeneration; positive regulation of podosome assembly	calcium ion binding; metal ion binding; protein binding; actin filament binding; actin binding; integrin binding; GTPase binding	cytoplasm; cell projection; plasma membrane; cytosol; anchoring junction; cytoskeleton; ruffle membrane; ruffle; glial cell projection; actin filament; actin cytoskeleton; phagocytic cup; actin filament bundle; stress fiber; podosome; focal adhesion; filopodium; perinuclear region of cytoplasm
ENSMUSG00000026395	4.03962	3.50107	3.33247	0.0679249	0.999996	71	0	1071	23	2.55225	0	41.105	1.14611	1.35529	21.229	Ptprc	protein tyrosine phosphatase receptor type C [Source:MGI Symbol;Acc:MGI:97810]	GO:0005515(protein binding); GO:0004725(protein tyrosine phosphatase activity); GO:0006470(protein dephosphorylation); GO:0016311(dephosphorylation); GO:0050852(T cell receptor signaling pathway); GO:0010468(regulation of gene expression); GO:0009897(external side of plasma membrane); GO:0071944(cell periphery); GO:0005886(plasma membrane); GO:0045202(synapse); GO:0045121(membrane raft); GO:00516…	protein dephosphorylation; dephosphorylation; T cell receptor signaling pathway; regulation of gene expression; defense response to virus; regulation of cell cycle; B cell proliferation; positive regulation of B cell proliferation; positive regulation of MAPK cascade; B cell differentiation; release of sequestered calcium ion into cytosol; gamma-delta T cell differentiation; positive thymic T cel…	protein binding; protein tyrosine phosphatase activity; phosphoprotein phosphatase activity; protein kinase binding; heparin binding; signaling receptor binding; heparan sulfate proteoglycan binding; ankyrin binding; spectrin binding	external side of plasma membrane; cell periphery; plasma membrane; synapse; membrane raft; focal adhesion; cell surface; cytoplasmic side of plasma membrane; membrane microdomain; bleb; membrane
ENSMUSG00000091736	4.03213	0.0543661	10.9775	0.000922267	0.87079	5.41	0	72.07	15.97	0.194474	0	2.76605	0.795798	0.11103	1.82263	Yy2	Yy2 transcription factor [Source:MGI Symbol;Acc:MGI:3837947]	GO:0005634(nucleus); GO:0046872(metal ion binding); GO:0003677(DNA binding); GO:0000978(RNA polymerase II cis-regulatory region sequence-specific DNA binding); GO:0000981(DNA-binding transcription factor activity, RNA polymerase II-specific); GO:0006357(regulation of transcription by RNA polymerase II); GO:0005667(transcription regulator complex); GO:0000785(chromatin); GO:0000987(cis-regulatory …	regulation of transcription by RNA polymerase II	metal ion binding; DNA binding; RNA polymerase II cis-regulatory region sequence-specific DNA binding; DNA-binding transcription factor activity, RNA polymerase II-specific; cis-regulatory region sequence-specific DNA binding	nucleus; transcription regulator complex; chromatin; PcG protein complex
ENSMUSG00000069792	4.02678	2.36955	4.31016	0.0378855	0.999996	32	0	464	25	1.15031	0	17.8083	1.24577	0.628311	9.61738	Wfdc17	WAP four-disulfide core domain 17 [Source:MGI Symbol;Acc:MGI:3649773]	GO:0005576(extracellular region); GO:0030414(peptidase inhibitor activity); GO:0005615(extracellular space); GO:0019731(antibacterial humoral response); GO:0004867(serine-type endopeptidase inhibitor activity); GO:0045087(innate immune response)	antibacterial humoral response; innate immune response	peptidase inhibitor activity; serine-type endopeptidase inhibitor activity	extracellular region; extracellular space
ENSMUSG00000015852	4.02535	5.16017	2.9385	0.0864911	0.999996	229	0	3393	82	8.2319	0	130.224	4.08613	4.22704	67.2608	Fcrl2	Fc receptor like 2 [Source:MGI Symbol;Acc:MGI:1933397]	GO:0016020(membrane); GO:0007166(cell surface receptor signaling pathway); GO:0006955(immune response); GO:0009897(external side of plasma membrane); GO:0004888(transmembrane signaling receptor activity)	cell surface receptor signaling pathway; immune response	transmembrane signaling receptor activity	membrane; external side of plasma membrane
ENSMUSG00000054404	4.02283	1.6086	7.96707	0.00476361	0.999996	13	4	273	12	0.467313	0.198666	10.4778	0.59797	0.34829	5.62479	Slfn5	schlafen 5 [Source:MGI Symbol;Acc:MGI:1329004]	GO:0005634(nucleus); GO:0005524(ATP binding); GO:0030154(cell differentiation)	cell differentiation	ATP binding	nucleus
ENSMUSG00000019122	4.02188	2.61996	5.39991	0.0201378	0.999996	37	1	560	25	1.33005	0.0496664	21.4928	1.24577	0.74472	11.4632	Ccl9	C-C motif chemokine ligand 9 [Source:MGI Symbol;Acc:MGI:104533]	GO:0005576(extracellular region); GO:0006955(immune response); GO:0008009(chemokine activity); GO:0005615(extracellular space); GO:0005125(cytokine activity); GO:0007165(signal transduction); GO:0006935(chemotaxis); GO:0060326(cell chemotaxis); GO:0006954(inflammatory response); GO:0061844(antimicrobial humoral immune response mediated by antimicrobial peptide); GO:0048020(CCR chemokine receptor …	immune response; signal transduction; chemotaxis; cell chemotaxis; inflammatory response; antimicrobial humoral immune response mediated by antimicrobial peptide; positive regulation of cell migration; eosinophil chemotaxis; chemokine-mediated signaling pathway; positive regulation of osteoclast differentiation; negative regulation of myoblast differentiation	chemokine activity; cytokine activity; CCR chemokine receptor binding	extracellular region; extracellular space
ENSMUSG00000026288	4.01678	3.78039	7.33862	0.00674888	0.999996	67	15	1292	35	2.40846	0.744996	49.587	1.74408	1.62276	25.7683	Inpp5d	inositol polyphosphate-5-phosphatase D [Source:MGI Symbol;Acc:MGI:107357]	GO:0016791(phosphatase activity); GO:0046856(phosphatidylinositol dephosphorylation); GO:0005515(protein binding); GO:0008340(determination of adult lifespan); GO:0006629(lipid metabolic process); GO:0005737(cytoplasm); GO:0005886(plasma membrane); GO:0016064(immunoglobulin mediated immune response); GO:0004445(inositol-polyphosphate 5-phosphatase activity); GO:0052658(inositol-1,4,5-trisphosphat…	phosphatidylinositol dephosphorylation; determination of adult lifespan; lipid metabolic process; immunoglobulin mediated immune response; immune system process; apoptotic process; intracellular signal transduction; negative regulation of interleukin-6 production; positive regulation of apoptotic process; negative regulation of B cell proliferation; negative regulation of osteoclast differentiati…	phosphatase activity; protein binding; inositol-polyphosphate 5-phosphatase activity; inositol-1,4,5-trisphosphate 5-phosphatase activity; inositol-1,3,4,5-tetrakisphosphate 5-phosphatase activity; hydrolase activity; SH3 domain binding; phosphatidylinositol-3,4,5-trisphosphate 5-phosphatase activity; phosphatidylinositol-4,5-bisphosphate 5-phosphatase activity; inositol-4,5-bisphosphate 5-phosph…	cytoplasm; plasma membrane; cytosol; membrane raft; cytoskeleton; cortical cytoskeleton; actin filament
ENSMUSG00000069892	3.99747	2.21903	7.55856	0.00597256	0.999996	24.23	3.64	417.22	22	0.871	0.180786	16.0129	1.09628	0.559342	8.64425	9930111J21Rik2	RIKEN cDNA 9930111J21 gene 2 [Source:MGI Symbol;Acc:MGI:3711310]	GO:0016020(membrane); GO:0005525(GTP binding); GO:0016787(hydrolase activity); GO:0000045(autophagosome assembly); GO:0003924(GTPase activity); GO:0035458(cellular response to interferon-beta); GO:0045087(innate immune response); GO:0005789(endoplasmic reticulum membrane)	autophagosome assembly; cellular response to interferon-beta; innate immune response	GTP binding; hydrolase activity; GTPase activity	membrane; endoplasmic reticulum membrane
ENSMUSG00000040528	3.98112	1.68055	3.89087	0.0485494	0.999996	20	0	294	7	0.718944	0	11.2837	0.348816	0.398771	5.90847	Milr1	mast cell immunoglobulin like receptor 1 [Source:MGI Symbol;Acc:MGI:2685731]	GO:0005886(plasma membrane); GO:0005576(extracellular region); GO:0005515(protein binding); GO:0043303(mast cell degranulation); GO:0033004(negative regulation of mast cell activation); GO:0016020(membrane)	mast cell degranulation; negative regulation of mast cell activation	protein binding	plasma membrane; extracellular region; membrane
ENSMUSG00000035493	3.95076	3.04254	4.52252	0.0334514	0.999996	53	1	768	21	1.9052	0.0496664	29.4759	1.04645	1.04441	15.3614	Tgfbi	transforming growth factor, beta induced [Source:MGI Symbol;Acc:MGI:99959]	GO:0007155(cell adhesion); GO:0005515(protein binding); GO:0005615(extracellular space); GO:0005576(extracellular region); GO:0031012(extracellular matrix); GO:0050839(cell adhesion molecule binding); GO:0030198(extracellular matrix organization); GO:0005518(collagen binding); GO:0042802(identical protein binding); GO:0001525(angiogenesis); GO:0002062(chondrocyte differentiation); GO:0005604(base…	cell adhesion; extracellular matrix organization; angiogenesis; chondrocyte differentiation	protein binding; cell adhesion molecule binding; collagen binding; identical protein binding; extracellular matrix structural constituent; extracellular matrix binding	extracellular space; extracellular region; extracellular matrix; basement membrane; trans-Golgi network; collagen-containing extracellular matrix
ENSMUSG00000024066	3.93103	2.64163	5.77265	0.0162775	0.999996	40	1	546	41.29	1.43789	0.0496664	20.9555	2.05751	0.801233	11.5932	Xdh	xanthine dehydrogenase [Source:MGI Symbol;Acc:MGI:98973]	GO:0016491(oxidoreductase activity); GO:0005506(iron ion binding); GO:0046872(metal ion binding); GO:0050660(flavin adenine dinucleotide binding); GO:0051536(iron-sulfur cluster binding); GO:0051537(2 iron, 2 sulfur cluster binding); GO:0071949(FAD binding); GO:0030151(molybdenum ion binding); GO:0004854(xanthine dehydrogenase activity); GO:0043546(molybdopterin cofactor binding); GO:0005515(prot…	lactation; allantoin metabolic process; AMP catabolic process; IMP catabolic process; amide catabolic process; dGMP catabolic process; dAMP catabolic process; iron-sulfur cluster assembly; adenosine catabolic process; deoxyadenosine catabolic process; guanine catabolic process; inosine catabolic process; deoxyinosine catabolic process; deoxyguanosine catabolic process; hypoxanthine catabolic proc…	oxidoreductase activity; iron ion binding; metal ion binding; flavin adenine dinucleotide binding; iron-sulfur cluster binding; 2 iron, 2 sulfur cluster binding; FAD binding; molybdenum ion binding; xanthine dehydrogenase activity; molybdopterin cofactor binding; protein binding; identical protein binding; nitrite reductase (NO-forming) activity; xanthine oxidase activity; protein homodimerizatio…	cytosol; cytoplasm; extracellular space; extracellular region; peroxisome; sarcoplasmic reticulum
ENSMUSG00000053158	3.90913	2.52978	5.65252	0.0174303	0.999996	36	2	526	21	1.2941	0.0993328	20.1879	1.04645	0.747812	10.7117	Fes	feline sarcoma oncogene [Source:MGI Symbol;Acc:MGI:95514]	GO:0008289(lipid binding); GO:0005524(ATP binding); GO:0004672(protein kinase activity); GO:0006468(protein phosphorylation); GO:0004713(protein tyrosine kinase activity); GO:0004715(non-membrane spanning protein tyrosine kinase activity); GO:0018108(peptidyl-tyrosine phosphorylation); GO:0005737(cytoplasm); GO:0005794(Golgi apparatus); GO:0005886(plasma membrane); GO:0005829(cytosol); GO:0031410…	protein phosphorylation; peptidyl-tyrosine phosphorylation; regulation of cell shape; cell adhesion; regulation of cell differentiation; positive regulation of neuron projection development; regulation of cell population proliferation; regulation of cell motility; microtubule bundle formation; regulation of cell adhesion; positive regulation of microtubule polymerization; chemotaxis; centrosome c…	lipid binding; ATP binding; protein kinase activity; protein tyrosine kinase activity; non-membrane spanning protein tyrosine kinase activity; protein binding; microtubule binding; phosphatidylinositol binding; immunoglobulin receptor binding	cytoplasm; Golgi apparatus; plasma membrane; cytosol; cytoplasmic vesicle; microtubule cytoskeleton; anchoring junction; cytoskeleton; focal adhesion; cytoplasmic side of plasma membrane
ENSMUSG00000025161	3.8885	2.17683	6.53867	0.0105554	0.999996	25	4	411	15	0.89868	0.198666	15.7742	0.747462	0.58206	8.35398	Slc16a3	solute carrier family 16 (monocarboxylic acid transporters), member 3 [Source:MGI Symbol;Acc:MGI:1933438]	GO:0016020(membrane); GO:0022857(transmembrane transporter activity); GO:0055085(transmembrane transport); GO:0008028(monocarboxylic acid transmembrane transporter activity); GO:0015718(monocarboxylic acid transport); GO:0005886(plasma membrane); GO:0015293(symporter activity); GO:0016323(basolateral plasma membrane); GO:0016328(lateral plasma membrane); GO:0098839(postsynaptic density membrane);…	transmembrane transport; monocarboxylic acid transport; lactate transmembrane transport; plasma membrane lactate transport; pyruvate transmembrane transport; pyruvate catabolic process	transmembrane transporter activity; monocarboxylic acid transmembrane transporter activity; symporter activity; pyruvate transmembrane transporter activity; lactate transmembrane transporter activity; lactate:proton symporter activity	membrane; plasma membrane; basolateral plasma membrane; lateral plasma membrane; postsynaptic density membrane; parallel fiber to Purkinje cell synapse; apical plasma membrane; nuclear membrane
ENSMUSG00000037860	3.85863	1.15938	6.34767	0.0117536	0.999996	12	2	198	7	0.431366	0.0993328	7.59925	0.348816	0.285303	4.05806	Aim2	absent in melanoma 2 [Source:MGI Symbol;Acc:MGI:2686159]	GO:0002218(activation of innate immune response); GO:0035458(cellular response to interferon-beta); GO:0005515(protein binding); GO:0005737(cytoplasm); GO:0071466(cellular response to xenobiotic stimulus); GO:0005634(nucleus); GO:0003677(DNA binding); GO:0005654(nucleoplasm); GO:0005829(cytosol); GO:0006954(inflammatory response); GO:0045087(innate immune response); GO:0006974(DNA damage response…	activation of innate immune response; cellular response to interferon-beta; cellular response to xenobiotic stimulus; inflammatory response; innate immune response; DNA damage response; pattern recognition receptor signaling pathway; positive regulation of interleukin-1 beta production; positive regulation of inflammatory response; pyroptosis; brain development; negative regulation of phosphatidy…	protein binding; DNA binding; double-stranded DNA binding; cysteine-type endopeptidase activator activity; identical protein binding; signaling adaptor activity; pattern recognition receptor activity	cytoplasm; nucleus; nucleoplasm; cytosol; canonical inflammasome complex; site of double-strand break; AIM2 inflammasome complex; mitochondrion
ENSMUSG00000024261	-3.83598	2.83818	6.86917	0.00876952	0.999996	708	16	23	19	25.4506	0.794662	0.882741	0.946785	13.2426	0.91272	Syt4	synaptotagmin IV [Source:MGI Symbol;Acc:MGI:101759]	GO:0016020(membrane); GO:0030424(axon); GO:0046872(metal ion binding); GO:0005886(plasma membrane); GO:0005509(calcium ion binding); GO:0031410(cytoplasmic vesicle); GO:0030154(cell differentiation); GO:0098978(glutamatergic synapse); GO:0043025(neuronal cell body); GO:0001786(phosphatidylserine binding); GO:0045202(synapse); GO:0005794(Golgi apparatus); GO:0000149(SNARE binding); GO:0048471(peri…	cell differentiation; vesicle fusion; dense core granule cytoskeletal transport; neurotransmitter secretion; regulation of vesicle fusion; regulation of dopamine secretion; negative regulation of vesicle fusion; negative regulation of calcium ion-dependent exocytosis; regulation of endocytosis; memory; positive regulation of glutamate secretion; regulation of calcium ion-dependent exocytosis; neg…	metal ion binding; calcium ion binding; phosphatidylserine binding; SNARE binding; protein heterodimerization activity; protein homodimerization activity; clathrin binding; syntaxin binding; syntaxin-1 binding; calcium-dependent phospholipid binding; syntaxin-3 binding	membrane; axon; plasma membrane; cytoplasmic vesicle; glutamatergic synapse; neuronal cell body; synapse; Golgi apparatus; perinuclear region of cytoplasm; secretory granule membrane; neuron projection; exocytic vesicle; neuron projection terminus; astrocyte projection; dense core granule; neuronal dense core vesicle; dendrite; neuronal dense core vesicle membrane; vesicle; somatodendritic compar…
ENSMUSG00000003206	3.83472	1.22757	7.26142	0.00704516	0.999996	13	2	202	12	0.467313	0.0993328	7.75277	0.59797	0.305061	4.25511	Ebi3	Epstein-Barr virus induced gene 3 [Source:MGI Symbol;Acc:MGI:1354171]	GO:0005515(protein binding); GO:0016020(membrane); GO:0004896(cytokine receptor activity); GO:0009897(external side of plasma membrane); GO:0005576(extracellular region); GO:0005125(cytokine activity); GO:0019221(cytokine-mediated signaling pathway); GO:0005615(extracellular space); GO:0043235(receptor complex); GO:0019955(cytokine binding); GO:0045523(interleukin-27 receptor binding); GO:0042098…	cytokine-mediated signaling pathway; T cell proliferation	protein binding; cytokine receptor activity; cytokine activity; cytokine binding; interleukin-27 receptor binding	membrane; external side of plasma membrane; extracellular region; extracellular space; receptor complex
ENSMUSG00000071714	3.8276	1.02038	5.03005	0.0249112	0.999996	13.52	0	171.51	12	0.486006	0	6.58256	0.59797	0.27254	3.66561	Csf2rb2	colony stimulating factor 2 receptor, beta 2, low-affinity (granulocyte-macrophage) [Source:MGI Symbol;Acc:MGI:1339760]	GO:0005515(protein binding); GO:0016020(membrane); GO:0004896(cytokine receptor activity); GO:0019221(cytokine-mediated signaling pathway); GO:0016064(immunoglobulin mediated immune response); GO:0009897(external side of plasma membrane); GO:0005886(plasma membrane)	cytokine-mediated signaling pathway; immunoglobulin mediated immune response	protein binding; cytokine receptor activity	membrane; external side of plasma membrane; plasma membrane
ENSMUSG00000042644	3.82503	1.63607	7.33451	0.0067643	0.999996	16	4	275	13	0.575155	0.198666	10.5545	0.6478	0.40735	5.6875	Itpr3	inositol 1,4,5-triphosphate receptor 3 [Source:MGI Symbol;Acc:MGI:96624]	GO:0016020(membrane); GO:0055085(transmembrane transport); GO:0006811(monoatomic ion transport); GO:0005262(calcium channel activity); GO:0070588(calcium ion transmembrane transport); GO:0005783(endoplasmic reticulum); GO:0006816(calcium ion transport); GO:0005216(monoatomic ion channel activity); GO:0070679(inositol 1,4,5 trisphosphate binding); GO:0005220(inositol 1,4,5-trisphosphate-gated calc…	transmembrane transport; monoatomic ion transport; calcium ion transmembrane transport; calcium ion transport; long-term synaptic potentiation; cellular response to cAMP; G protein-coupled receptor signaling pathway; positive regulation of cytosolic calcium ion concentration; calcium-mediated signaling; memory; calcium ion homeostasis; protein homotetramerization; release of sequestered calcium i…	calcium channel activity; monoatomic ion channel activity; inositol 1,4,5 trisphosphate binding; inositol 1,4,5-trisphosphate-gated calcium channel activity; protein binding; protein-containing complex binding; metal ion binding; calcium ion binding; ATP binding; identical protein binding; phosphatidylinositol binding; inositol 1,3,4,5 tetrakisphosphate binding; intracellularly gated calcium chan…	membrane; endoplasmic reticulum; nucleus; nucleolus; cytoplasm; nucleoplasm; plasma membrane; endoplasmic reticulum membrane; cytoplasmic vesicle; apical plasma membrane; apical part of cell; neuronal cell body; dendrite; perinuclear region of cytoplasm; transport vesicle membrane; presynapse; cytoplasmic side of endoplasmic reticulum membrane; receptor complex; brush border; nuclear envelope; sa…
ENSMUSG00000039997	3.82434	1.12917	6.55629	0.0104514	0.999996	12	2	191.94	8	0.431366	0.0993328	7.36667	0.398646	0.285303	3.96496	Ifi203	interferon activated gene 203 [Source:MGI Symbol;Acc:MGI:96428]	GO:0002218(activation of innate immune response); GO:0035458(cellular response to interferon-beta)	activation of innate immune response; cellular response to interferon-beta
ENSMUSG00000048779	3.81115	3.04861	6.24957	0.0124224	0.999996	42	13	773	16	1.50978	0.645663	29.6678	0.797293	1.1079	15.3345	P2ry6	pyrimidinergic receptor P2Y, G-protein coupled, 6 [Source:MGI Symbol;Acc:MGI:2673874]	GO:0004930(G protein-coupled receptor activity); GO:0007186(G protein-coupled receptor signaling pathway); GO:0016020(membrane); GO:0045028(G protein-coupled purinergic nucleotide receptor activity); GO:0005886(plasma membrane); GO:0016324(apical plasma membrane); GO:0006909(phagocytosis); GO:0035589(G protein-coupled purinergic nucleotide receptor signaling pathway); GO:0016323(basolateral plasm…	G protein-coupled receptor signaling pathway; phagocytosis; G protein-coupled purinergic nucleotide receptor signaling pathway; cellular response to organic cyclic compound; positive regulation of smooth muscle cell migration; cellular response to prostaglandin E stimulus; transepithelial chloride transport; positive regulation of inositol trisphosphate biosynthetic process; positive regulation o…	G protein-coupled receptor activity; G protein-coupled purinergic nucleotide receptor activity; pyrimidine nucleotide binding; G protein-coupled ADP receptor activity; G protein-coupled UDP receptor activity; G protein-coupled UTP receptor activity	membrane; plasma membrane; apical plasma membrane; basolateral plasma membrane
ENSMUSG00000020437	3.80278	1.47823	4.95626	0.0259964	0.999996	18	1	251	7	0.647049	0.0496664	9.6334	0.348816	0.381469	5.08026	Myo1g	myosin IG [Source:MGI Symbol;Acc:MGI:1927091]	GO:0005524(ATP binding); GO:0003774(cytoskeletal motor activity); GO:0016459(myosin complex); GO:0042995(cell projection); GO:0005886(plasma membrane); GO:0002250(adaptive immune response); GO:0030027(lamellipodium); GO:0030175(filopodium); GO:0005737(cytoplasm); GO:0008289(lipid binding); GO:0003779(actin binding); GO:0005516(calmodulin binding); GO:0006909(phagocytosis); GO:0051649(establishmen…	adaptive immune response; phagocytosis; establishment of localization in cell; actin filament organization; exocytosis; endocytosis; cell-substrate adhesion; actin filament-based movement; cell gliding; T cell meandering migration; T cell mediated immunity; Fc-gamma receptor signaling pathway involved in phagocytosis	ATP binding; cytoskeletal motor activity; lipid binding; actin binding; calmodulin binding; actin filament binding; microfilament motor activity; phosphatidylinositol-4,5-bisphosphate binding; phosphatidylinositol-3,4,5-trisphosphate binding; phosphatidylinositol-3,4-bisphosphate binding	myosin complex; cell projection; plasma membrane; lamellipodium; filopodium; cytoplasm; microvillus; actin cytoskeleton; phagocytic cup; leading edge membrane; nucleoplasm
ENSMUSG00000020399	3.79978	1.16322	4.50477	0.0338004	0.999996	14	1	203	3	0.503261	0.0496664	7.79115	0.149492	0.3033	4.05887	Havcr2	hepatitis A virus cellular receptor 2 [Source:MGI Symbol;Acc:MGI:2159682]	GO:0016020(membrane); GO:0046872(metal ion binding); GO:0002250(adaptive immune response); GO:0006357(regulation of transcription by RNA polymerase II); GO:0005576(extracellular region); GO:0070161(anchoring junction); GO:0005515(protein binding); GO:0001819(positive regulation of cytokine production); GO:0006954(inflammatory response); GO:0045087(innate immune response); GO:0005769(early endosom…	adaptive immune response; regulation of transcription by RNA polymerase II; positive regulation of cytokine production; inflammatory response; innate immune response; positive regulation of tumor necrosis factor production; positive regulation of chemokine production; positive regulation of ERK1 and ERK2 cascade; positive regulation of innate immune response; negative regulation of T cell prolife…	metal ion binding; protein binding	membrane; extracellular region; anchoring junction; early endosome; cell surface; plasma membrane; immunological synapse; mediator complex
ENSMUSG00000008496	3.79512	1.81687	3.78674	0.0516602	0.999996	25	0	316	12	0.89868	0	12.1281	0.59797	0.494966	6.45303	Pou2f2	POU domain, class 2, transcription factor 2 [Source:MGI Symbol;Acc:MGI:101897]	GO:0003677(DNA binding); GO:0006355(regulation of DNA-templated transcription); GO:0005634(nucleus); GO:0003700(DNA-binding transcription factor activity); GO:0000981(DNA-binding transcription factor activity, RNA polymerase II-specific); GO:0043565(sequence-specific DNA binding); GO:0045944(positive regulation of transcription by RNA polymerase II); GO:0005737(cytoplasm); GO:0000978(RNA polymera…	regulation of DNA-templated transcription; positive regulation of transcription by RNA polymerase II; regulation of transcription by RNA polymerase II; positive regulation of DNA-templated transcription; positive regulation of interleukin-6 production; cell maturation; cellular response to virus; spermidine transport; spermidine transmembrane transport; mature B cell differentiation	DNA binding; DNA-binding transcription factor activity; DNA-binding transcription factor activity, RNA polymerase II-specific; sequence-specific DNA binding; RNA polymerase II cis-regulatory region sequence-specific DNA binding; protein domain specific binding; transcription cis-regulatory region binding; DNA-binding transcription activator activity, RNA polymerase II-specific; spermidine transme…	nucleus; cytoplasm; nucleoplasm; intracellular membrane-bounded organelle
ENSMUSG00000045551	3.79066	1.96854	3.79274	0.0514753	0.999996	28	0	350	15	1.00652	0	13.433	0.747462	0.552282	7.18033	Fpr1	formyl peptide receptor 1 [Source:MGI Symbol;Acc:MGI:107443]	GO:0004930(G protein-coupled receptor activity); GO:0007186(G protein-coupled receptor signaling pathway); GO:0016020(membrane); GO:0005737(cytoplasm); GO:0005886(plasma membrane); GO:0006935(chemotaxis); GO:0007204(positive regulation of cytosolic calcium ion concentration); GO:0007200(phospholipase C-activating G protein-coupled receptor signaling pathway); GO:0004875(complement receptor activi…	G protein-coupled receptor signaling pathway; chemotaxis; positive regulation of cytosolic calcium ion concentration; phospholipase C-activating G protein-coupled receptor signaling pathway; complement receptor mediated signaling pathway; inflammatory response	G protein-coupled receptor activity; complement receptor activity; N-formyl peptide receptor activity; RAGE receptor binding; G protein-coupled receptor binding; scavenger receptor binding	membrane; cytoplasm; plasma membrane
ENSMUSG00000004837	3.78753	1.23381	5.74053	0.0165778	0.999996	3	10	210	6	0.107842	0.496664	8.05981	0.298985	0.278751	4.26571	Grap	GRB2-related adaptor protein [Source:MGI Symbol;Acc:MGI:1918770]	GO:0005515(protein binding); GO:0016020(membrane); GO:0005886(plasma membrane); GO:0005654(nucleoplasm); GO:0045202(synapse); GO:0005737(cytoplasm); GO:0007165(signal transduction); GO:0098793(presynapse); GO:0007605(sensory perception of sound); GO:0008180(COP9 signalosome); GO:0001784(phosphotyrosine residue binding); GO:0043408(regulation of MAPK cascade); GO:0005154(epidermal growth factor re…	signal transduction; sensory perception of sound; regulation of MAPK cascade	protein binding; phosphotyrosine residue binding; epidermal growth factor receptor binding	membrane; plasma membrane; nucleoplasm; synapse; cytoplasm; presynapse; COP9 signalosome
ENSMUSG00000029304	3.77935	7.41383	8.15052	0.00430489	0.999996	1078	151	15420	874	38.7511	7.49962	591.819	43.5521	23.2144	317.784	Spp1	secreted phosphoprotein 1 [Source:MGI Symbol;Acc:MGI:98389]	GO:0007155(cell adhesion); GO:0001503(ossification); GO:0005576(extracellular region); GO:0005178(integrin binding); GO:0006710(androgen catabolic process); GO:0033280(response to vitamin D); GO:0045893(positive regulation of DNA-templated transcription); GO:0071394(cellular response to testosterone stimulus); GO:2000866(positive regulation of estradiol secretion); GO:0005615(extracellular space)…	cell adhesion; ossification; androgen catabolic process; response to vitamin D; positive regulation of DNA-templated transcription; cellular response to testosterone stimulus; positive regulation of estradiol secretion; cellular response to leukemia inhibitory factor; osteoblast differentiation; signal transduction; calcium ion homeostasis; intracellular calcium ion homeostasis; neutrophil chemot…	integrin binding; cytokine activity; extracellular matrix binding	extracellular region; extracellular space; Golgi apparatus; cytoplasm; apical part of cell; perinuclear region of cytoplasm; cell projection; vesicle
ENSMUSG00000052821	3.7452	0.367291	9.6146	0.00193037	0.999996	6	2	101	11	0.215683	0.0993328	3.87639	0.548139	0.165321	2.27266	Cysltr1	cysteinyl leukotriene receptor 1 [Source:MGI Symbol;Acc:MGI:1926218]	GO:0004930(G protein-coupled receptor activity); GO:0007186(G protein-coupled receptor signaling pathway); GO:0016020(membrane); GO:0004974(leukotriene receptor activity); GO:0045766(positive regulation of angiogenesis); GO:0002437(inflammatory response to antigenic stimulus); GO:0005886(plasma membrane); GO:0005515(protein binding); GO:0051649(establishment of localization in cell); GO:0006816(c…	G protein-coupled receptor signaling pathway; positive regulation of angiogenesis; inflammatory response to antigenic stimulus; establishment of localization in cell; calcium ion transport; leukotriene signaling pathway; cell surface receptor signaling pathway; chemotaxis; neuropeptide signaling pathway; positive regulation of vasoconstriction; positive regulation of glial cell proliferation; cel…	G protein-coupled receptor activity; leukotriene receptor activity; protein binding; G protein-coupled peptide receptor activity; cysteinyl leukotriene receptor activity	membrane; plasma membrane
ENSMUSG00000020227	3.74062	1.55595	8.1218	0.00437362	0.999996	8	10	255	15	0.287577	0.496664	9.78692	0.747462	0.380523	5.35023	Irak3	interleukin-1 receptor-associated kinase 3 [Source:MGI Symbol;Acc:MGI:1921164]	GO:0005524(ATP binding); GO:0005515(protein binding); GO:0007165(signal transduction); GO:0004672(protein kinase activity); GO:0006468(protein phosphorylation); GO:0006915(apoptotic process); GO:0042981(regulation of apoptotic process); GO:0005634(nucleus); GO:0005737(cytoplasm); GO:0005886(plasma membrane); GO:0004674(protein serine/threonine kinase activity); GO:0016301(kinase activity); GO:003…	signal transduction; protein phosphorylation; apoptotic process; regulation of apoptotic process; intracellular signal transduction; cytokine-mediated signaling pathway; positive regulation of cytokine production; cellular response to lipopolysaccharide; Toll signaling pathway; negative regulation of MAP kinase activity; response to lipopolysaccharide; negative regulation of interleukin-6 product…	ATP binding; protein binding; protein kinase activity; protein serine/threonine kinase activity; kinase activity; magnesium ion binding; protein homodimerization activity; protein kinase binding; protein heterodimerization activity	nucleus; cytoplasm; plasma membrane
ENSMUSG00000048163	3.73521	2.4123	3.20742	0.0733049	0.999996	40	0	488	13	1.43789	0	18.7295	0.6478	0.779255	9.78568	Selplg	selectin, platelet (p-selectin) ligand [Source:MGI Symbol;Acc:MGI:106689]	GO:0016020(membrane)			membrane
ENSMUSG00000032698	3.70623	3.09092	5.57136	0.0182566	0.999996	55	8	789	19	1.9771	0.397331	30.2819	0.946785	1.23894	15.7155	Lmo2	LIM domain only 2 [Source:MGI Symbol;Acc:MGI:102811]	GO:0005634(nucleus); GO:0046872(metal ion binding); GO:0045944(positive regulation of transcription by RNA polymerase II); GO:0005515(protein binding); GO:0003682(chromatin binding); GO:0003677(DNA binding); GO:0032991(protein-containing complex); GO:0003713(transcription coactivator activity); GO:0035162(embryonic hemopoiesis); GO:0140297(DNA-binding transcription factor binding); GO:0045647(neg…	positive regulation of transcription by RNA polymerase II; embryonic hemopoiesis; negative regulation of erythrocyte differentiation	metal ion binding; protein binding; chromatin binding; DNA binding; transcription coactivator activity; DNA-binding transcription factor binding; transcription coregulator binding; bHLH transcription factor binding; RNA polymerase II-specific DNA-binding transcription factor binding	nucleus; protein-containing complex; transcription regulator complex
ENSMUSG00000040751	3.69986	2.6731	6.07834	0.013685	0.999996	41	6	579	21	1.47383	0.297998	22.2221	1.04645	0.931048	11.7304	Lat2	linker for activation of T cells family, member 2 [Source:MGI Symbol;Acc:MGI:1926479]	GO:0002764(immune response-regulating signaling pathway); GO:0042113(B cell activation); GO:0005886(plasma membrane); GO:0002250(adaptive immune response); GO:0043303(mast cell degranulation); GO:0019722(calcium-mediated signaling); GO:0035556(intracellular signal transduction); GO:0050853(B cell receptor signaling pathway); GO:0045121(membrane raft); GO:0042169(SH2 domain binding)	immune response-regulating signaling pathway; B cell activation; adaptive immune response; mast cell degranulation; calcium-mediated signaling; intracellular signal transduction; B cell receptor signaling pathway	SH2 domain binding	plasma membrane; membrane raft
ENSMUSG00000031506	3.69359	2.00173	6.50535	0.010755	0.999996	21	7	361	12	0.754891	0.347665	13.8552	0.59797	0.570853	7.31914	Ptpn7	protein tyrosine phosphatase, non-receptor type 7 [Source:MGI Symbol;Acc:MGI:2156893]	GO:0004725(protein tyrosine phosphatase activity); GO:0006470(protein dephosphorylation); GO:0016311(dephosphorylation); GO:0005737(cytoplasm); GO:0005856(cytoskeleton); GO:0004721(phosphoprotein phosphatase activity); GO:0005829(cytosol); GO:0009898(cytoplasmic side of plasma membrane); GO:0015630(microtubule cytoskeleton); GO:0072686(mitotic spindle)	protein dephosphorylation; dephosphorylation	protein tyrosine phosphatase activity; phosphoprotein phosphatase activity	cytoplasm; cytoskeleton; cytosol; cytoplasmic side of plasma membrane; microtubule cytoskeleton; mitotic spindle
ENSMUSG00000041515	3.6901	3.04683	6.0559	0.0138599	0.999996	55	7	752	28	1.9771	0.347665	28.8618	1.39526	1.21631	15.2262	Irf8	interferon regulatory factor 8 [Source:MGI Symbol;Acc:MGI:96395]	GO:0006355(regulation of DNA-templated transcription); GO:0005515(protein binding); GO:0003700(DNA-binding transcription factor activity); GO:0000976(transcription cis-regulatory region binding); GO:0045893(positive regulation of DNA-templated transcription); GO:0006357(regulation of transcription by RNA polymerase II); GO:0071222(cellular response to lipopolysaccharide); GO:0005634(nucleus); GO:…	regulation of DNA-templated transcription; positive regulation of DNA-templated transcription; regulation of transcription by RNA polymerase II; cellular response to lipopolysaccharide; response to bacterium; positive regulation of type II interferon production; negative regulation of transcription by RNA polymerase II; myeloid cell differentiation; autophagy; phagocytosis; defense response to ba…	protein binding; DNA-binding transcription factor activity; transcription cis-regulatory region binding; DNA binding; RNA polymerase II cis-regulatory region sequence-specific DNA binding; DNA-binding transcription factor activity, RNA polymerase II-specific; RNA polymerase II transcription regulatory region sequence-specific DNA binding; DNA-binding transcription repressor activity, RNA polymera…	nucleus; cytoplasm; nucleoplasm
ENSMUSG00000042190	3.68975	1.57626	6.17806	0.0129344	0.999996	17	4	266	9	0.611102	0.198666	10.2091	0.448477	0.426934	5.4175	Cmklr1	chemerin chemokine-like receptor 1 [Source:MGI Symbol;Acc:MGI:109603]	GO:0004930(G protein-coupled receptor activity); GO:0007186(G protein-coupled receptor signaling pathway); GO:0016020(membrane); GO:0005886(plasma membrane); GO:0007204(positive regulation of cytosolic calcium ion concentration); GO:0120162(positive regulation of cold-induced thermogenesis); GO:0045600(positive regulation of fat cell differentiation); GO:0007200(phospholipase C-activating G prote…	G protein-coupled receptor signaling pathway; positive regulation of cytosolic calcium ion concentration; positive regulation of cold-induced thermogenesis; positive regulation of fat cell differentiation; phospholipase C-activating G protein-coupled receptor signaling pathway; negative regulation of NF-kappaB transcription factor activity; complement receptor mediated signaling pathway; inflamma…	G protein-coupled receptor activity; complement receptor activity; adipokinetic hormone receptor activity; adipokinetic hormone binding	membrane; plasma membrane
ENSMUSG00000064267	3.68176	2.90199	6.67421	0.00978177	0.999996	49	7	669	33	1.76141	0.347665	25.6763	1.64442	1.10401	13.7543	Hvcn1	hydrogen voltage-gated channel 1 [Source:MGI Symbol;Acc:MGI:1921346]	GO:0016020(membrane); GO:0055085(transmembrane transport); GO:0006811(monoatomic ion transport); GO:0005886(plasma membrane); GO:1902600(proton transmembrane transport); GO:0005216(monoatomic ion channel activity); GO:0030171(voltage-gated proton channel activity); GO:0031410(cytoplasmic vesicle); GO:0016324(apical plasma membrane); GO:0034702(monoatomic ion channel complex); GO:0031514(motile ci…	transmembrane transport; monoatomic ion transport; proton transmembrane transport; innate immune response; regulation of intracellular pH; cellular response to pH; regulation of reactive oxygen species biosynthetic process; cellular response to zinc ion; positive regulation of superoxide anion generation; response to pH; response to zinc ion; regulation of acrosome reaction	monoatomic ion channel activity; voltage-gated proton channel activity; protein homodimerization activity; identical protein binding	membrane; plasma membrane; cytoplasmic vesicle; apical plasma membrane; monoatomic ion channel complex; motile cilium; sperm flagellum; phagocytic vesicle membrane
ENSMUSG00000053063	3.66695	2.20389	3.54888	0.0595856	0.999996	36	0	407	21	1.2941	0	15.6207	1.04645	0.70395	8.42324	Clec12a	C-type lectin domain family 12, member a [Source:MGI Symbol;Acc:MGI:3040968]	GO:0030545(signaling receptor regulator activity); GO:0016020(membrane)		signaling receptor regulator activity	membrane
ENSMUSG00000030707	3.65706	3.45916	6.5252	0.0106356	0.999996	65	17	1012	30	2.33657	0.844328	38.8406	1.49492	1.63159	20.2689	Coro1a	coronin, actin binding protein 1A [Source:MGI Symbol;Acc:MGI:1345961]	GO:0005515(protein binding); GO:0043524(negative regulation of neuron apoptotic process); GO:0051402(neuron apoptotic process); GO:0071353(cellular response to interleukin-4); GO:0030424(axon); GO:0005737(cytoplasm); GO:0016020(membrane); GO:0048873(homeostasis of number of cells within a tissue); GO:0031410(cytoplasmic vesicle); GO:0005856(cytoskeleton); GO:0045202(synapse); GO:0098978(glutamate…	negative regulation of neuron apoptotic process; neuron apoptotic process; cellular response to interleukin-4; homeostasis of number of cells within a tissue; actin filament organization; establishment of localization in cell; cell migration; nerve growth factor signaling pathway; T cell homeostasis; calcium ion transport; regulation of cell shape; response to cytokine; T cell proliferation; regu…	protein binding; actin binding; actin filament binding; identical protein binding; cytoskeletal protein binding; actin monomer binding; myosin heavy chain binding; protein homodimerization activity; phosphatidylinositol 3-kinase binding	axon; cytoplasm; membrane; cytoplasmic vesicle; cytoskeleton; synapse; glutamatergic synapse; plasma membrane; cell-cell junction; cell cortex; phagocytic vesicle membrane; immunological synapse; early endosome; cell leading edge; stereocilium tip; actin cytoskeleton; phagocytic cup; actin filament; lamellipodium; cortical actin cytoskeleton; phagocytic vesicle; protein-containing complex
ENSMUSG00000056069	3.65106	2.38884	5.07204	0.0243148	0.999996	36	4	479	12	1.2941	0.198666	18.3841	0.59797	0.791975	9.58827	Otulinl	OTU deubiquitinase with linear linkage specificity like [Source:MGI Symbol;Acc:MGI:2687281]	GO:0005737(cytoplasm); GO:0005634(nucleus); GO:0016020(membrane); GO:0005783(endoplasmic reticulum); GO:0005789(endoplasmic reticulum membrane); GO:0005635(nuclear envelope); GO:0098554(cytoplasmic side of endoplasmic reticulum membrane)			cytoplasm; nucleus; membrane; endoplasmic reticulum; endoplasmic reticulum membrane; nuclear envelope; cytoplasmic side of endoplasmic reticulum membrane
ENSMUSG00000032089	3.65008	1.79151	3.45134	0.0632004	0.999996	27	0	309	11	0.970574	0	11.8594	0.548139	0.533207	6.29403	Il10ra	interleukin 10 receptor, alpha [Source:MGI Symbol;Acc:MGI:96538]	GO:0005515(protein binding); GO:0005737(cytoplasm); GO:0016020(membrane); GO:0005886(plasma membrane); GO:0019221(cytokine-mediated signaling pathway); GO:0050807(regulation of synapse organization); GO:0004920(interleukin-10 receptor activity); GO:0019969(interleukin-10 binding); GO:0010507(negative regulation of autophagy); GO:0032496(response to lipopolysaccharide); GO:0046427(positive regulat…	cytokine-mediated signaling pathway; regulation of synapse organization; negative regulation of autophagy; response to lipopolysaccharide; positive regulation of receptor signaling pathway via JAK-STAT; negative regulation of inflammatory response; intestinal epithelial structure maintenance; ubiquitin-dependent endocytosis; interleukin-10-mediated signaling pathway	protein binding; interleukin-10 receptor activity; interleukin-10 binding	cytoplasm; membrane; plasma membrane; cytosol; apical plasma membrane
ENSMUSG00000018008	3.6456	4.22991	6.81291	0.00905012	0.999996	113	29	1731	53	4.06203	1.44032	66.4359	2.64103	2.80036	34.6413	Cyth4	cytohesin 4 [Source:MGI Symbol;Acc:MGI:2441702]	GO:0005085(guanyl-nucleotide exchange factor activity); GO:0032012(regulation of ARF protein signal transduction); GO:0005886(plasma membrane); GO:0008289(lipid binding); GO:0005829(cytosol); GO:0034451(centriolar satellite); GO:0045171(intercellular bridge)	regulation of ARF protein signal transduction	guanyl-nucleotide exchange factor activity; lipid binding	plasma membrane; cytosol; centriolar satellite; intercellular bridge
ENSMUSG00000018507	3.63215	2.02129	5.08528	0.0241298	0.999996	20	9	374	5	0.718944	0.446997	14.3541	0.249154	0.595818	7.39917	Trpv2	transient receptor potential cation channel, subfamily V, member 2 [Source:MGI Symbol;Acc:MGI:1341836]	GO:0005515(protein binding); GO:0016020(membrane); GO:0055085(transmembrane transport); GO:0006811(monoatomic ion transport); GO:0005216(monoatomic ion channel activity); GO:0008285(negative regulation of cell population proliferation); GO:0005737(cytoplasm); GO:0005886(plasma membrane); GO:0005262(calcium channel activity); GO:0070588(calcium ion transmembrane transport); GO:0030027(lamellipodiu…	transmembrane transport; monoatomic ion transport; negative regulation of cell population proliferation; calcium ion transmembrane transport; positive regulation of cold-induced thermogenesis; response to temperature stimulus; positive regulation of axon extension; positive regulation of calcium ion import	protein binding; monoatomic ion channel activity; calcium channel activity; identical protein binding; monoatomic cation channel activity	membrane; cytoplasm; plasma membrane; lamellipodium; melanosome; endomembrane system; cell surface; axon; growth cone membrane; axonal growth cone; cell body
ENSMUSG00000046805	3.62481	7.2506	10.4399	0.00123324	0.966897	903	265	13390	986	32.4603	13.1616	513.909	49.1332	22.8668	281.615	Mpeg1	macrophage expressed gene 1 [Source:MGI Symbol;Acc:MGI:1333743]	GO:0016020(membrane); GO:0002250(adaptive immune response); GO:0031410(cytoplasmic vesicle); GO:0030670(phagocytic vesicle membrane)	adaptive immune response		membrane; cytoplasmic vesicle; phagocytic vesicle membrane
ENSMUSG00000076617	3.62277	1.40788	4.2663	0.0388756	0.999996	18	2	241	3	0.647049	0.0993328	9.2496	0.149492	0.403029	4.79138	Ighm	immunoglobulin heavy constant mu [Source:MGI Symbol;Acc:MGI:96448]	GO:0016020(membrane); GO:0003697(single-stranded DNA binding); GO:0031210(phosphatidylcholine binding); GO:0034987(immunoglobulin receptor binding); GO:0042834(peptidoglycan binding); GO:0002250(adaptive immune response); GO:0019731(antibacterial humoral response); GO:0045087(innate immune response); GO:0050829(defense response to Gram-negative bacterium); GO:0005615(extracellular space); GO:0009…	adaptive immune response; antibacterial humoral response; innate immune response; defense response to Gram-negative bacterium	single-stranded DNA binding; phosphatidylcholine binding; immunoglobulin receptor binding; peptidoglycan binding	membrane; extracellular space; cell surface; pentameric IgM immunoglobulin complex; hexameric IgM immunoglobulin complex
ENSMUSG00000004730	3.61702	5.91892	4.54552	0.033005	0.999996	492	10	5461	276	17.686	0.496664	209.594	13.7533	9.20849	111.773	Adgre1	adhesion G protein-coupled receptor E1 [Source:MGI Symbol;Acc:MGI:106912]	GO:0004930(G protein-coupled receptor activity); GO:0007186(G protein-coupled receptor signaling pathway); GO:0016020(membrane); GO:0005509(calcium ion binding); GO:0007166(cell surface receptor signaling pathway); GO:0004888(transmembrane signaling receptor activity); GO:0005886(plasma membrane); GO:0002250(adaptive immune response); GO:0009897(external side of plasma membrane); GO:0071944(cell …	G protein-coupled receptor signaling pathway; cell surface receptor signaling pathway; adaptive immune response; adenylate cyclase-activating G protein-coupled receptor signaling pathway	G protein-coupled receptor activity; calcium ion binding; transmembrane signaling receptor activity	membrane; plasma membrane; external side of plasma membrane; cell periphery
ENSMUSG00000003477	-3.60297	0.147728	12.3257	0.000446775	0.674741	81	16	5	2	2.91172	0.794662	0.1919	0.0996616	1.90577	0.150893	Inmt	indolethylamine N-methyltransferase [Source:MGI Symbol;Acc:MGI:102963]	GO:0008168(methyltransferase activity); GO:0005829(cytosol); GO:0005737(cytoplasm); GO:0032259(methylation); GO:0009308(amine metabolic process); GO:0008757(S-adenosylmethionine-dependent methyltransferase activity); GO:0009636(response to toxic substance); GO:0004790(thioether S-methyltransferase activity); GO:0008170(N-methyltransferase activity); GO:0030748(amine N-methyltransferase activity);…	methylation; amine metabolic process; response to toxic substance	methyltransferase activity; S-adenosylmethionine-dependent methyltransferase activity; thioether S-methyltransferase activity; N-methyltransferase activity; amine N-methyltransferase activity; dimethyl selenide methyltransferase activity	cytosol; cytoplasm
ENSMUSG00000030263	3.58672	1.3798	7.23076	0.00716649	0.999996	18	2	213	21	0.647049	0.0993328	8.17495	1.04645	0.403029	4.68402	Irag2	inositol 1,4,5-triphosphate receptor associated 2 [Source:MGI Symbol;Acc:MGI:108424]	GO:0005737(cytoplasm); GO:0016020(membrane)			cytoplasm; membrane
ENSMUSG00000024451	3.58308	2.2021	5.41078	0.0200127	0.999996	27	8	420	9	0.970574	0.397331	16.1196	0.448477	0.709075	8.38091	Arap3	ArfGAP with RhoGAP domain, ankyrin repeat and PH domain 3 [Source:MGI Symbol;Acc:MGI:2147274]	GO:0007165(signal transduction); GO:0005096(GTPase activator activity); GO:0043547(positive regulation of GTPase activity); GO:0005547(phosphatidylinositol-3,4,5-trisphosphate binding); GO:0042995(cell projection); GO:0005737(cytoplasm); GO:0005886(plasma membrane); GO:0005856(cytoskeleton); GO:0005515(protein binding); GO:0030027(lamellipodium); GO:0001726(ruffle); GO:0043325(phosphatidylinosito…	signal transduction; positive regulation of GTPase activity	GTPase activator activity; phosphatidylinositol-3,4,5-trisphosphate binding; protein binding; phosphatidylinositol-3,4-bisphosphate binding	cell projection; cytoplasm; plasma membrane; cytoskeleton; lamellipodium; ruffle
ENSMUSG00000121786	3.55665	-1.40433	12.026	0.000524635	0.679139	1	1	11.09	13.74	0.0359472	0.0496664	0.425635	0.684675	0.0417587	0.544761	Gm40287	predicted gene, 40287 [Source:MGI Symbol;Acc:MGI:5623172]
ENSMUSG00000026480	3.55235	3.06009	7.33397	0.00676633	0.999996	48	17	745.99	34	1.72546	0.844328	28.6311	1.69425	1.31276	15.2582	Ncf2	neutrophil cytosolic factor 2 [Source:MGI Symbol;Acc:MGI:97284]	GO:0005515(protein binding); GO:0043020(NADPH oxidase complex); GO:0045730(respiratory burst); GO:0006909(phagocytosis); GO:0016176(superoxide-generating NADPH oxidase activator activity); GO:0005829(cytosol); GO:0005737(cytoplasm); GO:0032870(cellular response to hormone stimulus); GO:0032496(response to lipopolysaccharide); GO:0043525(positive regulation of neuron apoptotic process); GO:0031267…	respiratory burst; phagocytosis; cellular response to hormone stimulus; response to lipopolysaccharide; positive regulation of neuron apoptotic process; response to organic cyclic compound; superoxide anion generation; response to glucose; positive regulation of blood pressure; NADP catabolic process; superoxide metabolic process; regulation of reactive oxygen species biosynthetic process	protein binding; superoxide-generating NADPH oxidase activator activity; small GTPase binding; superoxide-generating NAD(P)H oxidase activity	NADPH oxidase complex; cytosol; cytoplasm; acrosomal vesicle; membrane
ENSMUSG00000056025	-3.55131	2.50063	2.93706	0.086568	0.999996	565.27	1	41	3	20.3199	0.0496664	1.57358	0.149492	10.3093	0.907107	Clca3a1	chloride channel accessory 3A1 [Source:MGI Symbol;Acc:MGI:1316732]	GO:0046872(metal ion binding); GO:0008237(metallopeptidase activity); GO:1902476(chloride transmembrane transport); GO:0006821(chloride transport); GO:0005229(intracellularly calcium-gated chloride channel activity); GO:0005886(plasma membrane); GO:0006508(proteolysis); GO:0006811(monoatomic ion transport)	chloride transmembrane transport; chloride transport; proteolysis; monoatomic ion transport	metal ion binding; metallopeptidase activity; intracellularly calcium-gated chloride channel activity	plasma membrane
ENSMUSG00000029915	3.54631	1.44473	4.59252	0.0321118	0.999996	21	1	239	9	0.754891	0.0496664	9.17284	0.448477	0.439613	4.89709	Clec5a	C-type lectin domain family 5, member a [Source:MGI Symbol;Acc:MGI:1345151]	GO:0030099(myeloid cell differentiation); GO:0005886(plasma membrane); GO:0005515(protein binding); GO:0030246(carbohydrate binding); GO:0001819(positive regulation of cytokine production); GO:0045087(innate immune response); GO:0001618(virus receptor activity); GO:0046718(symbiont entry into host cell); GO:0009986(cell surface); GO:0043066(negative regulation of apoptotic process); GO:0033033(ne…	myeloid cell differentiation; positive regulation of cytokine production; innate immune response; symbiont entry into host cell; negative regulation of apoptotic process; negative regulation of myeloid cell apoptotic process; osteoblast development	protein binding; carbohydrate binding; virus receptor activity	plasma membrane; cell surface; cytosol; membrane
ENSMUSG00000031659	3.5264	3.3017	7.38	0.00659533	0.999996	49	27	888	36	1.76141	1.34099	34.0815	1.79391	1.56312	18.0354	Adcy7	adenylate cyclase 7 [Source:MGI Symbol;Acc:MGI:102891]	GO:0035556(intracellular signal transduction); GO:0009190(cyclic nucleotide biosynthetic process); GO:0005886(plasma membrane); GO:0004016(adenylate cyclase activity); GO:0006171(cAMP biosynthetic process); GO:0016849(phosphorus-oxygen lyase activity); GO:0016020(membrane); GO:0046872(metal ion binding); GO:0005524(ATP binding); GO:0016829(lyase activity); GO:0007189(adenylate cyclase-activating …	intracellular signal transduction; cyclic nucleotide biosynthetic process; cAMP biosynthetic process; adenylate cyclase-activating G protein-coupled receptor signaling pathway; adenylate cyclase-inhibiting G protein-coupled receptor signaling pathway; regulation of adaptive immune response; negative regulation of cytokine production involved in inflammatory response; cellular response to lithium …	adenylate cyclase activity; phosphorus-oxygen lyase activity; metal ion binding; ATP binding; lyase activity	plasma membrane; membrane
ENSMUSG00000026928	3.52309	1.05266	3.19704	0.0737717	0.999996	17	0	183	4	0.611102	0	7.02355	0.199323	0.34058	3.69677	Card9	caspase recruitment domain family, member 9 [Source:MGI Symbol;Acc:MGI:2685628]	GO:0042981(regulation of apoptotic process); GO:0005515(protein binding); GO:0060907(positive regulation of macrophage cytokine production); GO:0005737(cytoplasm); GO:0046872(metal ion binding); GO:0002250(adaptive immune response); GO:0001819(positive regulation of cytokine production); GO:0045087(innate immune response); GO:0009410(response to xenobiotic stimulus); GO:0032760(positive regulatio…	regulation of apoptotic process; positive regulation of macrophage cytokine production; adaptive immune response; positive regulation of cytokine production; innate immune response; response to xenobiotic stimulus; positive regulation of tumor necrosis factor production; protein homooligomerization; JNK cascade; stress-activated MAPK cascade; response to fungus; response to peptidoglycan; respons…	protein binding; metal ion binding; CARD domain binding; signaling adaptor activity; protein homodimerization activity	cytoplasm; cytosol; CBM complex; protein-containing complex
ENSMUSG00000049037	3.5041	1.50721	4.62451	0.0315182	0.999996	20	3	255	5	0.718944	0.148999	9.78692	0.249154	0.463596	5.10918	Clec4a1	C-type lectin domain family 4, member a1 [Source:MGI Symbol;Acc:MGI:3036291]	GO:0016020(membrane); GO:0009897(external side of plasma membrane); GO:0030246(carbohydrate binding); GO:0061760(antifungal innate immune response); GO:0005509(calcium ion binding); GO:0005537(mannose binding); GO:0001818(negative regulation of cytokine production); GO:0002470(plasmacytoid dendritic cell antigen processing and presentation); GO:0032720(negative regulation of tumor necrosis factor…	antifungal innate immune response; negative regulation of cytokine production; plasmacytoid dendritic cell antigen processing and presentation; negative regulation of tumor necrosis factor production; CD8-positive, alpha-beta T cell activation; antigen processing and presentation of exogenous peptide antigen via MHC class I	carbohydrate binding; calcium ion binding; mannose binding	membrane; external side of plasma membrane
ENSMUSG00000078606	3.481	2.20747	3.99504	0.0456343	0.999996	40.74	0	355.34	58.94	1.46449	0	13.638	2.93703	0.793154	8.35383	Gvin2	GTPase, very large interferon inducible, family member 2 [Source:MGI Symbol;Acc:MGI:3782245]	GO:0005525(GTP binding); GO:0005634(nucleus); GO:0005737(cytoplasm); GO:0005829(cytosol)		GTP binding	nucleus; cytoplasm; cytosol
ENSMUSG00000002668	3.47466	0.822417	6.53686	0.0105662	0.999996	12	2	146	10	0.431366	0.0993328	5.60349	0.498308	0.285303	3.12386	Dennd1c	DENN domain containing 1C [Source:MGI Symbol;Acc:MGI:1918035]	GO:0005085(guanyl-nucleotide exchange factor activity); GO:0005737(cytoplasm); GO:0005829(cytosol); GO:0031410(cytoplasmic vesicle); GO:0043231(intracellular membrane-bounded organelle); GO:0030136(clathrin-coated vesicle); GO:0006897(endocytosis); GO:1901981(phosphatidylinositol phosphate binding); GO:0032456(endocytic recycling); GO:0005654(nucleoplasm); GO:0005813(centrosome)	endocytosis; endocytic recycling	guanyl-nucleotide exchange factor activity; phosphatidylinositol phosphate binding	cytoplasm; cytosol; cytoplasmic vesicle; intracellular membrane-bounded organelle; clathrin-coated vesicle; nucleoplasm; centrosome
ENSMUSG00000029771	3.46939	2.53437	5.59154	0.0180475	0.999996	34	13	526	13	1.2222	0.645663	20.1879	0.6478	0.955761	10.516	Irf5	interferon regulatory factor 5 [Source:MGI Symbol;Acc:MGI:1350924]	GO:0006355(regulation of DNA-templated transcription); GO:0005515(protein binding); GO:0003700(DNA-binding transcription factor activity); GO:0000976(transcription cis-regulatory region binding); GO:0005634(nucleus); GO:0045944(positive regulation of transcription by RNA polymerase II); GO:0005737(cytoplasm); GO:0003677(DNA binding); GO:0000978(RNA polymerase II cis-regulatory region sequence-spe…	regulation of DNA-templated transcription; positive regulation of transcription by RNA polymerase II; regulation of transcription by RNA polymerase II; defense response to virus; cytokine-mediated signaling pathway; inflammatory response; innate immune response; positive regulation of DNA-templated transcription; positive regulation of type I interferon production; immune system process; positive…	protein binding; DNA-binding transcription factor activity; transcription cis-regulatory region binding; DNA binding; RNA polymerase II cis-regulatory region sequence-specific DNA binding; DNA-binding transcription factor activity, RNA polymerase II-specific; protein kinase binding; DNA-binding transcription activator activity, RNA polymerase II-specific; identical protein binding; sequence-speci…	nucleus; cytoplasm
ENSMUSG00000052384	3.44076	3.11447	7.40312	0.00651107	0.999996	44	26	769	36	1.58168	1.29133	29.5143	1.79391	1.44516	15.7495	Nrros	negative regulator of reactive oxygen species [Source:MGI Symbol;Acc:MGI:2445095]	GO:0005515(protein binding); GO:0006955(immune response); GO:0005886(plasma membrane); GO:0005783(endoplasmic reticulum); GO:0005789(endoplasmic reticulum membrane); GO:0006954(inflammatory response); GO:0009986(cell surface); GO:0019838(growth factor binding); GO:0005576(extracellular region); GO:0007179(transforming growth factor beta receptor signaling pathway); GO:0006801(superoxide metabolic…	immune response; inflammatory response; transforming growth factor beta receptor signaling pathway; superoxide metabolic process; ERAD pathway; microglia development; sequestering of TGFbeta in extracellular matrix	protein binding; growth factor binding; transforming growth factor beta binding; receptor ligand inhibitor activity	plasma membrane; endoplasmic reticulum; endoplasmic reticulum membrane; cell surface; extracellular region; membrane
ENSMUSG00000020120	3.41037	4.43266	9.29777	0.00229433	0.999996	125	58	1883	126	4.4934	2.88065	72.2697	6.27868	3.71125	39.368	Plek	pleckstrin [Source:MGI Symbol;Acc:MGI:1860485]	GO:0035556(intracellular signal transduction); GO:0005886(plasma membrane); GO:0030036(actin cytoskeleton organization); GO:0033625(positive regulation of integrin activation); GO:0070527(platelet aggregation); GO:0010572(positive regulation of platelet activation); GO:0005080(protein kinase C binding); GO:0042803(protein homodimerization activity); GO:0043325(phosphatidylinositol-3,4-bisphosphat…	intracellular signal transduction; actin cytoskeleton organization; positive regulation of integrin activation; platelet aggregation; positive regulation of platelet activation; hematopoietic progenitor cell differentiation; platelet degranulation; integrin-mediated signaling pathway; negative regulation of inositol phosphate biosynthetic process; cell projection organization; positive regulation…	protein kinase C binding; protein homodimerization activity; phosphatidylinositol-3,4-bisphosphate binding	plasma membrane; cytoplasm; ruffle membrane
ENSMUSG00000019876	3.4058	1.36433	6.00377	0.0142754	0.999996	19	3	218	13	0.682996	0.148999	8.36685	0.6478	0.444168	4.58812	Pkib	protein kinase inhibitor beta, cAMP dependent, testis specific [Source:MGI Symbol;Acc:MGI:101937]	GO:0004862(cAMP-dependent protein kinase inhibitor activity); GO:0006469(negative regulation of protein kinase activity); GO:0032206(positive regulation of telomere maintenance); GO:0004860(protein kinase inhibitor activity)	negative regulation of protein kinase activity; positive regulation of telomere maintenance	cAMP-dependent protein kinase inhibitor activity; protein kinase inhibitor activity
ENSMUSG00000121430	3.38329	0.233319	9.04225	0.0026381	0.999996	6	3	88	11	0.215683	0.148999	3.37745	0.548139	0.186727	2.01864		novel transcript
ENSMUSG00000009687	3.37078	2.53695	5.34201	0.0208175	0.999996	47	6	511	23	1.68952	0.297998	19.6122	1.14611	1.04399	10.4723	Fxyd5	FXYD domain-containing ion transport regulator 5 [Source:MGI Symbol;Acc:MGI:1201785]	GO:0016020(membrane); GO:0099106(ion channel regulator activity); GO:0043269(regulation of monoatomic ion transport); GO:0005886(plasma membrane); GO:0006813(potassium ion transport); GO:0016323(basolateral plasma membrane); GO:0006814(sodium ion transport); GO:0015459(potassium channel regulator activity); GO:0017080(sodium channel regulator activity)	regulation of monoatomic ion transport; potassium ion transport; sodium ion transport	ion channel regulator activity; potassium channel regulator activity; sodium channel regulator activity	membrane; plasma membrane; basolateral plasma membrane
ENSMUSG00000000682	3.35311	3.10955	2.64167	0.104094	0.999996	84	0	763	35	3.01956	0	29.284	1.74408	1.59431	15.6096	Cd52	CD52 antigen [Source:MGI Symbol;Acc:MGI:1346088]	GO:0009617(response to bacterium); GO:0005886(plasma membrane); GO:0098552(side of membrane); GO:0007204(positive regulation of cytosolic calcium ion concentration); GO:0097225(sperm midpiece)	response to bacterium; positive regulation of cytosolic calcium ion concentration		plasma membrane; side of membrane; sperm midpiece
ENSMUSG00000030844	3.32288	2.35577	5.84375	0.0156325	0.999996	35	11	451	18	1.25815	0.54633	17.3094	0.896954	0.929584	9.19642	Rgs10	regulator of G-protein signalling 10 [Source:MGI Symbol;Acc:MGI:1915115]	GO:0005096(GTPase activator activity); GO:0008277(regulation of G protein-coupled receptor signaling pathway); GO:0001965(G-protein alpha-subunit binding); GO:0005515(protein binding); GO:0005634(nucleus); GO:0005737(cytoplasm); GO:0005829(cytosol); GO:0009968(negative regulation of signal transduction); GO:0005886(plasma membrane); GO:0043025(neuronal cell body); GO:0043197(dendritic spine); GO:…	regulation of G protein-coupled receptor signaling pathway; negative regulation of signal transduction; positive regulation of GTPase activity; G protein-coupled acetylcholine receptor signaling pathway; response to amphetamine	GTPase activator activity; G-protein alpha-subunit binding; protein binding	nucleus; cytoplasm; cytosol; plasma membrane; neuronal cell body; dendritic spine; axon terminus; nucleoplasm; nuclear body
ENSMUSG00000052085	3.29827	3.49835	4.7735	0.028901	0.999996	106	6	987	55	3.8104	0.297998	37.8811	2.74069	2.13476	20.4054	Dock8	dedicator of cytokinesis 8 [Source:MGI Symbol;Acc:MGI:1921396]	GO:0005085(guanyl-nucleotide exchange factor activity); GO:0007264(small GTPase-mediated signal transduction); GO:0042995(cell projection); GO:0005737(cytoplasm); GO:0005886(plasma membrane); GO:0005515(protein binding); GO:0031258(lamellipodium membrane); GO:0031252(cell leading edge); GO:0036336(dendritic cell migration); GO:2000406(positive regulation of T cell migration); GO:0070233(negative …	small GTPase-mediated signal transduction; dendritic cell migration; positive regulation of T cell migration; negative regulation of T cell apoptotic process; immunological synapse formation; positive regulation of establishment of T cell polarity; memory T cell proliferation; cellular response to chemokine	guanyl-nucleotide exchange factor activity; protein binding	cell projection; cytoplasm; plasma membrane; lamellipodium membrane; cell leading edge; cytosol; leading edge membrane
ENSMUSG00000114608	3.27853	0.476476	4.6161	0.0316732	0.999996	12.83	0	105.13	12.88	0.461202	0	4.0349	0.641821	0.258972	2.39759	Gm36161	predicted gene, 36161 [Source:MGI Symbol;Acc:MGI:5595320]
ENSMUSG00000030830	3.27581	1.94893	4.82717	0.0280146	0.999996	33	4	336	14	1.18626	0.198666	12.8957	0.697631	0.735037	6.88656	Itgal	integrin alpha L [Source:MGI Symbol;Acc:MGI:96606]	GO:0007155(cell adhesion); GO:0008305(integrin complex); GO:0044877(protein-containing complex binding); GO:0046872(metal ion binding); GO:0009897(external side of plasma membrane); GO:0005886(plasma membrane); GO:0098609(cell-cell adhesion); GO:0005911(cell-cell junction); GO:0007229(integrin-mediated signaling pathway); GO:0009986(cell surface); GO:0001772(immunological synapse); GO:0006909(pha…	cell adhesion; cell-cell adhesion; integrin-mediated signaling pathway; phagocytosis; positive regulation of cell-cell adhesion; cell-matrix adhesion; cell adhesion mediated by integrin; cell surface receptor signaling pathway; calcium-mediated signaling; activated T cell proliferation; positive regulation of calcium-mediated signaling; positive regulation of T cell proliferation; leukocyte cell-…	protein-containing complex binding; metal ion binding; integrin binding; ICAM-3 receptor activity; cell adhesion molecule binding	integrin complex; external side of plasma membrane; plasma membrane; cell-cell junction; cell surface; immunological synapse; membrane; integrin alphaL-beta2 complex
ENSMUSG00000034786	3.27466	1.3588	5.09254	0.024029	0.999996	22.22	2.05	214.87	13.21	0.798746	0.101816	8.24672	0.658265	0.485904	4.53273	Gpsm3	G-protein signalling modulator 3 (AGS3-like, C. elegans) [Source:MGI Symbol;Acc:MGI:2146785]	GO:0005515(protein binding); GO:0030695(GTPase regulator activity); GO:0050727(regulation of inflammatory response); GO:1900017(positive regulation of cytokine production involved in inflammatory response); GO:0005737(cytoplasm); GO:0005886(plasma membrane); GO:0050729(positive regulation of inflammatory response); GO:0002690(positive regulation of leukocyte chemotaxis)	regulation of inflammatory response; positive regulation of cytokine production involved in inflammatory response; positive regulation of inflammatory response; positive regulation of leukocyte chemotaxis	protein binding; GTPase regulator activity	cytoplasm; plasma membrane
ENSMUSG00000026222	3.26775	1.34866	3.04375	0.0810484	0.999996	25	0	217	10	0.89868	0	8.32847	0.498308	0.494966	4.49674	Sp100	nuclear antigen Sp100 [Source:MGI Symbol;Acc:MGI:109561]	GO:0003677(DNA binding); GO:0005634(nucleus); GO:0005737(cytoplasm); GO:0000981(DNA-binding transcription factor activity, RNA polymerase II-specific); GO:0006357(regulation of transcription by RNA polymerase II); GO:0016605(PML body); GO:0005515(protein binding); GO:0000723(telomere maintenance); GO:0030870(Mre11 complex); GO:0010596(negative regulation of endothelial cell migration); GO:0045765…	regulation of transcription by RNA polymerase II; telomere maintenance; negative regulation of endothelial cell migration; regulation of angiogenesis; negative regulation of protein export from nucleus; regulation of extrinsic apoptotic signaling pathway via death domain receptors; regulation of Fas signaling pathway	DNA binding; DNA-binding transcription factor activity, RNA polymerase II-specific; protein binding; metal ion binding	nucleus; cytoplasm; PML body; Mre11 complex
ENSMUSG00000024737	3.26166	3.26036	2.42398	0.119491	0.999996	99	0	848	35	3.55877	0	32.5463	1.74408	1.86897	17.2425	Slc15a3	solute carrier family 15, member 3 [Source:MGI Symbol;Acc:MGI:1929691]	GO:0016020(membrane); GO:0022857(transmembrane transporter activity); GO:0055085(transmembrane transport); GO:0006857(oligopeptide transport); GO:0015293(symporter activity); GO:0005765(lysosomal membrane); GO:0005768(endosome); GO:0015031(protein transport); GO:0005764(lysosome); GO:0045087(innate immune response); GO:0015833(peptide transport); GO:0010008(endosome membrane); GO:0015647(peptidog…	transmembrane transport; oligopeptide transport; protein transport; innate immune response; peptide transport; peptidoglycan transport; positive regulation of nucleotide-binding oligomerization domain containing 2 signaling pathway; dipeptide import across plasma membrane	transmembrane transporter activity; symporter activity; peptidoglycan transmembrane transporter activity; dipeptide transmembrane transporter activity	membrane; lysosomal membrane; endosome; lysosome; endosome membrane; intracellular membrane-bounded organelle
ENSMUSG00000024013	3.24139	1.35155	4.76042	0.0291214	0.999996	20	4	221	7	0.718944	0.198666	8.48199	0.348816	0.485408	4.50189	Fgd2	FYVE, RhoGEF and PH domain containing 2 [Source:MGI Symbol;Acc:MGI:1347084]	GO:0046872(metal ion binding); GO:0005085(guanyl-nucleotide exchange factor activity); GO:0005634(nucleus); GO:0005737(cytoplasm); GO:0042995(cell projection); GO:0005886(plasma membrane); GO:0005768(endosome); GO:0005856(cytoskeleton); GO:0005769(early endosome); GO:0031901(early endosome membrane); GO:0032587(ruffle membrane); GO:0001726(ruffle); GO:0007010(cytoskeleton organization); GO:004684…	cytoskeleton organization; filopodium assembly	metal ion binding; guanyl-nucleotide exchange factor activity; phosphatidylinositol phosphate binding	nucleus; cytoplasm; cell projection; plasma membrane; endosome; cytoskeleton; early endosome; early endosome membrane; ruffle membrane; ruffle
ENSMUSG00000031662	3.2381	1.23768	5.53378	0.0186528	0.999996	18	4	199	10	0.647049	0.198666	7.63763	0.498308	0.44647	4.14921	Snx20	sorting nexin 20 [Source:MGI Symbol;Acc:MGI:1918857]	GO:0005515(protein binding); GO:0035091(phosphatidylinositol binding); GO:0015031(protein transport); GO:0016020(membrane); GO:0005768(endosome); GO:0031901(early endosome membrane); GO:0005654(nucleoplasm)	protein transport	protein binding; phosphatidylinositol binding	membrane; endosome; early endosome membrane; nucleoplasm
ENSMUSG00000041992	3.20492	2.24563	3.71199	0.0540229	0.999996	43	5	426	7	1.54573	0.248332	16.3499	0.348816	0.946403	8.44756	Rapgef5	Rap guanine nucleotide exchange factor (GEF) 5 [Source:MGI Symbol;Acc:MGI:2444365]	GO:0005085(guanyl-nucleotide exchange factor activity); GO:0035556(intracellular signal transduction); GO:0007264(small GTPase-mediated signal transduction); GO:0005634(nucleus); GO:0005886(plasma membrane); GO:0007265(Ras protein signal transduction); GO:0030742(GTP-dependent protein binding); GO:0005654(nucleoplasm); GO:0016604(nuclear body)	intracellular signal transduction; small GTPase-mediated signal transduction; Ras protein signal transduction	guanyl-nucleotide exchange factor activity; GTP-dependent protein binding	nucleus; plasma membrane; nucleoplasm; nuclear body
ENSMUSG00000047180	3.17946	2.23075	3.82334	0.0505433	0.999996	46	3	413	13	1.65357	0.148999	15.851	0.6478	0.95817	8.34373	Neurl3	neuralized E3 ubiquitin protein ligase 3 [Source:MGI Symbol;Acc:MGI:2429944]	GO:0005737(cytoplasm); GO:0046872(metal ion binding); GO:0016740(transferase activity); GO:0016567(protein ubiquitination); GO:0045087(innate immune response); GO:0061630(ubiquitin protein ligase activity); GO:0005769(early endosome); GO:0070086(ubiquitin-dependent endocytosis)	protein ubiquitination; innate immune response; ubiquitin-dependent endocytosis	metal ion binding; transferase activity; ubiquitin protein ligase activity	cytoplasm; early endosome
ENSMUSG00000030745	3.1751	2.67712	5.63683	0.017587	0.999996	54	11	552	29	1.94115	0.54633	21.1858	1.44509	1.28836	11.4074	Il21r	interleukin 21 receptor [Source:MGI Symbol;Acc:MGI:1890475]	GO:0005515(protein binding); GO:0016020(membrane); GO:0004896(cytokine receptor activity); GO:0019221(cytokine-mediated signaling pathway); GO:0016064(immunoglobulin mediated immune response); GO:0009897(external side of plasma membrane); GO:0004888(transmembrane signaling receptor activity)	cytokine-mediated signaling pathway; immunoglobulin mediated immune response	protein binding; cytokine receptor activity; transmembrane signaling receptor activity	membrane; external side of plasma membrane
ENSMUSG00000040026	3.15908	2.69562	4.06043	0.0438993	0.999996	68	2	541	43	2.44441	0.0993328	20.7636	2.14272	1.34495	11.539	Saa3	serum amyloid A 3 [Source:MGI Symbol;Acc:MGI:98223]	GO:0005576(extracellular region); GO:0009617(response to bacterium); GO:0005615(extracellular space); GO:0006953(acute-phase response); GO:0050918(positive chemotaxis); GO:0034364(high-density lipoprotein particle); GO:0071347(cellular response to interleukin-1); GO:0060326(cell chemotaxis); GO:0042056(chemoattractant activity); GO:0035634(response to stilbenoid); GO:0035662(Toll-like receptor 4 …	response to bacterium; acute-phase response; positive chemotaxis; cellular response to interleukin-1; cell chemotaxis; response to stilbenoid	chemoattractant activity; Toll-like receptor 4 binding	extracellular region; extracellular space; high-density lipoprotein particle
ENSMUSG00000030474	3.15329	1.0856	6.39108	0.0114695	0.999996	18	3	167	17	0.647049	0.148999	6.40947	0.847123	0.424698	3.69783	Siglece	sialic acid binding Ig-like lectin E [Source:MGI Symbol;Acc:MGI:1932475]	GO:0005515(protein binding); GO:0006954(inflammatory response); GO:0050728(negative regulation of inflammatory response); GO:0016020(membrane); GO:0005886(plasma membrane); GO:0009897(external side of plasma membrane); GO:0007155(cell adhesion); GO:0030246(carbohydrate binding); GO:0033691(sialic acid binding); GO:0048029(monosaccharide binding); GO:0006911(phagocytosis, engulfment); GO:0060101(n…	inflammatory response; negative regulation of inflammatory response; cell adhesion; phagocytosis, engulfment; negative regulation of phagocytosis, engulfment	protein binding; carbohydrate binding; sialic acid binding; monosaccharide binding	membrane; plasma membrane; external side of plasma membrane
ENSMUSG00000025017	3.15172	3.61539	5.31518	0.0211404	0.999996	114	16	1070	52	4.09798	0.794662	41.0667	2.5912	2.51357	21.9255	Pik3ap1	phosphoinositide-3-kinase adaptor protein 1 [Source:MGI Symbol;Acc:MGI:1933177]	GO:0007165(signal transduction); GO:0005515(protein binding); GO:0005737(cytoplasm); GO:0016020(membrane); GO:0005886(plasma membrane); GO:0005829(cytosol); GO:0005102(signaling receptor binding); GO:0042802(identical protein binding); GO:0034122(negative regulation of toll-like receptor signaling pathway); GO:0051897(positive regulation of phosphatidylinositol 3-kinase/protein kinase B signal tr…	signal transduction; negative regulation of toll-like receptor signaling pathway; positive regulation of phosphatidylinositol 3-kinase/protein kinase B signal transduction; toll-like receptor 4 signaling pathway; regulation of inflammatory response; toll-like receptor 7 signaling pathway; toll-like receptor 9 signaling pathway; toll-like receptor 2 signaling pathway	protein binding; signaling receptor binding; identical protein binding; phosphatidylinositol 3-kinase regulatory subunit binding	cytoplasm; membrane; plasma membrane; cytosol
ENSMUSG00000091649	3.13095	0.0495266	8.17211	0.00425393	0.999996	7.46	2	72.89	11.41	0.268166	0.0993328	2.79752	0.568569	0.19477	1.73187	Phf11b	PHD finger protein 11B [Source:MGI Symbol;Acc:MGI:3645789]	GO:0005634(nucleus); GO:0046872(metal ion binding)		metal ion binding	nucleus
ENSMUSG00000021886	3.12614	1.55355	4.66516	0.0307806	0.999996	29	2	241	18	1.04247	0.0993328	9.2496	0.896954	0.614881	5.15252	Gpr65	G-protein coupled receptor 65 [Source:MGI Symbol;Acc:MGI:108031]	GO:0004930(G protein-coupled receptor activity); GO:0007186(G protein-coupled receptor signaling pathway); GO:0016020(membrane); GO:0007189(adenylate cyclase-activating G protein-coupled receptor signaling pathway); GO:0010447(response to acidic pH); GO:0051496(positive regulation of stress fiber assembly); GO:0005886(plasma membrane)	G protein-coupled receptor signaling pathway; adenylate cyclase-activating G protein-coupled receptor signaling pathway; response to acidic pH; positive regulation of stress fiber assembly	G protein-coupled receptor activity	membrane; plasma membrane
ENSMUSG00000090272	3.11652	0.952903	4.83817	0.0278364	0.999996	15.04	4.03	162.89	6.04	0.540646	0.200155	6.25173	0.300978	0.389156	3.35673	Mndal	myeloid nuclear differentiation antigen like [Source:MGI Symbol;Acc:MGI:3780953]	GO:0002218(activation of innate immune response); GO:0035458(cellular response to interferon-beta); GO:0005634(nucleus); GO:0005654(nucleoplasm); GO:0005829(cytosol); GO:0005730(nucleolus); GO:0003690(double-stranded DNA binding); GO:0030308(negative regulation of cell growth)	activation of innate immune response; cellular response to interferon-beta; negative regulation of cell growth	double-stranded DNA binding	nucleus; nucleoplasm; cytosol; nucleolus
ENSMUSG00000039853	3.11065	-0.0617142	7.59847	0.00584179	0.999996	8	1	65	12	0.287577	0.0496664	2.4947	0.59797	0.184307	1.59026	Trim14	tripartite motif-containing 14 [Source:MGI Symbol;Acc:MGI:1921985]	GO:0005737(cytoplasm); GO:0008270(zinc ion binding); GO:0046872(metal ion binding); GO:0005739(mitochondrion); GO:0031410(cytoplasmic vesicle); GO:0045087(innate immune response); GO:0005741(mitochondrial outer membrane); GO:0061630(ubiquitin protein ligase activity); GO:0016567(protein ubiquitination); GO:0045893(positive regulation of DNA-templated transcription); GO:0045335(phagocytic vesicle)…	innate immune response; protein ubiquitination; positive regulation of DNA-templated transcription; inflammatory response; negative regulation of viral transcription	zinc ion binding; metal ion binding; ubiquitin protein ligase activity; protein binding; transcription coactivator activity; molecular adaptor activity	cytoplasm; mitochondrion; cytoplasmic vesicle; mitochondrial outer membrane; phagocytic vesicle
ENSMUSG00000029299	3.08507	1.10202	10.4201	0.00124653	0.966897	14	7	152	30	0.503261	0.347665	5.83377	1.49492	0.433737	3.71834	Abcg3	ATP binding cassette subfamily G member 3 [Source:MGI Symbol;Acc:MGI:1351624]	GO:0005524(ATP binding); GO:0016020(membrane); GO:0016887(ATP hydrolysis activity); GO:0140359(ABC-type transporter activity); GO:0005886(plasma membrane); GO:0042626(ATPase-coupled transmembrane transporter activity); GO:0055085(transmembrane transport); GO:0015562(efflux transmembrane transporter activity); GO:0032218(riboflavin transport); GO:0032217(riboflavin transmembrane transporter activi…	transmembrane transport; riboflavin transport	ATP binding; ATP hydrolysis activity; ABC-type transporter activity; ATPase-coupled transmembrane transporter activity; efflux transmembrane transporter activity; riboflavin transmembrane transporter activity	membrane; plasma membrane
ENSMUSG00000079227	3.05355	0.992649	2.62962	0.104887	0.999996	22	0	167	6	0.790838	0	6.40947	0.298985	0.437358	3.43526	Ccr5	C-C motif chemokine receptor 5 [Source:MGI Symbol;Acc:MGI:107182]	GO:0004930(G protein-coupled receptor activity); GO:0007186(G protein-coupled receptor signaling pathway); GO:0016020(membrane); GO:0006955(immune response); GO:0006954(inflammatory response); GO:0006935(chemotaxis); GO:0016493(C-C chemokine receptor activity); GO:0004950(chemokine receptor activity); GO:0010628(positive regulation of gene expression); GO:0045666(positive regulation of neuron dif…	G protein-coupled receptor signaling pathway; immune response; inflammatory response; chemotaxis; positive regulation of gene expression; positive regulation of neuron differentiation; chemokine-mediated signaling pathway; positive regulation of cytosolic calcium ion concentration; positive regulation of tumor necrosis factor production; defense response; negative regulation of neural precursor c…	G protein-coupled receptor activity; C-C chemokine receptor activity; chemokine receptor activity; protein kinase binding; C-C chemokine binding; chemokine (C-C motif) ligand 5 binding; actin binding; identical protein binding	membrane; external side of plasma membrane; plasma membrane; cytoplasm; endosome; cell surface
ENSMUSG00000134402	3.05344	-0.763913	11.5994	0.000659743	0.747282	2.51	2.43	31	12	0.0902274	0.120689	1.18978	0.59797	0.10328	0.912754	Gm12250	predicted gene 12250 [Source:NCBI gene (formerly Entrezgene);Acc:631323]
ENSMUSG00000000982	3.04992	1.80241	2.77883	0.095518	0.999996	40	0	283	24	1.43789	0	10.8616	1.19594	0.779255	6.10792	Ccl3	C-C motif chemokine ligand 3 [Source:MGI Symbol;Acc:MGI:98260]	GO:0005576(extracellular region); GO:0006955(immune response); GO:0008009(chemokine activity); GO:0005515(protein binding); GO:0045944(positive regulation of transcription by RNA polymerase II); GO:0005737(cytoplasm); GO:0005615(extracellular space); GO:0005829(cytosol); GO:0016301(kinase activity); GO:0005125(cytokine activity); GO:0007165(signal transduction); GO:0008360(regulation of cell shap…	immune response; positive regulation of transcription by RNA polymerase II; signal transduction; regulation of cell shape; negative regulation of gene expression; inflammatory response; cytoskeleton organization; chemotaxis; lymphocyte chemotaxis; signaling; positive regulation of cytosolic calcium ion concentration; exocytosis; positive chemotaxis; calcium ion transport; neutrophil chemotaxis; p…	chemokine activity; protein binding; kinase activity; cytokine activity; protein kinase activity; CCR chemokine receptor binding; phospholipase activator activity; chemoattractant activity	extracellular region; cytoplasm; extracellular space; cytosol
ENSMUSG00000118181	3.01403	-0.464445	7.05171	0.00791897	0.999996	0	5.92	28.08	24.44	0	0.294025	1.07771	1.21786	0.126487	1.14383	Gm53015	predicted gene, 53015 [Source:MGI Symbol;Acc:MGI:6388904]
ENSMUSG00000059089	3.00518	0.825101	2.77027	0.0960301	0.999996	20	0	145	7	0.718944	0	5.56511	0.348816	0.398771	3.03324	Fcgr4	Fc receptor, IgG, low affinity IV [Source:MGI Symbol;Acc:MGI:2179523]	GO:0071222(cellular response to lipopolysaccharide); GO:0007166(cell surface receptor signaling pathway); GO:0009897(external side of plasma membrane); GO:0005886(plasma membrane); GO:0002376(immune system process); GO:0019767(IgE receptor activity); GO:0019770(IgG receptor activity); GO:0019863(IgE binding); GO:0019864(IgG binding); GO:0140375(immune receptor activity); GO:0001788(antibody-depen…	cellular response to lipopolysaccharide; cell surface receptor signaling pathway; immune system process; antibody-dependent cellular cytotoxicity; dendritic cell antigen processing and presentation; Fc-gamma receptor signaling pathway; Fc-epsilon receptor signaling pathway; neutrophil activation; natural killer cell degranulation; positive regulation of bone resorption; Fc receptor-mediated immun…	IgE receptor activity; IgG receptor activity; IgE binding; IgG binding; immune receptor activity	external side of plasma membrane; plasma membrane; cell surface
ENSMUSG00000000530	3.00393	0.932457	6.94218	0.00841865	0.999996	11	8	149	14	0.395419	0.397331	5.71863	0.697631	0.39627	3.27724	Acvrl1	activin A receptor, type II-like 1 [Source:MGI Symbol;Acc:MGI:1338946]	GO:0005524(ATP binding); GO:0016020(membrane); GO:0004675(transmembrane receptor protein serine/threonine kinase activity); GO:0007178(cell surface receptor protein serine/threonine kinase signaling pathway); GO:0004672(protein kinase activity); GO:0006468(protein phosphorylation); GO:0001701(in utero embryonic development); GO:0005515(protein binding); GO:0010629(negative regulation of gene expr…	cell surface receptor protein serine/threonine kinase signaling pathway; protein phosphorylation; in utero embryonic development; negative regulation of gene expression; positive regulation of angiogenesis; BMP signaling pathway; transforming growth factor beta receptor signaling pathway; angiogenesis; positive regulation of transcription by RNA polymerase II; heart development; cellular response…	ATP binding; transmembrane receptor protein serine/threonine kinase activity; protein kinase activity; protein binding; metal ion binding; protein serine/threonine kinase activity; SMAD binding; BMP receptor activity; transforming growth factor beta receptor activity, type I; transforming growth factor beta receptor activity; activin receptor activity, type I; protein kinase binding; activin bind…	membrane; plasma membrane; neuronal cell body; cell surface; dendrite; BMP receptor complex
ENSMUSG00000092447	-2.99481	1.65394	3.64868	0.0561138	0.999996	283.89	11	3	24.78	10.205	0.54633	0.11514	1.23481	5.48025	0.632653	Gm7696	predicted gene 7696 [Source:MGI Symbol;Acc:MGI:3649133]
ENSMUSG00000033450	2.98989	1.40139	6.01097	0.0142172	0.999996	20.71	7.55	214.12	15.78	0.744466	0.374981	8.21794	0.78633	0.577404	4.58003	Tagap	T cell activation Rho GTPase activating protein [Source:MGI Symbol;Acc:MGI:3615484]	GO:0007165(signal transduction); GO:0005096(GTPase activator activity); GO:0035023(regulation of Rho protein signal transduction); GO:0005085(guanyl-nucleotide exchange factor activity); GO:0051607(defense response to virus)	signal transduction; regulation of Rho protein signal transduction; defense response to virus	GTPase activator activity; guanyl-nucleotide exchange factor activity
ENSMUSG00000021822	2.97905	3.61433	6.71275	0.0095726	0.999996	58	68	1038	65	2.08494	3.37731	39.8385	3.239	2.70624	21.6318	Plau	plasminogen activator, urokinase [Source:MGI Symbol;Acc:MGI:97611]	GO:0006508(proteolysis); GO:0004252(serine-type endopeptidase activity); GO:0005515(protein binding); GO:0008284(positive regulation of cell population proliferation); GO:0001525(angiogenesis); GO:0042127(regulation of cell population proliferation); GO:0005615(extracellular space); GO:0005576(extracellular region); GO:0016301(kinase activity); GO:0008236(serine-type peptidase activity); GO:00149…	proteolysis; positive regulation of cell population proliferation; angiogenesis; regulation of cell population proliferation; smooth muscle cell migration; response to hypoxia; positive regulation of cell migration; skeletal muscle tissue regeneration; positive regulation of smooth muscle cell migration; fibrinolysis; regulation of hepatocyte proliferation; regulation of plasminogen activation; n…	serine-type endopeptidase activity; protein binding; kinase activity; serine-type peptidase activity; peptidase activity	extracellular space; extracellular region; protein complex involved in cell-matrix adhesion; cell surface; external side of plasma membrane; serine protease inhibitor complex; serine-type endopeptidase complex
ENSMUSG00000047250	2.97536	3.19726	4.7747	0.0288808	0.999996	50	46	809	22	1.79736	2.28465	31.0495	1.09628	2.02942	16.1734	Ptgs1	prostaglandin-endoperoxide synthase 1 [Source:MGI Symbol;Acc:MGI:97797]	GO:0020037(heme binding); GO:0004601(peroxidase activity); GO:0006979(response to oxidative stress); GO:0008217(regulation of blood pressure); GO:0005737(cytoplasm); GO:0042127(regulation of cell population proliferation); GO:0016020(membrane); GO:0046872(metal ion binding); GO:0005783(endoplasmic reticulum); GO:0005789(endoplasmic reticulum membrane); GO:0004666(prostaglandin-endoperoxide syntha…	response to oxidative stress; regulation of blood pressure; regulation of cell population proliferation; cellular oxidant detoxification; memory; prostaglandin biosynthetic process; keratinocyte differentiation; positive regulation of vasoconstriction; learning; maintenance of blood-brain barrier; prostaglandin metabolic process; positive regulation of smooth muscle contraction; negative regulati…	heme binding; peroxidase activity; metal ion binding; prostaglandin-endoperoxide synthase activity; dioxygenase activity; oxidoreductase activity, acting on single donors with incorporation of molecular oxygen, incorporation of two atoms of oxygen	cytoplasm; membrane; endoplasmic reticulum; endoplasmic reticulum membrane; neuron projection; photoreceptor outer segment; nuclear envelope; Golgi apparatus; intracellular membrane-bounded organelle
ENSMUSG00000018169	2.96959	0.390386	2.26896	0.131989	0.999996	12	2	111	0	0.431366	0.0993328	4.26019	0	0.285303	2.209	Mfng	MFNG O-fucosylpeptide 3-beta-N-acetylglucosaminyltransferase [Source:MGI Symbol;Acc:MGI:1095404]	GO:0016020(membrane); GO:0016757(glycosyltransferase activity); GO:0000139(Golgi membrane); GO:0007389(pattern specification process); GO:0033829(O-fucosylpeptide 3-beta-N-acetylglucosaminyltransferase activity); GO:0005794(Golgi apparatus); GO:0046872(metal ion binding); GO:0005515(protein binding); GO:0002315(marginal zone B cell differentiation); GO:0045747(positive regulation of Notch signali…	pattern specification process; marginal zone B cell differentiation; positive regulation of Notch signaling pathway; blastocyst formation; regulation of Notch signaling pathway	glycosyltransferase activity; O-fucosylpeptide 3-beta-N-acetylglucosaminyltransferase activity; metal ion binding; protein binding	membrane; Golgi membrane; Golgi apparatus
ENSMUSG00000034641	2.96914	0.726317	2.16083	0.141568	0.999996	19	0	140	2	0.682996	0	5.37321	0.0996616	0.379417	2.81803	Cd300ld	CD300 molecule like family member d [Source:MGI Symbol;Acc:MGI:2442358]	GO:0005515(protein binding); GO:0005886(plasma membrane); GO:0002376(immune system process); GO:0046718(symbiont entry into host cell); GO:0032675(regulation of interleukin-6 production); GO:0032680(regulation of tumor necrosis factor production); GO:0001618(virus receptor activity)	immune system process; symbiont entry into host cell; regulation of interleukin-6 production; regulation of tumor necrosis factor production	protein binding; virus receptor activity	plasma membrane
ENSMUSG00000102037	2.96539	0.123114	3.95796	0.0466501	0.999996	11.92	0	78.64	9.78	0.42849	0	3.01821	0.487345	0.241035	1.80667	Bcl2a1a	B cell leukemia/lymphoma 2 related protein A1a [Source:MGI Symbol;Acc:MGI:102687]	GO:0042981(regulation of apoptotic process); GO:0043066(negative regulation of apoptotic process); GO:0001783(B cell apoptotic process); GO:0002903(negative regulation of B cell apoptotic process); GO:0044877(protein-containing complex binding); GO:0005737(cytoplasm); GO:0005515(protein binding); GO:0006915(apoptotic process); GO:0055085(transmembrane transport); GO:0001782(B cell homeostasis); G…	regulation of apoptotic process; negative regulation of apoptotic process; B cell apoptotic process; negative regulation of B cell apoptotic process; apoptotic process; transmembrane transport; B cell homeostasis; release of cytochrome c from mitochondria; intrinsic apoptotic signaling pathway in response to DNA damage; extrinsic apoptotic signaling pathway in absence of ligand; mitochondrial fus…	protein-containing complex binding; protein binding; BH domain binding; channel activity	cytoplasm; mitochondrial outer membrane
ENSMUSG00000111504	2.9353	-1.0656	9.50714	0.00204673	0.999996	1	3	23	10	0.0359472	0.148999	0.882741	0.498308	0.0842264	0.704398	Gm48284	predicted gene, 48284 [Source:MGI Symbol;Acc:MGI:6097718]
ENSMUSG00000057967	-2.91859	-0.736142	5.12896	0.0235299	0.999996	12	29	0	5	0.431366	1.44032	0	0.249154	0.896353	0.110201	Fgf18	fibroblast growth factor 18 [Source:MGI Symbol;Acc:MGI:1277980]	GO:0008083(growth factor activity); GO:0007165(signal transduction); GO:0001503(ossification); GO:0030324(lung development); GO:0005634(nucleus); GO:0008284(positive regulation of cell population proliferation); GO:0070371(ERK1 and ERK2 cascade); GO:0005737(cytoplasm); GO:0001525(angiogenesis); GO:0008283(cell population proliferation); GO:0005615(extracellular space); GO:0005576(extracellular re…	signal transduction; ossification; lung development; positive regulation of cell population proliferation; ERK1 and ERK2 cascade; angiogenesis; cell population proliferation; cell differentiation; positive regulation of ERK1 and ERK2 cascade; nervous system development; positive regulation of protein phosphorylation; fibroblast growth factor receptor signaling pathway; animal organ morphogenesis;…	growth factor activity; fibroblast growth factor receptor binding; type 1 fibroblast growth factor receptor binding; type 2 fibroblast growth factor receptor binding	nucleus; cytoplasm; extracellular space; extracellular region; nucleolus
ENSMUSG00000004266	2.91597	3.8638	7.65031	0.00567626	0.999996	120	49	1196	103	4.31366	2.43365	45.9026	5.13257	3.40393	25.6057	Ptpn6	protein tyrosine phosphatase, non-receptor type 6 [Source:MGI Symbol;Acc:MGI:96055]	GO:0004725(protein tyrosine phosphatase activity); GO:0006470(protein dephosphorylation); GO:0016311(dephosphorylation); GO:0005515(protein binding); GO:0045577(regulation of B cell differentiation); GO:0005737(cytoplasm); GO:0005634(nucleus); GO:0030154(cell differentiation); GO:0005911(cell-cell junction); GO:0004721(phosphoprotein phosphatase activity); GO:0035556(intracellular signal transduc…	protein dephosphorylation; dephosphorylation; regulation of B cell differentiation; cell differentiation; intracellular signal transduction; negative regulation of MAPK cascade; cytokine-mediated signaling pathway; hematopoietic progenitor cell differentiation; natural killer cell mediated cytotoxicity; mitotic cell cycle; platelet formation; platelet aggregation; negative regulation of T cell re…	protein tyrosine phosphatase activity; protein binding; phosphoprotein phosphatase activity; natural killer cell lectin-like receptor binding; SH3 domain binding; cell adhesion molecule binding; phosphotyrosine residue binding; SH2 domain binding; transmembrane receptor protein tyrosine phosphatase activity; non-membrane spanning protein tyrosine phosphatase activity; cytokine receptor binding; p…	cytoplasm; nucleus; cell-cell junction; cytosol; apical dendrite; alpha-beta T cell receptor complex; nucleoplasm; nucleolus; plasma membrane; protein-containing complex
ENSMUSG00000029919	2.91358	3.64617	6.76241	0.00930977	0.999996	102	43	1047	73	3.66661	2.13565	40.1839	3.63765	2.92888	22.0022	Hpgds	hematopoietic prostaglandin D synthase [Source:MGI Symbol;Acc:MGI:1859384]	GO:0005737(cytoplasm); GO:0016740(transferase activity); GO:0004364(glutathione transferase activity); GO:0005509(calcium ion binding); GO:0000287(magnesium ion binding); GO:0016853(isomerase activity); GO:0001516(prostaglandin biosynthetic process); GO:2000255(negative regulation of male germ cell proliferation); GO:0004667(prostaglandin-D synthase activity); GO:0006693(prostaglandin metabolic p…	prostaglandin biosynthetic process; negative regulation of male germ cell proliferation; prostaglandin metabolic process	transferase activity; glutathione transferase activity; calcium ion binding; magnesium ion binding; isomerase activity; prostaglandin-D synthase activity; protein homodimerization activity	cytoplasm; nucleoplasm; cytosol; intracellular membrane-bounded organelle
ENSMUSG00000034792	2.9072	1.10294	4.16663	0.0412277	0.999996	10	12	181	5	0.359472	0.595997	6.94679	0.249154	0.465458	3.68199	Gna15	guanine nucleotide binding protein, alpha 15 [Source:MGI Symbol;Acc:MGI:95770]	GO:0007165(signal transduction); GO:0007186(G protein-coupled receptor signaling pathway); GO:0003924(GTPase activity); GO:0019001(guanyl nucleotide binding); GO:0031683(G-protein beta/gamma-subunit complex binding); GO:0001664(G protein-coupled receptor binding); GO:0046872(metal ion binding); GO:0005737(cytoplasm); GO:0005525(GTP binding); GO:0005834(heterotrimeric G-protein complex); GO:000150…	signal transduction; G protein-coupled receptor signaling pathway; action potential; phospholipase C-activating G protein-coupled receptor signaling pathway; adenylate cyclase-modulating G protein-coupled receptor signaling pathway; calcium-mediated signaling; phospholipase C-activating dopamine receptor signaling pathway	GTPase activity; guanyl nucleotide binding; G-protein beta/gamma-subunit complex binding; G protein-coupled receptor binding; metal ion binding; GTP binding	cytoplasm; heterotrimeric G-protein complex
ENSMUSG00000079293	2.88916	0.970758	2.36034	0.124455	0.999996	24	0	162	6	0.862732	0	6.21757	0.298985	0.475798	3.33856	Clec7a	C-type lectin domain family 7, member a [Source:MGI Symbol;Acc:MGI:1861431]	GO:0001872((1->3)-beta-D-glucan binding); GO:0071226(cellular response to molecule of fungal origin); GO:0016020(membrane)	cellular response to molecule of fungal origin	(1->3)-beta-D-glucan binding	membrane
ENSMUSG00000026548	2.86924	1.3841	2.46677	0.116277	0.999996	33	0	211	14	1.18626	0	8.09819	0.697631	0.647254	4.47698	Slamf9	SLAM family member 9 [Source:MGI Symbol;Acc:MGI:1923692]	GO:0016020(membrane); GO:0009986(cell surface)			membrane; cell surface
ENSMUSG00000114172	-2.86834	-0.128933	6.21876	0.0126403	0.999996	30.18	37.52	9.86	0	1.08489	1.86348	0.378427	0	1.45104	0.20907	Gm36298	predicted gene, 36298 [Source:MGI Symbol;Acc:MGI:5595457]
ENSMUSG00000030560	2.84109	4.51794	6.5906	0.0102519	0.999996	120	138	1928	121	4.31366	6.85396	73.9968	6.02953	5.55664	40.1081	Ctsc	cathepsin C [Source:MGI Symbol;Acc:MGI:109553]	GO:0006508(proteolysis); GO:0008234(cysteine-type peptidase activity); GO:0005737(cytoplasm); GO:0005615(extracellular space); GO:0004197(cysteine-type endopeptidase activity); GO:0005764(lysosome); GO:0004252(serine-type endopeptidase activity); GO:0042802(identical protein binding); GO:0006915(apoptotic process); GO:0051603(proteolysis involved in protein catabolic process); GO:0062023(collagen…	proteolysis; apoptotic process; proteolysis involved in protein catabolic process; negative regulation of myelination; positive regulation of apoptotic signaling pathway; T cell mediated cytotoxicity; positive regulation of microglial cell activation; positive regulation of proteolysis involved in protein catabolic process	cysteine-type peptidase activity; cysteine-type endopeptidase activity; serine-type endopeptidase activity; identical protein binding; phosphatase binding; protein-folding chaperone binding; dipeptidyl-peptidase activity; peptidase activator activity involved in apoptotic process; chloride ion binding	cytoplasm; extracellular space; lysosome; collagen-containing extracellular matrix; nucleoplasm; centrosome; intracellular membrane-bounded organelle
ENSMUSG00000001128	2.80523	4.09161	8.1522	0.0043009	0.999996	143	67	1368	136	5.14045	3.32765	52.5039	6.77699	4.25836	29.726	Cfp	complement factor properdin [Source:MGI Symbol;Acc:MGI:97545]	GO:0005615(extracellular space); GO:0005576(extracellular region); GO:0006957(complement activation, alternative pathway); GO:0030141(secretory granule); GO:0098548(cytoplasmic side of Golgi membrane); GO:0050778(positive regulation of immune response); GO:0006956(complement activation); GO:1903028(positive regulation of opsonization)	complement activation, alternative pathway; positive regulation of immune response; complement activation; positive regulation of opsonization		extracellular space; extracellular region; secretory granule; cytoplasmic side of Golgi membrane
ENSMUSG00000018927	2.80011	2.9101	4.90661	0.0267541	0.999996	74	21	632	33	2.66009	1.04299	24.2562	1.64442	1.89191	13.0433	Ccl6	C-C motif chemokine ligand 6 [Source:MGI Symbol;Acc:MGI:98263]	GO:0005576(extracellular region); GO:0006955(immune response); GO:0008009(chemokine activity); GO:0005615(extracellular space); GO:0005125(cytokine activity); GO:0006935(chemotaxis); GO:0006954(inflammatory response); GO:0061844(antimicrobial humoral immune response mediated by antimicrobial peptide); GO:0048020(CCR chemokine receptor binding); GO:0030335(positive regulation of cell migration); G…	immune response; chemotaxis; inflammatory response; antimicrobial humoral immune response mediated by antimicrobial peptide; positive regulation of cell migration; eosinophil chemotaxis; chemokine-mediated signaling pathway; cell chemotaxis	chemokine activity; cytokine activity; CCR chemokine receptor binding	extracellular region; extracellular space
ENSMUSG00000016756	2.7884	0.165297	6.67497	0.00977763	0.999996	6	6	80	10	0.215683	0.297998	3.07041	0.498308	0.251744	1.83849	Cmah	cytidine monophospho-N-acetylneuraminic acid hydroxylase [Source:MGI Symbol;Acc:MGI:103227]	GO:0051537(2 iron, 2 sulfur cluster binding); GO:0005737(cytoplasm); GO:0046872(metal ion binding); GO:0005783(endoplasmic reticulum); GO:0016491(oxidoreductase activity); GO:0006054(N-acetylneuraminate metabolic process); GO:0046381(CMP-N-acetylneuraminate metabolic process); GO:0030338(CMP-N-acetylneuraminate monooxygenase activity)	N-acetylneuraminate metabolic process; CMP-N-acetylneuraminate metabolic process	2 iron, 2 sulfur cluster binding; metal ion binding; oxidoreductase activity; CMP-N-acetylneuraminate monooxygenase activity	cytoplasm; endoplasmic reticulum
ENSMUSG00000079685	2.78234	1.1438	5.88554	0.0152657	0.999996	17	9	172	15	0.611102	0.446997	6.60137	0.747462	0.537129	3.74682	Ulbp1	UL16 binding protein 1 [Source:MGI Symbol;Acc:MGI:1925027]	GO:0032729(positive regulation of type II interferon production); GO:0016020(membrane); GO:0006955(immune response); GO:0005615(extracellular space); GO:0009897(external side of plasma membrane); GO:0005886(plasma membrane); GO:0002839(positive regulation of immune response to tumor cell); GO:0032816(positive regulation of natural killer cell activation); GO:0042271(susceptibility to natural kill…	positive regulation of type II interferon production; immune response; positive regulation of immune response to tumor cell; positive regulation of natural killer cell activation; susceptibility to natural killer cell mediated cytotoxicity; positive regulation of macrophage activation; positive regulation of nitric oxide biosynthetic process; positive regulation of T cell mediated cytotoxicity; a…	natural killer cell lectin-like receptor binding	membrane; extracellular space; external side of plasma membrane; plasma membrane
ENSMUSG00000025473	2.76437	4.22882	8.63927	0.00328993	0.999996	169	70	1473	170	6.07507	3.47665	56.5338	8.47123	4.80733	32.5848	Adam8	a disintegrin and metallopeptidase domain 8 [Source:MGI Symbol;Acc:MGI:107825]	GO:0006508(proteolysis); GO:0008237(metallopeptidase activity); GO:0004222(metalloendopeptidase activity); GO:0016020(membrane); GO:0046872(metal ion binding); GO:0098609(cell-cell adhesion); GO:0005886(plasma membrane); GO:0050839(cell adhesion molecule binding); GO:0005509(calcium ion binding); GO:0006954(inflammatory response); GO:0005515(protein binding); GO:0051897(positive regulation of pho…	proteolysis; cell-cell adhesion; inflammatory response; positive regulation of phosphatidylinositol 3-kinase/protein kinase B signal transduction; regulation of cell-cell adhesion; positive regulation of epithelial to mesenchymal transition; positive regulation of inflammatory response; positive regulation of bone resorption; positive regulation of thymocyte apoptotic process; positive regulation…	metallopeptidase activity; metalloendopeptidase activity; metal ion binding; cell adhesion molecule binding; calcium ion binding; protein binding; integrin binding; zinc ion binding; tumor necrosis factor receptor superfamily binding; immunoglobulin receptor binding	membrane; plasma membrane; cytoplasm; alpha9-beta1 integrin-ADAM8 complex; podosome; cell surface; phagolysosome; dense core granule membrane; specific granule; tertiary granule
ENSMUSG00000047810	2.76043	2.1418	5.32919	0.0209711	0.999996	31	22	361	23	1.11436	1.09266	13.8552	1.14611	1.10427	7.58658	Ccdc88b	coiled-coil domain containing 88B [Source:MGI Symbol;Acc:MGI:1925567]	GO:0030705(cytoskeleton-dependent intracellular transport); GO:0005737(cytoplasm); GO:0016020(membrane); GO:0005794(Golgi apparatus); GO:0005783(endoplasmic reticulum); GO:0005856(cytoskeleton); GO:0051959(dynein light intermediate chain binding); GO:0005515(protein binding); GO:0005815(microtubule organizing center); GO:0001819(positive regulation of cytokine production); GO:0042832(defense resp…	cytoskeleton-dependent intracellular transport; positive regulation of cytokine production; defense response to protozoan; cytoplasmic microtubule organization; positive regulation of T cell proliferation; positive regulation of T cell activation	dynein light intermediate chain binding; protein binding; microtubule binding	cytoplasm; membrane; Golgi apparatus; endoplasmic reticulum; cytoskeleton; microtubule organizing center; centrosome; nucleoplasm; cytosol
ENSMUSG00000020143	2.75585	3.8763	5.70448	0.0169217	0.999996	152	41	1214	84	5.46397	2.03632	46.5934	4.18579	3.80064	25.4817	Dock2	dedicator of cyto-kinesis 2 [Source:MGI Symbol;Acc:MGI:2149010]	GO:0005515(protein binding); GO:0005085(guanyl-nucleotide exchange factor activity); GO:0005096(GTPase activator activity); GO:0007264(small GTPase-mediated signal transduction); GO:0030036(actin cytoskeleton organization); GO:0005737(cytoplasm); GO:0016020(membrane); GO:0005886(plasma membrane); GO:0005856(cytoskeleton); GO:0012505(endomembrane system); GO:0016477(cell migration); GO:0035022(pos…	small GTPase-mediated signal transduction; actin cytoskeleton organization; cell migration; positive regulation of Rac protein signal transduction; positive thymic T cell selection; myoblast fusion; T cell proliferation; chemotaxis; positive regulation of phagocytosis; immunological synapse formation; alpha-beta T cell proliferation; T cell activation; cytoskeleton organization; negative thymic T…	protein binding; guanyl-nucleotide exchange factor activity; GTPase activator activity; small GTPase binding; T cell receptor binding	cytoplasm; membrane; plasma membrane; cytoskeleton; endomembrane system
ENSMUSG00000016087	2.73795	1.43342	4.12572	0.042236	0.999996	10	20	222	10	0.359472	0.993328	8.52037	0.498308	0.647483	4.59323	Fli1	Friend leukemia integration 1 [Source:MGI Symbol;Acc:MGI:95554]	GO:0006355(regulation of DNA-templated transcription); GO:0003700(DNA-binding transcription factor activity); GO:0043565(sequence-specific DNA binding); GO:0006357(regulation of transcription by RNA polymerase II); GO:0005634(nucleus); GO:0000978(RNA polymerase II cis-regulatory region sequence-specific DNA binding); GO:0003682(chromatin binding); GO:0003677(DNA binding); GO:0000981(DNA-binding t…	regulation of DNA-templated transcription; regulation of transcription by RNA polymerase II; positive regulation of transcription by RNA polymerase II; blood circulation; animal organ morphogenesis; megakaryocyte development; positive regulation of DNA-templated transcription	DNA-binding transcription factor activity; sequence-specific DNA binding; RNA polymerase II cis-regulatory region sequence-specific DNA binding; chromatin binding; DNA binding; DNA-binding transcription factor activity, RNA polymerase II-specific; DNA-binding transcription activator activity, RNA polymerase II-specific; transcription cis-regulatory region binding; sequence-specific double-strande…	nucleus; nucleoplasm; cytosol; nuclear body
ENSMUSG00000022148	2.73209	3.57579	6.94383	0.00841088	0.999996	122.14	35.72	938.08	101.94	4.39059	1.77408	36.0036	5.07975	3.12739	20.624	Fyb1	FYN binding protein 1 [Source:MGI Symbol;Acc:MGI:1346327]	GO:0005886(plasma membrane); GO:0007229(integrin-mediated signaling pathway); GO:0005515(protein binding); GO:0008289(lipid binding); GO:0044877(protein-containing complex binding); GO:0005634(nucleus); GO:0005737(cytoplasm); GO:0070161(anchoring junction); GO:0032991(protein-containing complex); GO:0050852(T cell receptor signaling pathway); GO:0072659(protein localization to plasma membrane); G…	integrin-mediated signaling pathway; T cell receptor signaling pathway; protein localization to plasma membrane	protein binding; lipid binding; protein-containing complex binding	plasma membrane; nucleus; cytoplasm; anchoring junction; protein-containing complex; cytosol
ENSMUSG00000105076	-2.7096	0.238346	2.39852	0.12145	0.999996	101	1	13	1	3.63067	0.0496664	0.498941	0.0498308	1.92838	0.296208	A930003O13Rik	RIKEN cDNA A930003O13 gene [Source:MGI Symbol;Acc:MGI:3612704]
ENSMUSG00000030729	2.70347	3.03031	4.02571	0.0448118	0.999996	83	26	698	23	2.98362	1.29133	26.7893	1.14611	2.17576	14.0659	Pgm2l1	phosphoglucomutase 2-like 1 [Source:MGI Symbol;Acc:MGI:1918224]	GO:0005975(carbohydrate metabolic process); GO:0016868(intramolecular phosphotransferase activity); GO:0005737(cytoplasm); GO:0046872(metal ion binding); GO:0005829(cytosol); GO:0016740(transferase activity); GO:0016853(isomerase activity); GO:0006006(glucose metabolic process); GO:0047933(glucose-1,6-bisphosphate synthase activity)	carbohydrate metabolic process; glucose metabolic process	intramolecular phosphotransferase activity; metal ion binding; transferase activity; isomerase activity; glucose-1,6-bisphosphate synthase activity	cytoplasm; cytosol
ENSMUSG00000028589	-2.68734	2.15611	3.31898	0.0684844	0.999996	386	23	5	43	13.8756	1.14233	0.1919	2.14272	7.61211	1.11128	Cfap107	cilia and flagella associated protein 107 [Source:MGI Symbol;Acc:MGI:1916614]	GO:0042995(cell projection); GO:0005737(cytoplasm); GO:0005856(cytoskeleton); GO:0005930(axoneme); GO:0030317(flagellated sperm motility); GO:0036126(sperm flagellum); GO:0160111(axonemal A tubule inner sheath); GO:0005879(axonemal microtubule)	flagellated sperm motility		cell projection; cytoplasm; cytoskeleton; axoneme; sperm flagellum; axonemal A tubule inner sheath; axonemal microtubule
ENSMUSG00000025584	2.68726	0.733687	3.65564	0.0558798	0.999996	20	2	130	8	0.718944	0.0993328	4.98941	0.398646	0.441883	2.76607	Pde8a	phosphodiesterase 8A [Source:MGI Symbol;Acc:MGI:1277116]	GO:0007165(signal transduction); GO:0004114(3',5'-cyclic-nucleotide phosphodiesterase activity); GO:0008081(phosphoric diester hydrolase activity); GO:0046872(metal ion binding); GO:0016787(hydrolase activity); GO:0005829(cytosol); GO:0005634(nucleus); GO:0004115(3',5'-cyclic-AMP phosphodiesterase activity); GO:0006198(cAMP catabolic process); GO:0070374(positive regulation of ERK1 and ERK2 casca…	signal transduction; cAMP catabolic process; positive regulation of ERK1 and ERK2 cascade; cAMP-mediated signaling; cellular response to epidermal growth factor stimulus	3',5'-cyclic-nucleotide phosphodiesterase activity; phosphoric diester hydrolase activity; metal ion binding; hydrolase activity; 3',5'-cyclic-AMP phosphodiesterase activity; 3',5'-cyclic-GMP phosphodiesterase activity; kinase binding; protein kinase activator activity	cytosol; nucleus; perinuclear region of cytoplasm
ENSMUSG00000031613	2.67514	2.3818	3.67137	0.0553548	0.999996	68	6	422	29	2.44441	0.297998	16.1964	1.44509	1.43545	8.90702	Hpgd	hydroxyprostaglandin dehydrogenase 15 (NAD) [Source:MGI Symbol;Acc:MGI:108085]	GO:0016491(oxidoreductase activity); GO:0005737(cytoplasm); GO:0005615(extracellular space); GO:0051287(NAD binding); GO:0045786(negative regulation of cell cycle); GO:0007565(female pregnancy); GO:0070403(NAD+ binding); GO:0042802(identical protein binding); GO:0006693(prostaglandin metabolic process); GO:0043065(positive regulation of apoptotic process); GO:0016323(basolateral plasma membrane);…	negative regulation of cell cycle; female pregnancy; prostaglandin metabolic process; positive regulation of apoptotic process; response to ethanol; transforming growth factor beta receptor signaling pathway; positive regulation of vascular associated smooth muscle cell proliferation; ductus arteriosus closure; ovulation; kidney development; parturition; response to estradiol; response to lipopol…	oxidoreductase activity; NAD binding; NAD+ binding; identical protein binding; prostaglandin E receptor activity; 15-hydroxyprostaglandin dehydrogenase (NAD+) activity; oxidoreductase activity, acting on the CH-OH group of donors, NAD or NADP as acceptor	cytoplasm; extracellular space; basolateral plasma membrane; nucleoplasm; cytosol
ENSMUSG00000023349	2.66639	0.730595	2.06528	0.150687	0.999996	23	0	133	5	0.826785	0	5.10455	0.249154	0.456596	2.75332	Clec4n	C-type lectin domain family 4, member n [Source:MGI Symbol;Acc:MGI:1861231]	GO:0046872(metal ion binding); GO:0002250(adaptive immune response); GO:0009897(external side of plasma membrane); GO:0005886(plasma membrane); GO:0005509(calcium ion binding); GO:0030246(carbohydrate binding); GO:0005515(protein binding); GO:0001819(positive regulation of cytokine production); GO:0045087(innate immune response); GO:0061760(antifungal innate immune response); GO:2000318(positive …	adaptive immune response; positive regulation of cytokine production; innate immune response; antifungal innate immune response; positive regulation of T-helper 17 type immune response; positive regulation of canonical NF-kappaB signal transduction; positive regulation of peptidyl-tyrosine phosphorylation; stimulatory C-type lectin receptor signaling pathway; defense response to fungus; response …	metal ion binding; calcium ion binding; carbohydrate binding; protein binding; mannose binding; pattern recognition receptor activity; signaling receptor activity	external side of plasma membrane; plasma membrane; membrane
ENSMUSG00000032356	-2.61749	0.837151	4.2119	0.0401414	0.999996	150	7	10	11	5.39208	0.347665	0.383801	0.548139	2.96053	0.458954	Rasgrf1	RAS protein-specific guanine nucleotide-releasing factor 1 [Source:MGI Symbol;Acc:MGI:99694]	GO:0005085(guanyl-nucleotide exchange factor activity); GO:0035556(intracellular signal transduction); GO:0007264(small GTPase-mediated signal transduction); GO:0048146(positive regulation of fibroblast proliferation); GO:0005886(plasma membrane); GO:0005515(protein binding); GO:0043025(neuronal cell body); GO:0031267(small GTPase binding); GO:0007265(Ras protein signal transduction); GO:0030971(…	intracellular signal transduction; small GTPase-mediated signal transduction; positive regulation of fibroblast proliferation; Ras protein signal transduction; response to endoplasmic reticulum stress; positive regulation of Ras protein signal transduction; regulation of synaptic plasticity; type B pancreatic cell proliferation; regulation of neuronal synaptic plasticity; neuron projection develo…	guanyl-nucleotide exchange factor activity; protein binding; small GTPase binding; receptor tyrosine kinase binding; glutamate receptor binding	plasma membrane; neuronal cell body; basolateral plasma membrane; apicolateral plasma membrane; cytosol; apical dendrite; growth cone
ENSMUSG00000032691	2.58311	0.744456	3.76651	0.0522885	0.999996	19	4	131	7	0.682996	0.198666	5.02779	0.348816	0.46596	2.76182	Nlrp3	NLR family, pyrin domain containing 3 [Source:MGI Symbol;Acc:MGI:2653833]	GO:0005515(protein binding); GO:0005634(nucleus); GO:0045944(positive regulation of transcription by RNA polymerase II); GO:0005737(cytoplasm); GO:0016020(membrane); GO:0000139(Golgi membrane); GO:0005794(Golgi apparatus); GO:0043565(sequence-specific DNA binding); GO:0005783(endoplasmic reticulum); GO:0005524(ATP binding); GO:0016787(hydrolase activity); GO:0005739(mitochondrion); GO:0005829(cyt…	positive regulation of transcription by RNA polymerase II; inflammatory response; innate immune response; pattern recognition receptor signaling pathway; positive regulation of interleukin-1 beta production; positive regulation of inflammatory response; protein homooligomerization; pyroptosis; defense response to virus; cellular response to lipopolysaccharide; regulation of inflammatory response;…	protein binding; sequence-specific DNA binding; ATP binding; hydrolase activity; DNA-binding transcription factor binding; phosphatidylinositol-4-phosphate binding; ATP hydrolysis activity; signaling adaptor activity; ADP binding; phosphatidylinositol phosphate binding; small molecule sensor activity	nucleus; cytoplasm; membrane; Golgi membrane; Golgi apparatus; endoplasmic reticulum; mitochondrion; cytosol; extracellular region; cytoskeleton; microtubule organizing center; canonical inflammasome complex; interphase microtubule organizing center; NLRP3 inflammasome complex
ENSMUSG00000028005	-2.57402	0.991703	3.31717	0.0685596	0.999996	163	11	25	2	5.85939	0.54633	0.959502	0.0996616	3.29075	0.563633	Gucy1b1	guanylate cyclase 1, soluble, beta 1 [Source:MGI Symbol;Acc:MGI:1860604]	GO:0035556(intracellular signal transduction); GO:0020037(heme binding); GO:0009190(cyclic nucleotide biosynthetic process); GO:0004383(guanylate cyclase activity); GO:0006182(cGMP biosynthetic process); GO:0016849(phosphorus-oxygen lyase activity); GO:0044877(protein-containing complex binding); GO:0005737(cytoplasm); GO:0046872(metal ion binding); GO:0005525(GTP binding); GO:0016829(lyase activ…	intracellular signal transduction; cyclic nucleotide biosynthetic process; cGMP biosynthetic process; cGMP-mediated signaling; response to oxygen levels; nitric oxide-cGMP-mediated signaling; cellular response to nitric oxide	heme binding; guanylate cyclase activity; phosphorus-oxygen lyase activity; protein-containing complex binding; metal ion binding; GTP binding; lyase activity; adenylate cyclase activity; cytidylate cyclase activity; Hsp90 protein binding; nitric oxide binding	cytoplasm; glutamatergic synapse; protein-containing complex; presynaptic active zone; guanylate cyclase complex, soluble; presynaptic active zone cytoplasmic component; cytosol
ENSMUSG00000020000	-2.56945	1.45352	2.11397	0.14596	0.999996	246	2	35	3	8.84301	0.0993328	1.3433	0.149492	4.58147	0.787339	Moxd1	monooxygenase, DBH-like 1 [Source:MGI Symbol;Acc:MGI:1921582]	GO:0003824(catalytic activity); GO:0005507(copper ion binding); GO:0004497(monooxygenase activity); GO:0016715(oxidoreductase activity, acting on paired donors, with incorporation or reduction of molecular oxygen, reduced ascorbate as one donor, and incorporation of one atom of oxygen); GO:0004500(dopamine beta-monooxygenase activity); GO:0016020(membrane); GO:0046872(metal ion binding); GO:00056…	octopamine biosynthetic process; dopamine catabolic process; norepinephrine biosynthetic process	catalytic activity; copper ion binding; monooxygenase activity; oxidoreductase activity, acting on paired donors, with incorporation or reduction of molecular oxygen, reduced ascorbate as one donor, and incorporation of one atom of oxygen; dopamine beta-monooxygenase activity; metal ion binding	membrane; extracellular space; endoplasmic reticulum; endoplasmic reticulum membrane; secretory granule membrane
ENSMUSG00000003283	2.55504	2.77203	5.89119	0.0152168	0.999996	67	30	530	53	2.40846	1.48999	20.3414	2.64103	1.97151	11.5726	Hck	hemopoietic cell kinase [Source:MGI Symbol;Acc:MGI:96052]	GO:0005524(ATP binding); GO:0005515(protein binding); GO:0004672(protein kinase activity); GO:0006468(protein phosphorylation); GO:0004713(protein tyrosine kinase activity); GO:0005634(nucleus); GO:0042995(cell projection); GO:0005737(cytoplasm); GO:0005794(Golgi apparatus); GO:0005886(plasma membrane); GO:0005829(cytosol); GO:0031410(cytoplasmic vesicle); GO:0070161(anchoring junction); GO:00058…	protein phosphorylation; regulation of cell shape; inflammatory response; innate immune response; phagocytosis; cell differentiation; exocytosis; regulation of actin cytoskeleton organization; positive regulation of cell population proliferation; protein autophosphorylation; defense response to Gram-positive bacterium; cell surface receptor protein tyrosine kinase signaling pathway; peptidyl-tyro…	ATP binding; protein binding; protein kinase activity; protein tyrosine kinase activity; non-membrane spanning protein tyrosine kinase activity; signaling receptor binding; phosphotyrosine residue binding	nucleus; cell projection; cytoplasm; Golgi apparatus; plasma membrane; cytosol; cytoplasmic vesicle; anchoring junction; cytoskeleton; focal adhesion; lysosome; caveola; transport vesicle; actin filament; cytoplasmic side of plasma membrane; intracellular membrane-bounded organelle
ENSMUSG00000028337	2.55353	0.48241	4.1156	0.0424894	0.999996	15	4	106	7	0.539208	0.198666	4.06829	0.348816	0.387717	2.27598	Coro2a	coronin, actin binding protein 2A [Source:MGI Symbol;Acc:MGI:1345966]	GO:0005515(protein binding); GO:0017053(transcription repressor complex); GO:0003779(actin binding); GO:0051015(actin filament binding); GO:0005903(brush border)		protein binding; actin binding; actin filament binding	transcription repressor complex; brush border
ENSMUSG00000092312	-2.54632	1.30258	1.53896	0.214773	0.999996	216.4	4.89	0	27.53	7.77897	0.242869	0	1.37184	4.11491	0.634119	Zfp419	zinc finger protein 419 [Source:MGI Symbol;Acc:MGI:3643847]
ENSMUSG00000020681	-2.54283	2.88583	6.53395	0.0105835	0.999996	89	440	52	46	3.1993	21.8532	1.99576	2.29222	12.4299	2.13837	Ace	angiotensin I converting enzyme [Source:MGI Symbol;Acc:MGI:87874]	GO:0016020(membrane); GO:0006508(proteolysis); GO:0008237(metallopeptidase activity); GO:0008241(peptidyl-dipeptidase activity); GO:0005515(protein binding); GO:0010629(negative regulation of gene expression); GO:0007283(spermatogenesis); GO:0050769(positive regulation of neurogenesis); GO:0008217(regulation of blood pressure); GO:0032496(response to lipopolysaccharide); GO:0048286(lung alveolus …	proteolysis; negative regulation of gene expression; spermatogenesis; positive regulation of neurogenesis; regulation of blood pressure; response to lipopolysaccharide; lung alveolus development; kidney development; positive regulation of apoptotic process; male gonad development; animal organ regeneration; regulation of systemic arterial blood pressure by renin-angiotensin; positive regulation o…	metallopeptidase activity; peptidyl-dipeptidase activity; protein binding; metal ion binding; peptidase activity; calmodulin binding; metalloendopeptidase activity; carboxypeptidase activity; heterocyclic compound binding; chloride ion binding; endopeptidase activity; exopeptidase activity; tripeptidyl-peptidase activity; zinc ion binding; mitogen-activated protein kinase kinase binding; bradykin…	membrane; cytoplasm; plasma membrane; extracellular space; extracellular region; basal plasma membrane; brush border membrane; sperm midpiece; vesicle; lysosome; endosome; external side of plasma membrane; extracellular exosome
ENSMUSG00000050010	-2.52481	0.642084	2.92337	0.0873056	0.999996	5	100	5	14	0.179736	4.96664	0.1919	0.697631	2.4746	0.422573	Shisa3	shisa family member 3 [Source:MGI Symbol;Acc:MGI:3041225]	GO:0016020(membrane); GO:0005783(endoplasmic reticulum); GO:0005789(endoplasmic reticulum membrane); GO:0090090(negative regulation of canonical Wnt signaling pathway)	negative regulation of canonical Wnt signaling pathway		membrane; endoplasmic reticulum; endoplasmic reticulum membrane
ENSMUSG00000074622	2.51618	2.8107	2.16133	0.141522	0.999996	111	2	581	24	3.99014	0.0993328	22.2988	1.19594	2.13399	11.8423	Mafb	MAF bZIP transcription factor B [Source:MGI Symbol;Acc:MGI:104555]	GO:0003677(DNA binding); GO:0006355(regulation of DNA-templated transcription); GO:0003700(DNA-binding transcription factor activity); GO:0010467(gene expression); GO:0005634(nucleus); GO:0045944(positive regulation of transcription by RNA polymerase II); GO:0005515(protein binding); GO:0044877(protein-containing complex binding); GO:0006357(regulation of transcription by RNA polymerase II); GO:0…	regulation of DNA-templated transcription; gene expression; positive regulation of transcription by RNA polymerase II; regulation of transcription by RNA polymerase II; positive regulation of DNA-templated transcription; inner ear morphogenesis; protein processing; segment specification; keratinocyte differentiation; negative regulation of osteoclast differentiation; respiratory gaseous exchange …	DNA binding; DNA-binding transcription factor activity; protein binding; protein-containing complex binding; sequence-specific DNA binding; RNA polymerase II cis-regulatory region sequence-specific DNA binding; DNA-binding transcription factor activity, RNA polymerase II-specific; identical protein binding; DNA-binding transcription activator activity, RNA polymerase II-specific; sequence-specifi…	nucleus; nucleoplasm; transcription regulator complex; RNA polymerase II transcription regulator complex
ENSMUSG00000039316	2.51081	1.87891	3.85223	0.0496799	0.999996	45	10	293	18	1.61762	0.496664	11.2454	0.896954	1.09652	6.15535	Rftn1	raftlin lipid raft linker 1 [Source:MGI Symbol;Acc:MGI:1923688]	GO:0005737(cytoplasm); GO:0005886(plasma membrane); GO:0005768(endosome); GO:0045121(membrane raft); GO:0005769(early endosome); GO:0003725(double-stranded RNA binding); GO:0032991(protein-containing complex); GO:0050852(T cell receptor signaling pathway); GO:0043330(response to exogenous dsRNA); GO:0032740(positive regulation of interleukin-17 production); GO:0034138(toll-like receptor 3 signali…	T cell receptor signaling pathway; response to exogenous dsRNA; positive regulation of interleukin-17 production; toll-like receptor 3 signaling pathway; protein localization to membrane raft; dsRNA transport; membrane raft assembly; T cell antigen processing and presentation; protein transport into membrane raft; positive regulation of growth rate; B cell receptor signaling pathway	double-stranded RNA binding	cytoplasm; plasma membrane; endosome; membrane raft; early endosome; protein-containing complex; membrane
ENSMUSG00000097705	2.51011	0.515308	5.85733	0.0155123	0.999996	7	11	98.52	14.9	0.25163	0.54633	3.7812	0.742479	0.382662	2.31624	Gm26740	predicted gene, 26740 [Source:MGI Symbol;Acc:MGI:5477234]
ENSMUSG00000033213	2.5098	1.74087	3.86618	0.0492684	0.999996	30	17	271	12	1.07842	0.844328	10.401	0.59797	0.970164	5.58625	AA467197	expressed sequence AA467197 [Source:MGI Symbol;Acc:MGI:3034182]	GO:0016020(membrane); GO:0005739(mitochondrion); GO:0009617(response to bacterium); GO:0005634(nucleus); GO:0045277(respiratory chain complex IV)	response to bacterium		membrane; mitochondrion; nucleus; respiratory chain complex IV
ENSMUSG00000028459	2.50669	2.71288	2.39378	0.121819	0.999996	104	2	523	37	3.73851	0.0993328	20.0728	1.84374	2.00613	11.0458	Cd72	CD72 antigen [Source:MGI Symbol;Acc:MGI:88345]	GO:0005886(plasma membrane); GO:0004888(transmembrane signaling receptor activity); GO:0016020(membrane); GO:0030246(carbohydrate binding); GO:0050859(negative regulation of B cell receptor signaling pathway)	negative regulation of B cell receptor signaling pathway	transmembrane signaling receptor activity; carbohydrate binding	plasma membrane; membrane
ENSMUSG00000133147	-2.48233	-0.0444653	3.53706	0.0600118	0.999996	42.42	29.75	0	10.88	1.52488	1.47757	0	0.542159	1.5026	0.243503		novel transcript
ENSMUSG00000018930	2.48084	0.794375	1.74932	0.185962	0.999996	27	0	137	5	0.970574	0	5.25807	0.249154	0.533207	2.83085	Ccl4	C-C motif chemokine ligand 4 [Source:MGI Symbol;Acc:MGI:98261]	GO:0005576(extracellular region); GO:0006955(immune response); GO:0008009(chemokine activity); GO:0005515(protein binding); GO:0071466(cellular response to xenobiotic stimulus); GO:0005615(extracellular space); GO:0005125(cytokine activity); GO:0007165(signal transduction); GO:0006954(inflammatory response); GO:0006935(chemotaxis); GO:0060326(cell chemotaxis); GO:0032760(positive regulation of tu…	immune response; cellular response to xenobiotic stimulus; signal transduction; inflammatory response; chemotaxis; cell chemotaxis; positive regulation of tumor necrosis factor production; antimicrobial humoral immune response mediated by antimicrobial peptide; positive regulation of cell migration; eosinophil chemotaxis; chemokine-mediated signaling pathway; leukocyte chemotaxis; positive regula…	chemokine activity; protein binding; cytokine activity; CCR chemokine receptor binding	extracellular region; extracellular space
ENSMUSG00000071203	2.47484	0.541836	2.7667	0.0962446	0.999996	21	1	110.09	7	0.754891	0.0496664	4.22526	0.348816	0.439613	2.35559	Naip5	NLR family, apoptosis inhibitory protein 5 [Source:MGI Symbol;Acc:MGI:1298220]	GO:0043066(negative regulation of apoptotic process); GO:0043027(cysteine-type endopeptidase inhibitor activity involved in apoptotic process); GO:0046872(metal ion binding); GO:0042742(defense response to bacterium); GO:0005524(ATP binding); GO:0005515(protein binding); GO:0006915(apoptotic process); GO:0043025(neuronal cell body); GO:0006954(inflammatory response); GO:0045087(innate immune resp…	negative regulation of apoptotic process; defense response to bacterium; apoptotic process; inflammatory response; innate immune response; defense response to Gram-negative bacterium; pyroptosis; symbiont entry into host cell; detection of bacterium; positive regulation of interleukin-1 beta production	cysteine-type endopeptidase inhibitor activity involved in apoptotic process; metal ion binding; ATP binding; protein binding	neuronal cell body; perikaryon; IPAF inflammasome complex
ENSMUSG00000006403	-2.47287	1.87674	6.26767	0.0122961	0.999996	283	38	33	18	10.1731	1.88732	1.26654	0.896954	6.11176	1.09246	Adamts4	ADAM metallopeptidase with thrombospondin type 1 motif 4 [Source:MGI Symbol;Acc:MGI:1339949]	GO:0006508(proteolysis); GO:0008237(metallopeptidase activity); GO:0004222(metalloendopeptidase activity); GO:0030198(extracellular matrix organization); GO:0005515(protein binding); GO:0046872(metal ion binding); GO:0005576(extracellular region); GO:0062023(collagen-containing extracellular matrix); GO:0042742(defense response to bacterium); GO:0031012(extracellular matrix); GO:0002020(protease …	proteolysis; extracellular matrix organization; defense response to bacterium	metallopeptidase activity; metalloendopeptidase activity; protein binding; metal ion binding; protease binding; peptidase activity; zinc ion binding	extracellular region; collagen-containing extracellular matrix; extracellular matrix; extracellular space; nuclear speck
ENSMUSG00000141329	-2.46904	-0.689212	5.09693	0.0239682	0.999996	13	28	1	6	0.467313	1.39066	0.0383801	0.298985	0.89277	0.154286		novel transcript, sense overlapping RP23-473B17.1
ENSMUSG00000092204	-2.46365	0.242508	2.61891	0.105597	0.999996	97.98	1.92	3.49	10.47	3.5221	0.0953594	0.133946	0.521728	1.8942	0.309201	Vmn2r-ps49	vomeronasal 2, receptor, pseudogene 49 [Source:MGI Symbol;Acc:MGI:3757889]
ENSMUSG00000032643	2.46358	0.625484	4.78057	0.0287826	0.999996	12	9	114	10	0.431366	0.446997	4.37533	0.498308	0.438353	2.5024	Fhl3	four and a half LIM domains 3 [Source:MGI Symbol;Acc:MGI:1341092]	GO:0046872(metal ion binding); GO:0005634(nucleus); GO:0005737(cytoplasm); GO:0005515(protein binding); GO:0030018(Z disc); GO:0003779(actin binding); GO:0030036(actin cytoskeleton organization); GO:0003712(transcription coregulator activity); GO:0001725(stress fiber)	actin cytoskeleton organization	metal ion binding; protein binding; actin binding; transcription coregulator activity	nucleus; cytoplasm; Z disc; stress fiber
ENSMUSG00000017724	-2.46351	1.63885	5.48907	0.0191357	0.999996	38	181	29	15	1.36599	8.98961	1.11302	0.747462	5.08985	0.941718	Etv4	ets variant 4 [Source:MGI Symbol;Acc:MGI:99423]	GO:0006355(regulation of DNA-templated transcription); GO:0005634(nucleus); GO:0003700(DNA-binding transcription factor activity); GO:0043565(sequence-specific DNA binding); GO:0006357(regulation of transcription by RNA polymerase II); GO:0003677(DNA binding); GO:0000978(RNA polymerase II cis-regulatory region sequence-specific DNA binding); GO:0001228(DNA-binding transcription activator activity…	regulation of DNA-templated transcription; regulation of transcription by RNA polymerase II; positive regulation of keratinocyte differentiation; positive regulation of transcription by RNA polymerase II; stem cell differentiation; transcription by RNA polymerase II; positive regulation of gene expression; positive regulation of DNA-templated transcription; motor neuron axon guidance; negative re…	DNA-binding transcription factor activity; sequence-specific DNA binding; DNA binding; RNA polymerase II cis-regulatory region sequence-specific DNA binding; DNA-binding transcription activator activity, RNA polymerase II-specific; sequence-specific double-stranded DNA binding; DNA-binding transcription factor activity, RNA polymerase II-specific	nucleus; chromosome; nucleolus
ENSMUSG00000029254	2.46188	0.447311	1.99412	0.157911	0.999996	21	0	103	6	0.754891	0	3.95315	0.298985	0.418084	2.19408	Stap1	signal transducing adaptor family member 1 [Source:MGI Symbol;Acc:MGI:1926193]	GO:0035591(signaling adaptor activity); GO:0009617(response to bacterium); GO:0005515(protein binding); GO:0030099(myeloid cell differentiation); GO:0005634(nucleus); GO:0005737(cytoplasm); GO:0005739(mitochondrion); GO:0030674(protein-macromolecule adaptor activity); GO:0032991(protein-containing complex); GO:0019901(protein kinase binding); GO:0010628(positive regulation of gene expression); GO…	response to bacterium; myeloid cell differentiation; positive regulation of gene expression; cell surface receptor protein tyrosine kinase signaling pathway; cellular response to lipopolysaccharide; negative regulation of phosphorylation; negative regulation of macrophage chemotaxis; positive regulation of B cell receptor signaling pathway; positive regulation of phagocytosis, engulfment; negativ…	signaling adaptor activity; protein binding; protein-macromolecule adaptor activity; protein kinase binding; macrophage colony-stimulating factor receptor binding; phosphotyrosine residue binding; transmembrane receptor protein tyrosine kinase adaptor activity; protein tyrosine kinase activator activity; receptor tyrosine kinase binding	nucleus; cytoplasm; mitochondrion; protein-containing complex; nucleoplasm; cytosol; centriolar satellite
ENSMUSG00000019838	2.45514	1.67146	3.69673	0.0545192	0.999996	44	6	244	21	1.58168	0.297998	9.36474	1.04645	0.987596	5.28284	Slc16a10	solute carrier family 16 (monocarboxylic acid transporters), member 10 [Source:MGI Symbol;Acc:MGI:1919722]	GO:0022857(transmembrane transporter activity); GO:0055085(transmembrane transport); GO:0005886(plasma membrane); GO:0016323(basolateral plasma membrane); GO:0070327(thyroid hormone transport); GO:0008028(monocarboxylic acid transmembrane transporter activity); GO:0006590(thyroid hormone generation); GO:0070460(thyroid-stimulating hormone secretion); GO:0015349(thyroid hormone transmembrane trans…	transmembrane transport; thyroid hormone transport; thyroid hormone generation; thyroid-stimulating hormone secretion; monocarboxylic acid transport; aromatic amino acid transport; phenylalanine transport; tryptophan transport; tyrosine transport	transmembrane transporter activity; monocarboxylic acid transmembrane transporter activity; thyroid hormone transmembrane transporter activity; L-tyrosine transmembrane transporter activity; aromatic amino acid transmembrane transporter activity; L-phenylalanine transmembrane transporter activity; L-tryptophan transmembrane transporter activity	plasma membrane; basolateral plasma membrane; cell junction; intracellular membrane-bounded organelle; membrane
ENSMUSG00000059479	2.45409	0.466474	4.23824	0.0395231	0.999996	16	4	101	9	0.575155	0.198666	3.87639	0.448477	0.40735	2.22558	B3gnt8	UDP-GlcNAc:betaGal beta-1,3-N-acetylglucosaminyltransferase 8 [Source:MGI Symbol;Acc:MGI:2385269]	GO:0016020(membrane); GO:0016757(glycosyltransferase activity); GO:0016758(hexosyltransferase activity); GO:0006486(protein glycosylation); GO:0000139(Golgi membrane); GO:0005794(Golgi apparatus); GO:0006493(protein O-linked glycosylation); GO:0030311(poly-N-acetyllactosamine biosynthetic process); GO:0016262(protein N-acetylglucosaminyltransferase activity)	protein glycosylation; protein O-linked glycosylation; poly-N-acetyllactosamine biosynthetic process	glycosyltransferase activity; hexosyltransferase activity; protein N-acetylglucosaminyltransferase activity	membrane; Golgi membrane; Golgi apparatus
ENSMUSG00000024598	-2.45136	1.12901	2.92983	0.0869566	0.999996	182	9	29	3	6.54239	0.446997	1.11302	0.149492	3.58876	0.666871	Fbn2	fibrillin 2 [Source:MGI Symbol;Acc:MGI:95490]	GO:0005509(calcium ion binding); GO:0005515(protein binding); GO:0005576(extracellular region); GO:0007165(signal transduction); GO:0062023(collagen-containing extracellular matrix); GO:0005179(hormone activity); GO:0031012(extracellular matrix); GO:0005201(extracellular matrix structural constituent); GO:0035108(limb morphogenesis); GO:0009653(anatomical structure morphogenesis); GO:0030326(embr…	signal transduction; limb morphogenesis; anatomical structure morphogenesis; embryonic limb morphogenesis; positive regulation of osteoblast differentiation; positive regulation of bone mineralization; sequestering of TGFbeta in extracellular matrix; camera-type eye development; embryonic eye morphogenesis; bone trabecula formation	calcium ion binding; protein binding; hormone activity; extracellular matrix structural constituent	extracellular region; collagen-containing extracellular matrix; extracellular matrix; microfibril
ENSMUSG00000025969	2.43571	4.39148	3.82157	0.0505967	0.999996	290	52	1718	91	10.4247	2.58265	65.937	4.5346	6.57605	35.3328	Nrp2	neuropilin 2 [Source:MGI Symbol;Acc:MGI:1100492]	GO:0016020(membrane); GO:0017154(semaphorin receptor activity); GO:0007411(axon guidance); GO:0038084(vascular endothelial growth factor signaling pathway); GO:0005021(vascular endothelial growth factor receptor activity); GO:0001525(angiogenesis); GO:1990830(cellular response to leukemia inhibitory factor); GO:0005515(protein binding); GO:0007507(heart development); GO:0030424(axon); GO:0046872(…	axon guidance; vascular endothelial growth factor signaling pathway; angiogenesis; cellular response to leukemia inhibitory factor; heart development; nervous system development; cell differentiation; semaphorin-plexin signaling pathway; outflow tract septum morphogenesis; trunk neural crest cell migration; negative chemotaxis; neuron migration; facial nerve structural organization; vestibulococh…	semaphorin receptor activity; vascular endothelial growth factor receptor activity; protein binding; metal ion binding; heparin binding	membrane; axon; plasma membrane; glutamatergic synapse; neuron projection; postsynaptic membrane
ENSMUSG00000032092	-2.42918	1.42819	4.54562	0.0330031	0.999996	194	35	6	28	6.97375	1.73832	0.23028	1.39526	4.42405	0.772459	Mpzl2	myelin protein zero-like 2 [Source:MGI Symbol;Acc:MGI:1289160]	GO:0016020(membrane)			membrane
ENSMUSG00000125961	2.416	-1.44151	6.63785	0.00998341	0.999996	1	3	11	11	0.0359472	0.148999	0.422181	0.548139	0.0842264	0.479865		novel transcript
ENSMUSG00000078945	2.4084	2.19425	4.15584	0.0414913	0.999996	59	14	351.78	30.88	2.12088	0.695329	13.5013	1.53877	1.4505	7.6008	Naip2	NLR family, apoptosis inhibitory protein 2 [Source:MGI Symbol;Acc:MGI:1298226]	GO:0043066(negative regulation of apoptotic process); GO:0043027(cysteine-type endopeptidase inhibitor activity involved in apoptotic process); GO:0071391(cellular response to estrogen stimulus); GO:0046872(metal ion binding); GO:0042742(defense response to bacterium); GO:0005524(ATP binding); GO:0005515(protein binding); GO:0006915(apoptotic process); GO:0043025(neuronal cell body); GO:0006954(i…	negative regulation of apoptotic process; cellular response to estrogen stimulus; defense response to bacterium; apoptotic process; inflammatory response; innate immune response; pyroptosis; detection of bacterium	cysteine-type endopeptidase inhibitor activity involved in apoptotic process; metal ion binding; ATP binding; protein binding	neuronal cell body; perikaryon; IPAF inflammasome complex
ENSMUSG00000022014	2.40208	0.296862	3.48648	0.0618719	0.999996	14	4	92	5	0.503261	0.198666	3.53097	0.249154	0.368031	1.95626	Epsti1	epithelial stromal interaction 1 [Source:MGI Symbol;Acc:MGI:1915168]
ENSMUSG00000026437	2.39775	2.44046	4.42837	0.0353462	0.999996	50	32	427	30	1.79736	1.58932	16.3883	1.49492	1.69893	9.02765	Cdk18	cyclin dependent kinase 18 [Source:MGI Symbol;Acc:MGI:97518]	GO:0005524(ATP binding); GO:0004672(protein kinase activity); GO:0006468(protein phosphorylation); GO:0005634(nucleus); GO:0004674(protein serine/threonine kinase activity); GO:0005737(cytoplasm); GO:0106310(protein serine kinase activity); GO:0004693(cyclin-dependent protein serine/threonine kinase activity); GO:0051726(regulation of cell cycle); GO:0031643(positive regulation of myelination)	protein phosphorylation; regulation of cell cycle; positive regulation of myelination	ATP binding; protein kinase activity; protein serine/threonine kinase activity; protein serine kinase activity; cyclin-dependent protein serine/threonine kinase activity	nucleus; cytoplasm
ENSMUSG00000023000	-2.37893	1.08092	4.85592	0.0275514	0.999996	23.59	122	14	15.69	0.847994	6.0593	0.537321	0.781845	3.36904	0.650448	Dhh	desert hedgehog [Source:MGI Symbol;Acc:MGI:94891]	GO:0007267(cell-cell signaling); GO:0016540(protein autoprocessing); GO:0007275(multicellular organism development); GO:0016539(intein-mediated protein splicing); GO:0005515(protein binding); GO:0001649(osteoblast differentiation); GO:0000139(Golgi membrane); GO:0005794(Golgi apparatus); GO:0046872(metal ion binding); GO:0005615(extracellular space); GO:0005886(plasma membrane); GO:0005783(endopl…	cell-cell signaling; protein autoprocessing; multicellular organism development; intein-mediated protein splicing; osteoblast differentiation; proteolysis; regulation of steroid biosynthetic process; system development; regulation of gene expression; smoothened signaling pathway; cell fate specification; spermatid development; Leydig cell differentiation; positive regulation of smoothened signali…	protein binding; metal ion binding; calcium ion binding; peptidase activity; transferase activity; zinc ion binding; patched binding; cholesterol-protein transferase activity	Golgi membrane; Golgi apparatus; extracellular space; plasma membrane; endoplasmic reticulum; endoplasmic reticulum membrane; extracellular region
ENSMUSG00000044827	2.37794	2.05149	5.44736	0.0195979	0.999996	29.29	31.32	304.02	37.87	1.05289	1.55555	11.6683	1.88709	1.28814	6.85013	Tlr1	toll-like receptor 1 [Source:MGI Symbol;Acc:MGI:1341295]	GO:0005515(protein binding); GO:0007165(signal transduction); GO:0016020(membrane); GO:0006955(immune response); GO:0004888(transmembrane signaling receptor activity); GO:0002224(toll-like receptor signaling pathway); GO:0001774(microglial cell activation); GO:0005794(Golgi apparatus); GO:0005886(plasma membrane); GO:0031410(cytoplasmic vesicle); GO:0045121(membrane raft); GO:0001819(positive reg…	signal transduction; immune response; toll-like receptor signaling pathway; microglial cell activation; positive regulation of cytokine production; inflammatory response; regulation of tumor necrosis factor production; innate immune response; defense response; positive regulation of tumor necrosis factor production; positive regulation of interleukin-6 production; positive regulation of interleuk…	protein binding; transmembrane signaling receptor activity; NAD+ nucleotidase, cyclic ADP-ribose generating; signaling receptor activity; Toll-like receptor 2 binding; identical protein binding; triacyl lipopeptide binding; lipopeptide binding	membrane; Golgi apparatus; plasma membrane; cytoplasmic vesicle; membrane raft; phagocytic vesicle membrane; Toll-like receptor 1-Toll-like receptor 2 protein complex; receptor complex; phagocytic vesicle
ENSMUSG00000015053	-2.37722	0.713756	3.4494	0.0632749	0.999996	130	9	5	16	4.67313	0.446997	0.1919	0.797293	2.64292	0.468942	Gata2	GATA binding protein 2 [Source:MGI Symbol;Acc:MGI:95662]	GO:0006355(regulation of DNA-templated transcription); GO:0005634(nucleus); GO:0008270(zinc ion binding); GO:0003700(DNA-binding transcription factor activity); GO:0043565(sequence-specific DNA binding); GO:0006357(regulation of transcription by RNA polymerase II); GO:0000981(DNA-binding transcription factor activity, RNA polymerase II-specific); GO:0001892(embryonic placenta development); GO:004…	regulation of DNA-templated transcription; regulation of transcription by RNA polymerase II; embryonic placenta development; positive regulation of transcription by RNA polymerase II; positive regulation of angiogenesis; negative regulation of transcription by RNA polymerase II; positive regulation of neuron differentiation; angiogenesis; myeloid cell differentiation; brown fat cell differentiati…	zinc ion binding; DNA-binding transcription factor activity; sequence-specific DNA binding; DNA-binding transcription factor activity, RNA polymerase II-specific; protein binding; RNA polymerase II cis-regulatory region sequence-specific DNA binding; chromatin binding; metal ion binding; DNA binding; DNA-binding transcription activator activity, RNA polymerase II-specific; transcription coactivat…	nucleus; nucleoplasm; transcription regulator complex; cytoplasm
ENSMUSG00000036469	2.36214	1.08546	1.74232	0.186845	0.999996	36	0	160	12	1.2941	0	6.14081	0.59797	0.70395	3.44277	Marchf1	membrane associated ring-CH-type finger 1 [Source:MGI Symbol;Acc:MGI:1920175]	GO:0008270(zinc ion binding); GO:0016020(membrane); GO:0005794(Golgi apparatus); GO:0046872(metal ion binding); GO:0006955(immune response); GO:0005886(plasma membrane); GO:0005789(endoplasmic reticulum membrane); GO:0005765(lysosomal membrane); GO:0005768(endosome); GO:0031902(late endosome membrane); GO:0016740(transferase activity); GO:0016567(protein ubiquitination); GO:0000209(protein polyub…	immune response; protein ubiquitination; protein polyubiquitination; immune system process; antigen processing and presentation of peptide antigen via MHC class II	zinc ion binding; metal ion binding; transferase activity; ubiquitin-protein transferase activity; ubiquitin protein ligase activity; MHC protein binding	membrane; Golgi apparatus; plasma membrane; endoplasmic reticulum membrane; lysosomal membrane; endosome; late endosome membrane; cytoplasm; lysosome; early endosome membrane; trans-Golgi network membrane; cytoplasmic vesicle; endoplasmic reticulum; intracellular membrane-bounded organelle
ENSMUSG00000090958	-2.35972	-0.339578	6.37133	0.0115979	0.999996	49	11	4	6	1.76141	0.54633	0.15352	0.298985	1.19452	0.218687	Lrrc32	leucine rich repeat containing 32 [Source:MGI Symbol;Acc:MGI:93882]	GO:0005515(protein binding); GO:0010628(positive regulation of gene expression); GO:0005615(extracellular space); GO:0009897(external side of plasma membrane); GO:0005886(plasma membrane); GO:0009986(cell surface); GO:0019838(growth factor binding); GO:0031012(extracellular matrix); GO:0046007(negative regulation of activated T cell proliferation); GO:0050431(transforming growth factor beta bindi…	positive regulation of gene expression; negative regulation of activated T cell proliferation; negative regulation of cytokine production; transforming growth factor beta receptor signaling pathway; establishment of protein localization to extracellular region; secondary palate development	protein binding; growth factor binding; transforming growth factor beta binding; receptor ligand inhibitor activity	extracellular space; external side of plasma membrane; plasma membrane; cell surface; extracellular matrix; nucleoplasm
ENSMUSG00000117569	2.34618	-1.28456	4.54754	0.0329662	0.999996	0	4.58	11.8	13.17	0	0.227472	0.452885	0.656272	0.0973715	0.546427	Gm49987	predicted gene, 49987 [Source:MGI Symbol;Acc:MGI:6275268]
ENSMUSG00000133437	-2.3433	-0.38109	1.02592	0.31112	0.999996	0	47.64	11.78	0	0	2.36611	0.452117	0	1.10008	0.248945		novel transcript
ENSMUSG00000034000	-2.34054	0.246012	0.966005	0.325678	0.999996	99	0	18	0	3.55877	0	0.690841	0	1.86897	0.376838	Neu4	sialidase 4 [Source:MGI Symbol;Acc:MGI:2661364]	GO:0004308(exo-alpha-sialidase activity); GO:0005739(mitochondrion); GO:0042995(cell projection); GO:0005886(plasma membrane); GO:0005783(endoplasmic reticulum); GO:0005789(endoplasmic reticulum membrane); GO:0016798(hydrolase activity, acting on glycosyl bonds); GO:0043005(neuron projection); GO:0005737(cytoplasm); GO:0005764(lysosome); GO:0005743(mitochondrial inner membrane); GO:0005741(mitoch…	lipid catabolic process; negative regulation of neuron projection development; glycoprotein catabolic process; ganglioside catabolic process; oligosaccharide catabolic process	exo-alpha-sialidase activity; hydrolase activity, acting on glycosyl bonds; exo-alpha-(2->3)-sialidase activity; exo-alpha-(2->6)-sialidase activity; exo-alpha-(2->8)-sialidase activity	mitochondrion; cell projection; plasma membrane; endoplasmic reticulum; endoplasmic reticulum membrane; neuron projection; cytoplasm; lysosome; mitochondrial inner membrane; mitochondrial outer membrane; membrane; lysosomal lumen; organelle inner membrane
ENSMUSG00000005397	-2.33788	1.30855	8.86673	0.00290415	0.999996	157	46	20	16	5.64371	2.28465	0.767601	0.797293	4.01152	0.781425	Nid1	nidogen 1 [Source:MGI Symbol;Acc:MGI:97342]	GO:0005509(calcium ion binding); GO:0007160(cell-matrix adhesion); GO:0005515(protein binding); GO:0005886(plasma membrane); GO:0071944(cell periphery); GO:0007155(cell adhesion); GO:0005576(extracellular region); GO:0031012(extracellular matrix); GO:0062023(collagen-containing extracellular matrix); GO:0005604(basement membrane); GO:0010811(positive regulation of cell-substrate adhesion); GO:003…	cell-matrix adhesion; cell adhesion; positive regulation of cell-substrate adhesion; extracellular matrix organization; canonical Wnt signaling pathway; positive regulation of cell adhesion; positive regulation of muscle cell differentiation; regulation of basement membrane organization; positive regulation of integrin-mediated signaling pathway; glomerular basement membrane development	calcium ion binding; protein binding; collagen binding; extracellular matrix structural constituent; Wnt-protein binding; extracellular matrix binding; Wnt receptor activity; laminin binding; laminin-1 binding; proteoglycan binding	plasma membrane; cell periphery; extracellular region; extracellular matrix; collagen-containing extracellular matrix; basement membrane; protein complex involved in cell-matrix adhesion
ENSMUSG00000042265	2.33145	-0.265309	1.0672	0.301579	0.999996	13	0	63	0	0.467313	0	2.41794	0	0.262318	1.2732	Trem1	triggering receptor expressed on myeloid cells 1 [Source:MGI Symbol;Acc:MGI:1930005]	GO:0016020(membrane); GO:0005886(plasma membrane); GO:0002250(adaptive immune response); GO:0045087(innate immune response); GO:0030593(neutrophil chemotaxis); GO:0010666(positive regulation of cardiac muscle cell apoptotic process); GO:0010759(positive regulation of macrophage chemotaxis); GO:0001954(positive regulation of cell-matrix adhesion); GO:1990266(neutrophil migration); GO:0070945(neutr…	adaptive immune response; innate immune response; neutrophil chemotaxis; positive regulation of cardiac muscle cell apoptotic process; positive regulation of macrophage chemotaxis; positive regulation of cell-matrix adhesion; neutrophil migration; neutrophil-mediated killing of gram-negative bacterium; neutrophil extravasation		membrane; plasma membrane
ENSMUSG00000036103	2.32211	5.34409	7.18914	0.00733459	0.999996	396	257	3068	347	14.2351	12.7643	117.75	17.2913	13.5067	67.6046	Colec12	collectin sub-family member 12 [Source:MGI Symbol;Acc:MGI:2152907]	GO:0016020(membrane); GO:0046872(metal ion binding); GO:0005581(collagen trimer); GO:0030246(carbohydrate binding); GO:0038023(signaling receptor activity); GO:0062023(collagen-containing extracellular matrix); GO:0030169(low-density lipoprotein particle binding); GO:0038187(pattern recognition receptor activity); GO:0006955(immune response); GO:0006910(phagocytosis, recognition); GO:0005044(scav…	immune response; phagocytosis, recognition; toll-like receptor 3 signaling pathway; defense response to bacterium; plasma membrane raft organization; cellular response to exogenous dsRNA	metal ion binding; carbohydrate binding; signaling receptor activity; low-density lipoprotein particle binding; pattern recognition receptor activity; scavenger receptor activity	membrane; collagen trimer; collagen-containing extracellular matrix
ENSMUSG00000024743	-2.30113	2.1971	3.68277	0.0549775	0.999996	384	21	33	35	13.8037	1.04299	1.26654	1.74408	7.52776	1.4938	Syt7	synaptotagmin VII [Source:MGI Symbol;Acc:MGI:1859545]	GO:0016020(membrane); GO:0005544(calcium-dependent phospholipid binding); GO:0042995(cell projection); GO:0046872(metal ion binding); GO:0005886(plasma membrane); GO:0030424(axon); GO:0005509(calcium ion binding); GO:0005765(lysosomal membrane); GO:0031410(cytoplasmic vesicle); GO:0045202(synapse); GO:0005829(cytosol); GO:0098978(glutamatergic synapse); GO:0005764(lysosome); GO:0005515(protein bi…	exocytosis; vesicle fusion; phagocytosis; regulation of insulin secretion; positive regulation of calcium ion-dependent exocytosis; plasma membrane repair; calcium-ion regulated exocytosis; regulation of dopamine secretion; vesicle-mediated cholesterol transport; regulation of synaptic vesicle endocytosis; regulation of phagocytosis; regulation of glucagon secretion; regulation of bone remodeling…	calcium-dependent phospholipid binding; metal ion binding; calcium ion binding; protein binding; calmodulin binding; phosphatidylserine binding; SNARE binding; phosphatidylinositol-4,5-bisphosphate binding; clathrin binding; syntaxin binding	membrane; cell projection; plasma membrane; axon; lysosomal membrane; cytoplasmic vesicle; synapse; cytosol; glutamatergic synapse; lysosome; phagocytic vesicle membrane; peroxisome; presynaptic membrane; synaptic vesicle; synaptic vesicle membrane; peroxisomal membrane; GABA-ergic synapse; neuronal cell body; hippocampal mossy fiber to CA3 synapse; dense core granule; dendrite; early phagosome; …
ENSMUSG00000001741	2.30106	1.22119	3.95392	0.0467624	0.999996	33	6	167	20	1.18626	0.297998	6.40947	0.996616	0.779382	3.76966	Il16	interleukin 16 [Source:MGI Symbol;Acc:MGI:1270855]	GO:0005515(protein binding); GO:0005125(cytokine activity); GO:0005634(nucleus); GO:0005737(cytoplasm); GO:0005576(extracellular region); GO:0005615(extracellular space); GO:0007165(signal transduction); GO:0006935(chemotaxis); GO:0062023(collagen-containing extracellular matrix); GO:0030595(leukocyte chemotaxis); GO:0050930(induction of positive chemotaxis); GO:0042609(CD4 receptor binding); GO:…	signal transduction; chemotaxis; leukocyte chemotaxis; induction of positive chemotaxis; positive regulation of interleukin-1 alpha production; positive regulation of interleukin-12 production; positive regulation of interleukin-6 production; positive regulation of inflammatory response; regulation of calcium ion transport	protein binding; cytokine activity; CD4 receptor binding	nucleus; cytoplasm; extracellular region; extracellular space; collagen-containing extracellular matrix; cytosol; plasma membrane; focal adhesion; nuclear speck; Flemming body
ENSMUSG00000025468	-2.29412	1.6192	3.3388	0.0676638	0.999996	251	16	12	31	9.02274	0.794662	0.460561	1.54475	5.005	0.969127	Caly	calcyon neuron-specific vesicular protein [Source:MGI Symbol;Acc:MGI:1915816]	GO:0016020(membrane); GO:0032051(clathrin light chain binding); GO:0007212(dopamine receptor signaling pathway); GO:0048268(clathrin coat assembly); GO:0044877(protein-containing complex binding); GO:0030424(axon); GO:0005886(plasma membrane); GO:0031410(cytoplasmic vesicle); GO:0030659(cytoplasmic vesicle membrane); GO:0098978(glutamatergic synapse); GO:0005768(endosome); GO:0006897(endocytosis)…	dopamine receptor signaling pathway; clathrin coat assembly; endocytosis; endosomal transport; positive regulation of endocytosis; anterograde axonal transport; postsynaptic neurotransmitter receptor internalization; positive regulation of clathrin coat assembly; positive regulation of retrograde axon cargo transport	clathrin light chain binding; protein-containing complex binding	membrane; axon; plasma membrane; cytoplasmic vesicle; cytoplasmic vesicle membrane; glutamatergic synapse; endosome; axon cytoplasm; postsynaptic endocytic zone
ENSMUSG00000040254	-2.29108	3.23453	2.39916	0.1214	0.999996	826	23	143	16	29.6924	1.14233	5.48835	0.797293	15.5368	3.20848	Sema3d	sema domain, immunoglobulin domain (Ig), short basic domain, secreted, (semaphorin) 3D [Source:MGI Symbol;Acc:MGI:1860118]	GO:0005515(protein binding); GO:0030215(semaphorin receptor binding); GO:0005886(plasma membrane); GO:0005615(extracellular space); GO:0007399(nervous system development); GO:0030154(cell differentiation); GO:0005576(extracellular region); GO:0007411(axon guidance); GO:0050919(negative chemotaxis); GO:0030335(positive regulation of cell migration); GO:0045499(chemorepellent activity); GO:0001755(…	nervous system development; cell differentiation; axon guidance; negative chemotaxis; positive regulation of cell migration; neural crest cell migration; semaphorin-plexin signaling pathway	protein binding; semaphorin receptor binding; chemorepellent activity	plasma membrane; extracellular space; extracellular region; membrane
ENSMUSG00000079414	2.29086	-0.925328	7.36908	0.00663548	0.999996	4	3	25	10	0.143789	0.148999	0.959502	0.498308	0.146037	0.745132	Gm11110	predicted gene 11110 [Source:MGI Symbol;Acc:MGI:3779362]
ENSMUSG00000031103	2.28843	2.02539	4.5543	0.0328361	0.999996	24	37	299	34	0.862732	1.83766	11.4756	1.69425	1.31945	6.6592	Elf4	E74 like ETS transcription factor 4 [Source:MGI Symbol;Acc:MGI:1928377]	GO:0006355(regulation of DNA-templated transcription); GO:0003700(DNA-binding transcription factor activity); GO:0043565(sequence-specific DNA binding); GO:0006357(regulation of transcription by RNA polymerase II); GO:0005634(nucleus); GO:0045944(positive regulation of transcription by RNA polymerase II); GO:0003677(DNA binding); GO:0000981(DNA-binding transcription factor activity, RNA polymeras…	regulation of DNA-templated transcription; regulation of transcription by RNA polymerase II; positive regulation of transcription by RNA polymerase II; positive regulation of DNA-templated transcription; negative regulation of inflammatory response; negative regulation of tumor necrosis factor production; negative regulation of interleukin-6 production; natural killer cell proliferation; negative…	DNA-binding transcription factor activity; sequence-specific DNA binding; DNA binding; DNA-binding transcription factor activity, RNA polymerase II-specific; RNA polymerase II cis-regulatory region sequence-specific DNA binding; DNA-binding transcription activator activity, RNA polymerase II-specific; sequence-specific double-stranded DNA binding	nucleus; PML body; nucleoplasm; nuclear body
ENSMUSG00000052087	2.27546	-0.270733	3.36482	0.0666029	0.999996	12	1	54	7	0.431366	0.0496664	2.07252	0.348816	0.263893	1.25681	Rgs14	regulator of G-protein signaling 14 [Source:MGI Symbol;Acc:MGI:1859709]	GO:0007165(signal transduction); GO:0005096(GTPase activator activity); GO:0008017(microtubule binding); GO:0030695(GTPase regulator activity); GO:0008277(regulation of G protein-coupled receptor signaling pathway); GO:0001965(G-protein alpha-subunit binding); GO:0005634(nucleus); GO:0050769(positive regulation of neurogenesis); GO:0048008(platelet-derived growth factor receptor signaling pathway…	signal transduction; regulation of G protein-coupled receptor signaling pathway; positive regulation of neurogenesis; platelet-derived growth factor receptor signaling pathway; negative regulation of signal transduction; G protein-coupled receptor signaling pathway; cell division; negative regulation of ERK1 and ERK2 cascade; response to oxidative stress; nucleocytoplasmic transport; visual learn…	GTPase activator activity; microtubule binding; GTPase regulator activity; G-protein alpha-subunit binding; protein binding; protein kinase binding; signaling receptor complex adaptor activity; GDP-dissociation inhibitor activity; GTPase activating protein binding	nucleus; cytoplasm; cell projection; plasma membrane; centrosome; synapse; cytoskeleton; glutamatergic synapse; dendrite; microtubule; PML body; spindle; postsynaptic density; dendritic spine; nuclear body; spindle pole
ENSMUSG00000070031	2.27475	1.16575	3.58472	0.0583132	0.999996	27.92	9	168.97	12	1.00365	0.446997	6.48508	0.59797	0.749108	3.61645	Sp140	Sp140 nuclear body protein [Source:MGI Symbol;Acc:MGI:3702467]	GO:0003677(DNA binding); GO:0005634(nucleus); GO:0005515(protein binding); GO:0005737(cytoplasm); GO:0046872(metal ion binding)		DNA binding; protein binding; metal ion binding	nucleus; cytoplasm
ENSMUSG00000085314	-2.27214	-1.2798	7.14288	0.00752623	0.999996	15	11	3	2	0.539208	0.54633	0.11514	0.0996616	0.54242	0.108296	Gm14866	predicted gene 14866 [Source:MGI Symbol;Acc:MGI:3704514]
ENSMUSG00000081683	-2.26608	0.694226	4.23926	0.0394994	0.999996	109	22	4	18	3.91824	1.09266	0.15352	0.896954	2.56215	0.494313	Fzd10	frizzled class receptor 10 [Source:MGI Symbol;Acc:MGI:2136761]	GO:0005515(protein binding); GO:0016020(membrane); GO:0007166(cell surface receptor signaling pathway); GO:0004888(transmembrane signaling receptor activity); GO:0016055(Wnt signaling pathway); GO:0005886(plasma membrane); GO:0004930(G protein-coupled receptor activity); GO:0007186(G protein-coupled receptor signaling pathway); GO:0017147(Wnt-protein binding); GO:0060070(canonical Wnt signaling p…	cell surface receptor signaling pathway; Wnt signaling pathway; G protein-coupled receptor signaling pathway; canonical Wnt signaling pathway; non-canonical Wnt signaling pathway; regulation of actin cytoskeleton organization; positive regulation of JNK cascade	protein binding; transmembrane signaling receptor activity; G protein-coupled receptor activity; Wnt-protein binding; Wnt receptor activity	membrane; plasma membrane; nucleoplasm; cytoplasm; cell surface
ENSMUSG00000010175	-2.26548	1.59543	2.29352	0.129915	0.999996	260	5	40	9	9.34627	0.248332	1.5352	0.448477	4.90561	1.02447	Prox1	prospero homeobox 1 [Source:MGI Symbol;Acc:MGI:97772]	GO:0003677(DNA binding); GO:0006355(regulation of DNA-templated transcription); GO:0005634(nucleus); GO:0043565(sequence-specific DNA binding); GO:0045944(positive regulation of transcription by RNA polymerase II); GO:0000122(negative regulation of transcription by RNA polymerase II); GO:0006366(transcription by RNA polymerase II); GO:0008283(cell population proliferation); GO:0000978(RNA polymer…	regulation of DNA-templated transcription; positive regulation of transcription by RNA polymerase II; negative regulation of transcription by RNA polymerase II; transcription by RNA polymerase II; cell population proliferation; nervous system development; regulation of transcription by RNA polymerase II; rhythmic process; negative regulation of DNA-templated transcription; circadian rhythm; inner…	DNA binding; sequence-specific DNA binding; RNA polymerase II cis-regulatory region sequence-specific DNA binding; DNA-binding transcription factor activity, RNA polymerase II-specific; protein binding; DNA-binding transcription factor activity; transcription cis-regulatory region binding; DNA-binding transcription repressor activity, RNA polymerase II-specific; nuclear receptor binding; DNA bind…	nucleus; cytoplasm; nucleoplasm; cytosol
ENSMUSG00000069072	-2.26307	-0.222017	1.4195	0.233485	0.999996	67	1	13	0	2.40846	0.0496664	0.498941	0	1.30397	0.274176	Slc7a14	solute carrier family 7 (cationic amino acid transporter, y+ system), member 14 [Source:MGI Symbol;Acc:MGI:3040688]	GO:0016020(membrane); GO:0022857(transmembrane transporter activity); GO:0055085(transmembrane transport); GO:0005886(plasma membrane); GO:0005765(lysosomal membrane); GO:0005764(lysosome); GO:0006865(amino acid transport); GO:0003333(amino acid transmembrane transport); GO:1905039(carboxylic acid transmembrane transport); GO:0051939(gamma-aminobutyric acid import); GO:0015171(amino acid transmem…	transmembrane transport; amino acid transport; amino acid transmembrane transport; carboxylic acid transmembrane transport; gamma-aminobutyric acid import	transmembrane transporter activity; amino acid transmembrane transporter activity; gamma-aminobutyric acid transmembrane transporter activity	membrane; plasma membrane; lysosomal membrane; lysosome; nucleoplasm; cytosol; intracellular membrane-bounded organelle
ENSMUSG00000052889	2.26092	2.48081	2.44532	0.117876	0.999996	88	12	452	15	3.16335	0.595997	17.3478	0.747462	1.9426	9.14244	Prkcb	protein kinase C, beta [Source:MGI Symbol;Acc:MGI:97596]	GO:0005634(nucleus); GO:0005515(protein binding); GO:0046627(negative regulation of insulin receptor signaling pathway); GO:0005737(cytoplasm); GO:0005524(ATP binding); GO:0016020(membrane); GO:0008270(zinc ion binding); GO:0046872(metal ion binding); GO:0002250(adaptive immune response); GO:0006338(chromatin remodeling); GO:0004674(protein serine/threonine kinase activity); GO:0006325(chromatin …	negative regulation of insulin receptor signaling pathway; adaptive immune response; chromatin remodeling; chromatin organization; intracellular signal transduction; apoptotic process; response to xenobiotic stimulus; B cell activation; positive regulation of DNA-templated transcription; regulation of transcription by RNA polymerase II; intracellular calcium ion homeostasis; calcium ion transport…	protein binding; ATP binding; zinc ion binding; metal ion binding; protein serine/threonine kinase activity; protein serine kinase activity; chromatin binding; nuclear receptor coactivator activity; histone binding; diacylglycerol-dependent serine/threonine kinase activity; calcium channel regulator activity; nuclear androgen receptor binding; histone H3T6 kinase activity; protein kinase activity…	nucleus; cytoplasm; membrane; plasma membrane; centrosome; brush border membrane; presynaptic cytosol; calyx of Held; spectrin; nucleoplasm; cytosol
ENSMUSG00000036067	2.25743	1.96864	4.58331	0.0322848	0.999996	44	21	288	31	1.58168	1.04299	11.0535	1.54475	1.32924	6.37413	Slc2a6	solute carrier family 2 (facilitated glucose transporter), member 6 [Source:MGI Symbol;Acc:MGI:2443286]	GO:0016020(membrane); GO:0022857(transmembrane transporter activity); GO:0055085(transmembrane transport); GO:0005765(lysosomal membrane); GO:0005764(lysosome); GO:0006110(regulation of glycolytic process)	transmembrane transport; regulation of glycolytic process	transmembrane transporter activity	membrane; lysosomal membrane; lysosome
ENSMUSG00000024663	2.24066	3.4033	3.68224	0.0549949	0.999996	145	42	833	52	5.21234	2.08599	31.9706	2.5912	3.69627	17.373	Rab3il1	RAB3A interacting protein (rabin3)-like 1 [Source:MGI Symbol;Acc:MGI:1922010]	GO:0005085(guanyl-nucleotide exchange factor activity); GO:0015031(protein transport); GO:0006887(exocytosis); GO:0019900(kinase binding); GO:0070319(Golgi to plasma membrane transport vesicle); GO:0042802(identical protein binding)	protein transport; exocytosis	guanyl-nucleotide exchange factor activity; kinase binding; identical protein binding	Golgi to plasma membrane transport vesicle
ENSMUSG00000031636	-2.23178	-0.215284	7.37182	0.00662539	0.999996	48	16	5	7	1.72546	0.794662	0.1919	0.348816	1.28982	0.262509	Pdlim3	PDZ and LIM domain 3 [Source:MGI Symbol;Acc:MGI:1859274]	GO:0005515(protein binding); GO:0007507(heart development); GO:0005737(cytoplasm); GO:0046872(metal ion binding); GO:0007015(actin filament organization); GO:0030018(Z disc); GO:0003779(actin binding); GO:0005912(adherens junction); GO:0030036(actin cytoskeleton organization); GO:0042805(actinin binding); GO:0051371(muscle alpha-actinin binding); GO:0061061(muscle structure development); GO:00017…	heart development; actin filament organization; actin cytoskeleton organization; muscle structure development	protein binding; metal ion binding; actin binding; actinin binding; muscle alpha-actinin binding; cytoskeletal protein binding; structural constituent of muscle	cytoplasm; Z disc; adherens junction; stress fiber; filamentous actin; actin cytoskeleton; cytosol
ENSMUSG00000021200	2.22779	0.327063	1.61686	0.20353	0.999996	22	0	92	5	0.790838	0	3.53097	0.249154	0.437358	1.95626	Asb2	ankyrin repeat and SOCS box-containing 2 [Source:MGI Symbol;Acc:MGI:1929743]	GO:0005515(protein binding); GO:0035556(intracellular signal transduction); GO:0005737(cytoplasm); GO:0006511(ubiquitin-dependent protein catabolic process); GO:0016567(protein ubiquitination); GO:0005856(cytoskeleton); GO:0030036(actin cytoskeleton organization); GO:0035914(skeletal muscle cell differentiation); GO:0030018(Z disc); GO:0001725(stress fiber); GO:0000151(ubiquitin ligase complex); …	intracellular signal transduction; ubiquitin-dependent protein catabolic process; protein ubiquitination; actin cytoskeleton organization; skeletal muscle cell differentiation; proteasome-mediated ubiquitin-dependent protein catabolic process; cardiac muscle cell differentiation; skeletal muscle atrophy; heart looping; cardiac muscle cell development; podosome assembly; dendritic cell migration	protein binding; cullin family protein binding; ubiquitin protein ligase activity	cytoplasm; cytoskeleton; Z disc; stress fiber; ubiquitin ligase complex
ENSMUSG00000032436	2.22658	2.38148	4.88828	0.0270396	0.999996	42	42	380	45	1.50978	2.08599	14.5844	2.24239	1.78291	8.48881	Cmtm7	CKLF-like MARVEL transmembrane domain containing 7 [Source:MGI Symbol;Acc:MGI:2447166]	GO:0016020(membrane); GO:0005125(cytokine activity); GO:0005615(extracellular space); GO:0007165(signal transduction); GO:0006935(chemotaxis); GO:0002337(B-1a B cell differentiation)	signal transduction; chemotaxis; B-1a B cell differentiation	cytokine activity	membrane; extracellular space
ENSMUSG00000092178	-2.22066	6.11211	1.95343	0.162217	0.999996	5859.19	338.26	31.72	954.79	210.621	16.8001	1.21742	47.5779	113.827	24.2922	Gm45351	predicted gene 45351 [Source:MGI Symbol;Acc:MGI:5791187]
ENSMUSG00000035352	2.2087	0.4766	1.99612	0.157703	0.999996	25	0	91	15	0.89868	0	3.49259	0.747462	0.494966	2.17149	Ccl12	C-C motif chemokine ligand 12 [Source:MGI Symbol;Acc:MGI:108224]	GO:0005576(extracellular region); GO:0006955(immune response); GO:0008009(chemokine activity); GO:0005615(extracellular space); GO:0005125(cytokine activity); GO:0007165(signal transduction); GO:0006954(inflammatory response); GO:0006935(chemotaxis); GO:0060326(cell chemotaxis); GO:0061844(antimicrobial humoral immune response mediated by antimicrobial peptide); GO:0048020(CCR chemokine receptor …	immune response; signal transduction; inflammatory response; chemotaxis; cell chemotaxis; antimicrobial humoral immune response mediated by antimicrobial peptide; positive regulation of cell migration; eosinophil chemotaxis; chemokine-mediated signaling pathway; positive regulation of leukocyte migration; angiogenesis; negative regulation of leukocyte proliferation; calcium ion transport; intrace…	chemokine activity; cytokine activity; CCR chemokine receptor binding; CCR2 chemokine receptor binding; protein kinase activity; phospholipase activator activity	extracellular region; extracellular space
ENSMUSG00000045404	2.20418	0.55043	2.47558	0.115627	0.999996	21	4	111	4	0.754891	0.198666	4.26019	0.199323	0.504814	2.30276	Kcnk13	potassium channel, subfamily K, member 13 [Source:MGI Symbol;Acc:MGI:2384976]	GO:0016020(membrane); GO:0005267(potassium channel activity); GO:0071805(potassium ion transmembrane transport); GO:0005886(plasma membrane); GO:0034220(monoatomic ion transmembrane transport); GO:0034702(monoatomic ion channel complex); GO:0015271(outward rectifier potassium channel activity); GO:0022841(potassium ion leak channel activity); GO:0030322(stabilization of membrane potential)	potassium ion transmembrane transport; monoatomic ion transmembrane transport; stabilization of membrane potential	potassium channel activity; outward rectifier potassium channel activity; potassium ion leak channel activity	membrane; plasma membrane; monoatomic ion channel complex
ENSMUSG00000003411	-2.19454	0.258306	3.26277	0.0708695	0.999996	92	5	11	7	3.30714	0.248332	0.422181	0.348816	1.85513	0.388803	Rab3b	RAB3B, member RAS oncogene family [Source:MGI Symbol;Acc:MGI:1917158]	GO:0003924(GTPase activity); GO:0005525(GTP binding); GO:0005515(protein binding); GO:0005794(Golgi apparatus); GO:0005886(plasma membrane); GO:0015031(protein transport); GO:0012505(endomembrane system); GO:0005768(endosome); GO:0006886(intracellular protein transport); GO:0030672(synaptic vesicle membrane); GO:0006887(exocytosis); GO:0099503(secretory vesicle); GO:0008021(synaptic vesicle); GO:…	protein transport; intracellular protein transport; exocytosis; protein localization to plasma membrane; protein secretion; regulation of exocytosis; vesicle docking involved in exocytosis; antigen processing and presentation; positive regulation of dopamine uptake involved in synaptic transmission; regulation of vesicle size; regulation of synaptic vesicle cycle	GTPase activity; GTP binding; protein binding; GTP-dependent protein binding; myosin V binding; nucleotide binding; GDP binding	Golgi apparatus; plasma membrane; endomembrane system; endosome; synaptic vesicle membrane; secretory vesicle; synaptic vesicle; secretory granule; cytoplasm; vesicle; perinuclear region of cytoplasm; dopaminergic synapse
ENSMUSG00000027555	2.19267	0.855846	3.77074	0.0521566	0.999996	24	7	129	13	0.862732	0.347665	4.95103	0.6478	0.628989	2.86516	Car13	carbonic anhydrase 13 [Source:MGI Symbol;Acc:MGI:1931322]	GO:0008270(zinc ion binding); GO:0004089(carbonate dehydratase activity); GO:0005829(cytosol); GO:0046872(metal ion binding); GO:0005737(cytoplasm); GO:0016829(lyase activity); GO:0043209(myelin sheath); GO:0043231(intracellular membrane-bounded organelle); GO:0006730(one-carbon metabolic process)	one-carbon metabolic process	zinc ion binding; carbonate dehydratase activity; metal ion binding; lyase activity	cytosol; cytoplasm; myelin sheath; intracellular membrane-bounded organelle
ENSMUSG00000070780	2.17622	1.16773	3.82238	0.0505724	0.999996	29	10	162	16	1.04247	0.496664	6.21757	0.797293	0.792279	3.57703	Rbm47	RNA binding motif protein 47 [Source:MGI Symbol;Acc:MGI:2384294]	GO:0003723(RNA binding); GO:0003676(nucleic acid binding); GO:0005634(nucleus); GO:0005515(protein binding); GO:0005737(cytoplasm); GO:0003729(mRNA binding); GO:0008380(RNA splicing); GO:0006397(mRNA processing); GO:0002244(hematopoietic progenitor cell differentiation); GO:0003730(mRNA 3'-UTR binding); GO:0032733(positive regulation of interleukin-10 production); GO:0070935(3'-UTR-mediated mRNA …	RNA splicing; mRNA processing; hematopoietic progenitor cell differentiation; positive regulation of interleukin-10 production; 3'-UTR-mediated mRNA stabilization; cytidine to uridine editing; regulation of alternative mRNA splicing, via spliceosome; positive regulation of type I interferon-mediated signaling pathway	RNA binding; nucleic acid binding; protein binding; mRNA binding; mRNA 3'-UTR binding; enzyme-substrate adaptor activity; enzyme binding	nucleus; cytoplasm; apolipoprotein B mRNA editing enzyme complex
ENSMUSG00000025701	2.17582	1.22924	4.77281	0.0289127	0.999996	15	22	159	25	0.539208	1.09266	6.10243	1.24577	0.792912	3.73433	Alox5	arachidonate 5-lipoxygenase [Source:MGI Symbol;Acc:MGI:87999]	GO:0046872(metal ion binding); GO:0005515(protein binding); GO:0016702(oxidoreductase activity, acting on single donors with incorporation of molecular oxygen, incorporation of two atoms of oxygen); GO:0034440(lipid oxidation); GO:0005506(iron ion binding); GO:0005634(nucleus); GO:0006954(inflammatory response); GO:0005737(cytoplasm); GO:0006629(lipid metabolic process); GO:0016020(membrane); GO:…	lipid oxidation; inflammatory response; lipid metabolic process; arachidonic acid metabolic process; leukotriene biosynthetic process; long-chain fatty acid metabolic process; icosanoid metabolic process; leukotriene metabolic process; negative regulation of angiogenesis; regulation of reactive oxygen species biosynthetic process; positive regulation of bone mineralization; negative regulation of…	metal ion binding; protein binding; oxidoreductase activity, acting on single donors with incorporation of molecular oxygen, incorporation of two atoms of oxygen; iron ion binding; hydrolase activity; dioxygenase activity; arachidonate 8(S)-lipoxygenase activity; arachidonate 12(S)-lipoxygenase activity; arachidonate 5-lipoxygenase activity	nucleus; cytoplasm; membrane; cytosol; sarcolemma; nuclear membrane; nuclear matrix; perinuclear region of cytoplasm; dendrite; nuclear envelope; nuclear envelope lumen; nucleoplasm
ENSMUSG00000036218	-2.17493	1.13187	2.14168	0.143345	0.999996	183	4	31	6	6.57833	0.198666	1.18978	0.298985	3.48921	0.775158	Pdzrn4	PDZ domain containing RING finger 4 [Source:MGI Symbol;Acc:MGI:3056996]	GO:0005515(protein binding); GO:0046872(metal ion binding)		protein binding; metal ion binding
ENSMUSG00000024529	2.1737	2.21057	4.88424	0.0271029	0.999996	24	49	311	58	0.862732	2.43365	11.9362	2.89019	1.6044	7.47517	Lox	lysyl oxidase [Source:MGI Symbol;Acc:MGI:96817]	GO:0005507(copper ion binding); GO:0016641(oxidoreductase activity, acting on the CH-NH2 group of donors, oxygen as acceptor); GO:0030324(lung development); GO:0005515(protein binding); GO:0055001(muscle cell development); GO:0010468(regulation of gene expression); GO:0051898(negative regulation of phosphatidylinositol 3-kinase/protein kinase B signal transduction); GO:0007507(heart development);…	lung development; muscle cell development; regulation of gene expression; negative regulation of phosphatidylinositol 3-kinase/protein kinase B signal transduction; heart development; regulation of apoptotic process; osteoblast differentiation; response to hormone; aorta development; bone mineralization; collagen fibril organization; blood vessel development; regulation of transforming growth fac…	copper ion binding; oxidoreductase activity, acting on the CH-NH2 group of donors, oxygen as acceptor; protein binding; metal ion binding; oxidoreductase activity; protein-lysine 6-oxidase activity; collagen binding; small molecule binding; molecular adaptor activity	extracellular space; extracellular region; collagen-containing extracellular matrix; extracellular matrix; collagen trimer
ENSMUSG00000002257	2.16529	1.64957	4.37385	0.0364943	0.999996	31	22	226	25	1.11436	1.09266	8.67389	1.24577	1.10427	5.03175	Def6	differentially expressed in FDCP 6 [Source:MGI Symbol;Acc:MGI:1346328]	GO:0098876(vesicle-mediated transport to the plasma membrane); GO:0005654(nucleoplasm); GO:0005829(cytosol); GO:0005634(nucleus); GO:0042995(cell projection); GO:0005737(cytoplasm); GO:0005886(plasma membrane); GO:0005856(cytoskeleton); GO:0005515(protein binding); GO:0030175(filopodium); GO:0005911(cell-cell junction); GO:0048471(perinuclear region of cytoplasm)	vesicle-mediated transport to the plasma membrane	protein binding	nucleoplasm; cytosol; nucleus; cell projection; cytoplasm; plasma membrane; cytoskeleton; filopodium; cell-cell junction; perinuclear region of cytoplasm
ENSMUSG00000000031	-2.16026	3.19629	1.55189	0.212857	0.999996	805	12	164	6	28.9375	0.595997	6.29433	0.298985	14.8902	3.37725	H19	H19, imprinted maternally expressed transcript [Source:MGI Symbol;Acc:MGI:95891]	GO:0035195(miRNA-mediated post-transcriptional gene silencing); GO:0016442(RISC complex)	miRNA-mediated post-transcriptional gene silencing		RISC complex
ENSMUSG00000049551	-2.15602	0.755163	2.20329	0.137716	0.999996	133	7	27	2	4.78098	0.347665	1.03626	0.0996616	2.65103	0.604044	Fzd9	frizzled class receptor 9 [Source:MGI Symbol;Acc:MGI:1313278]	GO:0005515(protein binding); GO:0016020(membrane); GO:0007166(cell surface receptor signaling pathway); GO:0004888(transmembrane signaling receptor activity); GO:0016055(Wnt signaling pathway); GO:0005794(Golgi apparatus); GO:0005886(plasma membrane); GO:0005789(endoplasmic reticulum membrane); GO:0004930(G protein-coupled receptor activity); GO:0007186(G protein-coupled receptor signaling pathwa…	cell surface receptor signaling pathway; Wnt signaling pathway; G protein-coupled receptor signaling pathway; regulation of cell cycle; B cell differentiation; ossification; positive regulation of apoptotic process; regulation of cytosolic calcium ion concentration; neuroblast proliferation; positive regulation of canonical Wnt signaling pathway; negative regulation of neuron apoptotic process; p…	protein binding; transmembrane signaling receptor activity; G protein-coupled receptor activity; Wnt-protein binding; Wnt receptor activity; protein homodimerization activity; protein heterodimerization activity	membrane; Golgi apparatus; plasma membrane; endoplasmic reticulum membrane; mitochondrial membrane; glutamatergic synapse; perinuclear region of cytoplasm; postsynapse; filopodium membrane; cytoplasm; cell surface
ENSMUSG00000097141	2.138	-0.534643	7.06747	0.00784961	0.999996	5.23	5.19	34.1	13.05	0.188004	0.257768	1.30876	0.650292	0.218433	0.999561	Gm10524	predicted gene 10524 [Source:MGI Symbol;Acc:MGI:3642791]
ENSMUSG00000119972	2.13149	-0.0532033	3.97235	0.0462532	0.999996	12	4	63	8	0.431366	0.198666	2.41794	0.398646	0.32849	1.45771	Gm6634	predicted gene 6634 [Source:MGI Symbol;Acc:MGI:3643829]
ENSMUSG00000031497	2.12865	0.79241	3.63499	0.0565771	0.999996	25	6	120	14	0.89868	0.297998	4.60561	0.697631	0.626137	2.71384	Tnfsf13b	tumor necrosis factor (ligand) superfamily, member 13b [Source:MGI Symbol;Acc:MGI:1344376]	GO:0005515(protein binding); GO:0016020(membrane); GO:0006955(immune response); GO:0005164(tumor necrosis factor receptor binding); GO:0043588(skin development); GO:0005615(extracellular space); GO:0005886(plasma membrane); GO:0005576(extracellular region); GO:0005125(cytokine activity); GO:0042100(B cell proliferation); GO:0030890(positive regulation of B cell proliferation); GO:0050776(regulati…	immune response; skin development; B cell proliferation; positive regulation of B cell proliferation; regulation of immune response; B cell differentiation; germinal center formation; T cell proliferation; B cell homeostasis; tumor necrosis factor-mediated signaling pathway; T cell costimulation; positive regulation of T cell proliferation; transitional one stage B cell differentiation; positive …	protein binding; tumor necrosis factor receptor binding; cytokine activity; receptor ligand activity	membrane; extracellular space; plasma membrane; extracellular region; cytoplasm; focal adhesion; intracellular membrane-bounded organelle; perinuclear region of cytoplasm
ENSMUSG00000010307	2.1194	3.22519	3.90023	0.0482796	0.999996	123	50	709	57	4.4215	2.48332	27.2115	2.84036	3.48305	15.1131	Tmem86a	transmembrane protein 86A [Source:MGI Symbol;Acc:MGI:1915143]	GO:0016020(membrane); GO:0006629(lipid metabolic process); GO:0005783(endoplasmic reticulum); GO:0005789(endoplasmic reticulum membrane); GO:0016787(hydrolase activity); GO:0047408(alkenylglycerophosphocholine hydrolase activity)	lipid metabolic process	hydrolase activity; alkenylglycerophosphocholine hydrolase activity	membrane; endoplasmic reticulum; endoplasmic reticulum membrane
ENSMUSG00000026430	2.11588	1.2354	3.67705	0.0551663	0.999996	26	15	171	15	0.934627	0.744996	6.56299	0.747462	0.847447	3.72746	Rassf5	Ras association (RalGDS/AF-6) domain family member 5 [Source:MGI Symbol;Acc:MGI:1926375]	GO:0007165(signal transduction); GO:0005634(nucleus); GO:0005515(protein binding); GO:0005737(cytoplasm); GO:0046872(metal ion binding); GO:0005856(cytoskeleton); GO:0005874(microtubule); GO:0006915(apoptotic process); GO:0031398(positive regulation of protein ubiquitination); GO:0046651(lymphocyte proliferation); GO:0050672(negative regulation of lymphocyte proliferation); GO:1900180(regulation …	signal transduction; apoptotic process; positive regulation of protein ubiquitination; lymphocyte proliferation; negative regulation of lymphocyte proliferation; regulation of protein localization to nucleus	protein binding; metal ion binding	nucleus; cytoplasm; cytoskeleton; microtubule
ENSMUSG00000028369	-2.10535	-1.34505	5.26882	0.0217107	0.999996	14	10	1	4	0.503261	0.496664	0.0383801	0.199323	0.500296	0.10956	Svep1	sushi, von Willebrand factor type A, EGF and pentraxin domain containing 1 [Source:MGI Symbol;Acc:MGI:1928849]	GO:0005509(calcium ion binding); GO:0010467(gene expression); GO:0005634(nucleus); GO:0005515(protein binding); GO:0016477(cell migration); GO:0003682(chromatin binding); GO:0005737(cytoplasm); GO:0016020(membrane); GO:0005615(extracellular space); GO:0007155(cell adhesion); GO:0005576(extracellular region); GO:0031012(extracellular matrix); GO:0008544(epidermis development); GO:0001945(lymph ves…	gene expression; cell migration; cell adhesion; epidermis development; lymph vessel development; lymph circulation; lymph vessel morphogenesis; Tie signaling pathway; epithelial cell-cell adhesion; tight junction organization; cell-matrix adhesion; positive regulation of platelet activation; negative regulation of vasoconstriction; negative regulation of complement activation, classical pathway	calcium ion binding; protein binding; chromatin binding; integrin binding; integrin binding involved in cell-matrix adhesion	nucleus; cytoplasm; membrane; extracellular space; extracellular region; extracellular matrix
ENSMUSG00000023008	2.09564	2.40215	2.77695	0.0956303	0.999996	62	34	415	17	2.22873	1.68866	15.9277	0.847123	1.97179	8.47965	Fmnl3	formin-like 3 [Source:MGI Symbol;Acc:MGI:109569]	GO:0031267(small GTPase binding); GO:0003779(actin binding); GO:0007010(cytoskeleton organization); GO:0016043(cellular component organization); GO:0030036(actin cytoskeleton organization); GO:0022604(regulation of cell morphogenesis); GO:0005515(protein binding); GO:0005737(cytoplasm); GO:0005886(plasma membrane); GO:0005829(cytosol); GO:0008360(regulation of cell shape); GO:0051015(actin filame…	cytoskeleton organization; cellular component organization; actin cytoskeleton organization; regulation of cell morphogenesis; regulation of cell shape; angiogenesis; cell migration; cortical actin cytoskeleton organization; filopodium assembly	small GTPase binding; actin binding; protein binding; actin filament binding; GTPase activating protein binding	cytoplasm; plasma membrane; cytosol; Golgi apparatus; intracellular membrane-bounded organelle
ENSMUSG00000034708	2.09258	7.07707	5.75947	0.0164001	0.999996	1101	1267	9935	1121	39.5778	62.9273	381.306	55.8603	51.2218	218.668	Grn	granulin [Source:MGI Symbol;Acc:MGI:95832]	GO:0005739(mitochondrion); GO:0005515(protein binding); GO:0045202(synapse); GO:0007566(embryo implantation); GO:0010976(positive regulation of neuron projection development); GO:0060041(retina development in camera-type eye); GO:0050679(positive regulation of epithelial cell proliferation); GO:0050673(epithelial cell proliferation); GO:0016020(membrane); GO:0005794(Golgi apparatus); GO:0005615(e…	embryo implantation; positive regulation of neuron projection development; retina development in camera-type eye; positive regulation of epithelial cell proliferation; epithelial cell proliferation; signal transduction; regulation of inflammatory response; protein stabilization; positive regulation of cell population proliferation; neural precursor cell proliferation; positive regulation of dendr…	protein binding; cytokine activity; protein-folding chaperone binding	mitochondrion; synapse; membrane; Golgi apparatus; extracellular space; plasma membrane; endoplasmic reticulum; lysosomal membrane; extracellular region; lysosome; late endosome; presynapse; glutamatergic synapse; trans-Golgi network; vesicle; cerebellar climbing fiber to Purkinje cell synapse; endosome
ENSMUSG00000142697	2.08438	-0.622569	2.22794	0.135534	0.999996	11.67	0	8.5	31.14	0.419504	0	0.326231	1.55173	0.236098	0.8996		novel transcript
ENSMUSG00000092624	-2.08241	3.35554	2.23453	0.134957	0.999996	778.48	96.2	9.13	148.34	27.9842	4.77791	0.35041	7.3919	16.4729	3.78477	Gm3654	predicted gene 3654 [Source:MGI Symbol;Acc:MGI:3781830]
ENSMUSG00000040710	2.07966	0.577975	0.98726	0.320413	0.999996	29	0	115	1	1.04247	0	4.41371	0.0498308	0.571329	2.31004	St8sia4	ST8 alpha-N-acetyl-neuraminide alpha-2,8-sialyltransferase 4 [Source:MGI Symbol;Acc:MGI:106018]	GO:0006486(protein glycosylation); GO:0008373(sialyltransferase activity); GO:0016020(membrane); GO:0016757(glycosyltransferase activity); GO:0000139(Golgi membrane); GO:0005794(Golgi apparatus); GO:0005576(extracellular region); GO:0006491(N-glycan processing); GO:0003828(alpha-N-acetylneuraminate alpha-2,8-sialyltransferase activity); GO:0009311(oligosaccharide metabolic process); GO:0097503(si…	protein glycosylation; N-glycan processing; oligosaccharide metabolic process; sialylation; ganglioside biosynthetic process	sialyltransferase activity; glycosyltransferase activity; alpha-N-acetylneuraminate alpha-2,8-sialyltransferase activity; transferase activity	membrane; Golgi membrane; Golgi apparatus; extracellular region
ENSMUSG00000104252	-2.06989	0.648492	2.48285	0.115093	0.999996	121.4	6.53	23.19	4.29	4.36399	0.324321	0.890034	0.213774	2.42852	0.578414	Pcdha4	protocadherin alpha 4 [Source:MGI Symbol;Acc:MGI:1298406]	GO:0016020(membrane); GO:0005509(calcium ion binding); GO:0007156(homophilic cell adhesion via plasma membrane adhesion molecules); GO:0007155(cell adhesion); GO:0005886(plasma membrane); GO:0005515(protein binding); GO:0045202(synapse); GO:0046872(metal ion binding); GO:0005783(endoplasmic reticulum); GO:0042802(identical protein binding)	homophilic cell adhesion via plasma membrane adhesion molecules; cell adhesion	calcium ion binding; protein binding; metal ion binding; identical protein binding	membrane; plasma membrane; synapse; endoplasmic reticulum
ENSMUSG00000064080	-2.06908	0.449628	5.07032	0.0243389	0.999996	23	68	14	9	0.826785	3.37731	0.537321	0.448477	2.04167	0.496588	Fbln2	fibulin 2 [Source:MGI Symbol;Acc:MGI:95488]	GO:0005576(extracellular region); GO:0005509(calcium ion binding); GO:0005515(protein binding); GO:0062023(collagen-containing extracellular matrix); GO:0010811(positive regulation of cell-substrate adhesion); GO:0005201(extracellular matrix structural constituent); GO:0050840(extracellular matrix binding)	positive regulation of cell-substrate adhesion	calcium ion binding; protein binding; extracellular matrix structural constituent; extracellular matrix binding	extracellular region; collagen-containing extracellular matrix
ENSMUSG00000123116	2.06738	-0.224381	3.79968	0.0512625	0.999996	13	2	51	10	0.467313	0.0993328	1.95738	0.498308	0.305061	1.26672		novel transcript
ENSMUSG00000038963	2.06633	1.57933	2.36752	0.123884	0.999996	19	31	232	8	0.682996	1.53966	8.90417	0.398646	1.08099	4.73806	Slco4a1	solute carrier organic anion transporter family, member 4a1 [Source:MGI Symbol;Acc:MGI:1351866]	GO:0005515(protein binding); GO:0016020(membrane); GO:0022857(transmembrane transporter activity); GO:0055085(transmembrane transport); GO:0005886(plasma membrane); GO:0015347(sodium-independent organic anion transmembrane transporter activity); GO:0006811(monoatomic ion transport); GO:0043252(sodium-independent organic anion transport); GO:0016323(basolateral plasma membrane); GO:0042403(thyroid…	transmembrane transport; monoatomic ion transport; sodium-independent organic anion transport; thyroid hormone metabolic process; thyroid hormone transport; prostaglandin transport	protein binding; transmembrane transporter activity; sodium-independent organic anion transmembrane transporter activity; prostaglandin transmembrane transporter activity; organic anion transmembrane transporter activity; thyroid hormone transmembrane transporter activity	membrane; plasma membrane; basolateral plasma membrane
ENSMUSG00000034488	-2.06467	-0.0316951	1.12212	0.289463	0.999996	76	1	17	0	2.73199	0.0496664	0.652461	0	1.46993	0.356393	Edil3	EGF-like repeats and discoidin I-like domains 3 [Source:MGI Symbol;Acc:MGI:1329025]	GO:0005509(calcium ion binding); GO:0046872(metal ion binding); GO:0007155(cell adhesion); GO:0005576(extracellular region); GO:0010811(positive regulation of cell-substrate adhesion)	cell adhesion; positive regulation of cell-substrate adhesion	calcium ion binding; metal ion binding	extracellular region
ENSMUSG00000031661	-2.05762	1.75351	2.39616	0.121633	0.999996	275	12	51	11	9.88548	0.595997	1.95738	0.548139	5.34352	1.28991	Nkd1	naked cuticle 1 [Source:MGI Symbol;Acc:MGI:2135954]	GO:0005509(calcium ion binding); GO:0030178(negative regulation of Wnt signaling pathway); GO:0005737(cytoplasm); GO:0046872(metal ion binding); GO:0005886(plasma membrane); GO:0030154(cell differentiation); GO:0016055(Wnt signaling pathway); GO:0005515(protein binding); GO:0007283(spermatogenesis); GO:0090090(negative regulation of canonical Wnt signaling pathway); GO:0043410(positive regulation…	negative regulation of Wnt signaling pathway; cell differentiation; Wnt signaling pathway; spermatogenesis; negative regulation of canonical Wnt signaling pathway; positive regulation of MAPK cascade; axis elongation; positive regulation of protein catabolic process; convergent extension; positive regulation of non-canonical Wnt signaling pathway; positive regulation of Wnt signaling pathway, pla…	calcium ion binding; metal ion binding; protein binding; PDZ domain binding	cytoplasm; plasma membrane; protein phosphatase type 2A complex
ENSMUSG00000072720	-2.05598	1.00636	3.55008	0.0595425	0.999996	152	13	20	14	5.46397	0.645663	0.767601	0.697631	3.13758	0.735093	Myo18b	myosin XVIIIb [Source:MGI Symbol;Acc:MGI:1921626]	GO:0005524(ATP binding); GO:0005515(protein binding); GO:0003774(cytoskeletal motor activity); GO:0016459(myosin complex); GO:0001701(in utero embryonic development); GO:0055013(cardiac muscle cell development); GO:0005737(cytoplasm); GO:0003779(actin binding); GO:0051015(actin filament binding); GO:0001570(vasculogenesis); GO:0030018(Z disc); GO:0031941(filamentous actin); GO:0032982(myosin fila…	in utero embryonic development; cardiac muscle cell development; vasculogenesis; actomyosin structure organization	ATP binding; protein binding; cytoskeletal motor activity; actin binding; actin filament binding	myosin complex; cytoplasm; Z disc; filamentous actin; myosin filament; myosin II complex; unconventional myosin complex
ENSMUSG00000038859	-2.05034	-0.0589783	2.97596	0.0845098	0.999996	63	10	2	12	2.26467	0.496664	0.0767601	0.59797	1.43363	0.312383	Baiap2l1	BAI1-associated protein 2-like 1 [Source:MGI Symbol;Acc:MGI:1914148]	GO:0005515(protein binding); GO:0030833(regulation of actin filament polymerization); GO:0007009(plasma membrane organization); GO:0005737(cytoplasm); GO:0005654(nucleoplasm); GO:0005829(cytosol); GO:0005856(cytoskeleton); GO:0015629(actin cytoskeleton); GO:0003779(actin binding); GO:0032956(regulation of actin cytoskeleton organization); GO:0051017(actin filament bundle assembly); GO:0070064(pro…	regulation of actin filament polymerization; plasma membrane organization; regulation of actin cytoskeleton organization; actin filament bundle assembly; actin crosslink formation; positive regulation of actin filament polymerization	protein binding; actin binding; proline-rich region binding	cytoplasm; nucleoplasm; cytosol; cytoskeleton; actin cytoskeleton; plasma membrane
ENSMUSG00000117286	-2.04994	0.558972	2.2211	0.136136	0.999996	106.44	11.58	1.77	20.09	3.82622	0.575137	0.0679327	1.0011	2.27197	0.495741	Gm1043	predicted gene 1043 [Source:MGI Symbol;Acc:MGI:2685889]
ENSMUSG00000063434	-2.03402	-0.339799	2.10694	0.146632	0.999996	58	2	11	2	2.08494	0.0993328	0.422181	0.0996616	1.1597	0.276854	Sorcs3	sortilin-related VPS10 domain containing receptor 3 [Source:MGI Symbol;Acc:MGI:1913923]	GO:0005515(protein binding); GO:0016020(membrane); GO:0014069(postsynaptic density); GO:0098978(glutamatergic synapse); GO:0007613(memory); GO:0098839(postsynaptic density membrane); GO:1900452(regulation of long-term synaptic depression); GO:0007612(learning); GO:0099170(postsynaptic modulation of chemical synaptic transmission)	memory; regulation of long-term synaptic depression; learning; postsynaptic modulation of chemical synaptic transmission	protein binding	membrane; postsynaptic density; glutamatergic synapse; postsynaptic density membrane
ENSMUSG00000115149	-2.03279	-0.153693	8.38231	0.00378891	0.999996	38	25	6.28	8	1.36599	1.24166	0.241027	0.398646	1.30777	0.312281	9330188P03Rik	RIKEN cDNA 9330188P03 gene [Source:MGI Symbol;Acc:MGI:2686435]
ENSMUSG00000032517	-2.03107	0.806697	2.47394	0.115747	0.999996	139	5	19	11	4.99666	0.248332	0.729221	0.548139	2.71374	0.645467	Mobp	myelin-associated oligodendrocytic basic protein [Source:MGI Symbol;Acc:MGI:108511]	GO:0005739(mitochondrion); GO:0005737(cytoplasm); GO:0048471(perinuclear region of cytoplasm); GO:0043209(myelin sheath); GO:0005829(cytosol); GO:0019911(structural constituent of myelin sheath); GO:0007399(nervous system development); GO:0032289(central nervous system myelin formation)	nervous system development; central nervous system myelin formation	structural constituent of myelin sheath	mitochondrion; cytoplasm; perinuclear region of cytoplasm; myelin sheath; cytosol
ENSMUSG00000027009	2.03057	2.26445	2.09426	0.147853	0.999996	87	11	372	16	3.1274	0.54633	14.2774	0.797293	1.90108	7.62803	Itga4	integrin alpha 4 [Source:MGI Symbol;Acc:MGI:96603]	GO:0007155(cell adhesion); GO:0008305(integrin complex); GO:0016020(membrane); GO:0005886(plasma membrane); GO:0007229(integrin-mediated signaling pathway); GO:0001968(fibronectin binding); GO:0003823(antigen binding); GO:0019960(C-X3-C chemokine binding); GO:0050839(cell adhesion molecule binding); GO:1990405(protein antigen binding); GO:0002687(positive regulation of leukocyte migration); GO:00…	cell adhesion; integrin-mediated signaling pathway; positive regulation of leukocyte migration; cell-matrix adhesion involved in ameboidal cell migration; leukocyte cell-cell adhesion; cell-matrix adhesion; cell-cell adhesion mediated by integrin; heterotypic cell-cell adhesion; substrate adhesion-dependent cell spreading; endodermal cell differentiation; receptor clustering; negative regulation …	fibronectin binding; antigen binding; C-X3-C chemokine binding; cell adhesion molecule binding; protein antigen binding	integrin complex; membrane; plasma membrane; cell surface; growth cone; neuronal cell body; integrin alpha4-beta1 complex; integrin alpha4-beta7 complex
ENSMUSG00000031425	-2.00389	5.08199	5.08515	0.0241315	0.999996	2618	281	446	197	94.1097	13.9563	17.1175	9.81667	54.133	13.4962	Plp1	proteolipid protein (myelin) 1 [Source:MGI Symbol;Acc:MGI:97623]	GO:0016020(membrane); GO:0010628(positive regulation of gene expression); GO:0005515(protein binding); GO:0042552(myelination); GO:0006954(inflammatory response); GO:0044877(protein-containing complex binding); GO:0005886(plasma membrane); GO:0043209(myelin sheath); GO:0061564(axon development); GO:0030335(positive regulation of cell migration); GO:0022010(central nervous system myelination); GO:…	positive regulation of gene expression; myelination; inflammatory response; axon development; positive regulation of cell migration; central nervous system myelination; glial cell differentiation; astrocyte development; axon ensheathment; long-chain fatty acid biosynthetic process; AMPA selective glutamate receptor signaling pathway; positive regulation of calcium ion transmembrane transport	protein binding; protein-containing complex binding; structural constituent of myelin sheath	membrane; plasma membrane; myelin sheath; integrin alphav-beta3 complex
ENSMUSG00000079657	-1.99572	2.17701	6.21674	0.0126548	0.999996	113	205	32	47	4.06203	10.1816	1.22816	2.34205	7.06885	1.76098	Rab26	RAB26, member RAS oncogene family [Source:MGI Symbol;Acc:MGI:2443284]	GO:0003924(GTPase activity); GO:0005525(GTP binding); GO:0000166(nucleotide binding); GO:0005515(protein binding); GO:0016020(membrane); GO:0000139(Golgi membrane); GO:0005794(Golgi apparatus); GO:0005886(plasma membrane); GO:0015031(protein transport); GO:0031410(cytoplasmic vesicle); GO:0005768(endosome); GO:0030658(transport vesicle membrane); GO:0017157(regulation of exocytosis); GO:0045055(r…	protein transport; regulation of exocytosis; regulated exocytosis; Golgi to plasma membrane protein transport; exocrine system development; regulation protein catabolic process at presynapse	GTPase activity; GTP binding; nucleotide binding; protein binding; GMP binding	membrane; Golgi membrane; Golgi apparatus; plasma membrane; cytoplasmic vesicle; endosome; transport vesicle membrane; secretory granule membrane; synaptic vesicle membrane
ENSMUSG00000056888	1.99224	2.88688	3.88601	0.04869	0.999996	95	49	537	54	3.41498	2.43365	20.6101	2.69086	2.94204	11.7318	Glipr1	GLI pathogenesis related 1 [Source:MGI Symbol;Acc:MGI:1920940]	GO:0005576(extracellular region); GO:0016020(membrane); GO:0005615(extracellular space)			extracellular region; membrane; extracellular space
ENSMUSG00000020901	1.99119	2.6521	4.80949	0.0283034	0.999996	95	31	415	77	3.41498	1.53966	15.9277	3.83697	2.51547	9.94628	Pik3r5	phosphoinositide-3-kinase regulatory subunit 5 [Source:MGI Symbol;Acc:MGI:2443588]	GO:0046935(1-phosphatidylinositol-3-kinase regulator activity); GO:0005944(phosphatidylinositol 3-kinase complex, class IB); GO:0005634(nucleus); GO:0005737(cytoplasm); GO:0016020(membrane); GO:0005886(plasma membrane); GO:0007186(G protein-coupled receptor signaling pathway); GO:0016301(kinase activity); GO:0031683(G-protein beta/gamma-subunit complex binding); GO:0005942(phosphatidylinositol 3-…	G protein-coupled receptor signaling pathway; phosphatidylinositol metabolic process; positive regulation of phosphatidylinositol 3-kinase/protein kinase B signal transduction; phosphatidylinositol 3-kinase/protein kinase B signal transduction; positive regulation of MAP kinase activity	1-phosphatidylinositol-3-kinase regulator activity; kinase activity; G-protein beta/gamma-subunit complex binding	phosphatidylinositol 3-kinase complex, class IB; nucleus; cytoplasm; membrane; plasma membrane; phosphatidylinositol 3-kinase complex; cytosol; centriolar satellite
ENSMUSG00000120496	-1.99063	0.389394	4.90067	0.0268462	0.999996	85	16	11	11	3.05551	0.794662	0.422181	0.548139	1.97977	0.479865	Gm56762	predicted gene, 56762 [Source:MGI Symbol;Acc:MGI:7337437]
ENSMUSG00000034981	-1.98894	0.709723	4.72397	0.0297449	0.999996	103	24	9	18	3.70256	1.19199	0.345421	0.896954	2.49861	0.59988	Parm1	prostate androgen-regulated mucin-like protein 1 [Source:MGI Symbol;Acc:MGI:2443349]	GO:0000139(Golgi membrane); GO:0005794(Golgi apparatus); GO:0005886(plasma membrane); GO:0005768(endosome); GO:0005770(late endosome); GO:0005769(early endosome); GO:0010008(endosome membrane); GO:0005654(nucleoplasm); GO:0005829(cytosol); GO:0043231(intracellular membrane-bounded organelle)			Golgi membrane; Golgi apparatus; plasma membrane; endosome; late endosome; early endosome; endosome membrane; nucleoplasm; cytosol; intracellular membrane-bounded organelle
ENSMUSG00000043613	-1.98675	0.0447355	1.51671	0.218118	0.999996	4	60	1	15	0.143789	2.97998	0.0383801	0.747462	1.47855	0.360243	Mmp3	matrix metallopeptidase 3 [Source:MGI Symbol;Acc:MGI:97010]	GO:0008270(zinc ion binding); GO:0006508(proteolysis); GO:0008237(metallopeptidase activity); GO:0004222(metalloendopeptidase activity); GO:0031012(extracellular matrix); GO:0071230(cellular response to amino acid stimulus); GO:0044877(protein-containing complex binding); GO:0046872(metal ion binding); GO:0005615(extracellular space); GO:0008233(peptidase activity); GO:0005576(extracellular regio…	proteolysis; cellular response to amino acid stimulus; innate immune response; extracellular matrix organization; positive regulation of cell migration; collagen catabolic process; regulation of cell migration; cellular response to UV-A; protein catabolic process; positive regulation of protein-containing complex assembly; cellular response to reactive oxygen species; negative regulation of phosp…	zinc ion binding; metallopeptidase activity; metalloendopeptidase activity; protein-containing complex binding; metal ion binding; peptidase activity; endopeptidase activity	extracellular matrix; extracellular space; extracellular region; dendrite; cell body; protein-containing complex; cytosol; mitochondrion
ENSMUSG00000037432	1.97714	-0.501353	7.01071	0.00810235	0.999996	7	5	20	25	0.25163	0.248332	0.767601	1.24577	0.250186	0.992078	Fer1l5	fer-1 like family member 5 [Source:MGI Symbol;Acc:MGI:3616091]	GO:0016020(membrane); GO:0046872(metal ion binding); GO:0005886(plasma membrane); GO:0006906(vesicle fusion); GO:0031410(cytoplasmic vesicle); GO:0001778(plasma membrane repair); GO:0002280(monocyte activation involved in immune response); GO:0002281(macrophage activation involved in immune response); GO:0033292(T-tubule organization); GO:0050765(negative regulation of phagocytosis); GO:0030315(T…	vesicle fusion; plasma membrane repair; monocyte activation involved in immune response; macrophage activation involved in immune response; T-tubule organization; negative regulation of phagocytosis	metal ion binding	membrane; plasma membrane; cytoplasmic vesicle; T-tubule
ENSMUSG00000009876	-1.97586	0.701023	8.04863	0.00455381	0.999996	82	39	13	15	2.94767	1.93699	0.498941	0.747462	2.46322	0.613689	Cox4i2	cytochrome c oxidase subunit 4I2 [Source:MGI Symbol;Acc:MGI:2135755]	GO:0005751(mitochondrial respiratory chain complex IV); GO:0006123(mitochondrial electron transport, cytochrome c to oxygen); GO:0005739(mitochondrion); GO:1902600(proton transmembrane transport); GO:0005743(mitochondrial inner membrane); GO:0006119(oxidative phosphorylation); GO:0031966(mitochondrial membrane); GO:0045277(respiratory chain complex IV); GO:0004129(cytochrome-c oxidase activity)	mitochondrial electron transport, cytochrome c to oxygen; proton transmembrane transport; oxidative phosphorylation	cytochrome-c oxidase activity	mitochondrial respiratory chain complex IV; mitochondrion; mitochondrial inner membrane; mitochondrial membrane; respiratory chain complex IV
ENSMUSG00000129919	-1.9757	2.97108	2.12912	0.144524	0.999996	628.3	41.31	16.41	113.2	22.5856	2.05172	0.629817	5.64085	12.4247	3.0626		novel transcript
ENSMUSG00000024349	1.9739	1.64097	2.81745	0.0932444	0.999996	32	26	232	14	1.15031	1.29133	8.90417	0.697631	1.21615	4.88241	Sting1	stimulator of interferon response cGAMP interactor 1 [Source:MGI Symbol;Acc:MGI:1919762]	GO:0002218(activation of innate immune response); GO:0032481(positive regulation of type I interferon production); GO:0045944(positive regulation of transcription by RNA polymerase II); GO:0005515(protein binding); GO:0010468(regulation of gene expression); GO:0035458(cellular response to interferon-beta); GO:0005737(cytoplasm); GO:0000139(Golgi membrane); GO:0005794(Golgi apparatus); GO:0005886(…	activation of innate immune response; positive regulation of type I interferon production; positive regulation of transcription by RNA polymerase II; regulation of gene expression; cellular response to interferon-beta; autophagy; monoatomic ion transmembrane transport; proton transmembrane transport; defense response to virus; innate immune response; autophagosome assembly; cellular response to o…	protein binding; nucleotide binding; proton channel activity; ubiquitin protein ligase binding; protein homodimerization activity; signaling adaptor activity; cyclic-di-GMP binding; 2',3'-cyclic GMP-AMP binding; protein kinase binding; identical protein binding; RNA polymerase II-specific DNA-binding transcription factor binding; iron-sulfur cluster binding; electron transfer activity; oxidoreduc…	cytoplasm; Golgi membrane; Golgi apparatus; plasma membrane; endoplasmic reticulum; endoplasmic reticulum membrane; lysosomal membrane; mitochondrion; autophagosome; cytoplasmic vesicle; autophagosome membrane; lysosome; perinuclear region of cytoplasm; mitochondrial outer membrane; endoplasmic reticulum-Golgi intermediate compartment membrane; peroxisome; STING complex; nucleoplasm; endosome; cy…
ENSMUSG00000085250	-1.95283	-0.858026	5.04212	0.0247382	0.999996	12	21.91	4.72	4	0.431366	1.08819	0.181154	0.199323	0.731397	0.189268	Gm15234	predicted gene 15234 [Source:MGI Symbol;Acc:MGI:3705137]
ENSMUSG00000039936	1.95162	2.79012	4.23448	0.0396108	0.999996	96	43	481	64	3.45093	2.13565	18.4608	3.18917	2.81785	10.8992	Pik3cd	phosphatidylinositol-4,5-bisphosphate 3-kinase catalytic subunit delta [Source:MGI Symbol;Acc:MGI:1098211]	GO:0016301(kinase activity); GO:0046854(phosphatidylinositol phosphate biosynthetic process); GO:0043491(phosphatidylinositol 3-kinase/protein kinase B signal transduction); GO:0016303(1-phosphatidylinositol-3-kinase activity); GO:0005829(cytosol); GO:0048015(phosphatidylinositol-mediated signaling); GO:0036092(phosphatidylinositol-3-phosphate biosynthetic process); GO:0046934(1-phosphatidylinosi…	phosphatidylinositol phosphate biosynthetic process; phosphatidylinositol 3-kinase/protein kinase B signal transduction; phosphatidylinositol-mediated signaling; phosphatidylinositol-3-phosphate biosynthetic process; positive regulation of endothelial cell proliferation; positive regulation of endothelial cell migration; positive regulation of gene expression; positive regulation of cell migratio…	kinase activity; 1-phosphatidylinositol-3-kinase activity; 1-phosphatidylinositol-4,5-bisphosphate 3-kinase activity; ATP binding; 1-phosphatidylinositol-4-phosphate 3-kinase activity	cytosol; phosphatidylinositol 3-kinase complex, class IA; cytoplasm; plasma membrane; phosphatidylinositol 3-kinase complex
ENSMUSG00000033579	-1.94813	0.1256	1.05936	0.303362	0.999996	86	0	18	2	3.09146	0	0.690841	0.0996616	1.63099	0.421221	Fa2h	fatty acid 2-hydroxylase [Source:MGI Symbol;Acc:MGI:2443327]	GO:0016020(membrane); GO:0016491(oxidoreductase activity); GO:0020037(heme binding); GO:0005506(iron ion binding); GO:0006629(lipid metabolic process); GO:0008610(lipid biosynthetic process); GO:0080132(fatty acid alpha-hydroxylase activity); GO:0046872(metal ion binding); GO:0005783(endoplasmic reticulum); GO:0005789(endoplasmic reticulum membrane); GO:0006665(sphingolipid metabolic process); GO…	lipid metabolic process; lipid biosynthetic process; sphingolipid metabolic process; fatty acid biosynthetic process; fatty acid metabolic process; establishment of skin barrier; ceramide biosynthetic process; glucosylceramide biosynthetic process; peripheral nervous system myelin maintenance; sebaceous gland cell differentiation; lipid modification; central nervous system myelin maintenance; reg…	oxidoreductase activity; heme binding; iron ion binding; fatty acid alpha-hydroxylase activity; metal ion binding	membrane; endoplasmic reticulum; endoplasmic reticulum membrane
ENSMUSG00000072591	-1.94692	0.569566	2.43204	0.118878	0.999996	109	9	5	19	3.91824	0.446997	0.1919	0.946785	2.25906	0.538928	Fzd10os	frizzled class receptor 10, opposite strand [Source:MGI Symbol;Acc:MGI:2442398]
ENSMUSG00000078898	-1.94553	3.60974	1.08388	0.297831	0.999996	435.7	459.75	260	0	15.6622	22.8341	9.97882	0	19.2237	5.08515	Zfp968	zinc finger protein 968 [Source:MGI Symbol;Acc:MGI:3782903]	GO:0006355(regulation of DNA-templated transcription); GO:0046872(metal ion binding); GO:0005634(nucleus); GO:0000978(RNA polymerase II cis-regulatory region sequence-specific DNA binding); GO:0006357(regulation of transcription by RNA polymerase II); GO:0003700(DNA-binding transcription factor activity); GO:0003677(DNA binding)	regulation of DNA-templated transcription; regulation of transcription by RNA polymerase II	metal ion binding; RNA polymerase II cis-regulatory region sequence-specific DNA binding; DNA-binding transcription factor activity; DNA binding	nucleus
ENSMUSG00000074272	1.94471	1.36519	5.18485	0.0227847	0.999996	25.13	23	159	35.43	0.903353	1.14233	6.10243	1.7655	1.01407	3.98498	Ceacam1	CEA cell adhesion molecule 1 [Source:MGI Symbol;Acc:MGI:1347245]	GO:0042995(cell projection); GO:0005886(plasma membrane); GO:0009897(external side of plasma membrane); GO:0042101(T cell receptor complex); GO:0009986(cell surface); GO:0002682(regulation of immune system process); GO:0031410(cytoplasmic vesicle); GO:0016328(lateral plasma membrane); GO:0016324(apical plasma membrane); GO:0070161(anchoring junction); GO:0030054(cell junction); GO:0005911(cell-ce…	regulation of immune system process; symbiont entry into host cell; signal transduction; regulation of cell growth; cell adhesion; negative regulation of granulocyte differentiation; cellular response to insulin stimulus; bile acid and bile salt transport; cell-cell junction organization; negative regulation of T cell proliferation; regulation of epidermal growth factor receptor signaling pathway…	protein binding; calmodulin binding; identical protein binding; protein kinase binding; protein homodimerization activity; protein dimerization activity; protein tyrosine kinase binding; bile acid transmembrane transporter activity; virus receptor activity; Toll-like receptor binding; granulocyte colony-stimulating factor receptor binding	cell projection; plasma membrane; external side of plasma membrane; T cell receptor complex; cell surface; cytoplasmic vesicle; lateral plasma membrane; apical plasma membrane; anchoring junction; cell junction; cell-cell junction; membrane; microvillus membrane; adherens junction; transport vesicle; basal plasma membrane; ciliary membrane
ENSMUSG00000127251	1.93778	4.74099	5.00485	0.0252763	0.999996	121.5	356.62	1699.47	386.95	4.36758	17.712	65.2258	19.282	10.9623	42.3148		novel transcript, antisense to Cep85
ENSMUSG00000134664	-1.93038	-0.709461	6.29544	0.0121049	0.999996	18	21	6	4	0.647049	1.04299	0.23028	0.199323	0.828903	0.216415		novel transcript
ENSMUSG00000072620	1.92909	2.65625	5.2709	0.0216847	0.999996	73	51	412	77	2.62414	2.53299	15.8126	3.83697	2.58038	9.88844	Slfn2	schlafen 2 [Source:MGI Symbol;Acc:MGI:1313258]	GO:0009617(response to bacterium); GO:0008285(negative regulation of cell population proliferation); GO:0005737(cytoplasm); GO:0002250(adaptive immune response); GO:0000049(tRNA binding); GO:0036416(tRNA stabilization); GO:0042098(T cell proliferation); GO:0002456(T cell mediated immunity); GO:0002309(T cell proliferation involved in immune response)	response to bacterium; negative regulation of cell population proliferation; adaptive immune response; tRNA stabilization; T cell proliferation; T cell mediated immunity; T cell proliferation involved in immune response	tRNA binding	cytoplasm
ENSMUSG00000039377	1.92695	0.867318	2.38821	0.122254	0.999996	19	15	134	6	0.682996	0.744996	5.14293	0.298985	0.711283	2.79635	Hlx	H2.0-like homeobox [Source:MGI Symbol;Acc:MGI:96109]	GO:0003677(DNA binding); GO:0006355(regulation of DNA-templated transcription); GO:0000981(DNA-binding transcription factor activity, RNA polymerase II-specific); GO:0043565(sequence-specific DNA binding); GO:0050679(positive regulation of epithelial cell proliferation); GO:0001889(liver development); GO:0007519(skeletal muscle tissue development); GO:0008283(cell population proliferation); GO:00…	regulation of DNA-templated transcription; positive regulation of epithelial cell proliferation; liver development; skeletal muscle tissue development; cell population proliferation; epithelial cell proliferation; regulation of transcription by RNA polymerase II; cell differentiation; organ growth; positive regulation of organ growth; embryonic digestive tract morphogenesis; T-helper 2 cell diffe…	DNA binding; DNA-binding transcription factor activity, RNA polymerase II-specific; sequence-specific DNA binding	nucleus
ENSMUSG00000019846	-1.92562	-0.685635	5.97523	0.0145082	0.999996	30	12	5	5	1.07842	0.595997	0.1919	0.249154	0.856528	0.217546	Lama4	laminin, alpha 4 [Source:MGI Symbol;Acc:MGI:109321]	GO:0007155(cell adhesion); GO:0005102(signaling receptor binding); GO:0030155(regulation of cell adhesion); GO:0030334(regulation of cell migration); GO:0045995(regulation of embryonic development); GO:0050873(brown fat cell differentiation); GO:0005576(extracellular region); GO:0005604(basement membrane); GO:0120163(negative regulation of cold-induced thermogenesis); GO:0001568(blood vessel deve…	cell adhesion; regulation of cell adhesion; regulation of cell migration; regulation of embryonic development; brown fat cell differentiation; negative regulation of cold-induced thermogenesis; blood vessel development	signaling receptor binding; extracellular matrix structural constituent	extracellular region; basement membrane; collagen-containing extracellular matrix; neuromuscular junction; synaptic cleft
ENSMUSG00000030793	1.91914	2.35055	3.50977	0.0610078	0.999996	69	34	361	39	2.48036	1.68866	13.8552	1.9434	2.10286	7.97629	Pycard	PYD and CARD domain containing [Source:MGI Symbol;Acc:MGI:1931465]	GO:0006954(inflammatory response); GO:0042981(regulation of apoptotic process); GO:0045087(innate immune response); GO:0009617(response to bacterium); GO:0005515(protein binding); GO:0006915(apoptotic process); GO:0060907(positive regulation of macrophage cytokine production); GO:0005829(cytosol); GO:0005737(cytoplasm); GO:0005634(nucleus); GO:0005783(endoplasmic reticulum); GO:0005739(mitochondr…	inflammatory response; regulation of apoptotic process; innate immune response; response to bacterium; apoptotic process; positive regulation of macrophage cytokine production; regulation of autophagy; pattern recognition receptor signaling pathway; positive regulation of interleukin-1 beta production; positive regulation of inflammatory response; protein homooligomerization; pyroptosis; regulati…	protein binding; identical protein binding; transmembrane transporter binding; protease binding; protein dimerization activity; protein homodimerization activity; peptidase activator activity involved in apoptotic process; interleukin-6 receptor binding; tropomyosin binding; myosin I binding; enzyme binding; Pyrin domain binding; BMP receptor binding	cytosol; cytoplasm; nucleus; endoplasmic reticulum; mitochondrion; extracellular region; neuronal cell body; canonical inflammasome complex; protein-containing complex; microtubule; NLRP3 inflammasome complex; AIM2 inflammasome complex; Golgi membrane; nucleoplasm; nucleolus; IkappaB kinase complex; NLRP1 inflammasome complex; NLRP6 inflammasome complex
ENSMUSG00000048721	1.90386	-0.0415947	4.72755	0.0296831	0.999996	7	10	54	14	0.25163	0.496664	2.07252	0.697631	0.36033	1.41928	Fndc9	fibronectin type III domain containing 9 [Source:MGI Symbol;Acc:MGI:2443410]	GO:0005515(protein binding); GO:0016020(membrane)		protein binding	membrane
ENSMUSG00000105895	-1.90109	-1.14831	5.16861	0.0229986	0.999996	12	15	4	3	0.431366	0.744996	0.15352	0.149492	0.573129	0.151729	Gm42829	predicted gene 42829 [Source:MGI Symbol;Acc:MGI:5662966]
ENSMUSG00000131339	-1.90109	-1.14831	5.16861	0.0229986	0.999996	12	15	4	3	0.431366	0.744996	0.15352	0.149492	0.573129	0.151729		novel transcript
ENSMUSG00000041607	-1.89757	5.13791	1.8395	0.175009	0.999996	2985	67	637	105	107.302	3.32765	24.4481	5.23223	55.4417	14.9098	Mbp	myelin basic protein [Source:MGI Symbol;Acc:MGI:96925]	GO:0019911(structural constituent of myelin sheath); GO:0007605(sensory perception of sound); GO:0042552(myelination); GO:0005634(nucleus); GO:0005737(cytoplasm); GO:0071944(cell periphery); GO:0005886(plasma membrane); GO:0043025(neuronal cell body); GO:0009986(cell surface); GO:0043209(myelin sheath); GO:0042995(cell projection); GO:0050771(negative regulation of axonogenesis); GO:0009636(respo…	sensory perception of sound; myelination; negative regulation of axonogenesis; response to toxic substance; membrane organization; response to progesterone; MAPK cascade; positive regulation of interleukin-6 production; negative regulation of heterotypic cell-cell adhesion; maintenance of blood-brain barrier; positive regulation of chemokine (C-X-C motif) ligand 2 production	structural constituent of myelin sheath; protease binding; calmodulin binding	nucleus; cytoplasm; cell periphery; plasma membrane; neuronal cell body; cell surface; myelin sheath; cell projection; compact myelin; internode region of axon; protein-containing complex
ENSMUSG00000020377	1.89649	0.991197	5.04426	0.0247077	0.999996	25	14	119	28	0.89868	0.695329	4.56723	1.39526	0.8054	3.02769	Ltc4s	leukotriene C4 synthase [Source:MGI Symbol;Acc:MGI:107498]	GO:0016020(membrane); GO:0008047(enzyme activator activity); GO:0006691(leukotriene metabolic process); GO:0005783(endoplasmic reticulum); GO:0005789(endoplasmic reticulum membrane); GO:0016740(transferase activity); GO:0005640(nuclear outer membrane); GO:0016829(lyase activity); GO:0019370(leukotriene biosynthetic process); GO:0004464(leukotriene-C4 synthase activity); GO:0042759(long-chain fatt…	leukotriene metabolic process; leukotriene biosynthetic process; long-chain fatty acid biosynthetic process; lipid metabolic process; cellular oxidant detoxification	enzyme activator activity; transferase activity; lyase activity; leukotriene-C4 synthase activity; protein-containing complex binding; glutathione transferase activity; glutathione peroxidase activity; glutathione binding; lipid binding	membrane; endoplasmic reticulum; endoplasmic reticulum membrane; nuclear outer membrane; nucleus; nuclear membrane; nuclear envelope
ENSMUSG00000027577	-1.89241	0.864556	1.74046	0.187081	0.999996	145	3	27	8	5.21234	0.148999	1.03626	0.398646	2.77629	0.73996	Chrna4	cholinergic receptor, nicotinic, alpha polypeptide 4 [Source:MGI Symbol;Acc:MGI:87888]	GO:0016020(membrane); GO:0006811(monoatomic ion transport); GO:0004888(transmembrane signaling receptor activity); GO:0005216(monoatomic ion channel activity); GO:0034220(monoatomic ion transmembrane transport); GO:0005230(extracellular ligand-gated monoatomic ion channel activity); GO:0045211(postsynaptic membrane); GO:0022848(acetylcholine-gated monoatomic cation-selective channel activity); GO…	monoatomic ion transport; monoatomic ion transmembrane transport; regulation of postsynaptic membrane potential; excitatory postsynaptic potential; synaptic transmission, cholinergic; response to hypoxia; DNA repair; response to oxidative stress; signal transduction; response to nicotine; behavioral response to nicotine; nervous system process; cognition; locomotory behavior; acetylcholine recept…	transmembrane signaling receptor activity; monoatomic ion channel activity; extracellular ligand-gated monoatomic ion channel activity; acetylcholine-gated monoatomic cation-selective channel activity; acetylcholine receptor activity; protein binding; protein-containing complex binding; transmitter-gated monoatomic ion channel activity involved in regulation of postsynaptic membrane potential; he…	membrane; postsynaptic membrane; plasma membrane; synapse; acetylcholine-gated channel complex; external side of plasma membrane; neuronal cell body; neuron projection; cholinergic synapse; postsynaptic specialization membrane; dendrite; protein-containing complex; presynaptic membrane; dopaminergic synapse
ENSMUSG00000073198	-1.88861	-0.866498	6.10345	0.0134918	0.999996	18.22	16.37	4.25	4.59	0.654958	0.813039	0.163115	0.228723	0.727149	0.192424	Bnip3l-ps	BCL2/adenovirus E1B interacting protein 3-like, pseudogene [Source:MGI Symbol;Acc:MGI:3642435]
ENSMUSG00000026344	-1.8846	0.942859	2.3551	0.124874	0.999996	143	11	32	6	5.14045	0.54633	1.22816	0.298985	2.9267	0.795288	Lypd1	Ly6/Plaur domain containing 1 [Source:MGI Symbol;Acc:MGI:1919835]	GO:0005886(plasma membrane); GO:0098552(side of membrane); GO:0005515(protein binding); GO:0030550(acetylcholine receptor inhibitor activity); GO:0095500(acetylcholine receptor signaling pathway); GO:0045202(synapse); GO:0016020(membrane); GO:0007271(synaptic transmission, cholinergic); GO:0001662(behavioral fear response); GO:0072659(protein localization to plasma membrane); GO:1903077(negative …	acetylcholine receptor signaling pathway; synaptic transmission, cholinergic; behavioral fear response; protein localization to plasma membrane; negative regulation of protein localization to plasma membrane; response to nicotine	protein binding; acetylcholine receptor inhibitor activity; acetylcholine receptor binding	plasma membrane; side of membrane; synapse; membrane
ENSMUSG00000054191	-1.88233	-0.965726	5.11204	0.0237603	0.999996	23	10	3	5	0.826785	0.496664	0.11514	0.249154	0.6765	0.174888	Klf1	Kruppel-like transcription factor 1 (erythroid) [Source:MGI Symbol;Acc:MGI:1342771]	GO:0005634(nucleus); GO:0003677(DNA binding); GO:0000976(transcription cis-regulatory region binding); GO:0000978(RNA polymerase II cis-regulatory region sequence-specific DNA binding); GO:0043130(ubiquitin binding); GO:0006355(regulation of DNA-templated transcription); GO:0006511(ubiquitin-dependent protein catabolic process); GO:0030218(erythrocyte differentiation); GO:0031648(protein destabil…	regulation of DNA-templated transcription; ubiquitin-dependent protein catabolic process; erythrocyte differentiation; protein destabilization; positive regulation of DNA-templated transcription; maternal process involved in female pregnancy; cellular response to peptide	DNA binding; transcription cis-regulatory region binding; RNA polymerase II cis-regulatory region sequence-specific DNA binding; ubiquitin binding	nucleus; nucleoplasm; chromatin
ENSMUSG00000117592	1.88009	-0.892463	5.99073	0.0143812	0.999996	4	5	18	15	0.143789	0.248332	0.690841	0.747462	0.1892	0.717124	Gm46603	predicted gene, 46603 [Source:MGI Symbol;Acc:MGI:5826240]
ENSMUSG00000019762	1.87826	-0.916	5.8496	0.0155806	0.999996	5	4	15	17	0.179736	0.198666	0.575701	0.847123	0.187957	0.7016	Iyd	iodotyrosine deiodinase [Source:MGI Symbol;Acc:MGI:1917587]	GO:0016491(oxidoreductase activity); GO:0005886(plasma membrane); GO:0031410(cytoplasmic vesicle); GO:0030659(cytoplasmic vesicle membrane); GO:0010181(FMN binding); GO:0042403(thyroid hormone metabolic process); GO:0006570(tyrosine metabolic process); GO:0140616(iodotyrosine deiodinase activity); GO:0005654(nucleoplasm)	thyroid hormone metabolic process; tyrosine metabolic process	oxidoreductase activity; FMN binding; iodotyrosine deiodinase activity	plasma membrane; cytoplasmic vesicle; cytoplasmic vesicle membrane; nucleoplasm
ENSMUSG00000030680	1.8677	0.0696998	2.02797	0.154427	0.999996	14.54	5.67	73.85	2.67	0.522672	0.281608	2.83437	0.133048	0.415148	1.54737	Pagr1a	PAXIP1 associated glutamate rich protein 1A [Source:MGI Symbol;Acc:MGI:1914528]	GO:0005634(nucleus); GO:0005515(protein binding); GO:0006281(DNA repair); GO:1902808(positive regulation of cell cycle G1/S phase transition); GO:0006974(DNA damage response); GO:0006310(DNA recombination); GO:0005654(nucleoplasm); GO:0035097(histone methyltransferase complex); GO:0060717(chorion development); GO:0044666(MLL3/4 complex); GO:0030331(nuclear estrogen receptor binding); GO:0033148(p…	DNA repair; positive regulation of cell cycle G1/S phase transition; DNA damage response; DNA recombination; chorion development; positive regulation of intracellular estrogen receptor signaling pathway; positive regulation of isotype switching to IgG isotypes; regulation of cell cycle G2/M phase transition	protein binding; nuclear estrogen receptor binding	nucleus; nucleoplasm; histone methyltransferase complex; MLL3/4 complex
ENSMUSG00000096606	1.86508	-0.366468	2.21499	0.136676	0.999996	13	2	50	4	0.467313	0.0993328	1.919	0.199323	0.305061	1.10862	Tpbgl	trophoblast glycoprotein-like [Source:MGI Symbol;Acc:MGI:3646425]	GO:0005515(protein binding); GO:0016020(membrane); GO:0005886(plasma membrane); GO:0090090(negative regulation of canonical Wnt signaling pathway)	negative regulation of canonical Wnt signaling pathway	protein binding	membrane; plasma membrane
ENSMUSG00000046607	-1.86213	0.929434	2.3388	0.126187	0.999996	145	8	27	10	5.21234	0.397331	1.03626	0.498308	2.89294	0.785751	Hrk	harakiri, BCL2 interacting protein (contains only BH3 domain) [Source:MGI Symbol;Acc:MGI:1201608]	GO:0042981(regulation of apoptotic process); GO:0016020(membrane); GO:0005739(mitochondrion); GO:0043525(positive regulation of neuron apoptotic process); GO:0006915(apoptotic process); GO:0043065(positive regulation of apoptotic process); GO:0051365(cellular response to potassium ion starvation); GO:0031334(positive regulation of protein-containing complex assembly); GO:0090200(positive regulati…	regulation of apoptotic process; positive regulation of neuron apoptotic process; apoptotic process; positive regulation of apoptotic process; cellular response to potassium ion starvation; positive regulation of protein-containing complex assembly; positive regulation of release of cytochrome c from mitochondria		membrane; mitochondrion
ENSMUSG00000038175	1.85644	1.85674	3.3589	0.0668425	0.999996	54	22	247	31	1.94115	1.09266	9.47988	1.54475	1.54118	5.58259	Mylip	myosin regulatory light chain interacting protein [Source:MGI Symbol;Acc:MGI:2388271]	GO:0005856(cytoskeleton); GO:0008092(cytoskeletal protein binding); GO:0005737(cytoplasm); GO:0046872(metal ion binding); GO:0005886(plasma membrane); GO:0016740(transferase activity); GO:0016567(protein ubiquitination); GO:0006511(ubiquitin-dependent protein catabolic process); GO:0004842(ubiquitin-protein transferase activity); GO:0061630(ubiquitin protein ligase activity); GO:0071404(cellular …	protein ubiquitination; ubiquitin-dependent protein catabolic process; cellular response to low-density lipoprotein particle stimulus; cholesterol homeostasis; positive regulation of protein catabolic process; nervous system development; negative regulation of neuron projection development; negative regulation of low-density lipoprotein particle clearance; protein destabilization; regulation of l…	cytoskeletal protein binding; metal ion binding; transferase activity; ubiquitin-protein transferase activity; ubiquitin protein ligase activity	cytoskeleton; cytoplasm; plasma membrane
ENSMUSG00000040907	1.84627	2.62096	1.27407	0.259004	0.999996	136	7	479	10	4.88882	0.347665	18.3841	0.498308	2.7057	9.53944	Atp1a3	ATPase, Na+/K+ transporting, alpha 3 polypeptide [Source:MGI Symbol;Acc:MGI:88107]	GO:0005524(ATP binding); GO:0016020(membrane); GO:0006813(potassium ion transport); GO:0000166(nucleotide binding); GO:0016887(ATP hydrolysis activity); GO:0005215(transporter activity); GO:0008556(P-type potassium transmembrane transporter activity); GO:0046872(metal ion binding); GO:0005886(plasma membrane); GO:0010248(establishment or maintenance of transmembrane electrochemical gradient); GO:…	potassium ion transport; establishment or maintenance of transmembrane electrochemical gradient; intracellular sodium ion homeostasis; intracellular potassium ion homeostasis; sodium ion export across plasma membrane; neuron projection maintenance; potassium ion import across plasma membrane; multicellular organism growth; neurogenesis; adult locomotory behavior; ERK1 and ERK2 cascade; phosphatid…	ATP binding; nucleotide binding; ATP hydrolysis activity; transporter activity; P-type potassium transmembrane transporter activity; metal ion binding; amyloid-beta binding; P-type sodium:potassium-exchanging transporter activity; protein-folding chaperone binding; heparan sulfate proteoglycan binding; D1 dopamine receptor binding; P-type sodium:potassium-exchanging transporter activity involved …	membrane; plasma membrane; endoplasmic reticulum; Golgi apparatus; axon; organelle membrane; neuronal cell body; sodium:potassium-exchanging ATPase complex; nucleus; synapse; cytoplasm; cell surface; myelin sheath; protein-containing complex; postsynapse; presynaptic membrane; sarcolemma; dendritic spine neck; calyx of Held; photoreceptor inner segment; neuron to neuron synapse; dendritic spine h…
ENSMUSG00000045991	-1.84574	-0.003678	3.41639	0.0645519	0.999996	60	13	16	3	2.15683	0.645663	0.614081	0.149492	1.44627	0.402493	Onecut2	one cut domain, family member 2 [Source:MGI Symbol;Acc:MGI:1891408]	GO:0003677(DNA binding); GO:0005634(nucleus); GO:0045944(positive regulation of transcription by RNA polymerase II); GO:0007179(transforming growth factor beta receptor signaling pathway); GO:0016477(cell migration); GO:0000978(RNA polymerase II cis-regulatory region sequence-specific DNA binding); GO:0001889(liver development); GO:0000981(DNA-binding transcription factor activity, RNA polymerase…	positive regulation of transcription by RNA polymerase II; transforming growth factor beta receptor signaling pathway; cell migration; liver development; regulation of transcription by RNA polymerase II; cilium assembly; negative regulation of transforming growth factor beta receptor signaling pathway; pancreas development; cell fate commitment; endocrine pancreas development; anatomical structur…	DNA binding; RNA polymerase II cis-regulatory region sequence-specific DNA binding; DNA-binding transcription factor activity, RNA polymerase II-specific; DNA-binding transcription factor activity; DNA-binding transcription activator activity, RNA polymerase II-specific; sequence-specific double-stranded DNA binding	nucleus; nucleoplasm; actin cytoskeleton
ENSMUSG00000121385	-1.8387	1.55951	1.49731	0.221086	0.999996	223.52	16.8	2.87	47.66	8.03491	0.834395	0.110151	2.37494	4.52642	1.17965		novel transcript
ENSMUSG00000120945	-1.83727	-1.34928	4.84555	0.0277176	0.999996	13	10	3	3	0.467313	0.496664	0.11514	0.149492	0.480482	0.130374	Gm56809	predicted gene, 56809 [Source:MGI Symbol;Acc:MGI:7337531]
ENSMUSG00000041205	-1.83673	0.205205	1.36971	0.241861	0.999996	86	3	22	1	3.09146	0.148999	0.844361	0.0498308	1.69922	0.480481	Map6d1	MAP6 domain containing 1 [Source:MGI Symbol;Acc:MGI:3607784]	GO:0005874(microtubule); GO:0005516(calmodulin binding); GO:0008017(microtubule binding); GO:0000226(microtubule cytoskeleton organization); GO:0005737(cytoplasm); GO:0005794(Golgi apparatus); GO:0005856(cytoskeleton); GO:0030705(cytoskeleton-dependent intracellular transport); GO:0005801(cis-Golgi network); GO:0005798(Golgi-associated vesicle); GO:0007026(negative regulation of microtubule depol…	microtubule cytoskeleton organization; cytoskeleton-dependent intracellular transport; negative regulation of microtubule depolymerization; regulation of microtubule cytoskeleton organization	calmodulin binding; microtubule binding	microtubule; cytoplasm; Golgi apparatus; cytoskeleton; cis-Golgi network; Golgi-associated vesicle
ENSMUSG00000020053	1.83124	3.90743	2.60344	0.106632	0.999996	294	50	1091	93	10.5685	2.48332	41.8727	4.63426	6.60028	23.3415	Igf1	insulin-like growth factor 1 [Source:MGI Symbol;Acc:MGI:96432]	GO:0005576(extracellular region); GO:0005179(hormone activity); GO:0008083(growth factor activity); GO:0005615(extracellular space); GO:0043066(negative regulation of apoptotic process); GO:0030324(lung development); GO:0045944(positive regulation of transcription by RNA polymerase II); GO:0005515(protein binding); GO:0010629(negative regulation of gene expression); GO:0035264(multicellular organ…	negative regulation of apoptotic process; lung development; positive regulation of transcription by RNA polymerase II; negative regulation of gene expression; multicellular organism growth; cellular response to glucose stimulus; positive regulation of cell growth; positive regulation of phosphatidylinositol 3-kinase/protein kinase B signal transduction; positive regulation of osteoblast different…	hormone activity; growth factor activity; protein binding; steroid binding; receptor ligand activity; insulin receptor binding; insulin-like growth factor receptor binding; transmembrane receptor protein tyrosine kinase activator activity; protein serine/threonine kinase activator activity; integrin binding	extracellular region; extracellular space; glutamatergic synapse; neuronal cell body; postsynapse; interstitial matrix; platelet alpha granule; neuronal dense core vesicle lumen; exocytic vesicle; alphav-beta3 integrin-IGF-1-IGF1R complex; insulin-like growth factor ternary complex
ENSMUSG00000107482	-1.83095	-1.24558	3.15162	0.0758517	0.999996	13.65	11.42	7.11	0	0.490679	0.56719	0.272882	0	0.525135	0.151556	Etfbl	electron transferring flavoprotein, beta polypeptide like [Source:MGI Symbol;Acc:MGI:5753809]	GO:0005739(mitochondrion); GO:0005759(mitochondrial matrix); GO:0009055(electron transfer activity)		electron transfer activity	mitochondrion; mitochondrial matrix
ENSMUSG00000035678	1.82529	0.0355942	2.62549	0.10516	0.999996	5	13	65	8	0.179736	0.645663	2.4947	0.398646	0.386989	1.49711	Tnfsf9	tumor necrosis factor (ligand) superfamily, member 9 [Source:MGI Symbol;Acc:MGI:1101058]	GO:0005515(protein binding); GO:0016020(membrane); GO:0006955(immune response); GO:0005164(tumor necrosis factor receptor binding); GO:0032813(tumor necrosis factor receptor superfamily binding); GO:0032729(positive regulation of type II interferon production); GO:0005886(plasma membrane); GO:0005125(cytokine activity); GO:0005615(extracellular space); GO:0007165(signal transduction); GO:0032755(…	immune response; positive regulation of type II interferon production; signal transduction; positive regulation of interleukin-6 production; myeloid dendritic cell differentiation; positive regulation of interleukin-12 production; positive regulation of activated T cell proliferation; regulation of immature T cell proliferation in thymus; positive regulation of cytotoxic T cell differentiation	protein binding; tumor necrosis factor receptor binding; tumor necrosis factor receptor superfamily binding; cytokine activity; signaling receptor binding	membrane; plasma membrane; extracellular space
ENSMUSG00000121387	-1.81634	6.32141	2.43684	0.118515	0.999996	6113.03	584.7	219.92	1248.45	219.746	29.0399	8.44054	62.2113	124.497	35.2407	Gm20482	predicted gene 20482 [Source:NCBI gene (formerly Entrezgene);Acc:102632136]
ENSMUSG00000051242	-1.81604	2.80338	4.72276	0.0297659	0.999996	482	82	83	58	17.3265	4.07264	3.18555	2.89019	10.7777	3.04217	Pcdhb9	protocadherin beta 9 [Source:MGI Symbol;Acc:MGI:2136744]	GO:0016020(membrane); GO:0005509(calcium ion binding); GO:0007156(homophilic cell adhesion via plasma membrane adhesion molecules); GO:0007155(cell adhesion); GO:0005886(plasma membrane)	homophilic cell adhesion via plasma membrane adhesion molecules; cell adhesion	calcium ion binding	membrane; plasma membrane
ENSMUSG00000078719	-1.80503	-0.522332	4.77411	0.0288907	0.999996	19	25	4	8	0.682996	1.24166	0.15352	0.398646	0.941004	0.263836	Msmp	microseminoprotein, prostate associated [Source:MGI Symbol;Acc:MGI:3652339]	GO:0005615(extracellular space); GO:0005576(extracellular region); GO:0005125(cytokine activity); GO:0007165(signal transduction); GO:0005737(cytoplasm); GO:0006954(inflammatory response); GO:0006935(chemotaxis); GO:0048247(lymphocyte chemotaxis); GO:0031727(CCR2 chemokine receptor binding); GO:0002548(monocyte chemotaxis)	signal transduction; inflammatory response; chemotaxis; lymphocyte chemotaxis; monocyte chemotaxis	cytokine activity; CCR2 chemokine receptor binding	extracellular space; extracellular region; cytoplasm
ENSMUSG00000071847	-1.80014	1.40171	2.20672	0.13741	0.999996	203	11	39	15	7.29728	0.54633	1.49682	0.747462	4.01684	1.14332	Apcdd1	adenomatosis polyposis coli down-regulated 1 [Source:MGI Symbol;Acc:MGI:3513977]	GO:0005886(plasma membrane); GO:0030178(negative regulation of Wnt signaling pathway); GO:0017147(Wnt-protein binding); GO:0016055(Wnt signaling pathway); GO:0043615(astrocyte cell migration); GO:0042802(identical protein binding); GO:0001942(hair follicle development); GO:0042487(regulation of odontogenesis of dentin-containing tooth)	negative regulation of Wnt signaling pathway; Wnt signaling pathway; astrocyte cell migration; hair follicle development; regulation of odontogenesis of dentin-containing tooth	Wnt-protein binding; identical protein binding	plasma membrane
ENSMUSG00000054555	-1.79805	2.29488	4.78327	0.0287375	0.999996	151	193	27	66	5.42802	9.58561	1.03626	3.28883	7.47258	2.11958	Adam12	ADAM metallopeptidase domain 12 [Source:MGI Symbol;Acc:MGI:105378]	GO:0006508(proteolysis); GO:0008237(metallopeptidase activity); GO:0004222(metalloendopeptidase activity); GO:0016020(membrane); GO:0046872(metal ion binding); GO:0007155(cell adhesion); GO:0005515(protein binding); GO:0017124(SH3 domain binding); GO:0005886(plasma membrane); GO:0005654(nucleoplasm)	proteolysis; cell adhesion	metallopeptidase activity; metalloendopeptidase activity; metal ion binding; protein binding; SH3 domain binding	membrane; plasma membrane; nucleoplasm
ENSMUSG00000039095	-1.79199	1.29153	3.72734	0.0535285	0.999996	158	32	16	30	5.67965	1.58932	0.614081	1.49492	3.69612	1.0281	En2	engrailed 2 [Source:MGI Symbol;Acc:MGI:95390]	GO:0003677(DNA binding); GO:0006355(regulation of DNA-templated transcription); GO:0005634(nucleus); GO:0007275(multicellular organism development); GO:0000981(DNA-binding transcription factor activity, RNA polymerase II-specific); GO:0045944(positive regulation of transcription by RNA polymerase II); GO:0030182(neuron differentiation); GO:0006357(regulation of transcription by RNA polymerase II)…	regulation of DNA-templated transcription; multicellular organism development; positive regulation of transcription by RNA polymerase II; neuron differentiation; regulation of transcription by RNA polymerase II; dopaminergic neuron differentiation; midbrain development; neuron development; embryonic brain development; hindbrain development; negative regulation of neuron apoptotic process	DNA binding; DNA-binding transcription factor activity, RNA polymerase II-specific; RNA polymerase II cis-regulatory region sequence-specific DNA binding; sequence-specific double-stranded DNA binding	nucleus; fibrillar center; nucleoplasm; nucleolus
ENSMUSG00000026365	1.79174	4.15977	4.64094	0.0312179	0.999996	222	160	1223.88	164	7.98027	7.94662	46.9726	8.17225	7.96371	27.6503	Cfh	complement component factor h [Source:MGI Symbol;Acc:MGI:88385]	GO:0010467(gene expression); GO:0005515(protein binding); GO:0007005(mitochondrion organization); GO:0005739(mitochondrion); GO:0006954(inflammatory response); GO:0060041(retina development in camera-type eye); GO:0030424(axon); GO:0001525(angiogenesis); GO:0046548(retinal rod cell development); GO:0008340(determination of adult lifespan); GO:0005615(extracellular space); GO:0009897(external side…	gene expression; mitochondrion organization; inflammatory response; retina development in camera-type eye; angiogenesis; retinal rod cell development; determination of adult lifespan; complement activation; complement activation, alternative pathway; kidney development; neuromuscular process; platelet aggregation; response to dietary excess; ATP metabolic process; response to cytokine; visual per…	protein binding; complement component C3b binding; heparin binding	mitochondrion; axon; extracellular space; external side of plasma membrane; extracellular region; neuronal cell body
ENSMUSG00000044734	-1.78921	1.69222	1.90139	0.167923	0.999996	255	10	21	40	9.16653	0.496664	0.805981	1.99323	4.9343	1.36942	Serpinb1a	serine (or cysteine) peptidase inhibitor, clade B, member 1a [Source:MGI Symbol;Acc:MGI:1913472]	GO:0004867(serine-type endopeptidase inhibitor activity); GO:0005615(extracellular space); GO:0005737(cytoplasm); GO:0005768(endosome); GO:0005576(extracellular region); GO:0005764(lysosome); GO:0005515(protein binding); GO:0006954(inflammatory response); GO:0005769(early endosome); GO:0045088(regulation of innate immune response); GO:0062023(collagen-containing extracellular matrix); GO:0019725(…	inflammatory response; regulation of innate immune response; cellular homeostasis; regulation of protein catabolic process; type B pancreatic cell proliferation; negative regulation of interleukin-1 beta production	serine-type endopeptidase inhibitor activity; protein binding	extracellular space; cytoplasm; endosome; extracellular region; lysosome; early endosome; collagen-containing extracellular matrix; cytolytic granule
ENSMUSG00000013523	-1.78828	5.0076	0.607339	0.435791	0.999996	2756	6	748	1	99.0704	0.297998	28.7083	0.0498308	49.8179	14.4858	Bcas1	brain enriched myelin associated protein 1 [Source:MGI Symbol;Acc:MGI:1924210]	GO:0045202(synapse); GO:0005829(cytosol); GO:0005737(cytoplasm); GO:0042803(protein homodimerization activity); GO:0042552(myelination)	myelination	protein homodimerization activity	synapse; cytosol; cytoplasm
ENSMUSG00000049538	-1.78777	1.51328	2.21727	0.136475	0.999996	221	11	29	27	7.94433	0.54633	1.11302	1.34543	4.34294	1.22291	Adamts16	ADAM metallopeptidase with thrombospondin type 1 motif 16 [Source:MGI Symbol;Acc:MGI:2429637]	GO:0006508(proteolysis); GO:0008237(metallopeptidase activity); GO:0004222(metalloendopeptidase activity); GO:0030198(extracellular matrix organization); GO:0046872(metal ion binding); GO:0005576(extracellular region); GO:0031012(extracellular matrix); GO:0001658(branching involved in ureteric bud morphogenesis); GO:0003073(regulation of systemic arterial blood pressure); GO:1902017(regulation of…	proteolysis; extracellular matrix organization; branching involved in ureteric bud morphogenesis; regulation of systemic arterial blood pressure; regulation of cilium assembly; male gamete generation	metallopeptidase activity; metalloendopeptidase activity; metal ion binding	extracellular region; extracellular matrix
ENSMUSG00000022438	1.7846	2.52373	2.75559	0.0969149	0.999996	68	53	413	33	2.44441	2.63232	15.851	1.64442	2.53456	8.83143	Parvb	parvin, beta [Source:MGI Symbol;Acc:MGI:2153063]	GO:0005515(protein binding); GO:0007155(cell adhesion); GO:0003779(actin binding); GO:0030036(actin cytoskeleton organization); GO:0042995(cell projection); GO:0005737(cytoplasm); GO:0005886(plasma membrane); GO:0007163(establishment or maintenance of cell polarity); GO:0070161(anchoring junction); GO:0005856(cytoskeleton); GO:0030027(lamellipodium); GO:0005925(focal adhesion); GO:0030017(sarcome…	cell adhesion; actin cytoskeleton organization; establishment or maintenance of cell polarity; substrate adhesion-dependent cell spreading; lamellipodium assembly; cell projection assembly; establishment or maintenance of cell polarity regulating cell shape	protein binding; actin binding	cell projection; cytoplasm; plasma membrane; anchoring junction; cytoskeleton; lamellipodium; focal adhesion; sarcomere; Z disc; actin cytoskeleton; cytosol
ENSMUSG00000091387	-1.78309	0.167636	3.53949	0.059924	0.999996	31	43	4	16	1.11436	2.13565	0.15352	0.797293	1.59644	0.447689	Gcnt4	glucosaminyl (N-acetyl) transferase 4, core 2 (beta-1,6-N-acetylglucosaminyltransferase) [Source:MGI Symbol;Acc:MGI:2684919]	GO:0016020(membrane); GO:0016757(glycosyltransferase activity); GO:0000139(Golgi membrane); GO:0005794(Golgi apparatus); GO:0006486(protein glycosylation); GO:0001780(neutrophil homeostasis); GO:0042403(thyroid hormone metabolic process); GO:0008375(acetylglucosaminyltransferase activity); GO:0002121(inter-male aggressive behavior); GO:0048729(tissue morphogenesis); GO:0060993(kidney morphogenesi…	protein glycosylation; neutrophil homeostasis; thyroid hormone metabolic process; inter-male aggressive behavior; tissue morphogenesis; kidney morphogenesis	glycosyltransferase activity; acetylglucosaminyltransferase activity; beta-1,3-galactosyl-O-glycosyl-glycoprotein beta-1,6-N-acetylglucosaminyltransferase activity	membrane; Golgi membrane; Golgi apparatus
ENSMUSG00000046223	1.78166	0.0989837	2.34501	0.125684	0.999996	4	15	67	9	0.143789	0.744996	2.57146	0.448477	0.411868	1.55975	Plaur	plasminogen activator, urokinase receptor [Source:MGI Symbol;Acc:MGI:97612]	GO:0043066(negative regulation of apoptotic process); GO:0016020(membrane); GO:0005886(plasma membrane); GO:0098552(side of membrane); GO:0005576(extracellular region); GO:0005515(protein binding); GO:0098637(protein complex involved in cell-matrix adhesion); GO:0010755(regulation of plasminogen activation); GO:0030155(regulation of cell adhesion); GO:0038195(urokinase plasminogen activator signa…	negative regulation of apoptotic process; regulation of plasminogen activation; regulation of cell adhesion; urokinase plasminogen activator signaling pathway; regulation of fibrinolysis; mesenchymal cell differentiation; epithelial cell differentiation involved in prostate gland development; positive regulation of homotypic cell-cell adhesion; positive regulation of epidermal growth factor recep…	protein binding; signaling receptor binding; enzyme binding; protein domain specific binding	membrane; plasma membrane; side of membrane; extracellular region; protein complex involved in cell-matrix adhesion; external side of plasma membrane; serine-type endopeptidase complex; cell surface
ENSMUSG00000032344	1.7702	-0.0554619	3.38228	0.0659009	0.999996	12	7	58	9	0.431366	0.347665	2.22604	0.448477	0.394108	1.38221	Cgas	cyclic GMP-AMP synthase [Source:MGI Symbol;Acc:MGI:2442261]	GO:0008340(determination of adult lifespan); GO:0005634(nucleus); GO:0005737(cytoplasm); GO:0046872(metal ion binding); GO:0005886(plasma membrane); GO:0003677(DNA binding); GO:0005524(ATP binding); GO:0005829(cytosol); GO:0006281(DNA repair); GO:0005694(chromosome); GO:0051607(defense response to virus); GO:0008289(lipid binding); GO:0005525(GTP binding); GO:0003682(chromatin binding); GO:000551…	determination of adult lifespan; DNA repair; defense response to virus; innate immune response; regulation of immune response; DNA damage response; positive regulation of type I interferon production; negative regulation of double-strand break repair via homologous recombination; activation of innate immune response; regulation of T cell activation; cAMP-mediated signaling; regulation of immunogl…	metal ion binding; DNA binding; ATP binding; lipid binding; GTP binding; chromatin binding; protein binding; nucleotidyltransferase activity; double-stranded DNA binding; protein homodimerization activity; nucleosome binding; phosphatidylinositol-4,5-bisphosphate binding; molecular condensate scaffold activity; poly-ADP-D-ribose modification-dependent protein binding; 2',3'-cyclic GMP-AMP synthas…	nucleus; cytoplasm; plasma membrane; cytosol; chromosome; site of double-strand break; nucleoplasm; nuclear body
ENSMUSG00000040212	1.76964	2.79991	3.14728	0.0760539	0.999996	45	93	466	67	1.61762	4.61897	17.8851	3.33866	3.0658	10.6839	Emp3	epithelial membrane protein 3 [Source:MGI Symbol;Acc:MGI:1098729]	GO:0016020(membrane); GO:0005886(plasma membrane); GO:0006915(apoptotic process); GO:0032060(bleb assembly)	apoptotic process; bleb assembly		membrane; plasma membrane
ENSMUSG00000085512	-1.76688	-0.348982	4.94103	0.0262265	0.999996	21	29	11	4	0.754891	1.44032	0.422181	0.199323	1.07324	0.321354	Gm11958	predicted gene 11958 [Source:MGI Symbol;Acc:MGI:3652302]
ENSMUSG00000092574	-1.76238	4.78647	1.95954	0.161562	0.999996	2079.16	204.8	52.49	462.05	74.7399	10.1717	2.01457	23.0243	42.5578	12.4291	2810047C21Rik1	RIKEN cDNA 2810047C21 gene 1 [Source:MGI Symbol;Acc:MGI:1919966]
ENSMUSG00000074813	1.76218	-0.41768	3.34544	0.0673915	0.999996	12	3	41	9	0.431366	0.148999	1.57358	0.448477	0.306838	1.04447	Morrbid	myeloid RNA regulator of BCL2L11 induced cell death [Source:MGI Symbol;Acc:MGI:3652191]
ENSMUSG00000064373	1.76085	7.79211	4.38453	0.0362664	0.999996	2312	2392	15460	1824	83.1099	118.802	593.356	90.8914	100.932	342.207	Selenop	selenoprotein P [Source:MGI Symbol;Acc:MGI:894288]	GO:0008430(selenium binding); GO:0005576(extracellular region); GO:0009791(post-embryonic development); GO:0007626(locomotory behavior); GO:0005615(extracellular space); GO:0005515(protein binding); GO:0040008(regulation of growth); GO:0007420(brain development); GO:0019953(sexual reproduction); GO:0001887(selenium compound metabolic process); GO:0010269(response to selenium ion)	post-embryonic development; locomotory behavior; regulation of growth; brain development; sexual reproduction; selenium compound metabolic process; response to selenium ion	selenium binding; protein binding	extracellular region; extracellular space
ENSMUSG00000121828	1.75767	-0.532449	1.29252	0.255583	0.999996	14.54	0	42.28	4	0.522672	0	1.62271	0.199323	0.292548	0.955367		novel transcript
ENSMUSG00000049097	-1.75611	-0.712378	5.83655	0.0156966	0.999996	23	16	7	4	0.826785	0.794662	0.26866	0.199323	0.812045	0.237537	Ankrd34a	ankyrin repeat domain 34A [Source:MGI Symbol;Acc:MGI:3617846]	GO:0005515(protein binding)		protein binding
ENSMUSG00000134906	-1.75095	-0.301962	5.10125	0.0239087	0.999996	42	14	8	7	1.50978	0.695329	0.307041	0.348816	1.13067	0.325948		novel transcript, antisense to Mical1
ENSMUSG00000021613	-1.75012	0.784192	5.19853	0.022606	0.999996	99	29	18	16	3.55877	1.44032	0.690841	0.797293	2.54231	0.74031	Hapln1	hyaluronan and proteoglycan link protein 1 [Source:MGI Symbol;Acc:MGI:1337006]	GO:0005540(hyaluronic acid binding); GO:0007155(cell adhesion); GO:0005615(extracellular space); GO:0005576(extracellular region); GO:0045202(synapse); GO:0031012(extracellular matrix); GO:0062023(collagen-containing extracellular matrix); GO:0007417(central nervous system development); GO:0002052(positive regulation of neuroblast proliferation); GO:0010001(glial cell differentiation); GO:0001501…	cell adhesion; central nervous system development; positive regulation of neuroblast proliferation; glial cell differentiation; skeletal system development	hyaluronic acid binding; extracellular matrix structural constituent conferring compression resistance	extracellular space; extracellular region; synapse; extracellular matrix; collagen-containing extracellular matrix; perineuronal net
ENSMUSG00000036634	-1.74565	1.75796	1.1676	0.279895	0.999996	275	3	66	9	9.88548	0.148999	2.53308	0.448477	5.12883	1.54006	Mag	myelin-associated glycoprotein [Source:MGI Symbol;Acc:MGI:96912]	GO:0005515(protein binding); GO:0042552(myelination); GO:0010977(negative regulation of neuron projection development); GO:0005886(plasma membrane); GO:0007155(cell adhesion); GO:0045121(membrane raft); GO:0008289(lipid binding); GO:0030246(carbohydrate binding); GO:0033691(sialic acid binding); GO:0043209(myelin sheath); GO:0019901(protein kinase binding); GO:0033270(paranode region of axon); GO…	myelination; negative regulation of neuron projection development; cell adhesion; negative regulation of neuron differentiation; axon regeneration; negative regulation of axon extension; negative regulation of neuron apoptotic process; transmission of nerve impulse; central nervous system myelin formation; central nervous system myelination; positive regulation of astrocyte differentiation; posit…	protein binding; lipid binding; carbohydrate binding; sialic acid binding; protein kinase binding; protein homodimerization activity; signaling receptor binding; ganglioside GT1b binding	plasma membrane; membrane raft; myelin sheath; paranode region of axon; Schmidt-Lanterman incisure; mesaxon; myelin sheath adaxonal region; compact myelin; membrane
ENSMUSG00000027221	1.74101	0.389659	3.02267	0.082108	0.999996	25	4	74	18	0.89868	0.198666	2.84012	0.896954	0.58206	1.90841	Chst1	carbohydrate sulfotransferase 1 [Source:MGI Symbol;Acc:MGI:1924219]	GO:0005975(carbohydrate metabolic process); GO:0008146(sulfotransferase activity); GO:0000139(Golgi membrane); GO:0016020(membrane); GO:0005794(Golgi apparatus); GO:0016740(transferase activity); GO:0006954(inflammatory response); GO:0005802(trans-Golgi network); GO:0001517(N-acetylglucosamine 6-O-sulfotransferase activity); GO:0006044(N-acetylglucosamine metabolic process); GO:0045130(keratan su…	carbohydrate metabolic process; inflammatory response; N-acetylglucosamine metabolic process; galactose metabolic process; sulfur compound metabolic process; keratan sulfate biosynthetic process; keratan sulfate metabolic process	sulfotransferase activity; transferase activity; N-acetylglucosamine 6-O-sulfotransferase activity; keratan sulfotransferase activity	Golgi membrane; membrane; Golgi apparatus; trans-Golgi network
ENSMUSG00000037148	1.74024	0.947955	3.40649	0.0649406	0.999996	26	15	122	19	0.934627	0.744996	4.68237	0.946785	0.847447	2.87155	Arhgap10	Rho GTPase activating protein 10 [Source:MGI Symbol;Acc:MGI:1925764]	GO:0005515(protein binding); GO:0007165(signal transduction); GO:0005096(GTPase activator activity); GO:0005737(cytoplasm); GO:0005886(plasma membrane); GO:0005829(cytosol); GO:0005768(endosome); GO:0048471(perinuclear region of cytoplasm); GO:0010008(endosome membrane); GO:0007010(cytoskeleton organization); GO:0043066(negative regulation of apoptotic process)	signal transduction; cytoskeleton organization; negative regulation of apoptotic process	protein binding; GTPase activator activity	cytoplasm; plasma membrane; cytosol; endosome; perinuclear region of cytoplasm; endosome membrane
ENSMUSG00000090124	1.73894	2.05901	4.36273	0.0367334	0.999996	64.42	28.68	249.05	59.49	2.31572	1.42443	9.55856	2.96443	1.89232	6.31396	Ugt1a7c	UDP glucuronosyltransferase 1 family, polypeptide A7C [Source:MGI Symbol;Acc:MGI:3032636]	GO:0008194(UDP-glycosyltransferase activity); GO:0016020(membrane); GO:0016757(glycosyltransferase activity); GO:0005783(endoplasmic reticulum); GO:0005789(endoplasmic reticulum membrane); GO:0015020(glucuronosyltransferase activity); GO:0006629(lipid metabolic process); GO:0019899(enzyme binding); GO:0052695(cellular glucuronidation); GO:0001889(liver development); GO:0046226(coumarin catabolic …	lipid metabolic process; cellular glucuronidation; liver development; coumarin catabolic process; estrogen metabolic process; estrogen catabolic process; 4-chlorobiphenyl metabolic process; cellular response to glucocorticoid stimulus; L-ascorbic acid biosynthetic process; glucuronate metabolic process	UDP-glycosyltransferase activity; glycosyltransferase activity; glucuronosyltransferase activity; enzyme binding; transferase activity; hexosyltransferase activity; protein-containing complex binding; alpha-glucuronidase activity	membrane; endoplasmic reticulum; endoplasmic reticulum membrane; protein-containing complex; mitochondrial inner membrane
ENSMUSG00000024696	1.73813	2.23094	2.69993	0.100353	0.999996	76	30	325	33	2.73199	1.48999	12.4735	1.64442	2.13943	7.13629	Lpxn	leupaxin [Source:MGI Symbol;Acc:MGI:2147677]	GO:0046872(metal ion binding); GO:0005925(focal adhesion); GO:0005634(nucleus); GO:0042995(cell projection); GO:0005737(cytoplasm); GO:0005886(plasma membrane); GO:0007155(cell adhesion); GO:0070161(anchoring junction); GO:0005515(protein binding); GO:0048471(perinuclear region of cytoplasm); GO:0002102(podosome); GO:0007179(transforming growth factor beta receptor signaling pathway); GO:0003712(…	cell adhesion; transforming growth factor beta receptor signaling pathway; endothelial cell migration; regulation of cell adhesion mediated by integrin; substrate adhesion-dependent cell spreading; negative regulation of B cell receptor signaling pathway; negative regulation of cell adhesion	metal ion binding; protein binding; transcription coregulator activity	focal adhesion; nucleus; cell projection; cytoplasm; plasma membrane; anchoring junction; perinuclear region of cytoplasm; podosome; cytosol; nuclear speck
ENSMUSG00000028358	1.73224	0.648615	2.66713	0.102441	0.999996	29	6	98	15	1.04247	0.297998	3.76125	0.747462	0.702987	2.30844	Zfp618	zinc finger protein 618 [Source:MGI Symbol;Acc:MGI:1919950]	GO:0005634(nucleus); GO:0046872(metal ion binding); GO:0003677(DNA binding); GO:0005694(chromosome); GO:0001221(transcription coregulator binding); GO:0042802(identical protein binding); GO:0000785(chromatin); GO:0005721(pericentric heterochromatin)		metal ion binding; DNA binding; transcription coregulator binding; identical protein binding	nucleus; chromosome; chromatin; pericentric heterochromatin
ENSMUSG00000050106	1.73192	-0.343948	4.34144	0.0371955	0.999996	12	4	39	13	0.431366	0.198666	1.49682	0.6478	0.32849	1.09687	Tmc8	transmembrane channel-like gene family 8 [Source:MGI Symbol;Acc:MGI:2669037]	GO:0005886(plasma membrane); GO:0016020(membrane); GO:0005783(endoplasmic reticulum); GO:0005789(endoplasmic reticulum membrane); GO:0034220(monoatomic ion transmembrane transport); GO:0005515(protein binding); GO:0043065(positive regulation of apoptotic process); GO:0050821(protein stabilization); GO:0006882(intracellular zinc ion homeostasis); GO:0008381(mechanosensitive monoatomic ion channel …	monoatomic ion transmembrane transport; positive regulation of apoptotic process; protein stabilization; intracellular zinc ion homeostasis; negative regulation of protein-containing complex assembly; regulation of extrinsic apoptotic signaling pathway via death domain receptors	protein binding; mechanosensitive monoatomic ion channel activity; tumor necrosis factor binding; protein sequestering activity	plasma membrane; membrane; endoplasmic reticulum; endoplasmic reticulum membrane; cytoplasm; Golgi apparatus; nuclear membrane
ENSMUSG00000035811	-1.73075	3.04033	2.76181	0.0965389	0.999996	627	48	106	69	22.5389	2.38399	4.06829	3.43832	12.5645	3.76107	Ugt2b35	UDP glucuronosyltransferase 2 family, polypeptide B35 [Source:MGI Symbol;Acc:MGI:3576100]	GO:0008194(UDP-glycosyltransferase activity); GO:0016020(membrane); GO:0016757(glycosyltransferase activity); GO:0015020(glucuronosyltransferase activity); GO:0052695(cellular glucuronidation); GO:0008210(estrogen metabolic process)	cellular glucuronidation; estrogen metabolic process	UDP-glycosyltransferase activity; glycosyltransferase activity; glucuronosyltransferase activity	membrane
ENSMUSG00000040699	1.72702	3.41995	3.41438	0.0646309	0.999996	134	101	743	81	4.81692	5.0163	28.5164	4.03629	4.91424	16.3576	Limd2	LIM domain containing 2 [Source:MGI Symbol;Acc:MGI:1915053]	GO:0005634(nucleus); GO:0005737(cytoplasm); GO:0046872(metal ion binding); GO:0005886(plasma membrane); GO:0051015(actin filament binding); GO:0015629(actin cytoskeleton); GO:0051017(actin filament bundle assembly); GO:0005654(nucleoplasm); GO:0005829(cytosol)	actin filament bundle assembly	metal ion binding; actin filament binding	nucleus; cytoplasm; plasma membrane; actin cytoskeleton; nucleoplasm; cytosol
ENSMUSG00000027219	1.72487	-0.598624	1.06077	0.303039	0.999996	14	0	42	2	0.503261	0	1.61196	0.0996616	0.281963	0.904281	Slc28a2	solute carrier family 28 (sodium-coupled nucleoside transporter), member 2 [Source:MGI Symbol;Acc:MGI:1913105]	GO:0016020(membrane); GO:0005337(nucleoside transmembrane transporter activity); GO:1901642(nucleoside transmembrane transport); GO:0005886(plasma membrane); GO:0016327(apicolateral plasma membrane); GO:0012506(vesicle membrane); GO:0005415(nucleoside:sodium symporter activity); GO:0015211(purine nucleoside transmembrane transporter activity); GO:0001895(retina homeostasis); GO:0034394(protein lo…	nucleoside transmembrane transport; retina homeostasis; protein localization to cell surface; purine nucleoside transmembrane transport	nucleoside transmembrane transporter activity; nucleoside:sodium symporter activity; purine nucleoside transmembrane transporter activity	membrane; plasma membrane; apicolateral plasma membrane; vesicle membrane; coated vesicle; brush border membrane
ENSMUSG00000022587	1.72282	4.02768	12.0379	0.000521284	0.679139	196	162	853	342	7.04565	8.04595	32.7382	17.0421	7.53763	24.925	Ly6e	lymphocyte antigen 6 family member E [Source:MGI Symbol;Acc:MGI:106651]	GO:0046597(negative regulation of viral entry into host cell)	negative regulation of viral entry into host cell
ENSMUSG00000053024	-1.72153	0.558794	3.04796	0.0808386	0.999996	96	15	10	18	3.45093	0.744996	0.383801	0.896954	2.15951	0.620829	Cntn2	contactin 2 [Source:MGI Symbol;Acc:MGI:104518]	GO:0005515(protein binding); GO:0045202(synapse); GO:0005886(plasma membrane); GO:0098552(side of membrane); GO:0098632(cell-cell adhesion mediator activity); GO:0030424(axon); GO:0007155(cell adhesion); GO:0098609(cell-cell adhesion); GO:0007160(cell-matrix adhesion); GO:0007420(brain development); GO:0043194(axon initial segment); GO:0007411(axon guidance); GO:0002021(response to dietary excess…	cell adhesion; cell-cell adhesion; cell-matrix adhesion; brain development; axon guidance; response to dietary excess; fat cell differentiation; axonogenesis; reduction of food intake in response to dietary excess; clustering of voltage-gated potassium channels; protein localization to juxtaparanode region of axon; establishment of protein localization to juxtaparanode region of axon; presynaptic…	protein binding; cell-cell adhesion mediator activity	synapse; plasma membrane; side of membrane; axon; axon initial segment; node of Ranvier; juxtaparanode region of axon; myelin sheath; postsynaptic membrane
ENSMUSG00000121171	-1.71838	-0.740261	5.20687	0.0224979	0.999996	21.52	16.14	4.24	6.4	0.773583	0.801615	0.162731	0.318917	0.786429	0.232804	Gm54112	predicted gene, 54112 [Source:MGI Symbol;Acc:MGI:6723249]
ENSMUSG00000028364	-1.71806	4.01149	3.1536	0.0757597	0.999996	178	864	110	216	6.3986	42.9117	4.22181	10.7635	24.5566	7.44767	Tnc	tenascin C [Source:MGI Symbol;Acc:MGI:101922]	GO:0005515(protein binding); GO:0010628(positive regulation of gene expression); GO:0008284(positive regulation of cell population proliferation); GO:0005615(extracellular space); GO:0007155(cell adhesion); GO:0005576(extracellular region); GO:0062023(collagen-containing extracellular matrix); GO:0005614(interstitial matrix); GO:0030155(regulation of cell adhesion); GO:0031175(neuron projection d…	positive regulation of gene expression; positive regulation of cell population proliferation; cell adhesion; regulation of cell adhesion; neuron projection development; neuromuscular junction development; prostate gland epithelium morphogenesis; bud outgrowth involved in lung branching; peripheral nervous system axon regeneration; negative regulation of cell adhesion; mesenchymal-epithelial cell …	protein binding; extracellular matrix structural constituent; integrin binding; syndecan binding; fibronectin binding	extracellular space; extracellular region; collagen-containing extracellular matrix; interstitial matrix; basement membrane; perisynaptic extracellular matrix; tenascin complex; extracellular matrix of synaptic cleft; glutamatergic synapse
ENSMUSG00000034330	1.71781	3.65045	3.48108	0.0620743	0.999996	219	75	851	111	7.87243	3.72498	32.6614	5.53122	5.84119	19.1738	Plcg2	phospholipase C, gamma 2 [Source:MGI Symbol;Acc:MGI:97616]	GO:0005515(protein binding); GO:0007165(signal transduction); GO:0035556(intracellular signal transduction); GO:0006629(lipid metabolic process); GO:0004435(phosphatidylinositol phospholipase C activity); GO:0009395(phospholipid catabolic process); GO:0008081(phosphoric diester hydrolase activity); GO:0010628(positive regulation of gene expression); GO:0010468(regulation of gene expression); GO:0…	signal transduction; intracellular signal transduction; lipid metabolic process; phospholipid catabolic process; positive regulation of gene expression; regulation of gene expression; response to lipopolysaccharide; positive regulation of cytosolic calcium ion concentration; negative regulation of programmed cell death; lipid catabolic process; release of sequestered calcium ion into cytosol; pho…	protein binding; phosphatidylinositol phospholipase C activity; phosphoric diester hydrolase activity; hydrolase activity; phospholipase C activity; phosphorylation-dependent protein binding; phosphotyrosine residue binding; protein kinase binding; phosphatidylcholine phospholipase C activity; scaffold protein binding; protein tyrosine kinase binding	membrane; plasma membrane; cytosol; membrane raft; ruffle membrane; cytoplasm; perinuclear region of cytoplasm; intracellular vesicle
ENSMUSG00000022543	-1.71577	-0.682024	2.00024	0.157275	0.999996	17.65	20.71	12.59	0	0.634468	1.02859	0.483205	0	0.815355	0.265705	Dnaaf8	dynein axonemal assembly factor 8 [Source:MGI Symbol;Acc:MGI:1921934]
ENSMUSG00000034438	1.7105	0.30132	4.80967	0.0283005	0.999996	17.01	9	65	20	0.611462	0.446997	2.4947	0.996616	0.537326	1.7779	Gbp8	guanylate-binding protein 8 [Source:MGI Symbol;Acc:MGI:1923324]	GO:0003924(GTPase activity); GO:0005525(GTP binding); GO:0071346(cellular response to type II interferon); GO:0045087(innate immune response); GO:0031410(cytoplasmic vesicle); GO:0042832(defense response to protozoan); GO:0050830(defense response to Gram-positive bacterium)	cellular response to type II interferon; innate immune response; defense response to protozoan; defense response to Gram-positive bacterium	GTPase activity; GTP binding	cytoplasmic vesicle
ENSMUSG00000049612	-1.70825	1.8682	1.26272	0.261136	0.999996	288	9	78	6	10.3528	0.446997	2.99365	0.298985	5.50668	1.70593	Omg	oligodendrocyte myelin glycoprotein [Source:MGI Symbol;Acc:MGI:106586]	GO:0005515(protein binding)		protein binding
ENSMUSG00000026147	-1.70598	2.3522	1.84665	0.174174	0.999996	401	17	84	29	14.4148	0.844328	3.22393	1.44509	7.73789	2.36587	Col9a1	collagen, type IX, alpha 1 [Source:MGI Symbol;Acc:MGI:88465]	GO:0005581(collagen trimer); GO:0030246(carbohydrate binding); GO:0042803(protein homodimerization activity); GO:0005594(collagen type IX trimer)		carbohydrate binding; protein homodimerization activity	collagen trimer; collagen type IX trimer
ENSMUSG00000121769	1.70141	-0.221266	1.57095	0.210069	0.999996	19.77	0	19.96	32.54	0.710676	0	0.766066	1.62149	0.394323	1.16991		novel transcript
ENSMUSG00000121464	-1.69788	-0.154373	5.30416	0.0212746	0.999996	43.97	17.74	11.71	6.02	1.5806	0.881082	0.449431	0.299981	1.25358	0.381478		novel transcript
ENSMUSG00000138558	-1.69593	-0.767946	5.0373	0.0248072	0.999996	22	15	8	3	0.790838	0.744996	0.307041	0.149492	0.769851	0.236331		novel transcript
ENSMUSG00000116763	-1.69417	0.800268	4.03036	0.0446883	0.999996	48.65	67.37	10	24	1.74883	3.34602	0.383801	1.19594	2.51493	0.761581	Gm41492	predicted gene, 41492 [Source:MGI Symbol;Acc:MGI:5624377]
ENSMUSG00000051457	1.68993	1.05966	3.89664	0.0483828	0.999996	30	16	123	27	1.07842	0.794662	4.72075	1.34543	0.947331	3.08184	Spn	sialophorin [Source:MGI Symbol;Acc:MGI:98384]	GO:0005515(protein binding); GO:0005634(nucleus); GO:0042995(cell projection); GO:0016020(membrane); GO:0007166(cell surface receptor signaling pathway); GO:0005615(extracellular space); GO:0009897(external side of plasma membrane); GO:0004888(transmembrane signaling receptor activity); GO:0005886(plasma membrane); GO:0016605(PML body); GO:0050776(regulation of immune response); GO:0001934(positi…	cell surface receptor signaling pathway; regulation of immune response; positive regulation of protein phosphorylation; defense response to bacterium; response to protozoan; regulation of T cell migration; regulation of T cell activation; positive regulation of tumor necrosis factor production; regulation of defense response to virus; T cell proliferation; negative regulation of type IV hypersens…	protein binding; transmembrane signaling receptor activity; protein domain specific binding; heat shock protein binding; Hsp70 protein binding	nucleus; cell projection; membrane; extracellular space; external side of plasma membrane; plasma membrane; PML body; cell surface; microvillus; basement membrane; uropod; cleavage furrow
ENSMUSG00000071862	-1.6878	2.19009	0.995811	0.318326	0.999996	367	7	104	4	13.1926	0.347665	3.99153	0.199323	6.88398	2.16664	Lrrtm2	leucine rich repeat transmembrane neuronal 2 [Source:MGI Symbol;Acc:MGI:2389174]	GO:0005515(protein binding); GO:0060291(long-term synaptic potentiation); GO:0005615(extracellular space); GO:0005886(plasma membrane); GO:0045202(synapse); GO:0045211(postsynaptic membrane); GO:0016020(membrane); GO:0050808(synapse organization); GO:0098978(glutamatergic synapse); GO:0099151(regulation of postsynaptic density assembly); GO:0098839(postsynaptic density membrane); GO:0060076(excit…	long-term synaptic potentiation; synapse organization; regulation of postsynaptic density assembly; positive regulation of synapse assembly; negative regulation of receptor internalization	protein binding; neurexin family protein binding	extracellular space; plasma membrane; synapse; postsynaptic membrane; membrane; glutamatergic synapse; postsynaptic density membrane; excitatory synapse; Schaffer collateral - CA1 synapse; hippocampal mossy fiber to CA3 synapse; GABA-ergic synapse; postsynaptic specialization membrane
ENSMUSG00000042759	1.68729	2.25277	2.43055	0.118991	0.999996	47	55	333	29	1.68952	2.73165	12.7806	1.44509	2.18709	7.1932	Apobr	apolipoprotein B receptor [Source:MGI Symbol;Acc:MGI:2176230]	GO:0006869(lipid transport); GO:0030228(lipoprotein particle receptor activity); GO:0006641(triglyceride metabolic process); GO:0005886(plasma membrane); GO:0008203(cholesterol metabolic process); GO:0016192(vesicle-mediated transport); GO:0034361(very-low-density lipoprotein particle); GO:0042627(chylomicron); GO:0034362(low-density lipoprotein particle); GO:0030229(very-low-density lipoprotein …	lipid transport; triglyceride metabolic process; cholesterol metabolic process; vesicle-mediated transport	lipoprotein particle receptor activity; very-low-density lipoprotein particle receptor activity	plasma membrane; very-low-density lipoprotein particle; chylomicron; low-density lipoprotein particle
ENSMUSG00000015090	-1.6864	4.29716	6.3471	0.0117573	0.999996	1226	314	159	250	44.0712	15.5952	6.10243	12.4577	29.8968	9.24413	Ptgds	prostaglandin D2 synthase (brain) [Source:MGI Symbol;Acc:MGI:99261]	GO:0036094(small molecule binding); GO:0010467(gene expression); GO:0005634(nucleus); GO:0005737(cytoplasm); GO:0016020(membrane); GO:0005794(Golgi apparatus); GO:0005615(extracellular space); GO:0005783(endoplasmic reticulum); GO:0005576(extracellular region); GO:0031965(nuclear membrane); GO:0048471(perinuclear region of cytoplasm); GO:0043303(mast cell degranulation); GO:0016853(isomerase acti…	gene expression; mast cell degranulation; prostaglandin biosynthetic process; negative regulation of male germ cell proliferation; regulation of circadian sleep/wake cycle, sleep; response to glucocorticoid	small molecule binding; isomerase activity; retinoid binding; prostaglandin-D synthase activity; fatty acid binding	nucleus; cytoplasm; membrane; Golgi apparatus; extracellular space; endoplasmic reticulum; extracellular region; nuclear membrane; perinuclear region of cytoplasm; rough endoplasmic reticulum; nucleoplasm
ENSMUSG00000064208	1.68574	-1.09529	4.40833	0.0357639	0.999996	6.8	2.07	14.69	12.45	0.244441	0.102809	0.563803	0.620393	0.182975	0.589897	Gm10145	predicted gene 10145 [Source:MGI Symbol;Acc:MGI:3704353]
ENSMUSG00000000093	-1.68559	2.0157	4.37523	0.0364648	0.999996	204	95	24	57	7.33323	4.71831	0.921122	2.84036	6.05173	1.84038	Tbx2	T-box 2 [Source:MGI Symbol;Acc:MGI:98494]	GO:0006355(regulation of DNA-templated transcription); GO:0005634(nucleus); GO:0003700(DNA-binding transcription factor activity); GO:0000978(RNA polymerase II cis-regulatory region sequence-specific DNA binding); GO:0045893(positive regulation of DNA-templated transcription); GO:0090398(cellular senescence); GO:0005515(protein binding); GO:0000122(negative regulation of transcription by RNA poly…	regulation of DNA-templated transcription; positive regulation of DNA-templated transcription; cellular senescence; negative regulation of transcription by RNA polymerase II; heart morphogenesis; positive regulation of transcription by RNA polymerase II; regulation of transcription by RNA polymerase II; apoptotic process; roof of mouth development; neurogenesis; negative regulation of DNA-templat…	DNA-binding transcription factor activity; RNA polymerase II cis-regulatory region sequence-specific DNA binding; protein binding; DNA binding; DNA-binding transcription factor activity, RNA polymerase II-specific; DNA-binding transcription factor binding; histone deacetylase binding; sequence-specific double-stranded DNA binding; DNA-binding transcription repressor activity, RNA polymerase II-sp…	nucleus; cytoplasm; chromatin; transcription regulator complex
ENSMUSG00000057123	-1.68348	0.463626	4.08013	0.0433904	0.999996	27	61	14	14	0.970574	3.02965	0.537321	0.697631	1.94977	0.61133	Gja5	gap junction protein, alpha 5 [Source:MGI Symbol;Acc:MGI:95716]	GO:0007154(cell communication); GO:0005922(connexin complex); GO:0005886(plasma membrane); GO:0055085(transmembrane transport); GO:0005921(gap junction); GO:0005243(gap junction channel activity); GO:0055077(gap junction hemi-channel activity); GO:0071253(connexin binding); GO:0086075(gap junction channel activity involved in cardiac conduction electrical coupling); GO:0086076(gap junction channe…	cell communication; transmembrane transport; angiogenesis; negative regulation of glomerular filtration; outflow tract morphogenesis; endothelium development; mitral valve development; pulmonary valve formation; ventricular septum development; atrial septum development; potassium ion transport; heart development; cell communication by chemical coupling; cell communication by electrical coupling; …	gap junction channel activity; gap junction hemi-channel activity; connexin binding; gap junction channel activity involved in cardiac conduction electrical coupling; gap junction channel activity involved in atrial cardiac muscle cell-AV node cell electrical coupling; gap junction channel activity involved in AV node cell-bundle of His cell electrical coupling; gap junction channel activity invo…	connexin complex; plasma membrane; gap junction; intercalated disc; cell projection
ENSMUSG00000046491	-1.6833	-1.10609	3.97161	0.0462735	0.999996	12	15	3	5	0.431366	0.744996	0.11514	0.249154	0.573129	0.174888	C1qtnf2	C1q and tumor necrosis factor related protein 2 [Source:MGI Symbol;Acc:MGI:1916433]	GO:0005515(protein binding); GO:0005576(extracellular region); GO:0005615(extracellular space); GO:0005581(collagen trimer); GO:0043410(positive regulation of MAPK cascade); GO:0019216(regulation of lipid metabolic process); GO:0032991(protein-containing complex); GO:0042802(identical protein binding); GO:0046326(positive regulation of glucose import); GO:0005102(signaling receptor binding); GO:0…	positive regulation of MAPK cascade; regulation of lipid metabolic process; positive regulation of glucose import; positive regulation of fatty acid oxidation; positive regulation of glycogen biosynthetic process	protein binding; identical protein binding; signaling receptor binding	extracellular region; extracellular space; collagen trimer; protein-containing complex
ENSMUSG00000026204	-1.68085	1.36056	2.02864	0.154359	0.999996	32	131	9	41	1.15031	6.5063	0.345421	2.04306	3.74851	1.14632	Ptprn	protein tyrosine phosphatase receptor type N [Source:MGI Symbol;Acc:MGI:102765]	GO:0004725(protein tyrosine phosphatase activity); GO:0006470(protein dephosphorylation); GO:0016311(dephosphorylation); GO:0030141(secretory granule); GO:0016020(membrane); GO:0031410(cytoplasmic vesicle); GO:0045202(synapse); GO:0030658(transport vesicle membrane); GO:0030507(spectrin binding); GO:0044389(ubiquitin-like protein ligase binding); GO:0000302(response to reactive oxygen species); G…	protein dephosphorylation; dephosphorylation; response to reactive oxygen species; insulin secretion; positive regulation of transcription by RNA polymerase II; positive regulation of type B pancreatic cell proliferation; dense core granule maturation	protein tyrosine phosphatase activity; spectrin binding; ubiquitin-like protein ligase binding	secretory granule; membrane; cytoplasmic vesicle; synapse; transport vesicle membrane; nucleus
ENSMUSG00000121579	1.67952	-0.759666	4.63468	0.031332	0.999996	4	7	22	14	0.143789	0.347665	0.844361	0.697631	0.232885	0.776063	SMIM46	novel protein	GO:0016020(membrane)			membrane
ENSMUSG00000022425	-1.67789	4.68785	4.66377	0.0308055	0.999996	1823	255	311	251	65.5317	12.6649	11.9362	12.5075	39.1889	12.2194	Enpp2	ectonucleotide pyrophosphatase/phosphodiesterase 2 [Source:MGI Symbol;Acc:MGI:1321390]	GO:0046872(metal ion binding); GO:0006955(immune response); GO:0016787(hydrolase activity); GO:0003676(nucleic acid binding); GO:0005044(scavenger receptor activity); GO:0030247(polysaccharide binding); GO:0008284(positive regulation of cell population proliferation); GO:0048714(positive regulation of oligodendrocyte differentiation); GO:0005615(extracellular space); GO:0005509(calcium ion bindin…	immune response; positive regulation of cell population proliferation; positive regulation of oligodendrocyte differentiation; chemotaxis; lipid catabolic process; vesicle-mediated transport; phospholipid metabolic process; phosphatidylcholine catabolic process; cell chemotaxis; positive regulation of focal adhesion assembly; positive regulation of substrate adhesion-dependent cell spreading; neg…	metal ion binding; hydrolase activity; nucleic acid binding; scavenger receptor activity; polysaccharide binding; calcium ion binding; hydrolase activity, acting on ester bonds; zinc ion binding; lysophospholipase activity; phospholipase D activity; alkylglycerophosphoethanolamine phosphodiesterase activity; dinucleotide phosphatase activity; phosphodiesterase I activity	extracellular space; extracellular region; plasma membrane; membrane
ENSMUSG00000020614	-1.6739	0.988867	3.04216	0.081128	0.999996	134	18	22	19	4.81692	0.893995	0.844361	0.946785	2.9266	0.892268	Fam20a	FAM20A, golgi associated secretory pathway pseudokinase [Source:MGI Symbol;Acc:MGI:2388266]	GO:0009617(response to bacterium); GO:0005737(cytoplasm); GO:0005794(Golgi apparatus); GO:0005783(endoplasmic reticulum); GO:0005576(extracellular region); GO:0070166(enamel mineralization); GO:0031214(biomineral tissue development); GO:0001934(positive regulation of protein phosphorylation); GO:0005615(extracellular space); GO:0043539(protein serine/threonine kinase activator activity); GO:00446…	response to bacterium; enamel mineralization; biomineral tissue development; positive regulation of protein phosphorylation; tooth eruption; calcium ion homeostasis	protein serine/threonine kinase activator activity	cytoplasm; Golgi apparatus; endoplasmic reticulum; extracellular region; extracellular space
ENSMUSG00000039114	-1.67299	3.34367	2.12865	0.144568	0.999996	71	568	63	145	2.55225	28.2105	2.41794	7.22546	15.2722	4.77303	Nrn1	neuritin 1 [Source:MGI Symbol;Acc:MGI:1915654]	GO:0007399(nervous system development); GO:0016020(membrane); GO:0005515(protein binding); GO:0005886(plasma membrane); GO:0005615(extracellular space); GO:0098552(side of membrane); GO:0045202(synapse); GO:0098978(glutamatergic synapse); GO:0098793(presynapse); GO:0042802(identical protein binding); GO:0099171(presynaptic modulation of chemical synaptic transmission); GO:0007409(axonogenesis); G…	nervous system development; presynaptic modulation of chemical synaptic transmission; axonogenesis; regulation of synapse maturation; neuron projection extension	protein binding; identical protein binding	membrane; plasma membrane; extracellular space; side of membrane; synapse; glutamatergic synapse; presynapse; AMPA glutamate receptor complex
ENSMUSG00000134786	-1.67216	-0.485955	2.70422	0.100083	0.999996	40.84	8.06	11.94	2.29	1.46808	0.400311	0.458258	0.114113	0.974214	0.302814		novel transcript
ENSMUSG00000025058	1.67149	0.341685	2.30501	0.128957	0.999996	21	7	82	8	0.754891	0.347665	3.14717	0.398646	0.570853	1.83091	Tasl	TLR adaptor interacting with endolysosomal SLC15A4 [Source:MGI Symbol;Acc:MGI:1918648]	GO:0034121(regulation of toll-like receptor signaling pathway); GO:0005634(nucleus); GO:0005737(cytoplasm); GO:0016020(membrane); GO:0005765(lysosomal membrane); GO:0005768(endosome); GO:0005764(lysosome); GO:0045087(innate immune response); GO:0010008(endosome membrane); GO:0035751(regulation of lysosomal lumen pH); GO:0045089(positive regulation of innate immune response); GO:0034157(positive r…	regulation of toll-like receptor signaling pathway; innate immune response; regulation of lysosomal lumen pH; positive regulation of innate immune response; positive regulation of toll-like receptor 7 signaling pathway; positive regulation of toll-like receptor 8 signaling pathway		nucleus; cytoplasm; membrane; lysosomal membrane; endosome; lysosome; endosome membrane; nucleoplasm; endolysosome membrane; intracellular membrane-bounded organelle
ENSMUSG00000032739	1.66671	1.47449	3.91531	0.0478483	0.999996	53	13	144.1	53	1.9052	0.645663	5.53057	2.64103	1.31522	4.11888	Pram1	PML-RAR alpha-regulated adaptor molecule 1 [Source:MGI Symbol;Acc:MGI:3576625]	GO:0005515(protein binding); GO:0005886(plasma membrane); GO:0007229(integrin-mediated signaling pathway); GO:0008289(lipid binding); GO:0050852(T cell receptor signaling pathway); GO:0072659(protein localization to plasma membrane); GO:0043313(regulation of neutrophil degranulation); GO:0019901(protein kinase binding); GO:0032991(protein-containing complex)	integrin-mediated signaling pathway; T cell receptor signaling pathway; protein localization to plasma membrane; regulation of neutrophil degranulation	protein binding; lipid binding; protein kinase binding	plasma membrane; protein-containing complex
ENSMUSG00000020407	-1.66281	0.807457	2.85121	0.0913055	0.999996	28	83	11	24	1.00652	4.12231	0.422181	1.19594	2.50075	0.782446	Upp1	uridine phosphorylase 1 [Source:MGI Symbol;Acc:MGI:1097668]	GO:0003824(catalytic activity); GO:0005737(cytoplasm); GO:0009116(nucleoside metabolic process); GO:0016763(pentosyltransferase activity); GO:0009166(nucleotide catabolic process); GO:0004850(uridine phosphorylase activity); GO:0005829(cytosol); GO:0016757(glycosyltransferase activity); GO:0044206(UMP salvage); GO:0042802(identical protein binding); GO:0009164(nucleoside catabolic process); GO:00…	nucleoside metabolic process; nucleotide catabolic process; UMP salvage; nucleoside catabolic process; pyrimidine nucleotide metabolic process; uridine metabolic process; uridine catabolic process; CMP catabolic process; dCMP catabolic process; cellular response to glucose starvation; UMP catabolic process; dTMP catabolic process; dUMP catabolic process	catalytic activity; pentosyltransferase activity; uridine phosphorylase activity; glycosyltransferase activity; identical protein binding; thymidine phosphorylase activity; deoxyuridine phosphorylase activity	cytoplasm; cytosol; nucleoplasm
ENSMUSG00000127043	-1.66107	-0.905642	4.41312	0.0356636	0.999996	15	17	7	3	0.539208	0.844328	0.26866	0.149492	0.678126	0.215294		novel transcript, antisense to Jade2
ENSMUSG00000118171	1.66029	-0.945433	1.64992	0.198969	0.999996	11.21	0	8.27	20.75	0.402968	0	0.317403	1.03399	0.227004	0.648899	Gm50390	predicted gene, 50390 [Source:MGI Symbol;Acc:MGI:6303294]
ENSMUSG00000106224	-1.6567	0.130335	1.78573	0.181447	0.999996	49.99	25	24	0.45	1.797	1.24166	0.921122	0.0224239	1.53526	0.508766	Gm43823	predicted gene 43823 [Source:MGI Symbol;Acc:MGI:5663960]
ENSMUSG00000023886	-1.65646	1.66922	2.50374	0.113577	0.999996	230	21	38	30	8.26785	1.04299	1.45844	1.49492	4.74392	1.4758	Smoc2	SPARC related modular calcium binding 2 [Source:MGI Symbol;Acc:MGI:1929881]	GO:0005515(protein binding); GO:0005509(calcium ion binding); GO:0062023(collagen-containing extracellular matrix); GO:0046872(metal ion binding); GO:0005615(extracellular space); GO:0005576(extracellular region); GO:0031012(extracellular matrix); GO:0005604(basement membrane); GO:0030198(extracellular matrix organization); GO:0008201(heparin binding); GO:0010811(positive regulation of cell-subst…	extracellular matrix organization; positive regulation of cell-substrate adhesion; positive regulation of endothelial cell migration; positive regulation of vascular wound healing; positive regulation of fibroblast growth factor receptor signaling pathway; positive regulation of angiogenesis; positive regulation of mitotic cell cycle; positive regulation of vascular endothelial growth factor sign…	protein binding; calcium ion binding; metal ion binding; heparin binding; glycosaminoglycan binding; extracellular matrix binding	collagen-containing extracellular matrix; extracellular space; extracellular region; extracellular matrix; basement membrane; interstitial matrix; cell periphery
ENSMUSG00000049871	1.65395	0.590684	3.29666	0.0694207	0.999996	25	9	88	18	0.89868	0.446997	3.37745	0.896954	0.692841	2.18353	Nlrc3	NLR family, CARD domain containing 3 [Source:MGI Symbol;Acc:MGI:2444070]	GO:0005515(protein binding); GO:0032496(response to lipopolysaccharide); GO:0005737(cytoplasm); GO:0005524(ATP binding); GO:0005829(cytosol); GO:0035556(intracellular signal transduction); GO:0010646(regulation of cell communication); GO:0023051(regulation of signaling); GO:0048471(perinuclear region of cytoplasm); GO:0045088(regulation of innate immune response); GO:0032687(negative regulation o…	response to lipopolysaccharide; intracellular signal transduction; regulation of cell communication; regulation of signaling; regulation of innate immune response; negative regulation of interferon-alpha production; negative regulation of canonical NF-kappaB signal transduction; negative regulation of inflammatory response; negative regulation of phosphatidylinositol 3-kinase/protein kinase B sig…	protein binding; ATP binding; phosphatidylinositol 3-kinase regulatory subunit binding; molecular function inhibitor activity	cytoplasm; cytosol; perinuclear region of cytoplasm; centriolar satellite; intracellular membrane-bounded organelle
ENSMUSG00000045868	1.65216	1.02689	0.81396	0.366952	0.999996	20	23	152.66	0	0.718944	1.14233	5.8591	0	0.91423	3.01561	Gvin1	GTPase, very large interferon inducible 1 [Source:MGI Symbol;Acc:MGI:1921808]	GO:0005525(GTP binding); GO:0005634(nucleus); GO:0005737(cytoplasm)		GTP binding	nucleus; cytoplasm
[truncated: 17,679 more rows]
